# Supplementary material for: Partial rejuvenation of the spermatogonial stem cell niche after gender-affirming hormone therapy in trans women
Source: eLife. 2025 Jan 7;13:RP94825. doi: 10.7554/eLife.94825 (PMC11706602; doi:10.7554/eLife.94825)
Supplement: Supplementary file 7. [file elife-94825-supp7.xlsx]

## Sheet: Sheet1
Supplementary File 7. Full list of GO terms enrichment analysis.
term	category	gene.cluster	genes	number of genes	adj.p.hyper.enri
biological adhesion (GO:0022610)	biological_process	P1	SEMA6A|CDH1|KIRREL1|HAPLN1|SIRPA|CCR1|KLRK1|SOX4|ZFHX3|PCDHGA6|TNN|MSN|GSN|FAT1|THEMIS2|DLL1|CD200|NINJ2|ROBO1|PPP1CA|VSIG4|HSPB1|CD63|GLI2|RPS3|ACTB|PCDHGC3|SERPINB8|ATP1B1|CDH19|COL1A1|MYL12A|FAT4|AJUBA|IL12B|BCAM|TLN1|LGALS1|ACHE|PCDHGB6|TRO|CD28|DTX1|SOX13|PPP2R1A|ZYX|ETS1|PRKCA|APBB1IP|COL3A1|NEGR1|RDX|NRCAM|LIMS2|SMAD3|EMP2|SPOCK2|APOA1|ELANE|LIMCH1|NEDD9|NTNG1|LAMA2|ZFP36L1|MDGA1|KIRREL3|I…	220	1.21774e-19
cell adhesion (GO:0007155)	biological_process	P1	SEMA6A|CDH1|KIRREL1|HAPLN1|SIRPA|CCR1|KLRK1|SOX4|ZFHX3|PCDHGA6|TNN|MSN|GSN|FAT1|THEMIS2|DLL1|CD200|NINJ2|ROBO1|PPP1CA|VSIG4|HSPB1|CD63|GLI2|RPS3|ACTB|PCDHGC3|SERPINB8|ATP1B1|CDH19|COL1A1|MYL12A|FAT4|AJUBA|IL12B|BCAM|TLN1|LGALS1|ACHE|PCDHGB6|TRO|CD28|DTX1|SOX13|PPP2R1A|ZYX|ETS1|PRKCA|APBB1IP|COL3A1|NEGR1|RDX|NRCAM|LIMS2|SMAD3|EMP2|SPOCK2|APOA1|ELANE|LIMCH1|NEDD9|NTNG1|LAMA2|ZFP36L1|MDGA1|KIRREL3|I…	219	1.21774e-19
regulation of developmental process (GO:0050793)	biological_process	P1	SEMA6A|ZNF219|VGLL4|EPHB2|WNT6|DDAH1|CCR1|ZBED3|SOX4|WWTR1|RGS4|ZFHX3|RHOC|CCBE1|DPYSL2|MOV10|TNN|MSN|CCDC3|PPIB|COL5A2|RAB17|DLL1|TRIB2|ROBO1|ZNRF3|CDKN1B|TMEM176B|HSPB1|ANKRD6|BMPR2|FZD2|NIBAN2|SEMA4C|GLI2|PTPRZ1|FGR|TWIST1|EID1|MAML1|TSKU|FOXJ2|COL1A1|FAT4|YWHAH|NKX6-3|IL12B|TRIB3|INSR|AMH|PFN1|ARRB2|CD28|DTX1|SOX13|SIK1|ANXA3|PPP2R1A|NAP1L2|GATA6|YAP1|ABCA1|ETS1|ZNF536|SMAD5|LRP5|PRKCA|ZFP36L…	314	1.86943e-18
anatomical structure morphogenesis (GO:0009653)	biological_process	P1	NDN|FAM20C|SEMA6A|CAPN1|ZNF219|EPHB2|WNT6|DDAH1|ARHGAP22|NAGLU|SOX4|WWTR1|PTPN14|AMHR2|MMP2|RHOC|TCF21|CCBE1|DPYSL2|MOV10|TNN|MSN|ADAMTS5|COL5A2|COL4A1|FAT1|DLL1|ROBO1|ZNRF3|ZSWIM5|TMEM176B|PPP1CA|HSPB1|EFNA2|ANKRD6|BMPR2|FZD2|NIBAN2|SEMA4C|GLI2|FGR|TWIST1|ACTB|BCAR3|TET1|DCLK1|COL27A1|TSKU|FOXJ2|CDH19|C1GALT1C1|COL1A1|FAT4|YWHAH|AJUBA|IL12B|INSR|AMH|PFN1|ARRB2|SOX13|ANXA3|GATA6|YAP1|SH3PXD2A|ETS…	327	1.21664e-16
anatomical structure development (GO:0048856)	biological_process	P1	NDN|FAM20C|SEMA6A|CAPN1|ILDR2|CDH1|ZNF219|VGLL4|EPHB2|WNT6|HAPLN1|DDAH1|PATZ1|ARHGAP22|C6|BLOC1S1|FLNB|CCR1|WFIKKN2|PLCL2|ZBED3|STOX2|NAGLU|SOX4|WWTR1|RPS4Y1|RGS4|ZFHX3|PTPN14|AMHR2|MMP2|RHOC|NAV2|ARSL|TCF21|CCBE1|DPYSL2|PAPSS1|MOV10|TNN|MSN|GSN|GSDME|PPIB|ADAMTS5|COL5A2|RAB17|COL4A1|FAT1|GNRHR|DLL1|MR1|NINJ2|SCN9A|INSRR|ROBO1|ZNRF3|ZSWIM5|CDKN1B|TMEM176B|PPP1CA|HSPB1|EFNA2|ANKRD6|BMPR2|FZD2|IGF1…	595	1.36706e-14
multicellular organism development (GO:0007275)	biological_process	P1	NDN|FAM20C|SEMA6A|CAPN1|ILDR2|CDH1|ZNF219|VGLL4|EPHB2|WNT6|HAPLN1|DDAH1|PATZ1|ARHGAP22|C6|BLOC1S1|FLNB|CCR1|WFIKKN2|PLCL2|ZBED3|STOX2|NAGLU|SOX4|WWTR1|RPS4Y1|RGS4|ZFHX3|PTPN14|AMHR2|MMP2|NAV2|ARSL|TCF21|CCBE1|DPYSL2|PAPSS1|MOV10|TNN|MSN|GSN|GSDME|PPIB|ADAMTS5|COL5A2|RAB17|COL4A1|GNRHR|DLL1|MR1|NINJ2|SCN9A|INSRR|ROBO1|ZNRF3|ZSWIM5|CDKN1B|TMEM176B|PPP1CA|HSPB1|EFNA2|ANKRD6|BMPR2|FZD2|IGF1R|NIBAN2|P…	552	4.2198e-14
system development (GO:0048731)	biological_process	P1	NDN|FAM20C|SEMA6A|CAPN1|ILDR2|CDH1|ZNF219|VGLL4|EPHB2|WNT6|HAPLN1|DDAH1|PATZ1|ARHGAP22|BLOC1S1|FLNB|CCR1|WFIKKN2|PLCL2|STOX2|NAGLU|SOX4|WWTR1|RGS4|ZFHX3|PTPN14|AMHR2|MMP2|NAV2|ARSL|TCF21|CCBE1|DPYSL2|PAPSS1|MOV10|TNN|MSN|GSN|GSDME|PPIB|ADAMTS5|COL5A2|RAB17|COL4A1|DLL1|MR1|NINJ2|ROBO1|ZNRF3|ZSWIM5|CDKN1B|TMEM176B|PPP1CA|HSPB1|EFNA2|ANKRD6|BMPR2|FZD2|NIBAN2|PCARE|SEMA4C|OPN3|GLI2|DPF3|PTPRZ1|FGR|TW…	510	6.56394e-15
developmental process (GO:0032502)	biological_process	P1	NDN|FAM20C|SEMA6A|CAPN1|ILDR2|CDH1|ZNF219|VGLL4|EPHB2|WNT6|HAPLN1|DDAH1|PATZ1|ARHGAP22|GGT1|C6|BLOC1S1|FLNB|CCR1|WFIKKN2|PLCL2|ZBED3|STOX2|KLRK1|NAGLU|SOX4|WWTR1|RPS4Y1|RGS4|ZFHX3|PTPN14|AMHR2|MMP2|RHOC|RPS3A|NAV2|ARSL|TCF21|CCBE1|DPYSL2|PAPSS1|MOV10|TNN|CREB3L4|MSN|CCDC3|GSN|GSDME|PPIB|ADAMTS5|COL5A2|RAB17|COL4A1|FAT1|GNRHR|DLL1|MR1|NINJ2|SCN9A|TRIB2|INSRR|ROBO1|ZNRF3|ZSWIM5|CDKN1B|TMEM176B|PPP1…	638	8.91234e-15
negative regulation of biological process (GO:0048519)	biological_process	P1	NDN|LSM7|SEMA6A|CDH1|BMF|CCDC22|ZNF219|VGLL4|EPHB2|DDAH1|PATZ1|PKIA|SIRPA|HTRA3|CCR1|WFIKKN2|PLCL2|MTMR8|ZBED3|IFITM2|H1-0|KLRK1|SOX4|PHF6|WWTR1|APOC1|RPS4Y1|RGS4|ZFHX3|TRIM21|PTPN14|IRF2|RPS3A|IFI6|TCF21|PMEPA1|MOV10|TNN|MVP|CCDC3|GSN|GSDME|ADAMTS5|COL5A2|H1-10|THAP11|IRS1|TFAP4|UBQLN2|DLL1|RPL39|CD200|ZC3HAV1|TRIB2|ROBO1|ZNRF3|TSC22D4|IGFBP4|ABHD6|CDKN1B|TMEM176B|VSIG4|HSPB1|NUAK2|ANKRD6|BMPR2|…	585	1.1207e-14
cell surface receptor signaling pathway (GO:0007166)	biological_process	P1	NDN|ADGRD2|SEMA6A|VGLL4|EPHB2|WNT6|HTRA3|CASP4|CCR1|WFIKKN2|PLCL2|GNG2|ZBED3|IFITM2|SOX4|WWTR1|RGS4|TRIM21|AMHR2|MMP2|IRF2|IFI6|FGFBP3|CCBE1|PMEPA1|MOV10|TNN|MVP|MSN|CCDC3|COL4A1|IRS1|DTX4|THEMIS2|DLL1|INSRR|ROBO1|ZNRF3|IGFBP4|PPP1CA|HSPB1|EFNA2|ANKRD6|BMPR2|FZD2|IGF1R|NIBAN2|SEMA4C|CD63|GLI2|PTPRZ1|FGR|TWIST1|RPS3|ACTB|BCAR3|MAML3|MAML1|TSKU|COL1A1|FAT4|IFI35|PYGO2|IL12B|PLCB3|INSR|LY6E|TLN1|AMH…	354	3.15537e-14
cell migration (GO:0016477)	biological_process	P1	NDN|SEMA6A|CDH1|PATZ1|SIRPA|CCR1|KLRK1|RHOC|CCBE1|TNN|MSN|PPIB|FAT1|PLA2G7|CD200|ROBO1|ABHD6|ATP8A1|HSPB1|BMPR2|IGF1R|SEMA4C|CD63|FGR|TWIST1|ATP1B1|DCLK1|COL1A1|AJUBA|IL12B|INSR|PFN1|ARRB2|ANXA3|ETS1|LRP5|PRKCA|COL3A1|RDX|DAB2|SEMA6B|NRCAM|LIMA1|CSF1R|ZFAND5|SMAD3|EMP2|ARID5B|APOA1|ELANE|LIMCH1|NEDD9|RHBDF1|AMOTL2|NTNG1|LAMA2|ZEB2|MDGA1|GRB7|TDGF1|KIRREL3|ITGAV|GLIPR2|SERPINF1|SH3KBP1|BMP2|ITGB5|…	210	4.46309e-14
movement of cell or subcellular component (GO:0006928)	biological_process	P1	NDN|SEMA6A|CDH1|EPHB2|PATZ1|BLOC1S1|SIRPA|CCR1|LCA5|KLRK1|KCNJ5|RHOC|CCBE1|DPYSL2|TNN|MSN|GSN|PPIB|FAT1|PLA2G7|CD200|ROBO1|ZSWIM5|ABHD6|ATP8A1|HSPB1|EFNA2|BMPR2|IGF1R|NIBAN2|SEMA4C|CD63|GLI2|FGR|TWIST1|ACTB|ATP1B1|DCLK1|COL1A1|KCNQ1|TPM4|AJUBA|IL12B|INSR|MYL6|PFN1|ARRB2|KIF3C|ANXA3|ETS1|LRP5|PRKCA|COL3A1|RDX|DAB2|SEMA6B|NRCAM|LIMA1|BLOC1S5|CSF1R|RAB6A|ZFAND5|SMAD3|EMP2|ARID5B|SPOCK2|APOA1|ELANE|L…	264	4.43012e-12
locomotion (GO:0040011)	biological_process	P1	NDN|SEMA6A|CDH1|EPHB2|PATZ1|SIRPA|CCR1|KLRK1|RHOC|CCBE1|DPYSL2|TNN|MSN|PPIB|FAT1|PLA2G7|CD200|ROBO1|ZSWIM5|ABHD6|ATP8A1|HSPB1|EFNA2|BMPR2|IGF1R|NIBAN2|SEMA4C|CD63|GLI2|FGR|TWIST1|ACTB|ATP1B1|DCLK1|COL1A1|AJUBA|IL12B|INSR|PFN1|ARRB2|ANXA3|ETS1|LRP5|PRKCA|COL3A1|RDX|DAB2|SEMA6B|NRCAM|LIMA1|CSF1R|ZFAND5|SMAD3|EMP2|ARID5B|SPOCK2|APOA1|ELANE|LIMCH1|NEDD9|RHBDF1|AMOTL2|NTNG1|LAMA2|ZEB2|MDGA1|GRB7|TDGF1…	237	6.46696e-12
cell motility (GO:0048870)	biological_process	P1	NDN|SEMA6A|CDH1|PATZ1|SIRPA|CCR1|KLRK1|RHOC|CCBE1|TNN|MSN|PPIB|FAT1|PLA2G7|CD200|ROBO1|ABHD6|ATP8A1|HSPB1|BMPR2|IGF1R|SEMA4C|CD63|FGR|TWIST1|ACTB|ATP1B1|DCLK1|COL1A1|AJUBA|IL12B|INSR|PFN1|ARRB2|ANXA3|ETS1|LRP5|PRKCA|COL3A1|RDX|DAB2|SEMA6B|NRCAM|LIMA1|CSF1R|ZFAND5|SMAD3|EMP2|ARID5B|SPOCK2|APOA1|ELANE|LIMCH1|NEDD9|RHBDF1|AMOTL2|NTNG1|LAMA2|ZEB2|MDGA1|GRB7|TDGF1|KIRREL3|ITGAV|GLIPR2|SERPINF1|SH3KBP1…	217	1.38408e-11
localization of cell (GO:0051674)	biological_process	P1	NDN|SEMA6A|CDH1|PATZ1|SIRPA|CCR1|KLRK1|RHOC|CCBE1|TNN|MSN|PPIB|FAT1|PLA2G7|CD200|ROBO1|ABHD6|ATP8A1|HSPB1|BMPR2|IGF1R|SEMA4C|CD63|FGR|TWIST1|ACTB|ATP1B1|DCLK1|COL1A1|AJUBA|IL12B|INSR|PFN1|ARRB2|ANXA3|ETS1|LRP5|PRKCA|COL3A1|RDX|DAB2|SEMA6B|NRCAM|LIMA1|CSF1R|ZFAND5|SMAD3|EMP2|ARID5B|SPOCK2|APOA1|ELANE|LIMCH1|NEDD9|RHBDF1|AMOTL2|NTNG1|LAMA2|ZEB2|MDGA1|GRB7|TDGF1|KIRREL3|ITGAV|GLIPR2|SERPINF1|SH3KBP1…	217	1.38408e-11
protein targeting to membrane (GO:0006612)	biological_process	P1	RPS4Y1|RPS3A|RPL39|RPS3|RPL29|RPS16|RPL35|RPS28|RPS13|RPL12|RPS4X|RPL18A|RPLP2|RPL36|RPS5|RPL8|RPL11|RPL10A|PRNP|ERBB2|RPL6|RPS14|FYN|CDK5|ADORA1|RPS24|RPS15|RPL23|ZDHHC15|RPL34|RPL28|RPL27A|NACAD|MIEF2|RPL5|RPL9|RPS8|TCAF1|RPL14|RPL18|CHMP4B|RPL41|RPLP1|RPS2|RPL27|YIF1B|RPS27|RPS29	48	5.94354e-10
response to interferon-alpha (GO:0035455)	biological_process	P1	IFITM2|GATA3|IFIT3|EIF2AK2|IFNAR1|IFITM3|GAS6|AXL|IFIT2|IFNAR2|IFITM1	11	9.54687e-06
nuclear-transcribed mRNA catabolic process (GO:0000956)	biological_process	P1	LSM7|RPS4Y1|RPS3A|RPL39|RPS3|RPL29|RPS16|PPP2R1A|ZFP36L2|RPL35|RPS28|RPS13|RPL12|RPS4X|ZFP36L1|RPL18A|NBDY|RPLP2|RPL36|RPS5|RPL8|RPL11|RPL10A|HELZ2|CTIF|RPL6|RPS14|RPS24|RPS15|RPL23|RPL34|RPL28|RPL27A|RPL5|RPL9|RPS8|RPL14|RPL18|RPL41|RPLP1|RPS2|RPL27|EXOSC6|RPS27|RPS29	45	1.33007e-08
regulation of extracellular matrix organization (GO:1903053)	biological_process	P1	COLGALT1|ETS1|SMAD3|BMP2|ANTXR1|PDPN|DDR1|FSCN1|SOX9|DDR2|EMILIN1|DAG1|LRP1	13	0.00130201
smooth muscle cell migration (GO:0014909)	biological_process	P1	BMPR1A|POSTN|BCL2|PLXNA1|DDR1|ITGA2|MEF2C|APEX1|PDGFA|NFE2L2|MIR503|GSTP1|LRP1|IQGAP1	14	0.0358616
embryonic organ development (GO:0048568)	biological_process	P1	EPHB2|NAGLU|TCF21|DLL1|FZD2|GLI2|TWIST1|TFEB|YAP1|CHST11|SMAD3|SLC39A1|ZFP36L1|MTHFD1|HOXD4|EPHA2|GATA3|BMPR1A|EPAS1|ZFPM2|NOTCH2|MED12|SLITRK6|CITED1|NES|PBX3|TSHZ1|SOCS3|VEGFA|ID3|SOX9|MEF2C|MMP14|ALDH1A3|HES1|TBX2|TGFBR2|PPP1R13L|PDGFA|SOX11|FGF10|HEY2|GATA4|TP53|KRT8|IGF2|MDFI|HIPK2|CTNNB1|SPINT1	50	0.017847
endocardial cushion development (GO:0003197)	biological_process	P1	ROBO1|BMPR2|TWIST1|BMP2|ERBB3|BMPR1A|SOX9|TBX2|TGFBR2|HEY2|GATA4|JAG1	12	0.0020705
viral gene expression (GO:0019080)	biological_process	P1	RPS4Y1|TRIM21|RPS3A|TFAP4|RPL39|RPS3|RPL29|RPS16|NUCKS1|RPL35|RPS28|RPS13|RPL12|RPS4X|RPL18A|RPLP2|RPL36|RPS5|RPL8|RPL11|RPL10A|RPL6|RPS14|IFITM3|RPS24|RPS15|RPL23|MID2|RPL34|RPL28|RPL27A|MDFIC|RPL5|RPL9|RPS8|RPL14|SHFL|RPL18|JUN|RPL41|RPLP1|TRIM8|RPS2|RPL27|RPS27|RPS29	46	1.01424e-09
regulation of actin cytoskeleton organization (GO:0032956)	biological_process	P1	RGS4|RHOC|GSN|PFN1|RDX|LIMA1|CSF1R|SMAD3|APOA1|LIMCH1|TWF2|CDC42EP4|PYCARD|RAC2|ARHGEF10L|PIK3R1|NOTCH2|F11R|TACSTD2|FAM107A|CGNL1|PLEKHH2|RAPGEF3|CDK5|CORO2B|FSCN1|SVIL|RHOG|PDXP|PDGFA|FHOD3|CD47|RHOBTB3|S100A10|NCK2|CXCL12|PAM|PREX1|LRP1|RHOBTB2|GMFB|IQGAP1|SYNPO|RAC1	44	0.0179124
regulation of actin filament-based process (GO:0032970)	biological_process	P1	RGS4|RHOC|GSN|ABRACL|PFN1|RDX|LIMA1|CSF1R|SMAD3|APOA1|LIMCH1|TWF2|CDC42EP4|PYCARD|RAC2|ARHGEF10L|PIK3R1|PDPN|NOTCH2|F11R|TACSTD2|FAM107A|CGNL1|PLEKHH2|RAPGEF3|CDK5|PDE4D|ADORA1|CORO2B|FSCN1|SVIL|RHOG|PDXP|PDGFA|DSP|FHOD3|CD47|GATA4|MYH9|RHOBTB3|S100A10|STC1|NCK2|CXCL12|PAM|PREX1|LRP1|RHOBTB2|MYLK2|GMFB|IQGAP1|SYNPO|RAC1	53	0.0010853
leukocyte proliferation (GO:0070661)	biological_process	P1	PLCL2|MSN|VSIG4|RPS3|IL12B|CD28|CSF1R|TICAM1|IFNE|CD38|TNFSF13B|PYCARD|RAC2|PRNP|HSPD1|BCL2|ERBB2|NDFIP1|PKN1|FYN|FLT3|MEF2C|PRDX2|HES1|TGFBR2|SH3RF1|SOX11|EFNB1|FGF10|SYK|TP53|NCK2|CD22|IGF2|GSTP1|BAX|JAK3|CR1|TLR4|ELF4	40	0.0179328
leukocyte cell-cell adhesion (GO:0007159)	biological_process	P1	SIRPA|KLRK1|SOX4|MSN|VSIG4|GLI2|RPS3|IL12B|LGALS1|CD28|DTX1|SOX13|ETS1|ELANE|CLEC4M|GATA3|TNFSF13B|NFKBID|PYCARD|RAC2|PRNP|HSPD1|ZMIZ1|PIK3R1|F11R|SMAD7|ERBB2|STK10|NDFIP1|FYN|SELL|PRDX2|FUT9|HES1|TNIP1|TGFBR2|EFNB1|JAM2|FLOT2|ASS1|CD47|SYK|NCK2|CXCL12|IGF2|JAK3|CR1|ST3GAL4|RAC1|EXT1	50	0.00127398
regulation of cell-cell adhesion (GO:0022407)	biological_process	P1	CDH1|SIRPA|KLRK1|SOX4|VSIG4|GLI2|RPS3|IL12B|LGALS1|CD28|DTX1|SOX13|ETS1|PRKCA|RDX|APOA1|ELANE|MDGA1|BMP2|GATA3|TNFSF13B|NFKBID|PYCARD|LRFN3|PRNP|HSPD1|ZMIZ1|PIK3R1|PDPN|F11R|SMAD7|ERBB2|NDFIP1|FYN|VEGFA|CD9|PRDX2|FUT9|HES1|TGFBR2|EPHA7|EFNB1|FLOT2|ASS1|CD47|TENM3|EPHB3|SYK|JAG1|NCK2|CXCL12|IGF2|JAK3|CR1|ST3GAL4|C1QTNF1|RAC1	57	0.00158631
collagen fibril organization (GO:0030199)	biological_process	P1	COL5A2|COL1A1|COLGALT1|COL3A1|SERPINH1|PLOD3|COL5A1|LOXL2|LOXL4|DDR2|EMILIN1|COL1A2|EXT1	13	0.00407998
transmembrane receptor protein serine/threonine kinase signaling pathway (GO:0007178)	biological_process	P1	HTRA3|WFIKKN2|WWTR1|AMHR2|PMEPA1|BMPR2|AMH|ARRB2|ZYX|SMAD5|COL3A1|DAB2|CHST11|SMAD3|PCSK6|TDGF1|BMP2|ITGB5|USP9Y|BMPR1A|INHA|DAND5|ZMIZ1|NOTCH2|F11R|SMAD7|CITED1|BCL9L|CRIM1|GIPC1|FERMT1|NREP|GDF3|HES1|TGFBR2|ITGA3|SOX11|FGF10|APPL1|LTBP3|GATA4|EMILIN1|TP53|SMAD6|COL1A2|JUN|INHBB|VIM|CILP|HIPK2|TGFBRAP1|EXT1	52	0.000213446
regulation of autophagy (GO:0010506)	biological_process	P1	CAPN1|BMF|OSBPL7|MTMR8|TRIM21|UBQLN2|HSPB1|TRIB3|TFEB|KDM4A|CAMKK2|HSPB8|USP13|TICAM1|VDAC1|CTSA|SH3BP4|PYCARD|IFI16|TMEM150C|BCL2|DAPL1|CDK5|SREBF2|RALB|PRKD1|EEF1A1|MID2|SNCA|GATA4|CASP1|FYCO1|TP53|FOXO3|CHMP4B|SPTLC2|TRIM65|TRIM8|WDR6|SOGA1	40	0.0382598
lymphocyte differentiation (GO:0030098)	biological_process	P1	PATZ1|PLCL2|SOX4|DLL1|MR1|GLI2|IL12B|LGALS1|CD28|DTX1|SOX13|ZFP36L2|RELB|IFNE|ZFP36L1|GATA3|NFKBID|INHA|ZMIZ1|PIK3R1|NOTCH2|SMAD7|BCL2|ERBB2|LFNG|NDFIP1|FLT3|MMP14|PRDX2|GAS6|AXL|IL6R|TGFBR2|SH3RF1|B2M|BCL3|SYK|TP53|PREX1|CMTM7|BAX|JAK3|CR1	43	0.0402465
mammary gland epithelium development (GO:0061180)	biological_process	P1	ROBO1|GLI2|PYGO2|LRP5|DEAF1|CSF1R|EPHA2|GATA3|ERBB4|DDR1|FGF10|BAX	12	0.0444025
aortic valve development (GO:0003176)	biological_process	P1	ROBO1|BMPR2|TWIST1|BMP2|GATA3|SOX9|HEY2|GATA4|EMILIN1|JAG1|SMAD6	11	0.00212753
establishment of protein localization to membrane (GO:0090150)	biological_process	P1	BMF|RPS4Y1|UBL4A|RPS3A|RPL39|FRMPD1|RPS3|ATP1B1|YWHAB|YWHAH|RPL29|RPS16|REEP2|RPL35|RPS28|RPS13|RPL12|RPS4X|RPL18A|RPLP2|RPL36|RPS5|RPL8|RPL11|RPL10A|PRNP|BCL2|ERBB2|RPL6|RPS14|FYN|CDK5|ADORA1|RPS24|RPS15|RPL23|ZDHHC15|RPL34|RPL28|RPL27A|NACAD|MIEF2|RPL5|RPL9|RPS8|TP53|TCAF1|RPL14|RPL18|CHMP4B|RPL41|NSG1|RPLP1|MOAP1|RPS2|RPL27|YIF1B|BAX|CLSTN1|RPS27|RPS29	61	1.37859e-07
positive regulation of proteolysis (GO:0045862)	biological_process	P1	CCDC22|OSBPL7|CCBE1|GSN|TFAP4|UBQLN2|TRIB2|ROBO1|RPS3|TRIB3|DAB2|MAGEF1|USP13|SMAD3|HIP1|PYCARD|MTCH1|ANTXR1|HSPD1|APOE|IFI16|SMAD7|DET1|FYN|GRN|MMP14|ENO1|TNIP1|F2R|SNCA|NFE2L2|EGLN3|CSNK1E|NKX3-1|PLGRKT|MYH9|CASP1|ARL6IP5|ATP2A3|PSME1|SYK|BEX3|BAX|CR1	44	0.0311139
translation (GO:0006412)	biological_process	P1	EEF1A1P5|GGT1|SOX4|RPS4Y1|RPS3A|MOV10|RPL39|PPP1CA|HSPB1|RPS3|RPL29|RPS16|CD28|PDF|ZFP36L2|RPL35|RPS28|RPS13|LARP6|RPL12|RPS4X|ZFP36L1|GRB7|RPL18A|RPLP2|RPL36|RPS5|RPL8|RPL11|RPL10A|GADD45GIP1|ANG|ERBB2|EIF2AK2|COA3|SHMT2|FTO|CTIF|RPL6|MRPL16|RPS14|ITGA2|MRPL15|RPS24|RPS15|EEF1A1|MRPS26|CDK4|GGT7|RPL23|TNIP1|RPL34|RPL28|RPL27A|N6AMT1|MRPL23|MIR503|RPL5|BCL3|RPL9|RPS8|FOXO3|NCK2|ABTB1|RPL14|SHFL|R…	74	0.0365022
blood coagulation (GO:0007596)	biological_process	P1	EPHB2|GNG2|IRF2|HSPB1|TRPC3|ACTB|C1GALT1C1|COL1A1|MYL12A|TLN1|ARRB2|GATA6|PLSCR1|PRKCA|COL3A1|DOCK1|PRKAR2B|GATA3|ANO6|GP1BA|APOE|GNA14|ZFPM2|PIK3R1|PDPN|F11R|PROCR|ITGA2|FYN|VAV2|CD9|VCL|PRDX2|GAS6|AXL|PPIA|PDGFA|F2R|NFE2L2|PROS1|GATA4|MYH9|SYK|HPS6|COL1A2|P2RX7|ST3GAL4|TLR4|PRKAR1B|C1QTNF1|RAC1	51	9.8128e-05
coagulation (GO:0050817)	biological_process	P1	EPHB2|GNG2|IRF2|HSPB1|TRPC3|ACTB|C1GALT1C1|COL1A1|MYL12A|TLN1|ARRB2|GATA6|PLSCR1|PRKCA|COL3A1|DOCK1|PRKAR2B|GATA3|ANO6|GP1BA|APOE|GNA14|ZFPM2|PIK3R1|PDPN|F11R|PROCR|ITGA2|FYN|VAV2|CD9|VCL|PRDX2|GAS6|AXL|PPIA|PDGFA|F2R|NFE2L2|PROS1|GATA4|MYH9|SYK|HPS6|COL1A2|P2RX7|ST3GAL4|TLR4|PRKAR1B|C1QTNF1|RAC1	51	0.000133938
hemostasis (GO:0007599)	biological_process	P1	EPHB2|GNG2|IRF2|HSPB1|TRPC3|ACTB|C1GALT1C1|COL1A1|MYL12A|TLN1|ARRB2|GATA6|PLSCR1|PRKCA|COL3A1|DOCK1|PRKAR2B|GATA3|ANO6|GP1BA|APOE|GNA14|ZFPM2|PIK3R1|PDPN|F11R|PROCR|ITGA2|FYN|VAV2|CD9|VCL|PRDX2|GAS6|AXL|PPIA|PDGFA|F2R|NFE2L2|PROS1|GATA4|MYH9|SYK|HPS6|COL1A2|P2RX7|ST3GAL4|TLR4|PRKAR1B|C1QTNF1|RAC1	51	0.000133938
translational initiation (GO:0006413)	biological_process	P1	RPS4Y1|RPS3A|RPL39|PPP1CA|HSPB1|RPS3|RPL29|RPS16|RPL35|RPS28|RPS13|RPL12|RPS4X|RPL18A|RPLP2|RPL36|RPS5|RPL8|RPL11|RPL10A|EIF2AK2|CTIF|RPL6|RPS14|RPS24|RPS15|RPL23|RPL34|RPL28|RPL27A|RPL5|RPL9|RPS8|NCK2|RPL14|RPL18|RPL41|RPLP1|RPS2|RPL27|RPS27|RPS29	42	7.54551e-08
release of cytochrome c from mitochondria (GO:0001836)	biological_process	P1	BMF|IFI6|PPIF|ARRB2|HRK|PYCARD|BCL2|TP53|JUN|MOAP1|BAX	11	0.0439011
response to drug (GO:0042493)	biological_process	P1	CDH1|CYP2A6|BCAR3|COL1A1|KCNQ1|LGALS1|AMH|GATA6|FBP1|FZD1|APOA1|PRKAR2B|GATA3|CD38|KCNK3|NOS2|BCL2|ITGA2|FYN|SOX10|HSD11B2|MEF2C|APEX1|CDK4|GAS6|TGFBR2|COL18A1|QDPR|NFE2L2|CXCR4|ITGA3|B2M|NKX3-1|ASS1|OXTR|GATA4|CRHBP|ARL6IP5|DNMT3A|S100A10|TP53|WFDC1|PAM|JUN|CPT1A|CDH3|TGIF1|CYBB|CTNNB1	49	0.00155675
animal organ formation (GO:0048645)	biological_process	P1	ROBO1|GLI2|GATA6|WT1|BMP2|BMPR1A|SMARCD3|MEF2C|HES1|TGFBR2|FGF10|EXT1	12	0.0359229
mammary gland morphogenesis (GO:0060443)	biological_process	P1	CAPN1|GLI2|LRP5|CSF1R|EPHA2|DDR1|TBX2|TGFBR2|FGF10|BAX	10	0.0170621
ovarian follicle development (GO:0001541)	biological_process	P1	AMH|ARRB2|PCYT1B|INHA|BCL2|ANG|VEGFA|MMP14|CTNNA1|INHBB|BAX	11	0.0346361
striated muscle tissue development (GO:0014706)	biological_process	P1	VGLL4|RGS4|TCF21|DLL1|NIBAN2|TWIST1|MAML1|MYL6|ARRB2|SIK1|GATA6|YAP1|ALPK3|SMAD3|WT1|BMP2|TNNI3|MSC|ERBB3|ADAMTS9|ERBB4|BMPR1A|ZFPM2|SMAD7|BCL2|PPP3CA|BCL9L|GPC1|OBSL1|CDK5|VEGFA|SVIL|MEF2C|TAFAZZIN|ATF3|TBX2|TGFBR2|PPP1R13L|DSP|SOX11|FHOD3|HEY2|NLN|GATA4|PGM5|IGF2|HEG1|MYLK2|CDON	49	0.00102495
negative regulation of epithelial cell differentiation (GO:0030857)	biological_process	P1	DLL1|FOXJ2|NKX6-3|YAP1|S1PR3|CITED1|VEGFA|SOX9|GDF3|HES1|JAG1	11	0.0104828
negative regulation of fat cell differentiation (GO:0045599)	biological_process	P1	WWTR1|TRIB2|TRIB3|YAP1|ZFP36L2|SMAD3|GATA3|CCDC85B|TRIO|ZFPM2|RUNX1T1|JAG1	12	0.00907644
positive regulation of catabolic process (GO:0009896)	biological_process	P1	CCDC22|VGLL4|OSBPL7|TRIM21|MOV10|MSN|IRS1|UBQLN2|ZC3HAV1|TRIB2|CDKN1B|TWIST1|TRIB3|INSR|TFEB|CAMKK2|ZFP36L2|RDX|DAB2|MAGEF1|HSPB8|USP13|APOA1|TICAM1|VDAC1|ZFP36L1|SH3BP4|APC2|APOE|SMAD7|DET1|FTO|NDFIP1|ADORA1|LDLR|RALB|PRKD1|SOX9|MID2|SNCA|NFE2L2|HUWE1|AMER1|CSNK1E|DTX3L|FYCO1|FOXO3|P2RX7|CPT1A|SPTLC2|TRIM65|TRIM8|BAX|LRP1|LPCAT1	55	0.00984845
negative regulation of osteoblast differentiation (GO:0045668)	biological_process	P1	TNN|TWIST1|LRP5|SMAD3|CDK6|CITED1|CRIM1|ID3|SOX9|SMAD6|LIMD1	11	0.0171173
positive regulation of cellular catabolic process (GO:0031331)	biological_process	P1	CCDC22|VGLL4|OSBPL7|TRIM21|MOV10|MSN|IRS1|UBQLN2|ZC3HAV1|TRIB2|TWIST1|TRIB3|INSR|TFEB|CAMKK2|ZFP36L2|RDX|DAB2|MAGEF1|HSPB8|USP13|APOA1|TICAM1|VDAC1|ZFP36L1|SH3BP4|APOE|SMAD7|DET1|FTO|LDLR|RALB|PRKD1|MID2|SNCA|NFE2L2|AMER1|CSNK1E|DTX3L|FYCO1|FOXO3|P2RX7|CPT1A|SPTLC2|TRIM65|TRIM8|BAX|LRP1	48	0.0130676
epithelial tube morphogenesis (GO:0060562)	biological_process	P1	WNT6|SOX4|TCF21|COL4A1|DLL1|PPP1CA|FZD2|SEMA4C|GLI2|TWIST1|FAT4|YAP1|LRP5|DEAF1|CSF1R|SMAD3|WT1|BMP2|MTHFD1|LGR4|EPHA2|GATA3|MTSS1|NOTCH2|BCL2|MED12|TACSTD2|CITED1|DDR1|VEGFA|SOX9|MEF2C|MMP14|HES1|TBX2|TGFBR2|EPHA7|CXCR4|SOX11|FGF10|NKX3-1|GATA4|DAG1|CTNNB1|EXT1|SPINT1	46	0.000464582
response to transforming growth factor beta (GO:0071559)	biological_process	P1	HTRA3|WFIKKN2|ZFHX3|AMHR2|PMEPA1|COL1A1|MXRA5|ARRB2|ZYX|SMAD5|ZFP36L2|COL3A1|DAB2|CHST11|SMAD3|ZFP36L1|ITGB5|USP9Y|BMPR1A|DAND5|POSTN|ZMIZ1|F11R|SMAD7|CITED1|BCL9L|GIPC1|FYN|FERMT1|NREP|COL4A2|SOX9|MEF2C|TGFBR2|ITGA3|SOX11|APPL1|LTBP3|EMILIN1|TP53|SMAD6|COL1A2|JUN|CLDN1|CILP|HIPK2|TGFBRAP1	47	1.60646e-06
positive regulation of cell-matrix adhesion (GO:0001954)	biological_process	P1	SMAD3|EMP2|CDK6|RIN2|VEGFA|FERMT1|PLEKHA2|S100A10|DAG1|IQGAP1|RAC1	11	0.0439011
roof of mouth development (GO:0060021)	biological_process	P1	EPHB2|WFIKKN2|TCF21|FZD2|TWIST1|PYGO2|ARID5B|MSC|BMPR1A|DHRS3|TSHZ1|TBX2|TGFBR2|SOX11|EPHB3	15	0.0419061
regulation of platelet activation (GO:0010543)	biological_process	P1	PRKCA|APOE|PDPN|F11R|CD9|PDGFA|SYK|TLR4|C1QTNF1	9	0.0193511
positive regulation of cardiac muscle cell proliferation (GO:0060045)	biological_process	P1	GATA6|YAP1|ERBB4|BMPR1A|ZFPM2|MEF2C|TBX2|HEY2	8	0.0261465
viral transcription (GO:0019083)	biological_process	P1	RPS4Y1|TRIM21|RPS3A|TFAP4|RPL39|RPS3|RPL29|RPS16|NUCKS1|RPL35|RPS28|RPS13|RPL12|RPS4X|RPL18A|RPLP2|RPL36|RPS5|RPL8|RPL11|RPL10A|RPL6|RPS14|IFITM3|RPS24|RPS15|RPL23|MID2|RPL34|RPL28|RPL27A|MDFIC|RPL5|RPL9|RPS8|RPL14|RPL18|JUN|RPL41|RPLP1|TRIM8|RPS2|RPL27|RPS27|RPS29	45	1.2306e-10
regulation of renal system process (GO:0098801)	biological_process	P1	EMP2|NPR1|EDNRB|ADORA1|CORO2B|GAS6|F2R|STC1	8	0.0371677
regulation of cell-substrate adhesion (GO:0010810)	biological_process	P1	COL1A1|LGALS1|LIMS2|SMAD3|EMP2|SPOCK2|APOA1|LIMCH1|NEDD9|NPY2R|DOCK1|CDK6|RAC2|POSTN|PIK3R1|PDPN|BCL2|TACSTD2|FAM107A|CAMSAP3|RIN2|DDR1|ITGA6|CORO2B|VEGFA|FERMT1|VCL|MMP14|PLEKHA2|NID1|ITGA3|SLK|MIR503|EMILIN1|ACTN4|S100A10|JAG1|DAG1|CASK|PREX1|LRP1|IQGAP1|RAC1	43	5.93294e-07
ventricular septum morphogenesis (GO:0060412)	biological_process	P1	SOX4|ROBO1|BMPR2|FZD2|ZFPM2|SMAD7|HES1|TGFBR2|SOX11|HEY2	10	0.00984932
response to laminar fluid shear stress (GO:0034616)	biological_process	P1	ABCA1|ETS1|SMAD7|SREBF2|NFE2L2|ASS1|SMAD6	7	0.000870502
cardiac right ventricle morphogenesis (GO:0003215)	biological_process	P1	SOX4|GATA3|BMPR1A|ZFPM2|SMARCD3|PPP1R13L|HEY2|GATA4|JAG1	9	0.000389648
mononuclear cell differentiation (GO:1903131)	biological_process	P1	PATZ1|PLCL2|SOX4|DLL1|MR1|TMEM176B|GLI2|IL12B|LGALS1|CD28|DTX1|SOX13|ZFP36L2|CSF1R|RELB|TMEM176A|IFNE|ZFP36L1|CDK6|GATA3|NFKBID|INHA|IFI16|ZMIZ1|PIK3R1|PIR|NOTCH2|SMAD7|BCL2|ERBB2|LFNG|NDFIP1|FLT3|VEGFA|MMP14|PRDX2|GAS6|AXL|IL6R|TGFBR2|SH3RF1|B2M|MYH9|BCL3|SYK|TP53|JUN|PREX1|CMTM7|BAX|JAK3|CR1	52	0.006688
aorta development (GO:0035904)	biological_process	P1	SOX4|ROBO1|ADAMTS9|BMPR1A|HES1|TBX2|HEY2|NKX3-1|JAG1|SMAD6|LRP1	11	0.030482
positive regulation of pri-miRNA transcription by RNA polymerase II (GO:1902895)	biological_process	P1	ETS1|SMAD3|WT1|BMP2|GATA3|BMPR1A|SREBF2|TP53|FOXO3|SMAD6|JUN	11	0.0051104
developmental pigmentation (GO:0048066)	biological_process	P1	CD63|BLOC1S5|USP13|ZEB2|EDNRB|BCL2|CITED1|SOX10|MEF2C|HPS6|BAX	11	0.0104828
regulation of cellular response to vascular endothelial growth factor stimulus (GO:1902547)	biological_process	P1	SEMA6A|CCBE1|DLL1|ROBO1|CD63|IL12B|CADM4|ATP2B4|JCAD	9	0.00319551
regulation of smooth muscle cell migration (GO:0014910)	biological_process	P1	BMPR1A|POSTN|BCL2|PLXNA1|ITGA2|MEF2C|APEX1|PDGFA|NFE2L2|MIR503|GSTP1|LRP1|IQGAP1	13	0.0400873
endodermal cell differentiation (GO:0035987)	biological_process	P1	MMP2|COL5A2|GATA6|ITGAV|ITGB5|MMP15|COL5A1|COL4A2|MMP14|LAMA3	10	0.0321166
heart morphogenesis (GO:0003007)	biological_process	P1	SOX4|DLL1|ROBO1|BMPR2|FZD2|TWIST1|FAT4|INSR|GATA6|YAP1|SMAD3|NPY2R|BMP2|TNNI3|GATA3|BMPR1A|COL5A1|DHRS3|ZMIZ1|ZFPM2|NOTCH2|SMAD7|SMARCD3|VEGFA|SOX9|MEF2C|HES1|TBX2|TGFBR2|PPP1R13L|DSP|SOX11|HEY2|GATA4|TP53|JAG1|SMAD6|HEG1|OLFM1|MYLK2|CTNNB1|EXT1	42	1.73244e-05
regulation of extracellular matrix disassembly (GO:0010715)	biological_process	P1	ETS1|PDPN|DDR1|FSCN1|DDR2|LRP1	6	0.0262206
positive regulation of Notch signaling pathway (GO:0045747)	biological_process	P1	DLL1|ROBO1|MAML3|MAML1|ENHO|YAP1|ZMIZ1|MAML2|TSPAN5|HES1|FGF10|JAG1	12	0.0165984
regulation of leukocyte cell-cell adhesion (GO:1903037)	biological_process	P1	SIRPA|KLRK1|SOX4|VSIG4|GLI2|RPS3|IL12B|LGALS1|CD28|DTX1|SOX13|ETS1|ELANE|GATA3|TNFSF13B|NFKBID|PYCARD|PRNP|HSPD1|ZMIZ1|PIK3R1|SMAD7|ERBB2|NDFIP1|FYN|PRDX2|FUT9|HES1|TGFBR2|EFNB1|FLOT2|ASS1|CD47|SYK|NCK2|CXCL12|IGF2|JAK3|CR1|ST3GAL4|RAC1	41	0.0230751
pigment cell differentiation (GO:0050931)	biological_process	P1	CD63|BLOC1S5|USP13|ZEB2|EDNRB|BCL2|CITED1|SOX10|MEF2C|HPS6	10	0.00540687
mesenchymal cell proliferation (GO:0010463)	biological_process	P1	FAT4|LRP5|BMP2|BMPR1A|VEGFA|SOX9|TGFBR2|PDGFA|NFIB	9	0.0377527
positive regulation of Rho protein signal transduction (GO:0035025)	biological_process	P1	ROBO1|ARHGEF3|COL3A1|APOA1|F11R|F2R|LPAR4|ADGRG1|RAC1	9	0.0130106
metanephric epithelium development (GO:0072207)	biological_process	P1	WWTR1|FAT4|YAP1|WT1|LGR4|SOX9|HES1|LAMB2	8	0.0105854
endochondral bone growth (GO:0003416)	biological_process	P1	COL27A1|TSKU|SOX9|TGFBR2|ANXA6|DDR2|STC1|EXT1	8	0.00641684
bone growth (GO:0098868)	biological_process	P1	COL27A1|TSKU|SOX9|TGFBR2|ANXA6|DDR2|STC1|EXT1	8	0.0134508
ascending aorta morphogenesis (GO:0035910)	biological_process	P1	SOX4|HES1|HEY2	3	0.0341457
heparan sulfate proteoglycan metabolic process (GO:0030201)	biological_process	P1	EXTL2|NDST4|SGSH|B3GALT6|HS2ST1|GPC1|HS6ST1|GLCE|UGDH|CTNNB1|EXT1	11	0.000569041
response to fluid shear stress (GO:0034405)	biological_process	P1	ABCA1|ETS1|MTSS1|SMAD7|SREBF2|MEF2C|NFE2L2|ASS1|SMAD6	9	0.00860749
muscle tissue development (GO:0060537)	biological_process	P1	VGLL4|RGS4|TCF21|DLL1|NIBAN2|TWIST1|MAML1|MYL6|ARRB2|SIK1|GATA6|YAP1|ALPK3|ZFAND5|SMAD3|WT1|BMP2|TNNI3|MSC|ERBB3|ADAMTS9|ERBB4|BMPR1A|ZFPM2|SMAD7|BCL2|PPP3CA|BCL9L|GPC1|OBSL1|CDK5|VEGFA|SVIL|SOX9|MEF2C|TAFAZZIN|ATF3|TBX2|TGFBR2|PPP1R13L|DSP|SOX11|FHOD3|HEY2|NLN|GATA4|PGM5|IGF2|HEG1|MYLK2|CDON	51	0.000964849
positive regulation of extracellular matrix organization (GO:1903055)	biological_process	P1	COLGALT1|SMAD3|BMP2|PDPN|FSCN1|SOX9|DDR2|EMILIN1|DAG1	9	0.00127398
sulfur compound biosynthetic process (GO:0044272)	biological_process	P1	GGT1|B4GAT1|PAPSS1|CHPF|SCD|NDST4|CHST14|ACSL4|ST3GAL2|CNDP2|CHST11|GSTA1|B3GALT6|MTHFD1|CHST3|SLC35B2|B3GNT3|GGT6|PDHA1|VCAN|MGST3|GGT7|GSTO1|GLCE|UGDH|NFE2L2|ST3GAL6|CHSY1|B3GNT7|GSTM4|GSTP1|CHST9|B3GNT2|GSTA4|ST3GAL4|HPGDS|PDK3|EXT1	38	3.07971e-06
response to lead ion (GO:0010288)	biological_process	P1	PPP1CA|PLSCR1|CDK4|QDPR|SPARC|DNMT3A|CLDN1	7	0.0216832
protein targeting (GO:0006605)	biological_process	P1	RPS4Y1|RPS3A|RPL39|ECH1|RPS3|YWHAB|RPL29|RPS16|RPL35|TOMM40|RPS28|RPS13|TOMM40L|RPL12|NUCB1|RPS4X|RPL18A|RPLP2|RPL36|MGARP|RPS5|RPL8|RPL11|RPL10A|RAC2|PRNP|HSPD1|NOS2|ERBB2|RPL6|GIPC1|RPS14|FYN|CDK5|ADORA1|SREBF2|RPS24|RPS15|RPL23|ZDHHC15|AIP|RPL34|RPL28|RPL27A|HUWE1|NACAD|MIEF2|RPL5|RPL9|RPS8|TCAF1|RPL14|RPL18|CHMP4B|RPL41|RPLP1|PEX2|RPS2|RPL27|YIF1B|RPS27|TRAK1|RPS29	63	5.62519e-05
regulation of hydrogen peroxide metabolic process (GO:0010310)	biological_process	P1	RAC2|FYN|PRDX2|SNCA|ZNF205|RAC1	6	0.0341457
cellular response to transforming growth factor beta stimulus (GO:0071560)	biological_process	P1	HTRA3|WFIKKN2|AMHR2|PMEPA1|COL1A1|ARRB2|ZYX|SMAD5|ZFP36L2|COL3A1|DAB2|CHST11|SMAD3|ZFP36L1|ITGB5|USP9Y|BMPR1A|DAND5|POSTN|ZMIZ1|F11R|SMAD7|CITED1|BCL9L|GIPC1|FYN|FERMT1|NREP|COL4A2|SOX9|MEF2C|TGFBR2|ITGA3|SOX11|APPL1|LTBP3|EMILIN1|TP53|SMAD6|COL1A2|JUN|CLDN1|CILP|HIPK2|TGFBRAP1	45	5.37921e-06
basement membrane organization (GO:0071711)	biological_process	P1	COL4A1|PLOD3|NTNG1|FERMT1|NID1|NTNG2|LAMB2|NTN4|DAG1|NID2|EXT1	11	0.000410378
regulation of cellular response to growth factor stimulus (GO:0090287)	biological_process	P1	SEMA6A|HTRA3|WFIKKN2|FGFBP3|CCBE1|PMEPA1|DLL1|ROBO1|BMPR2|NIBAN2|CD63|IL12B|DSTYK|DAB2|CHST11|SMAD3|PCSK6|GATA3|DAND5|NOTCH2|SMAD7|CITED1|BCL9L|GPC1|CRIM1|GIPC1|FERMT1|NREP|GDF3|HES1|CADM4|TGFBR2|ITGA3|SOX11|FGF10|GATA4|MIR503|EMILIN1|TP53|SMAD6|CASK|HIPK2|ATP2B4|JCAD	44	0.000438728
cellular response to interferon-alpha (GO:0035457)	biological_process	P1	GATA3|IFIT3|IFNAR1|GAS6|AXL|IFIT2	6	0.00256329
regulation of axon extension involved in axon guidance (GO:0048841)	biological_process	P1	SEMA6A|BMPR2|SEMA4C|SEMA6B|VEGFA|SEMA7A|CXCL12|SEMA4B	8	0.0439491
dendritic spine maintenance (GO:0097062)	biological_process	P1	IGF1R|INSR|PRNP|APOE|TANC1|FYN|ITGA3|ZMYND8	8	0.0025036
positive regulation of skeletal muscle tissue development (GO:0048643)	biological_process	P1	DLL1|NIBAN2|BCL2|MEF2C|IGF2|CDON	6	0.0431013
collagen-activated signaling pathway (GO:0038065)	biological_process	P1	COL4A1|COL1A1|DDR1|ITGA2|COL4A2|DDR2|SYK	7	0.00226963
developmental growth involved in morphogenesis (GO:0060560)	biological_process	P1	NDN|SEMA6A|DPYSL2|TNN|BMPR2|SEMA4C|DCLK1|YAP1|SEMA6B|NRCAM|TWF2|SYT1|LLPH|APOE|POSTN|RASAL1|MED12|PLXNA1|DDR1|CDK5|VEGFA|VCL|SOX9|SYT2|TBX2|MAG|TGFBR2|EPHA7|CPNE5|CXCR4|FLRT1|FGF10|LAMB2|SEMA7A|CXCL12|OLFM1|SEMA4B|LRP1|IQGAP1|CTNNB1|EXT1	41	1.28698e-05
regulation of developmental growth (GO:0048638)	biological_process	P1	SEMA6A|VGLL4|RGS4|DPYSL2|PPIB|DLL1|CDKN1B|BMPR2|SEMA4C|INSR|GATA6|YAP1|SEMA6B|NRCAM|TWF2|WT1|SYT1|ERBB4|BMPR1A|APOE|RAI1|RASAL1|ZFPM2|SMAD7|BCL2|FTO|CDK5|VEGFA|MEF2C|CDK4|SYT2|TBX2|MAG|TGFBR2|EPHA7|CPNE5|CXCR4|HEY2|SEMA7A|CXCL12|IGF2|OLFM1|WWC1|SEMA4B|LRP1	45	0.00165342
aorta morphogenesis (GO:0035909)	biological_process	P1	SOX4|ADAMTS9|BMPR1A|HES1|TBX2|HEY2|JAG1|LRP1	8	0.0261465
aortic valve morphogenesis (GO:0003180)	biological_process	P1	ROBO1|TWIST1|GATA3|SOX9|HEY2|GATA4|EMILIN1|JAG1|SMAD6	9	0.0105779
regulation of homotypic cell-cell adhesion (GO:0034110)	biological_process	P1	LGALS1|PRKCA|RDX|PDPN|F11R|CD9|SYK|C1QTNF1	8	0.0134508
regulation of lymphocyte activation (GO:0051249)	biological_process	P1	SIRPA|KLRK1|SOX4|VSIG4|GLI2|FGR|RPS3|IL12B|LGALS1|CD28|DTX1|SOX13|ZFP36L2|TICAM1|ZFP36L1|SH3KBP1|GATA3|CD38|TNFSF13B|NFKBID|PYCARD|RAC2|INHA|PRNP|HSPD1|ZMIZ1|PIK3R1|SMAD7|BCL2|ERBB2|NDFIP1|PKN1|FYN|MEF2C|MMP14|PRDX2|GAS6|HES1|AXL|TGFBR2|SH3RF1|SOX11|EFNB1|FGF10|FLOT2|CD47|SHLD1|SYK|NCK2|CD22|IGF2|JAK3|CR1|EXOSC6|TLR4|RAC1	56	0.0341457
cardiac chamber formation (GO:0003207)	biological_process	P1	SOX4|BMP2|SMARCD3|MEF2C|TBX2|SOX11	6	0.00431829
receptor catabolic process (GO:0032801)	biological_process	P1	CAPN1|ZNRF3|MVB12A|RNF43|APOE|GPRASP1|CDK5|DTX3L|VLDLR	9	0.0278537
lymph vessel development (GO:0001945)	biological_process	P1	PTPN14|CCBE1|BMPR2|EPHA2|PDPN|VEGFA|SYK|HEG1	8	0.0134508
negative regulation of viral life cycle (GO:1903901)	biological_process	P1	IFITM2|GSN|LY6E|IFITM3|MID2|PPIA|IFITM1|TRIM8	8	0.00836008
response to lipoprotein particle (GO:0055094)	biological_process	P1	ABCA1|TICAM1|APOE|SREBF2|LDLR|CD9|SYK|TLR4	8	0.0371677
cellular response to lipoprotein particle stimulus (GO:0071402)	biological_process	P1	ABCA1|TICAM1|APOE|SREBF2|LDLR|CD9|SYK|TLR4	8	0.0439491
membrane biogenesis (GO:0044091)	biological_process	P1	EPHB2|EMP2|NLGN2|CEL|PTPRD|SERINC1|FLOT2|S100A10|CLIP3|NLGN4Y|SYT11	11	0.00618866
chondroitin sulfate biosynthetic process (GO:0030206)	biological_process	P1	CHPF|CHST11|B3GALT6|CHST3|VCAN|UGDH|CHSY1|CHST9	8	0.0105854
outflow tract septum morphogenesis (GO:0003148)	biological_process	P1	ROBO1|BMPR2|GATA6|BMPR1A|ZFPM2|TBX2|TGFBR2|SMAD6	8	0.0105854
chondroitin sulfate proteoglycan biosynthetic process (GO:0050650)	biological_process	P1	CHPF|CHST11|B3GALT6|CHST3|VCAN|UGDH|CHSY1|CHST9	8	0.0314541
regulation of striated muscle tissue development (GO:0016202)	biological_process	P1	DLL1|NIBAN2|TWIST1|SMAD3|ERBB3|BCL2|MEF2C|IGF2|CDON	9	0.0438437
response to gonadotropin-releasing hormone (GO:0097210)	biological_process	P1	GNRHR|MGARP|NR5A1|CRHBP	4	0.0225863
T cell activation (GO:0042110)	biological_process	P1	PATZ1|SIRPA|KLRK1|SOX4|MSN|GSN|MR1|VSIG4|GLI2|RPS3|IL12B|LGALS1|CD28|DTX1|SOX13|APBB1IP|ZFP36L2|RELB|SMAD3|IFNE|ZFP36L1|GATA3|TNFSF13B|NFKBID|PYCARD|RAC2|PRNP|HSPD1|ZMIZ1|PIK3R1|SMAD7|BCL2|PPP3CA|ERBB2|LFNG|NDFIP1|FYN|PRDX2|HES1|IL6R|TGFBR2|SH3RF1|B2M|EFNB1|FLOT2|CD47|MYH9|BCL3|SYK|TP53|NCK2|IGF2|PREX1|BAX|JAK3|CR1|ELF4|RAC1	58	0.00644291
collagen-activated tyrosine kinase receptor signaling pathway (GO:0038063)	biological_process	P1	COL4A1|COL1A1|DDR1|COL4A2|DDR2|SYK	6	0.00431829
chondrocyte development (GO:0002063)	biological_process	P1	BMPR2|COL27A1|TSKU|SERPINH1|CHST11|SMAD7|SOX9|TGFBR2|CHSY1	9	0.00539211
melanocyte differentiation (GO:0030318)	biological_process	P1	USP13|ZEB2|EDNRB|BCL2|CITED1|SOX10|MEF2C|HPS6	8	0.00836008
diaphragm development (GO:0060539)	biological_process	P1	TCF21|WT1|MSC|ASS1	4	0.0367763
positive regulation of protein maturation (GO:1903319)	biological_process	P1	SOX4|CCBE1|GSN|MMP14|ENO1|PLGRKT|MYH9	7	0.0416372
negative regulation of macrophage activation (GO:0043031)	biological_process	P1	CD200|VSIG4|LRFN5|LDLR|GRN|SYT11	6	0.0431013
nephron tubule epithelial cell differentiation (GO:0072160)	biological_process	P1	WWTR1|FAT4|YAP1|GATA3|MTSS1|MEF2C|CTNNB1	7	0.000870502
cell fate determination (GO:0001709)	biological_process	P1	DLL1|NKX6-3|GATA6|GATA3|NOTCH2|MEF2C|HES1|TBX2|PTCH2|JAG1	10	0.0200666
sialylation (GO:0097503)	biological_process	P1	ST6GALNAC1|ST8SIA5|ST3GAL2|ST6GALNAC4|ST3GAL6|ST3GAL4	6	0.0431013
growth plate cartilage development (GO:0003417)	biological_process	P1	COL27A1|TSKU|SOX9|TGFBR2|ANXA6|STC1	6	0.0139503
cellular response to epidermal growth factor stimulus (GO:0071364)	biological_process	P1	COL1A1|ZFP36L2|ZFP36L1|TDGF1|ERBB4|ERBB2|SOX9|EEF1A1|GSTP1|IQGAP1	10	0.0237033
response to epidermal growth factor (GO:0070849)	biological_process	P1	COL1A1|ZFP36L2|ZFP36L1|TDGF1|ERBB4|ERBB2|SOX9|EEF1A1|GSTP1|IQGAP1	10	0.0419675
cardiac muscle tissue regeneration (GO:0061026)	biological_process	P1	CDKN1B|YAP1|ERBB4|GATA4	4	0.0367763
cell differentiation involved in metanephros development (GO:0072202)	biological_process	P1	WWTR1|TCF21|FAT4|YAP1|LGR4|CITED1|LAMB2	7	0.0416372
lymphocyte aggregation (GO:0071593)	biological_process	P1	MSN|RAC2|STK10|JAM2	4	0.00530233
positive regulation of cell adhesion (GO:0045785)	biological_process	P1	SIRPA|KLRK1|SOX4|ZFHX3|GLI2|RPS3|IL12B|LGALS1|CD28|SOX13|ETS1|PRKCA|APBB1IP|LIMS2|SMAD3|EMP2|SPOCK2|APOA1|ELANE|NEDD9|ITGAV|NPY2R|DOCK1|CDK6|GATA3|TNFSF13B|NFKBID|PYCARD|HSPD1|ZMIZ1|PIK3R1|PDPN|F11R|SMAD7|PPP3CA|ERBB2|RIN2|ITGA2|FYN|ITGA6|VEGFA|FERMT1|PLEKHA2|NID1|HES1|TGFBR2|ITGA3|EFNB1|FLOT2|CD47|EMILIN1|S100A10|SYK|DAG1|NCK2|CXCL12|IGF2|PREX1|JAK3|CR1|ST3GAL4|ADGRG1|IQGAP1|RAC1	64	8.74658e-06
muscle organ development (GO:0007517)	biological_process	P1	FLNB|ZFHX3|TCF21|DLL1|FZD2|NIBAN2|TWIST1|MYL6|SMAD3|ARID5B|LAMA2|TCF23|WT1|BMP2|TNNI3|CNTFR|SPEG|MSC|ERBB3|BMPR1A|MRAS|ZFPM2|SMAD7|BCL2|PPP3CA|SGCE|BCL9L|GPC1|CDK5|SVIL|ID3|MEF2C|TAFAZZIN|ATF3|DSP|SOX11|HEY2|ASS1|NLN|CTF1|DMD|DAG1|IGF2|HEG1|MYLK2|CDON	46	0.000729179
positive regulation of developmental pigmentation (GO:0048087)	biological_process	P1	BLOC1S5|ZEB2|BCL2|BAX	4	0.0367763
negative regulation of neuron migration (GO:2001223)	biological_process	P1	TNN|COL3A1|ERBB4|ADGRG1	4	0.0367763
mature B cell differentiation (GO:0002335)	biological_process	P1	PLCL2|DLL1|LGALS1|NOTCH2|LFNG|BCL3|CMTM7|CR1	8	0.0371677
positive regulation of male gonad development (GO:2000020)	biological_process	P1	WT1|SRY|ZFPM2|SOX9|NR5A1	5	0.00766189
positive regulation of gonad development (GO:1905941)	biological_process	P1	WT1|SRY|ZFPM2|SOX9|NR5A1	5	0.0124257
regulation of male gonad development (GO:2000018)	biological_process	P1	WT1|SRY|ZFPM2|SOX9|NR5A1	5	0.0124257
regulation of gonad development (GO:1905939)	biological_process	P1	WT1|SRY|ZFPM2|SOX9|NR5A1	5	0.0390063
basement membrane assembly (GO:0070831)	biological_process	P1	PLOD3|NTNG1|NTNG2|LAMB2|NTN4|DAG1	6	0.0139503
regulation of neurogenesis (GO:0050767)	biological_process	P1	SEMA6A|EPHB2|DLL1|ROBO1|BMPR2|SEMA4C|PTPRZ1|YWHAH|YAP1|SEMA6B|TWF2|SERPINF1|BMP2|PRPF19|BMPR1A|PPP3CA|PLXNA1|SMARCD3|OBSL1|CDK5|SOX10|LDLR|VEGFA|HES1|MAG|CAMK2B|PTPRD|EPHA7|CXCR4|SOX11|B2M|HEY2|SEMA7A|TP53|CTNNA1|DAG1|CXCL12|SEMA4B|LRP1|CTNNB1|PLXNC1|SPINT1	42	0.0345864
phospholipid efflux (GO:0033700)	biological_process	P1	APOC1|ABCA1|APOA1|APOE|ABCG1	5	0.0390063
chondrocyte development involved in endochondral bone morphogenesis (GO:0003433)	biological_process	P1	COL27A1|TSKU|SERPINH1|SOX9|TGFBR2	5	0.00422136
renal system process involved in regulation of blood volume (GO:0001977)	biological_process	P1	EMP2|ADORA1|HSD11B2|CORO2B|GAS6|F2R	6	0.00984845
sex determination (GO:0007530)	biological_process	P1	TCF21|INSRR|AMH|WT1|SRY|SOX9|NR5A1	7	0.00965519
glutathione derivative biosynthetic process (GO:1901687)	biological_process	P1	GSTA1|MGST3|GSTO1|GSTM4|GSTP1|GSTA4|HPGDS	7	0.0168883
glutathione derivative metabolic process (GO:1901685)	biological_process	P1	GSTA1|MGST3|GSTO1|GSTM4|GSTP1|GSTA4|HPGDS	7	0.0168883
insulin-like growth factor receptor signaling pathway (GO:0048009)	biological_process	P1	IRS1|IGFBP4|IGF1R|BMP2|PIK3R1|CRIM1|NKX3-1|CDH3|CILP	9	0.0193511
negative regulation of female gonad development (GO:2000195)	biological_process	P1	WT1|ZFPM2|NR5A1	3	0.01176
negative regulation of gonad development (GO:1905940)	biological_process	P1	WT1|ZFPM2|NR5A1	3	0.0341457
glial cell differentiation (GO:0010001)	biological_process	P1	SOX4|GSN|DLL1|PTPRZ1|DTX1|SOX13|PHGDH|LAMA2|BMP2|CDK6|ERBB3|C1QA|PRPF19|MED12|GPR157|ERBB2|MYRF|BACE2|GPC1|CDK5|SOX10|LDLR|GRN|SOX9|HES1|MAG|CXCR4|SOX11|FGF10|LAMB2|NFIB|DAG1|NCMAP|GSTP1|LRP1|TLR4|VIM|SPINT1	38	3.58247e-05
amide biosynthetic process (GO:0043604)	biological_process	P1	EEF1A1P5|GGT1|SOX4|RPS4Y1|RPS3A|MOV10|RPL39|SCD|PPP1CA|HSPB1|RPS3|RPL29|RPS16|CD28|PDF|ACSL4|ST3GAL2|ZFP36L2|RPL35|CNDP2|ST6GALNAC4|ELANE|RPS28|RPS13|LARP6|RPL12|RPS4X|ZFP36L1|GRB7|RPL18A|RPLP2|RPL36|RPS5|RPL8|RPL11|RPL10A|ABCA8|GADD45GIP1|ANG|ERBB2|EIF2AK2|COA3|CERS4|SHMT2|FTO|CTIF|RPL6|MRPL16|RPS14|ITGA2|MRPL15|GGT6|PDHA1|RPS24|RPS15|EEF1A1|MRPS26|CDK4|GGT7|RPL23|TNIP1|RPL34|RPL28|NFE2L2|RPL27A…	91	0.0156773
epithelial cell-cell adhesion (GO:0090136)	biological_process	P1	SERPINB8|ITGB5|CAMSAP3|VCL|DSP|CTNNA1	6	0.0262206
regulation of skeletal muscle tissue development (GO:0048641)	biological_process	P1	DLL1|NIBAN2|TWIST1|BCL2|MEF2C|IGF2|CDON	7	0.0416372
positive regulation of muscle organ development (GO:0048636)	biological_process	P1	DLL1|NIBAN2|ERBB3|BCL2|MEF2C|IGF2|CDON	7	0.0216832
positive regulation of striated muscle tissue development (GO:0045844)	biological_process	P1	DLL1|NIBAN2|ERBB3|BCL2|MEF2C|IGF2|CDON	7	0.0216832
positive regulation of muscle tissue development (GO:1901863)	biological_process	P1	DLL1|NIBAN2|ERBB3|BCL2|MEF2C|IGF2|CDON	7	0.0276862
chondrocyte differentiation involved in endochondral bone morphogenesis (GO:0003413)	biological_process	P1	COL27A1|TSKU|SERPINH1|SOX9|TGFBR2|ANXA6	6	0.00984845
synaptic membrane adhesion (GO:0099560)	biological_process	P1	NTNG1|MDGA1|LRRC4C|LRFN3|LRFN5|NTNG2|PTPRD|PTPRF	8	0.0105854
melanin metabolic process (GO:0006582)	biological_process	P1	OPN3|ZEB2|BCL2|CITED1|GIPC1|APPL1|CDH3	7	0.0216832
chylomicron remnant clearance (GO:0034382)	biological_process	P1	APOC1|APOE|LDLR|APOB	4	0.0225863
triglyceride-rich lipoprotein particle clearance (GO:0071830)	biological_process	P1	APOC1|APOE|LDLR|APOB	4	0.0225863
regulation of platelet aggregation (GO:0090330)	biological_process	P1	PRKCA|PDPN|F11R|CD9|SYK|C1QTNF1	6	0.0431013
regulation of vascular endothelial growth factor signaling pathway (GO:1900746)	biological_process	P1	SEMA6A|CCBE1|DLL1|ROBO1|CD63|IL12B|CADM4|JCAD	8	0.00836008
negative regulation of viral entry into host cell (GO:0046597)	biological_process	P1	IFITM2|GSN|LY6E|IFITM3|MID2|IFITM1|TRIM8	7	0.0127579
limb bud formation (GO:0060174)	biological_process	P1	ZNF219|SOX4|SOX9|SOX11|FGF10	5	0.0193511
exocrine system development (GO:0035272)	biological_process	P1	PLXNA1|IGSF3|SOX10|SOX9|PDGFA|FGF10|NKX3-1|NTN4|DAG1|IGF2	10	0.0200666
metanephric nephron epithelium development (GO:0072243)	biological_process	P1	WWTR1|FAT4|YAP1|LGR4|SOX9|HES1|LAMB2	7	0.0216832
osteoblast development (GO:0002076)	biological_process	P1	TNN|GLI2|ACHE|LRP5|SMAD3|LIMD1	6	0.0262206
glomerular visceral epithelial cell differentiation (GO:0072112)	biological_process	P1	WT1|NOTCH2|LAMB2|JAG1|IQGAP1|EXT1	6	0.0431013
renal filtration cell differentiation (GO:0061318)	biological_process	P1	WT1|NOTCH2|LAMB2|JAG1|IQGAP1|EXT1	6	0.0431013
mitral valve development (GO:0003174)	biological_process	P1	SOX4|BMPR2|TWIST1|BMPR1A|SMAD6	5	0.0124257
mitral valve morphogenesis (GO:0003183)	biological_process	P1	SOX4|BMPR2|TWIST1|BMPR1A|SMAD6	5	0.0124257
protein targeting to ER (GO:0045047)	biological_process	P1	RPS4Y1|RPS3A|RPL39|RPS3|RPL29|RPS16|RPL35|RPS28|RPS13|RPL12|RPS4X|RPL18A|RPLP2|RPL36|RPS5|RPL8|RPL11|RPL10A|RPL6|RPS14|RPS24|RPS15|RPL23|RPL34|RPL28|RPL27A|RPL5|RPL9|RPS8|RPL14|RPL18|CHMP4B|RPL41|RPLP1|RPS2|RPL27|RPS27|RPS29	38	1.8085e-12
establishment of protein localization to endoplasmic reticulum (GO:0072599)	biological_process	P1	RPS4Y1|RPS3A|RPL39|RPS3|RPL29|RPS16|RPL35|RPS28|RPS13|RPL12|RPS4X|RPL18A|RPLP2|RPL36|RPS5|RPL8|RPL11|RPL10A|RPL6|RPS14|RPS24|RPS15|RPL23|RPL34|RPL28|RPL27A|RPL5|RPL9|RPS8|RPL14|RPL18|CHMP4B|RPL41|RPLP1|RPS2|RPL27|RPS27|RPS29	38	4.96277e-12
protein localization to endoplasmic reticulum (GO:0070972)	biological_process	P1	RPS4Y1|RPS3A|RPL39|RPS3|RPL29|RPS16|RPL35|RPS28|RPS13|RPL12|RPS4X|RPL18A|RPLP2|RPL36|RPS5|RPL8|RPL11|RPL10A|RPL6|RPS14|RPS24|RPS15|RPL23|RPL34|RPL28|RPL27A|RPL5|RPL9|RPS8|RPL14|RPL18|CHMP4B|RPL41|RPLP1|RPS2|RPL27|RPS27|RPS29	38	3.33418e-09
regulation of small GTPase mediated signal transduction (GO:0051056)	biological_process	P1	EPHB2|ARHGAP22|RHOC|ROBO1|ARHGEF3|ARAP2|FBP1|ABCA1|COL3A1|RDX|APOA1|OPHN1|ARHGAP1|ARHGEF16|STMN3|RAC2|MAPRE2|ARHGAP24|APOE|TRIO|RASAL1|NOTCH2|F11R|CGNL1|PLCE1|VAV2|SIPA1|RHOG|NGEF|CADM4|F2R|ITGA3|PSD4|FGF10|SYDE1|ARHGAP42|HEG1|PREX1|RHOBTB2|LPAR4|ADGRG1|CDON|RAC1	43	0.00569133
regulation of glomerular filtration (GO:0003093)	biological_process	P1	EMP2|ADORA1|CORO2B|GAS6|F2R	5	0.00766189
maintenance of blood-brain barrier (GO:0035633)	biological_process	P1	ACTB|LSR|LAMA2|F11R|VEGFA|VCL|JAM2|DMD|CLDN1	9	0.0130106
regulation of nephron tubule epithelial cell differentiation (GO:0072182)	biological_process	P1	WWTR1|FAT4|YAP1|GATA3|CTNNB1	5	0.0193511
leukotriene biosynthetic process (GO:0019370)	biological_process	P1	GGT1|PLA2G1B|GGT6|MGST3|GGT7|SYK	6	0.0431013
peptide biosynthetic process (GO:0043043)	biological_process	P1	EEF1A1P5|GGT1|SOX4|RPS4Y1|RPS3A|MOV10|RPL39|PPP1CA|HSPB1|RPS3|RPL29|RPS16|CD28|PDF|ZFP36L2|RPL35|CNDP2|ELANE|RPS28|RPS13|LARP6|RPL12|RPS4X|ZFP36L1|GRB7|RPL18A|RPLP2|RPL36|RPS5|RPL8|RPL11|RPL10A|GADD45GIP1|ANG|ERBB2|EIF2AK2|COA3|SHMT2|FTO|CTIF|RPL6|MRPL16|RPS14|ITGA2|MRPL15|GGT6|RPS24|RPS15|EEF1A1|MRPS26|CDK4|GGT7|RPL23|TNIP1|RPL34|RPL28|NFE2L2|RPL27A|N6AMT1|MRPL23|MIR503|RPL5|BCL3|RPL9|RPS8|DMD|F…	79	0.0141384
negative regulation of peptidyl-cysteine S-nitrosylation (GO:1902083)	biological_process	P1	NCOA7|DMD|SNTA1|ATP2B4	4	0.0225863
epithelial cell proliferation involved in renal tubule morphogenesis (GO:2001013)	biological_process	P1	LGR4|MTSS1|MEF2C	3	0.0341457
mRNA catabolic process (GO:0006402)	biological_process	P1	LSM7|RPS4Y1|RPS3A|MOV10|RPL39|ZC3HAV1|HSPB1|RPS3|YWHAB|RPL29|CSDC2|RPS16|ANP32A|PPP2R1A|RNASEL|PRKCA|ZFP36L2|RPL35|RPS28|RPS13|RPL12|RPS4X|ZFP36L1|RPL18A|NBDY|RPLP2|RPL36|RPS5|RPL8|RPL11|RPL10A|HELZ2|FTO|CTIF|RPL6|RPS14|ZHX2|RPS24|RPS15|APEX1|RPL23|RPL34|RPL28|RPL27A|RPL5|RPL9|PSME1|RPS8|RPL14|RPL18|RPL41|RPLP1|RPS2|RPL27|EXOSC6|VIM|RPS27|RPS29	58	1.31029e-05
RNA catabolic process (GO:0006401)	biological_process	P1	LSM7|RPS4Y1|RPS3A|MOV10|RPL39|ZC3HAV1|HSPB1|RPS3|YWHAB|RPL29|CSDC2|RPS16|ANP32A|PPP2R1A|RNASEL|PRKCA|ZFP36L2|RPL35|RPS28|RPS13|RPL12|RPS4X|ZFP36L1|RPL18A|NBDY|RPLP2|RPL36|RPS5|RPL8|RPL11|RPL10A|HELZ2|FTO|CTIF|RPL6|RPS14|ZHX2|RPS24|RPS15|APEX1|RPL23|RPL34|RPL28|RPL27A|RPL5|RPL9|PSME1|RPS8|RPL14|RPL18|RPL41|RPLP1|RPS2|RPL27|EXOSC6|VIM|RPS27|RPS29	58	0.000227178
nucleobase-containing compound catabolic process (GO:0034655)	biological_process	P1	LSM7|H1-0|RPS4Y1|RPS3A|MOV10|RPL39|ZC3HAV1|HSPB1|RPS3|YWHAB|RPL29|CSDC2|RPS16|ANP32A|PPP2R1A|RNASEL|PRKCA|ZFP36L2|RPL35|RPS28|RPS13|RPL12|RPS4X|ZFP36L1|RPL18A|NBDY|RPLP2|RPL36|DPYD|RPS5|RPL8|RPL11|RPL10A|DCTPP1|DNASE2|HELZ2|FTO|CTIF|RPL6|AMPD3|RPS14|DFFA|PDE4D|ZHX2|RPS24|RPS15|APEX1|RPL23|RPL34|RPL28|RPL27A|APOBEC3F|RPL5|RPL9|PSME1|RPS8|RPL14|RPL18|RPL41|RPLP1|RPS2|RPL27|BAX|EXOSC6|VIM|RPS27|RPS29	67	0.00314676
tricuspid valve morphogenesis (GO:0003186)	biological_process	P1	BMPR2|BMPR1A|TGFBR2|HEY2	4	0.00530233
growth plate cartilage chondrocyte differentiation (GO:0003418)	biological_process	P1	COL27A1|TSKU|SOX9|TGFBR2|ANXA6	5	0.00766189
tricuspid valve development (GO:0003175)	biological_process	P1	BMPR2|BMPR1A|TGFBR2|HEY2	4	0.0118811
regulation of epithelial cell differentiation involved in kidney development (GO:2000696)	biological_process	P1	WWTR1|FAT4|YAP1|GATA3|CITED1|CTNNB1	6	0.0194391
detection of stimulus involved in sensory perception of pain (GO:0062149)	biological_process	P1	PHF24|ARRB2|ITGA2|FYN|ADORA1|CXCR4|CXCL12	7	0.0341457
ciliary body morphogenesis (GO:0061073)	biological_process	P1	TSKU|NOTCH2|JAG1	3	0.0341457
hippo signaling (GO:0035329)	biological_process	P1	VGLL4|WWTR1|YWHAB|FAT4|AJUBA|YAP1|AMOTL2|SOX11|WWC1|LIMD1	10	0.0366824
regulation of angiogenesis (GO:0045765)	biological_process	P1	SEMA6A|DDAH1|CCBE1|DLL1|HSPB1|NIBAN2|TWIST1|FOXJ2|ANXA3|GATA6|ETS1|PRKCA|EMP2|NPR1|SERPINF1|EPHA2|ADAMTS9|ERBB2|EGLN1|RAPGEF3|VEGFA|CEMIP2|GRN|STAB1|COL4A2|PRKD1|TGFBR2|CHI3L1|NFE2L2|CXCR4|SPARC|GATA4|MIR503|EMILIN1|ADGRB2|CYBB|HIPK2|CTNNB1|ATP2B4|JCAD	40	0.018893
regulation of vasculature development (GO:1901342)	biological_process	P1	SEMA6A|DDAH1|CCBE1|DLL1|HSPB1|NIBAN2|TWIST1|FOXJ2|ANXA3|GATA6|ETS1|PRKCA|EMP2|NPR1|SERPINF1|EPHA2|ADAMTS9|ERBB2|EGLN1|RAPGEF3|VEGFA|CEMIP2|GRN|STAB1|COL4A2|PRKD1|TGFBR2|CHI3L1|NFE2L2|CXCR4|SPARC|GATA4|MIR503|EMILIN1|ADGRB2|CYBB|HIPK2|CTNNB1|ATP2B4|JCAD	40	0.0242652
mesenchyme development (GO:0060485)	biological_process	P1	SEMA6A|WWTR1|TCF21|ROBO1|BMPR2|SEMA4C|TWIST1|COL1A1|AMH|YAP1|DAB2|SEMA6B|SMAD3|ZFP36L1|GLIPR2|WT1|BMP2|GATA3|ERBB3|ERBB4|BMPR1A|DAND5|EDNRB|LOXL2|ZFPM2|PDPN|SMAD7|BCL2|BCL9L|NRTN|SOX10|SOX9|MEF2C|HES1|TBX2|TGFBR2|ANXA6|AMER1|SOX11|EFNB1|FGF10|HEY2|SEMA7A|GATA4|JAG1|DAG1|OLFM1|SEMA4B|CTNNB1|EXT1	50	2.894e-06
heparan sulfate proteoglycan biosynthetic process (GO:0015012)	biological_process	P1	EXTL2|NDST4|B3GALT6|HS2ST1|HS6ST1|GLCE|UGDH|CTNNB1|EXT1	9	0.00234359
muscle cell differentiation (GO:0042692)	biological_process	P1	WFIKKN2|RGS4|DLL1|NIBAN2|SEMA4C|MAML1|ARRB2|SIK1|GATA6|ALPK3|TCF23|WT1|BMP2|SPEG|EDNRB|OLFM2|BCL2|PPP3CA|SMARCD3|OBSL1|TANC1|PLD3|CHRNB1|VEGFA|CD9|SOX9|MEF2C|MMP14|SYPL2|HES1|TBX2|PTGFRN|JAM2|FGF10|FHOD3|HEY2|NLN|GATA4|MYH9|PGM5|DMD|CTNNA1|KRT8|IGF2|CTNNB1|CDON	46	0.00767605
regulation of nervous system development (GO:0051960)	biological_process	P1	SEMA6A|EPHB2|DLL1|ROBO1|BMPR2|SEMA4C|PTPRZ1|YWHAH|YAP1|SEMA6B|TWF2|SERPINF1|BMP2|NLGN2|PRPF19|BMPR1A|PPP3CA|SLITRK6|PLXNA1|MYRF|SMARCD3|OBSL1|CDK5|SOX10|LDLR|VEGFA|HES1|MAG|CAMK2B|PTPRD|EPHA7|CXCR4|SOX11|B2M|JAM2|HEY2|AMIGO2|SEMA7A|OXTR|EPHB3|TP53|CTNNA1|DAG1|CXCL12|NCMAP|SEMA4B|CLSTN3|LRP1|CLSTN1|CTNNB1|PLXNC1|SPINT1	52	0.00973926
heart valve formation (GO:0003188)	biological_process	P1	TWIST1|SOX9|HEY2|GATA4|OLFM1	5	0.0283921
common bile duct development (GO:0061009)	biological_process	P1	NOTCH2|SOX9|HES1	3	0.0341457
positive regulation of melanin biosynthetic process (GO:0048023)	biological_process	P1	OPN3|ZEB2|GIPC1|APPL1|CDH3	5	0.00199456
positive regulation of secondary metabolite biosynthetic process (GO:1900378)	biological_process	P1	OPN3|ZEB2|GIPC1|APPL1|CDH3	5	0.00199456
regulation of melanin biosynthetic process (GO:0048021)	biological_process	P1	OPN3|ZEB2|GIPC1|APPL1|CDH3	5	0.0283921
regulation of secondary metabolic process (GO:0043455)	biological_process	P1	OPN3|ZEB2|GIPC1|APPL1|CDH3	5	0.0283921
regulation of secondary metabolite biosynthetic process (GO:1900376)	biological_process	P1	OPN3|ZEB2|GIPC1|APPL1|CDH3	5	0.0283921
SRP-dependent cotranslational protein targeting to membrane (GO:0006614)	biological_process	P1	RPS4Y1|RPS3A|RPL39|RPS3|RPL29|RPS16|RPL35|RPS28|RPS13|RPL12|RPS4X|RPL18A|RPLP2|RPL36|RPS5|RPL8|RPL11|RPL10A|RPL6|RPS14|RPS24|RPS15|RPL23|RPL34|RPL28|RPL27A|RPL5|RPL9|RPS8|RPL14|RPL18|RPL41|RPLP1|RPS2|RPL27|RPS27|RPS29	37	1.11667e-13
nuclear-transcribed mRNA catabolic process, nonsense-mediated decay (GO:0000184)	biological_process	P1	RPS4Y1|RPS3A|RPL39|RPS3|RPL29|RPS16|PPP2R1A|RPL35|RPS28|RPS13|RPL12|RPS4X|RPL18A|RPLP2|RPL36|RPS5|RPL8|RPL11|RPL10A|HELZ2|CTIF|RPL6|RPS14|RPS24|RPS15|RPL23|RPL34|RPL28|RPL27A|RPL5|RPL9|RPS8|RPL14|RPL18|RPL41|RPLP1|RPS2|RPL27|RPS27|RPS29	40	1.88571e-13
cotranslational protein targeting to membrane (GO:0006613)	biological_process	P1	RPS4Y1|RPS3A|RPL39|RPS3|RPL29|RPS16|RPL35|RPS28|RPS13|RPL12|RPS4X|RPL18A|RPLP2|RPL36|RPS5|RPL8|RPL11|RPL10A|RPL6|RPS14|RPS24|RPS15|RPL23|RPL34|RPL28|RPL27A|RPL5|RPL9|RPS8|RPL14|RPL18|RPL41|RPLP1|RPS2|RPL27|RPS27|RPS29	37	5.13154e-13
response to wounding (GO:0009611)	biological_process	P1	EPHB2|CCR1|GNG2|RHOC|IRF2|GSN|HSPB1|TRPC3|ACTB|TSKU|PLLP|C1GALT1C1|COL1A1|MYL12A|AJUBA|TLN1|LGALS1|ARRB2|GATA6|YAP1|PLSCR1|ETS1|PRKCA|ZFP36L2|COL3A1|SMAD3|APOA1|ZFP36L1|DOCK1|PRKAR2B|GATA3|ERBB3|STK24|DPYSL3|ANO6|TNFRSF12A|GP1BA|COL5A1|ARHGAP24|APOE|POSTN|GNA14|ZFPM2|PIK3R1|PDPN|NOTCH2|F11R|BCL2|PPP3CA|ERBB2|PROCR|DDR1|ITGA2|FYN|CDK5|VAV2|VEGFA|CD9|GRN|FERMT1|NREP|ID3|VCL|DCBLD2|PRDX2|GAS6|AXL|CA…	104	2.97118e-11
regulation of cell adhesion (GO:0030155)	biological_process	P1	SEMA6A|CDH1|SIRPA|KLRK1|SOX4|ZFHX3|GSN|DLL1|VSIG4|GLI2|RPS3|COL1A1|IL12B|LGALS1|CD28|DTX1|SOX13|PPP2R1A|ETS1|PRKCA|APBB1IP|RDX|LIMS2|SMAD3|EMP2|SPOCK2|APOA1|ELANE|LIMCH1|NEDD9|LAMA2|MDGA1|ITGAV|NPY2R|BMP2|DOCK1|CDK6|EPHA2|GATA3|ERBB3|TNFSF13B|NFKBID|PYCARD|LRFN3|RAC2|PRNP|HSPD1|POSTN|ZMIZ1|PIK3R1|PDPN|F11R|SMAD7|BCL2|PPP3CA|TACSTD2|FAM107A|ERBB2|PLXNA1|CAMSAP3|RIN2|NDFIP1|DDR1|ITGA2|FYN|ITGA6|COR…	112	1.13188e-10
wound healing (GO:0042060)	biological_process	P1	EPHB2|GNG2|RHOC|IRF2|GSN|HSPB1|TRPC3|ACTB|TSKU|C1GALT1C1|COL1A1|MYL12A|AJUBA|TLN1|ARRB2|GATA6|YAP1|PLSCR1|ETS1|PRKCA|COL3A1|SMAD3|DOCK1|PRKAR2B|GATA3|ERBB3|ANO6|TNFRSF12A|GP1BA|COL5A1|ARHGAP24|APOE|POSTN|GNA14|ZFPM2|PIK3R1|PDPN|NOTCH2|F11R|PPP3CA|ERBB2|PROCR|DDR1|ITGA2|FYN|VAV2|VEGFA|CD9|FERMT1|VCL|DCBLD2|PRDX2|GAS6|AXL|CADM4|PPIA|TGFBR2|PDGFA|F2R|DSP|NFE2L2|ANXA6|CXCR4|PROS1|FGF10|SPARC|GATA4|MY…	84	7.09863e-09
protein localization to membrane (GO:0072657)	biological_process	P1	CDH1|BMF|EPHB2|CNPY4|RPS4Y1|UBL4A|RPS3A|GSN|RPL39|FRMPD1|RPS3|ACTB|ATP1B1|YWHAB|YWHAH|RPL29|RPS16|REEP2|RPL35|RDX|DAB2|EMP2|RPS28|RPS13|RPL12|RPS4X|RPL18A|RPLP2|NLGN2|RPL36|EPHA2|RPS5|GLRB|RPL8|RPL11|ARHGEF16|RPL10A|PRNP|APOE|NHLRC1|PIK3R1|F11R|BCL2|ERBB2|TSPAN5|RPL6|GPC1|RPS14|FYN|CDK5|ADORA1|RPS24|RPS15|RHOG|MMP14|RAB15|PALM|RPL23|GAS6|ZDHHC15|RPL34|RPL28|RPL27A|ITGA3|NACAD|FLOT2|MIEF2|APPL1|AR…	99	7.11001e-09
response to growth factor (GO:0070848)	biological_process	P1	NDN|SEMA6A|HTRA3|WFIKKN2|ZFHX3|AMHR2|FGFBP3|CCBE1|PMEPA1|DLL1|ROBO1|HSPB1|BMPR2|NIBAN2|CD63|TWIST1|COL1A1|FAT4|IL12B|AMH|DSTYK|MXRA5|ARRB2|ANXA3|GATA6|ZYX|HNRNPA1|SMAD5|ZFP36L2|COL3A1|RDX|DAB2|CHST11|SMAD3|PCSK6|ZFP36L1|TWF2|TDGF1|BMP2|ITGB5|USP9Y|EPHA2|GATA3|ANOS1|ADAMTS7|RPL8|ERBB4|BMPR1A|DAND5|POSTN|ZMIZ1|NOTCH2|F11R|SMAD7|CPNE3|ERBB2|CITED1|BCL9L|GPC1|CRIM1|GIPC1|FYN|FLT3|VEGFA|FERMT1|NREP|CO…	105	1.51421e-08
cellular response to growth factor stimulus (GO:0071363)	biological_process	P1	NDN|SEMA6A|HTRA3|WFIKKN2|AMHR2|FGFBP3|CCBE1|PMEPA1|DLL1|ROBO1|HSPB1|BMPR2|NIBAN2|CD63|TWIST1|COL1A1|FAT4|IL12B|AMH|DSTYK|ARRB2|GATA6|ZYX|HNRNPA1|SMAD5|ZFP36L2|COL3A1|RDX|DAB2|CHST11|SMAD3|PCSK6|ZFP36L1|TWF2|TDGF1|BMP2|ITGB5|USP9Y|GATA3|ANOS1|ADAMTS7|RPL8|ERBB4|BMPR1A|DAND5|POSTN|ZMIZ1|NOTCH2|F11R|SMAD7|CPNE3|ERBB2|CITED1|BCL9L|GPC1|CRIM1|GIPC1|FYN|FLT3|VEGFA|FERMT1|NREP|COL4A2|PRKD1|SOX9|MEF2C|EE…	100	6.34821e-08
renal system development (GO:0072001)	biological_process	P1	WNT6|SOX4|WWTR1|TCF21|COL4A1|DLL1|GLI2|NFIA|FAT4|PYGO2|YAP1|SMAD5|SMAD3|ARID5B|KIRREL3|SERPINF1|WT1|BMP2|ITGA8|LGR4|GATA3|MTSS1|ENPEP|NOTCH2|SMAD7|BCL2|TACSTD2|CITED1|PLCE1|VEGFA|ID3|SOX9|MEF2C|NID1|HES1|IL6R|PDGFA|EPHA7|AMER1|ITGA3|SOX11|FGF10|LAMB2|NKX3-1|ASS1|JAG1|SMAD6|BAX|IQGAP1|CTNNB1|EXT1	51	1.20764e-06
regulation of body fluid levels (GO:0050878)	biological_process	P1	EPHB2|GNG2|IRF2|HSPB1|TRPC3|ACTB|C1GALT1C1|COL1A1|MYL12A|TLN1|ARRB2|LSR|GATA6|PLSCR1|PRKCA|COL3A1|EMP2|NPR1|DOCK1|AQP3|PRKAR2B|GATA3|ANO6|GP1BA|ERBB4|NCOR2|APOE|EDNRB|GNA14|ZFPM2|PIK3R1|PDPN|F11R|PROCR|DDR1|ITGA2|FYN|ADORA1|ADCY6|HSD11B2|VAV2|CORO2B|CEL|VEGFA|CD9|VCL|PRDX2|GAS6|AXL|PPIA|APRT|PDGFA|F2R|NFE2L2|AQP4|PROS1|FGF10|UPRT|OXTR|GATA4|MYH9|SYK|HEG1|HPS6|COL1A2|PAM|P2RX7|ST3GAL4|TLR4|CLDN1|P…	74	1.53393e-06
muscle structure development (GO:0061061)	biological_process	P1	FLNB|WFIKKN2|RGS4|ZFHX3|TCF21|DLL1|FZD2|NIBAN2|SEMA4C|TWIST1|MAML1|MYL6|LGALS1|ARRB2|SIK1|GATA6|ALPK3|SMAD3|ARID5B|LAMA2|ZFP36L1|TCF23|WT1|BMP2|TNNI3|CNTFR|SPEG|MSC|PDLIM3|ERBB3|BMPR1A|MRAS|EPAS1|EDNRB|OLFM2|ZFPM2|SMAD7|BCL2|PPP3CA|SGCE|SMARCD3|BCL9L|GPC1|OBSL1|TANC1|CDK5|PLD3|CHRNB1|VEGFA|CD9|SVIL|ID3|SOX9|MEF2C|TAFAZZIN|MMP14|ATF3|SYPL2|HES1|TBX2|PTGFRN|DSP|SOX11|JAM2|FGF10|FHOD3|HEY2|FLOT2|ASS…	85	1.60646e-06
actin filament-based process (GO:0030029)	biological_process	P1	FLNB|ZBED3|KCNJ5|RGS4|RHOC|GSN|FAT1|PLEK2|ABRACL|INSRR|NUAK2|ACTB|KCNQ1|TPM4|MYL6|TLN1|PFN1|ZYX|RDX|LIMA1|CSF1R|SMAD3|FRMD3|EMP2|APOA1|LIMCH1|NEDD9|AMOTL2|HIP1|TWF2|FAM171A1|SH3KBP1|TNNI3|ITGB5|OPHN1|CDC42EP4|PDLIM3|DPYSL3|PYCARD|MTSS1|ANTXR1|RAC2|PLA2G1B|MRAS|ARHGEF10L|PIK3R1|PDPN|NOTCH2|F11R|BCL2|ANG|MARCKSL1|TACSTD2|FAM107A|CGNL1|OBSL1|PLEKHH2|RAPGEF3|CDK5|PDE4D|ADORA1|CORO2B|FSCN1|NRK|SVIL|RH…	104	1.80802e-06
urogenital system development (GO:0001655)	biological_process	P1	EPHB2|WNT6|SOX4|WWTR1|TCF21|COL4A1|DLL1|GLI2|NFIA|FAT4|PYGO2|AMH|YAP1|SMAD5|SMAD3|ARID5B|KIRREL3|SERPINF1|WT1|BMP2|ITGA8|LGR4|GATA3|MTSS1|ENPEP|NOTCH2|SMAD7|BCL2|TACSTD2|CITED1|PLCE1|VEGFA|ID3|SOX9|MEF2C|NID1|HES1|IL6R|PDGFA|EPHA7|AMER1|ITGA3|SOX11|FGF10|LAMB2|NKX3-1|ASS1|EPHB3|JAG1|SMAD6|BAX|IQGAP1|CTNNB1|EXT1	54	2.39559e-06
kidney development (GO:0001822)	biological_process	P1	WNT6|SOX4|WWTR1|TCF21|DLL1|GLI2|FAT4|PYGO2|YAP1|SMAD5|SMAD3|ARID5B|KIRREL3|SERPINF1|WT1|BMP2|ITGA8|LGR4|GATA3|MTSS1|ENPEP|NOTCH2|SMAD7|BCL2|TACSTD2|CITED1|PLCE1|VEGFA|ID3|SOX9|MEF2C|NID1|HES1|IL6R|PDGFA|EPHA7|AMER1|ITGA3|SOX11|FGF10|LAMB2|NKX3-1|ASS1|JAG1|SMAD6|BAX|IQGAP1|CTNNB1|EXT1	49	2.99407e-06
cell-matrix adhesion (GO:0007160)	biological_process	P1	TNN|CD63|AJUBA|BCAM|ZYX|COL3A1|SMAD3|EMP2|LIMCH1|ITGAV|ITGB5|ITGA8|CDK6|ADAMTS9|POSTN|PIK3R1|BCL2|FAM107A|SGCE|CAMSAP3|RIN2|DDR1|ITGA2|CDK5|CORO2B|VEGFA|FERMT1|VCL|MMP14|PLEKHA2|NID1|ITGA3|SLK|EMILIN1|S100A10|JAG1|DAG1|CASK|NID2|LRP1|IQGAP1|RAC1	42	7.16689e-06
regulation of cell morphogenesis (GO:0022604)	biological_process	P1	RHOC|MOV10|MSN|FGR|RDX|CSF1R|LIMS2|APOA1|NEDD9|NTNG1|FAM171A1|SH3KBP1|DOCK1|CDC42EP4|SYT1|RAC2|POSTN|RASAL1|PDPN|F11R|TACSTD2|PLXNA1|BCL9L|OBSL1|FYN|VEGFA|ZMYM3|RHOG|PALM|NTNG2|SYT2|CAMK2B|PTPRD|CPNE5|CXCR4|ALDOA|SPARC|MYH9|RHOBTB3|ACTN4|S100A10|DAG1|FMNL2|PREX1|LIMD1|RHOBTB2|S100A13|PLXNC1|RAC1|FMNL3	50	1.61376e-05
developmental cell growth (GO:0048588)	biological_process	P1	NDN|SEMA6A|RGS4|DPYSL2|TNN|BMPR2|SEMA4C|DCLK1|SEMA6B|NRCAM|TWF2|SYT1|LLPH|APOE|POSTN|RASAL1|SMAD7|PLXNA1|DDR1|CDK5|VEGFA|VCL|SOX9|SYT2|MAG|TGFBR2|EPHA7|CPNE5|CXCR4|FLRT1|PRMT2|LAMB2|SEMA7A|GATA4|CXCL12|OLFM1|SEMA4B|LRP1|IQGAP1|CTNNB1	40	1.79395e-05
gliogenesis (GO:0042063)	biological_process	P1	NDN|SOX4|GSN|DLL1|PTPRZ1|DTX1|SOX13|CSF1R|PHGDH|LAMA2|BMP2|CDK6|ERBB3|C1QA|PRPF19|ZMIZ1|MED12|GPR157|ERBB2|MYRF|BACE2|GPC1|CDK5|SOX10|LDLR|CD9|GRN|SOX9|MMP14|HES1|MAG|SYNE2|CXCR4|SOX11|FGF10|LAMB2|NFIB|DAG1|NCMAP|GSTP1|LRP1|ADGRG1|TLR4|VIM|SPINT1	45	0.000101805
supramolecular fiber organization (GO:0097435)	biological_process	P1	ZBED3|RGS4|RHOC|GSN|COL5A2|FAT1|RPS3|COL1A1|TPM4|COLGALT1|PFN1|ZYX|COL3A1|RDX|LIMA1|SERPINH1|SMAD3|EMP2|PLOD3|APOA1|LIMCH1|NEDD9|HIP1|TWF2|FAM171A1|SH3KBP1|ITGB5|CDC42EP4|APC2|DPYSL3|PYCARD|NCKAP5|STMN3|RAC2|COL5A1|PLA2G1B|APOE|ARHGEF10L|LOXL2|PIK3R1|F11R|BCL2|ANG|NAV3|MARCKSL1|TACSTD2|FAM107A|CGNL1|NEFH|CAMSAP3|OBSL1|MID1IP1|PLEKHH2|RAPGEF3|LDLR|CORO2B|FSCN1|SVIL|RHOG|PDXP|LOXL4|SNCA|DSP|ALDOA|S…	89	0.000110545
ossification (GO:0001503)	biological_process	P1	CCR1|WWTR1|MMP2|TNN|COL5A2|BMPR2|GLI2|FGR|TWIST1|COL1A1|FAT4|TPM4|ACHE|YAP1|SMAD5|LRP5|FZD1|SMAD3|BMP2|CDK6|LGR4|EPHA2|ANO6|BMPR1A|DHRS3|SMAD7|BCL2|CITED1|SMOC1|CRIM1|RPS15|ID3|PRKD1|SOX9|MEF2C|VCAN|MMP14|IL6R|ANKH|SOX11|DDR2|CHSY1|TUFT1|SPARC|SEMA7A|LTBP3|JAG1|STC1|IFITM1|IGF2|SMAD6|COL1A2|P2RX7|LIMD1|CDH11|ISG15|EXT1	57	0.000113283
actin cytoskeleton organization (GO:0030036)	biological_process	P1	FLNB|ZBED3|RGS4|RHOC|GSN|FAT1|PLEK2|INSRR|NUAK2|ACTB|TPM4|TLN1|PFN1|ZYX|RDX|LIMA1|CSF1R|SMAD3|FRMD3|EMP2|APOA1|LIMCH1|NEDD9|AMOTL2|HIP1|TWF2|FAM171A1|SH3KBP1|ITGB5|OPHN1|CDC42EP4|PDLIM3|DPYSL3|PYCARD|MTSS1|ANTXR1|RAC2|PLA2G1B|MRAS|ARHGEF10L|PIK3R1|NOTCH2|F11R|BCL2|ANG|MARCKSL1|TACSTD2|FAM107A|CGNL1|OBSL1|PLEKHH2|RAPGEF3|CDK5|CORO2B|FSCN1|NRK|SVIL|RHOG|PDXP|PDGFA|RTKN|ALDOA|ABLIM2|FGF10|FHOD3|SYDE…	86	0.000209685
organic cyclic compound catabolic process (GO:1901361)	biological_process	P1	LSM7|H1-0|RPS4Y1|RPS3A|MOV10|CYP2A6|RPL39|ZC3HAV1|HSPB1|RPS3|TET1|YWHAB|YWHAH|RPL29|CSDC2|RPS16|ANP32A|PPP2R1A|RNASEL|PRKCA|ZFP36L2|RPL35|RPS28|RPS13|RPL12|RPS4X|ZFP36L1|HSD17B11|RPL18A|NBDY|RPLP2|RPL36|DPYD|RPS5|RPL8|RPL11|RPL10A|DCTPP1|DNASE2|APOE|HELZ2|FTO|CTIF|RPL6|HNMT|AMPD3|RPS14|DFFA|PDE4D|ZHX2|CEL|RPS24|RPS15|APEX1|PDXP|RPL23|CYP27A1|QDPR|RPL34|RPL28|NFE2L2|RPL27A|COMT|APOBEC3F|RPL5|RPL9|…	79	0.000479478
gland development (GO:0048732)	biological_process	P1	CAPN1|CDH1|TCF21|MSN|ROBO1|GLI2|PYGO2|LSR|GATA6|ETS1|LRP5|DEAF1|CSF1R|LIMS2|SMAD3|ARID5B|APOA1|TDGF1|SERPINF1|WT1|BMP2|EPHA2|GATA3|ERBB4|BMPR1A|NCOR2|NOTCH2|BCL2|PLXNA1|DDR1|ITGA2|IGSF3|SOX10|VEGFA|SOX9|ALDH1A3|PRDX2|HES1|NR5A1|TBX2|APRT|TGFBR2|PDGFA|QDPR|FGF10|NKX3-1|NTN4|UPRT|ASS1|OXTR|EPHB3|DAG1|IGF2|PAM|CPT1A|BAX|CLDN1	57	0.000490091
negative regulation of locomotion (GO:0040013)	biological_process	P1	SEMA6A|CDH1|PATZ1|KLRK1|TNN|CD200|ROBO1|ABHD6|SEMA4C|COL3A1|SEMA6B|ELANE|LIMCH1|SERPINF1|GATA3|STK24|ADAMTS9|DPYSL3|ERBB4|BMPR1A|APOE|SMAD7|BCL2|NAV3|TACSTD2|ADORA1|VCL|MEF2C|APEX1|NFE2L2|MCC|SEMA7A|MIR503|EMILIN1|JAG1|CTNNA1|FOXO3|DAG1|TCAF1|STC1|CXCL12|RIN3|IFITM1|GSTP1|SEMA4B|LRP1|ADGRG1|ATP2B4|RAC1|ZMYND8	50	0.000667605
glycoprotein biosynthetic process (GO:0009101)	biological_process	P1	ST6GALNAC1|B4GAT1|CHPF|EXTL2|GALNT18|GALNT16|BMPR2|TET1|C1GALT1C1|NDST4|CHST14|ST8SIA5|ST3GAL2|CHST11|ST6GALNAC4|PLOD3|POGLUT3|B3GALT6|CHST3|GALNT1|HS2ST1|BCL2|B3GNT3|BACE2|MGAT5|HS6ST1|GAL3ST4|VCAN|GALNT17|FUT9|TNIP1|GLCE|UGDH|ST3GAL6|CHSY1|GBGT1|POGLUT2|B3GNT7|ITM2C|CHST9|B3GNT2|XXYLT1|JAK3|ST3GAL4|ITM2B|DPY19L4|CTNNB1|TRAK1|EXT1	49	0.000729179
visual system development (GO:0150063)	biological_process	P1	EPHB2|WNT6|NAGLU|COL5A2|COL4A1|DLL1|BMPR2|TWIST1|BCAR3|TSKU|PYGO2|ACHE|LRP5|SMAD3|SERPINF1|WT1|EPHA2|GATA3|NDP|C1QA|COL5A1|NOTCH2|BCL2|SLITRK6|SMOC1|SMARCD3|NES|PBX3|OBSL1|ZHX2|VEGFA|SOX9|ALDH1A3|CDK4|GDF3|TBX2|TGFBR2|PPP1R13L|SIX5|SOX11|FGF10|LAMB2|TENM3|JAG1|BAX|LPCAT1|VIM|HIPK2|CDON|SALL2|ATP2B4	51	0.00084104
eye development (GO:0001654)	biological_process	P1	EPHB2|WNT6|NAGLU|COL5A2|COL4A1|DLL1|BMPR2|TWIST1|BCAR3|TSKU|PYGO2|ACHE|LRP5|SMAD3|SERPINF1|WT1|EPHA2|GATA3|NDP|COL5A1|NOTCH2|BCL2|SLITRK6|SMOC1|SMARCD3|NES|PBX3|OBSL1|ZHX2|VEGFA|SOX9|ALDH1A3|CDK4|GDF3|TBX2|TGFBR2|PPP1R13L|SIX5|SOX11|FGF10|LAMB2|TENM3|JAG1|BAX|LPCAT1|VIM|HIPK2|CDON|SALL2|ATP2B4	50	0.00121233
sensory system development (GO:0048880)	biological_process	P1	EPHB2|WNT6|NAGLU|COL5A2|COL4A1|DLL1|BMPR2|TWIST1|BCAR3|TSKU|PYGO2|ACHE|LRP5|SMAD3|SERPINF1|WT1|EPHA2|GATA3|NDP|C1QA|COL5A1|NOTCH2|BCL2|SLITRK6|SMOC1|SMARCD3|NES|PBX3|OBSL1|ZHX2|VEGFA|SOX9|ALDH1A3|CDK4|GDF3|TBX2|TGFBR2|PPP1R13L|SIX5|SOX11|FGF10|LAMB2|TENM3|JAG1|BAX|LPCAT1|VIM|HIPK2|CDON|SALL2|ATP2B4	51	0.00124946
peptide metabolic process (GO:0006518)	biological_process	P1	EEF1A1P5|GGT1|SOX4|RPS4Y1|RPS3A|MOV10|RPL39|PPP1CA|HSPB1|RPS3|RPL29|RPS16|CD28|PDF|ZFP36L2|RPL35|CNDP2|ELANE|RPS28|PCSK6|RPS13|GSTA1|LARP6|RPL12|RPS4X|ZFP36L1|GRB7|RPL18A|RPLP2|RPL36|RPS5|RPL8|RPL11|RPL10A|PRNP|ENPEP|APOE|GADD45GIP1|ABCG1|ANG|ERBB2|EIF2AK2|COA3|CPXM1|SHMT2|FTO|BACE2|CTIF|RPL6|MRPL16|RPS14|ITGA2|MRPL15|GGT6|RPS24|RPS15|EEF1A1|MRPS26|CPQ|CDK4|GGT7|GSTO1|RPL23|TNIP1|RPL34|RPL28|NFE2…	100	0.00129753
heterocycle catabolic process (GO:0046700)	biological_process	P1	LSM7|H1-0|RPS4Y1|RPS3A|MOV10|CYP2A6|RPL39|ZC3HAV1|HSPB1|RPS3|TET1|YWHAB|RPL29|CSDC2|RPS16|ANP32A|PPP2R1A|RNASEL|PRKCA|ZFP36L2|RPL35|RPS28|RPS13|RPL12|RPS4X|ZFP36L1|RPL18A|NBDY|RPLP2|RPL36|DPYD|RPS5|RPL8|RPL11|RPL10A|DCTPP1|DNASE2|HELZ2|FTO|CTIF|RPL6|HNMT|AMPD3|RPS14|DFFA|PDE4D|ZHX2|RPS24|RPS15|APEX1|PDXP|RPL23|RPL34|RPL28|NFE2L2|RPL27A|APOBEC3F|RPL5|RPL9|PSME1|RPS8|RPL14|RPL18|RPL41|RPLP1|RPS2|RP…	72	0.00142
aromatic compound catabolic process (GO:0019439)	biological_process	P1	LSM7|H1-0|RPS4Y1|RPS3A|MOV10|CYP2A6|RPL39|ZC3HAV1|HSPB1|RPS3|TET1|YWHAB|RPL29|CSDC2|RPS16|ANP32A|PPP2R1A|RNASEL|PRKCA|ZFP36L2|RPL35|RPS28|RPS13|RPL12|RPS4X|ZFP36L1|RPL18A|NBDY|RPLP2|RPL36|DPYD|RPS5|RPL8|RPL11|RPL10A|DCTPP1|DNASE2|HELZ2|FTO|CTIF|RPL6|HNMT|AMPD3|RPS14|DFFA|PDE4D|ZHX2|RPS24|RPS15|APEX1|PDXP|RPL23|EPHX1|QDPR|RPL34|RPL28|RPL27A|COMT|APOBEC3F|RPL5|RPL9|PSME1|RPS8|RPL14|RPL18|RPL41|RPLP…	74	0.00145118
Mullerian duct regression (GO:0001880)	biological_process	P1	AMHR2|AMH|SMAD5|BMPR1A	4	0.00149474
sulfur compound metabolic process (GO:0006790)	biological_process	P1	GGT1|B4GAT1|SULT1C4|PAPSS1|CHPF|SCD|ACSM3|NDST4|CHST14|ACSL4|ST3GAL2|CNDP2|CHST11|PHGDH|SPOCK2|SULT1A2|GSTA1|B3GALT6|MTHFD1|CHST3|SLC35B2|B3GNT3|TPST2|GGT6|PDHA1|GAL3ST4|VCAN|MGST3|GGT7|GSTO1|GLCE|SMS|UGDH|NFE2L2|ST3GAL6|CHSY1|GLO1|ARL6IP5|B3GNT7|GSTM4|PDZD11|GSTP1|CHST9|ACOT9|B3GNT2|GSTA4|GSTT2|ST3GAL4|HPGDS|PDK3|EXT1	51	0.00154578
muscle contraction (GO:0006936)	biological_process	P1	KCNJ5|GSN|ATP1B1|MYL12A|KCNQ1|TPM4|MYL6|TLN1|SMAD5|NPY2R|SNTB1|TNNI3|ITGB5|CD38|EDNRB|MYL7|SMAD7|TMEM38A|ITGA2|CHRNB1|PDE4D|PLCE1|DTNA|ADORA1|VCL|MYOM3|TAFAZZIN|ENO1|GSTO1|TBX2|PPP1R13L|SCN7A|F2R|DSP|ANXA6|CXCR4|ALDOA|OXTR|GATA4|DMD|ARHGAP42|STC1|HRC|CALCRL|MYLK2|SNTA1|VIM|ATP2B4	48	0.00183578
Ras protein signal transduction (GO:0007265)	biological_process	P1	EPHB2|ROBO1|ARHGEF3|FBP1|ABCA1|COL3A1|RDX|RAB33B|APOA1|OPHN1|CDC42EP4|ARHGAP1|RALGDS|STMN3|RAC2|MAPRE2|ARHGAP24|MRAS|APOE|RASAL1|PDPN|NOTCH2|F11R|CTNNAL1|RFXANK|RAPGEF3|PLCE1|RALB|PRKD1|RHOG|RAB15|CADM4|RTKN|F2R|ITGA3|PSD4|FGF10|TP53|ARHGAP42|HEG1|COL1A2|JUN|RAB35|RAB30|LPAR4|ADGRG1|RAC1	47	0.00201095
epithelial cell proliferation (GO:0050673)	biological_process	P1	ROBO1|IGFBP4|BMPR2|TWIST1|PYGO2|IL12B|YAP1|DEAF1|PRKCA|LIMS2|SMAD3|APOA1|ZFP36L1|SERPINF1|BMP2|CDK6|LGR4|EPHA2|GATA3|MTSS1|BMPR1A|APOE|EDNRB|LOXL2|NOTCH2|ANG|SERPINB1|ERBB2|VEGFA|GRN|FERMT1|PRKD1|SOX9|MEF2C|MMP14|HES1|SOX11|MCC|B2M|FGF10|NKX3-1|SPARC|NFIB|MIR503|CXCL12|WFDC1|IGF2|CASK|PEX2|CDH3|BAX|TLR4|CLDN1|JCAD	54	0.00266151
negative regulation of cellular component movement (GO:0051271)	biological_process	P1	CDH1|PATZ1|KLRK1|TNN|CD200|ROBO1|ABHD6|COL3A1|LIMCH1|SERPINF1|GATA3|STK24|ADAMTS9|DPYSL3|ERBB4|BMPR1A|APOE|SMAD7|BCL2|NAV3|TACSTD2|ADORA1|CD9|VCL|MEF2C|APEX1|NFE2L2|MCC|MIR503|EMILIN1|JAG1|CTNNA1|FOXO3|DAG1|TCAF1|STC1|CXCL12|RIN3|IFITM1|GSTP1|LRP1|ADGRG1|ATP2B4|RAC1|ZMYND8	45	0.00274094
response to oxygen levels (GO:0070482)	biological_process	P1	DDAH1|MMP2|TWIST1|ATP1B1|COL1A1|AJUBA|GATA6|ETS1|SMAD3|ZFP36L1|BMP2|AQP3|MGARP|CD38|KCNK3|POSTN|EPAS1|LOXL2|PDPN|NOS2|BCL2|ANG|EGLN1|ITGA2|ADORA1|HSD11B2|VEGFA|MMP14|ENO1|CDK4|TGFBR2|NFE2L2|EGLN3|CXCR4|SCAP|NKX3-1|OXTR|CASP1|ACTN4|PLOD1|DNMT3A|PSME1|TP53|STC1|CXCL12|PAM|LIMD1|CYBB|PDK3|HIPK2	50	0.00305773
negative regulation of cell motility (GO:2000146)	biological_process	P1	CDH1|PATZ1|KLRK1|TNN|CD200|ROBO1|ABHD6|COL3A1|LIMCH1|SERPINF1|GATA3|STK24|ADAMTS9|DPYSL3|ERBB4|BMPR1A|APOE|SMAD7|BCL2|NAV3|TACSTD2|ADORA1|VCL|MEF2C|APEX1|NFE2L2|MCC|MIR503|EMILIN1|JAG1|CTNNA1|FOXO3|DAG1|TCAF1|STC1|CXCL12|RIN3|IFITM1|GSTP1|LRP1|ADGRG1|ATP2B4|RAC1|ZMYND8	44	0.00322771
peptidyl-tyrosine modification (GO:0018212)	biological_process	P1	EPHB2|MVP|INSRR|IGF1R|FGR|IL12B|INSR|DSTYK|ARRB2|PPP2R1A|CAMKK2|CSF1R|NEDD9|TDGF1|PARP14|EPHA2|ERBB3|ERBB4|PRNP|ERBB2|EIF2AK2|SOCS3|TPST2|DDR1|FYN|FLT3|ADORA1|VEGFA|GAS6|HES1|AXL|CADM4|IL6R|PDGFA|EPHA7|DDR2|AFAP1L2|FGF10|EPHB3|CTF1|SYK|TP53|NCK2|GPRC5B|IGF2|JAK3|IQGAP1|HIPK2|TYK2	49	0.00337323
response to hypoxia (GO:0001666)	biological_process	P1	DDAH1|MMP2|TWIST1|ATP1B1|AJUBA|GATA6|ETS1|SMAD3|ZFP36L1|BMP2|AQP3|MGARP|CD38|KCNK3|POSTN|EPAS1|LOXL2|NOS2|BCL2|ANG|EGLN1|ITGA2|ADORA1|HSD11B2|VEGFA|MMP14|ENO1|TGFBR2|NFE2L2|EGLN3|CXCR4|SCAP|NKX3-1|CASP1|ACTN4|PLOD1|DNMT3A|PSME1|TP53|STC1|CXCL12|PAM|LIMD1|CYBB|PDK3|HIPK2	46	0.00360662
response to virus (GO:0009615)	biological_process	P1	IFITM2|IRF2|IFI6|MOV10|GSDME|IFI44|ZC3HAV1|HSPB1|FGR|DCLK1|IL12B|TRIM56|RNASEL|PLSCR1|IL10RB|NLRC5|OAS1|TICAM1|IFNE|SERINC5|POLR3K|CDK6|GATA3|IFIT3|PYCARD|H19|IFI16|BCL2|EIF2AK2|IFNAR1|IFITM3|OAS3|ENO1|CXCR4|DDX60|APOB|DTX3L|IFIT2|APOBEC3F|BCL3|IFNAR2|CXCL12|SHFL|IFITM1|BAX|ISG15|EXT1	47	0.00367008
camera-type eye development (GO:0043010)	biological_process	P1	EPHB2|WNT6|NAGLU|COL4A1|DLL1|BMPR2|TWIST1|BCAR3|TSKU|PYGO2|ACHE|LRP5|SMAD3|SERPINF1|WT1|EPHA2|GATA3|NDP|NOTCH2|SLITRK6|SMARCD3|NES|OBSL1|ZHX2|VEGFA|SOX9|ALDH1A3|CDK4|TBX2|TGFBR2|PPP1R13L|SIX5|SOX11|FGF10|LAMB2|TENM3|JAG1|BAX|LPCAT1|VIM|HIPK2|CDON|ATP2B4	43	0.00379558
establishment of protein localization to organelle (GO:0072594)	biological_process	P1	CDH1|BMF|PKIA|RPS4Y1|RPS3A|RPL39|ECH1|RPS3|YWHAB|YWHAH|RPL29|RPS16|RPL35|TOMM40|SMAD3|RPS28|RPS13|TOMM40L|RPL12|RPS4X|OPHN1|RPL18A|RPLP2|RPL36|MGARP|RPS5|RPL8|RPL11|RPL10A|RAC2|HSPD1|PIK3R1|NOS2|BCL2|PPP3CA|RPL6|RPS14|SREBF2|FERMT1|RPS24|RPS15|RPL23|ZDHHC15|AIP|MBTPS1|RPL34|RPL28|RPL27A|HUWE1|MDFIC|APPL1|RPL5|RPL9|SYK|RPS8|TP53|RPL14|RPL18|CHMP4B|RPL41|RPLP1|MOAP1|PEX2|RPS2|RPL27|BAX|RPS27|NFKBIA…	69	0.0038292
actin filament organization (GO:0007015)	biological_process	P1	ZBED3|RGS4|RHOC|GSN|FAT1|TPM4|PFN1|ZYX|RDX|LIMA1|SMAD3|EMP2|APOA1|LIMCH1|NEDD9|HIP1|TWF2|FAM171A1|SH3KBP1|ITGB5|CDC42EP4|DPYSL3|PYCARD|RAC2|PLA2G1B|ARHGEF10L|PIK3R1|F11R|BCL2|ANG|MARCKSL1|TACSTD2|FAM107A|CGNL1|PLEKHH2|RAPGEF3|CORO2B|FSCN1|SVIL|RHOG|PDXP|ALDOA|FHOD3|CD47|RHOBTB3|S100A10|CTNNA1|NCK2|CXCL12|PREX1|AIF1L|RHOBTB2|GMFB|SYNPO|RAC1	55	0.00391485
response to decreased oxygen levels (GO:0036293)	biological_process	P1	DDAH1|MMP2|TWIST1|ATP1B1|AJUBA|GATA6|ETS1|SMAD3|ZFP36L1|BMP2|AQP3|MGARP|CD38|KCNK3|POSTN|EPAS1|LOXL2|NOS2|BCL2|ANG|EGLN1|ITGA2|ADORA1|HSD11B2|VEGFA|MMP14|ENO1|TGFBR2|NFE2L2|EGLN3|CXCR4|SCAP|NKX3-1|OXTR|CASP1|ACTN4|PLOD1|DNMT3A|PSME1|TP53|STC1|CXCL12|PAM|LIMD1|CYBB|PDK3|HIPK2	47	0.00408329
negative regulation of cell migration (GO:0030336)	biological_process	P1	CDH1|PATZ1|KLRK1|TNN|CD200|ROBO1|ABHD6|COL3A1|LIMCH1|SERPINF1|STK24|ADAMTS9|DPYSL3|ERBB4|BMPR1A|APOE|SMAD7|BCL2|NAV3|TACSTD2|ADORA1|VCL|MEF2C|APEX1|NFE2L2|MCC|MIR503|EMILIN1|JAG1|FOXO3|DAG1|TCAF1|STC1|CXCL12|RIN3|IFITM1|GSTP1|LRP1|ADGRG1|ATP2B4|RAC1|ZMYND8	42	0.00414578
glomerulus morphogenesis (GO:0072102)	biological_process	P1	TCF21|KIRREL3|MTSS1|NOTCH2|MEF2C	5	0.00422136
cellular nitrogen compound catabolic process (GO:0044270)	biological_process	P1	LSM7|H1-0|RPS4Y1|RPS3A|MOV10|RPL39|ZC3HAV1|HSPB1|RPS3|TET1|YWHAB|RPL29|CSDC2|RPS16|ANP32A|PPP2R1A|RNASEL|PRKCA|ZFP36L2|RPL35|RPS28|RPS13|RPL12|RPS4X|ZFP36L1|RPL18A|NBDY|RPLP2|RPL36|DPYD|RPS5|RPL8|RPL11|RPL10A|DCTPP1|DNASE2|HELZ2|FTO|CTIF|RPL6|HNMT|AMPD3|RPS14|DFFA|PDE4D|ZHX2|RPS24|RPS15|APEX1|PDXP|RPL23|RPL34|RPL28|RPL27A|APOBEC3F|RPL5|RPL9|PSME1|RPS8|RPL14|RPL18|RPL41|RPLP1|RPS2|RPL27|BAX|EXOSC6…	70	0.00443363
reproductive structure development (GO:0048608)	biological_process	P1	PATZ1|STOX2|AMHR2|TCF21|BMPR2|GLI2|AMH|TFEB|ARRB2|GATA6|PCYT1B|HSD17B3|ARID5B|ZFP36L1|TCF23|SERPINF1|WT1|LGR4|GATA3|NDP|INHA|SRY|EPAS1|ZFPM2|NOTCH2|BCL2|ANG|CITED1|SOCS3|VEGFA|LHX9|SOX9|MMP14|HES1|NR5A1|AXL|FGF10|HEY2|NKX3-1|GATA4|RHOBTB3|CTNNA1|STC1|KRT8|IGF2|NRIP1|MDFI|INHBB|BAX|ADGRG1|PLAC1|SPINT1	52	0.00448185
peptidyl-tyrosine phosphorylation (GO:0018108)	biological_process	P1	EPHB2|MVP|INSRR|IGF1R|FGR|IL12B|INSR|DSTYK|ARRB2|PPP2R1A|CAMKK2|CSF1R|NEDD9|TDGF1|PARP14|EPHA2|ERBB3|ERBB4|PRNP|ERBB2|EIF2AK2|SOCS3|DDR1|FYN|FLT3|ADORA1|VEGFA|GAS6|HES1|AXL|CADM4|IL6R|PDGFA|EPHA7|DDR2|AFAP1L2|FGF10|EPHB3|CTF1|SYK|TP53|NCK2|GPRC5B|IGF2|JAK3|IQGAP1|HIPK2|TYK2	48	0.00487204
reproductive system development (GO:0061458)	biological_process	P1	PATZ1|STOX2|AMHR2|TCF21|BMPR2|GLI2|AMH|TFEB|ARRB2|GATA6|PCYT1B|HSD17B3|ARID5B|ZFP36L1|TCF23|SERPINF1|WT1|LGR4|GATA3|NDP|INHA|SRY|EPAS1|ZFPM2|NOTCH2|BCL2|ANG|CITED1|SOCS3|VEGFA|LHX9|SOX9|MMP14|HES1|NR5A1|AXL|FGF10|HEY2|NKX3-1|GATA4|RHOBTB3|CTNNA1|STC1|KRT8|IGF2|NRIP1|MDFI|INHBB|BAX|ADGRG1|PLAC1|SPINT1	52	0.00525155
growth plate cartilage chondrocyte development (GO:0003431)	biological_process	P1	COL27A1|TSKU|SOX9|TGFBR2	4	0.00530233
regulation of cell activation (GO:0050865)	biological_process	P1	SIRPA|KLRK1|SOX4|CD200|VSIG4|GLI2|FGR|RPS3|IL12B|LGALS1|CD28|DTX1|SOX13|PLSCR1|PRKCA|ZFP36L2|TICAM1|ZFP36L1|SH3KBP1|GATA3|CD38|TNFSF13B|NFKBID|PYCARD|RAC2|INHA|PRNP|HSPD1|APOE|ZMIZ1|PIK3R1|PDPN|LRFN5|F11R|SHPK|SMAD7|BCL2|ERBB2|NDFIP1|PKN1|FYN|LDLR|CD9|GRN|MEF2C|MMP14|PRDX2|GAS6|HES1|AXL|TGFBR2|PDGFA|SH3RF1|SOX11|EFNB1|FGF10|FLOT2|CD47|EMILIN1|SHLD1|GAB2|SYK|NCK2|CD22|IGF2|JAK3|CR1|EXOSC6|SYT11|TL…	72	0.00546994
epithelial cell migration (GO:0010631)	biological_process	P1	PATZ1|CCBE1|ROBO1|HSPB1|BMPR2|PFN1|ANXA3|ETS1|PRKCA|EMP2|APOA1|ZEB2|TDGF1|GLIPR2|SERPINF1|DOCK1|EPHA2|GATA3|ADAMTS9|MAPRE2|APOE|LOXL2|TACSTD2|RIN2|GIPC1|PKN1|ITGA2|VEGFA|GRN|FERMT1|PRKD1|SOX9|MEF2C|TGFBR2|NFE2L2|ITGA3|MCC|FGF10|SPARC|MYH9|MIR503|STC1|ATP2B4|RAC1|JCAD	45	0.00586514
cellular amide metabolic process (GO:0043603)	biological_process	P1	EEF1A1P5|GGT1|SOX4|RPS4Y1|RPS3A|MOV10|RPL39|PGAM1|SCD|PPP1CA|HSPB1|RPS3|ACSM3|RPL29|RPS16|CD28|PPP2R1A|PDF|ACSL4|ST3GAL2|ZFP36L2|RPL35|CNDP2|ST6GALNAC4|ELANE|RPS28|PCSK6|RPS13|GSTA1|LARP6|RPL12|RPS4X|ZFP36L1|GRB7|RPL18A|MTHFD1|RPLP2|RPL36|RPS5|RPL8|RPL11|RPL10A|PRNP|ENPEP|APOE|ABCA8|GADD45GIP1|ABCG1|ANG|ERBB2|EIF2AK2|COA3|CERS4|CPXM1|SHMT2|FTO|BACE2|CTIF|RPL6|MRPL16|RPS14|ITGA2|MRPL15|GGT6|PDHA1|…	121	0.00618866
epithelium migration (GO:0090132)	biological_process	P1	PATZ1|CCBE1|ROBO1|HSPB1|BMPR2|PFN1|ANXA3|ETS1|PRKCA|EMP2|APOA1|ZEB2|TDGF1|GLIPR2|SERPINF1|DOCK1|EPHA2|GATA3|ADAMTS9|MAPRE2|APOE|LOXL2|TACSTD2|RIN2|GIPC1|PKN1|ITGA2|VEGFA|GRN|FERMT1|PRKD1|SOX9|MEF2C|TGFBR2|NFE2L2|ITGA3|MCC|FGF10|SPARC|MYH9|MIR503|STC1|ATP2B4|RAC1|JCAD	45	0.00687659
negative regulation of protein phosphorylation (GO:0001933)	biological_process	P1	EPHB2|PKIA|SIRPA|ZBED3|WWTR1|RGS4|PMEPA1|MVP|TFAP4|TRIB2|CDKN1B|HSPB1|IGF1R|TWIST1|YWHAB|TRIB3|ARRB2|PPP2R1A|LRP5|PARP14|PRKAR2B|CAMK2N1|PYCARD|PRNP|APOE|KLHL31|SMAD7|SOCS3|PKN1|PDE4D|TAOK3|CADM4|PPIA|SNCA|EMILIN1|DMD|NCK2|DUSP16|DBNDD1|SMAD6|HEG1|GSTP1|BAX|CTDSP2|GMFB|PRKAR1B	46	0.00732672
tissue migration (GO:0090130)	biological_process	P1	PATZ1|CCBE1|ROBO1|HSPB1|BMPR2|PFN1|ANXA3|ETS1|PRKCA|EMP2|APOA1|ZEB2|TDGF1|GLIPR2|SERPINF1|DOCK1|EPHA2|GATA3|ADAMTS9|MAPRE2|APOE|LOXL2|TACSTD2|RIN2|GIPC1|PKN1|ITGA2|VEGFA|GRN|FERMT1|PRKD1|SOX9|MEF2C|TGFBR2|NFE2L2|ITGA3|MCC|FGF10|SPARC|MYH9|MIR503|STC1|ATP2B4|RAC1|JCAD	45	0.0089419
negative regulation of phosphorylation (GO:0042326)	biological_process	P1	EPHB2|PKIA|SIRPA|ZBED3|WWTR1|RGS4|PMEPA1|MVP|TFAP4|TRIB2|CDKN1B|HSPB1|IGF1R|TWIST1|YWHAB|AJUBA|TRIB3|PPIF|ARRB2|PPP2R1A|FBP1|LRP5|PARP14|PRKAR2B|CAMK2N1|PYCARD|INHA|PRNP|APOE|KLHL31|SMAD7|SOCS3|PKN1|PDE4D|TAOK3|CADM4|PPIA|SNCA|EMILIN1|DMD|NCK2|DUSP16|DBNDD1|SMAD6|HEG1|GSTP1|BAX|CTDSP2|GMFB|PRKAR1B	50	0.00895203
viral life cycle (GO:0019058)	biological_process	P1	IFITM2|TRIM21|GSN|PPIB|ZC3HAV1|NFIA|LY6E|LGALS1|CD28|MVB12A|RNASEL|PLSCR1|NUCKS1|OAS1|ITGAV|ITGB5|FAM111A|EPHA2|CLEC4M|APOE|CHMP4C|IFI16|F11R|BCL2|EIF2AK2|ITGA2|IFITM3|LDLR|OAS3|GAS6|MID2|AXL|PPIA|TNIP1|ANPEP|CXCR4|APOBEC3F|DAG1|SHFL|IFITM1|CHMP4B|TRIM8|CR1|CLDN1|ISG15	45	0.00942321
regulation of DNA-binding transcription factor activity (GO:0051090)	biological_process	P1	NDN|CCDC22|TRIM21|CD200|FZD2|TWIST1|RPS3|AMH|ARRB2|SIK1|ANXA3|LRP5|NLRC5|FZD1|SMAD3|ARID5B|TICAM1|NDP|PYCARD|PRNP|PLA2G1B|SMAD7|PPP3CA|CRTC3|EGLN1|EIF2AK2|VEGFA|TCEAL7|ID3|PRKD1|MBTPS2|PRDX2|GAS6|HES1|MID2|PPIA|ESR2|PRMT2|DDR2|IRAK2|NKX3-1|FLOT2|COMMD6|SYK|JUN|MDFI|COMMD7|NFKB2|TRIM8|TLR4|HIPK2|CTNNB1|NFKBIA|BEX1	54	0.00960714
chondrocyte proliferation (GO:0035988)	biological_process	P1	BMPR2|SMAD7|SOX9|MMP14|DDR2|STC1|EXT1	7	0.00965519
regulation of epithelial cell proliferation (GO:0050678)	biological_process	P1	ROBO1|BMPR2|TWIST1|PYGO2|IL12B|YAP1|DEAF1|PRKCA|LIMS2|SMAD3|ZFP36L1|SERPINF1|BMP2|CDK6|GATA3|MTSS1|BMPR1A|APOE|EDNRB|NOTCH2|ANG|ERBB2|VEGFA|GRN|PRKD1|SOX9|MEF2C|HES1|SOX11|MCC|B2M|FGF10|NKX3-1|SPARC|NFIB|MIR503|CXCL12|WFDC1|IGF2|CASK|PEX2|CDH3|BAX|TLR4|CLDN1|JCAD	46	0.00984845
sensory organ development (GO:0007423)	biological_process	P1	EPHB2|WNT6|NAGLU|GSDME|COL5A2|COL4A1|DLL1|BMPR2|FZD2|GLI2|TWIST1|BCAR3|TSKU|FAT4|KCNQ1|LRP10|PYGO2|ACHE|LRP5|SMAD3|SERPINF1|WT1|BMP2|EPHA2|GATA3|NDP|COL5A1|KCNK3|NOTCH2|BCL2|SLITRK6|SMOC1|SMARCD3|NES|PBX3|OBSL1|TSHZ1|DDR1|ZHX2|VEGFA|SOX9|ALDH1A3|CDK4|GDF3|HES1|TBX2|TGFBR2|PPP1R13L|SIX5|SOX11|FGF10|LAMB2|HEY2|SPARC|TENM3|JAG1|BAX|LPCAT1|VIM|HIPK2|CDON|SALL2|ATP2B4	63	0.0103698
lymphocyte proliferation (GO:0046651)	biological_process	P1	PLCL2|MSN|VSIG4|RPS3|IL12B|CD28|TICAM1|IFNE|CD38|TNFSF13B|PYCARD|RAC2|PRNP|HSPD1|BCL2|ERBB2|NDFIP1|PKN1|FYN|FLT3|MEF2C|PRDX2|HES1|TGFBR2|SH3RF1|SOX11|EFNB1|FGF10|SYK|TP53|NCK2|CD22|IGF2|BAX|JAK3|CR1|TLR4|ELF4	38	0.0105921
response to peptide hormone (GO:0043434)	biological_process	P1	ZBED3|IRS1|GNRHR|INSRR|IGF1R|BCAR3|COL1A1|TRIB3|INSR|ENHO|LRP5|NUCKS1|STAT6|PTPRE|ZFP36L1|PRKAR2B|LPIN3|MGARP|PLA2G1B|EDNRB|PIK3R1|CITED1|SOCS3|FYN|ADCY6|HSD11B2|APEX1|RAB15|CDK4|NR5A1|CYP11A1|APRT|QDPR|NFE2L2|SCAP|SPARC|UPRT|ASS1|APPL1|OXTR|CRHBP|TRIM16|DAG1|CXCL12|IGF2|SLC39A14|GSTP1|INHBB|JAK3|IQGAP1|CYBB|PRKAR1B|SOGA1	53	0.0108972
cellular response to external stimulus (GO:0071496)	biological_process	P1	NUAK2|BMPR2|COL1A1|TFEB|SIK1|SLC38A2|HNRNPA1|AQP3|STK24|DCTPP1|FADS1|IFI16|POSTN|TMEM150C|F11R|BCL2|DAPL1|FAM107A|EIF2AK2|ITGA2|SREBF2|RALB|PRKD1|SOX9|SIPA1|ATF3|GAS6|AXL|MAG|NFE2L2|CASP1|TP53|FOXO3|DAG1|GSTP1|TLE5|JUN|INHBB|TLR4|RAC1	40	0.0116145
lacrimal gland development (GO:0032808)	biological_process	P1	IGSF3|SOX10|SOX9|FGF10	4	0.0118811
mononuclear cell proliferation (GO:0032943)	biological_process	P1	PLCL2|MSN|VSIG4|RPS3|IL12B|CD28|TICAM1|IFNE|CD38|TNFSF13B|PYCARD|RAC2|PRNP|HSPD1|BCL2|ERBB2|NDFIP1|PKN1|FYN|FLT3|MEF2C|PRDX2|HES1|TGFBR2|SH3RF1|SOX11|EFNB1|FGF10|SYK|TP53|NCK2|CD22|IGF2|BAX|JAK3|CR1|TLR4|ELF4	38	0.0126556
regulation of proteolysis (GO:0030162)	biological_process	P1	CCDC22|OSBPL7|WFIKKN2|TRIM21|IFI6|CCBE1|GSN|TFAP4|UBQLN2|TRIB2|ROBO1|RPS3|SERPINB8|TRIB3|ARRB2|DAB2|SERPINH1|MAGEF1|USP13|SMAD3|SPOCK2|RHBDF1|HIP1|SERPINF1|OPHN1|CAMK2N1|ARAF|ANOS1|RPL11|PYCARD|MTCH1|ANTXR1|PRNP|HSPD1|APOE|PEBP1|IFI16|SMAD7|DET1|SERPINB1|CRIM1|GIPC1|FYN|CDK5|VEGFA|GRN|A2ML1|MMP14|ENO1|RPL23|GAS6|TNIP1|SH3RF1|EPHA7|F2R|SNCA|NFE2L2|EGLN3|PROS1|CSNK1E|NKX3-1|PLGRKT|MYH9|CASP1|ARL6IP…	79	0.0147203
regulation of cellular catabolic process (GO:0031329)	biological_process	P1	CAPN1|BMF|CCDC22|VGLL4|OSBPL7|MTMR8|APOC1|TRIM21|MOV10|MSN|IRS1|UBQLN2|PGAM1|ZC3HAV1|TRIB2|PPP1CA|HSPB1|TWIST1|YWHAB|TRIB3|INSR|CSDC2|TFEB|KDM4A|ANP32A|CAMKK2|RNASEL|PRKCA|ZFP36L2|RDX|DAB2|MAGEF1|HSPB8|USP13|APOA1|TICAM1|VDAC1|RHBDF1|CTSA|ZFP36L1|OPHN1|SH3BP4|ARAF|RPL11|PYCARD|APOE|IFI16|TMEM150C|SMAD7|BCL2|DET1|DAPL1|FTO|GIPC1|DFFA|CDK5|SREBF2|LDLR|RALB|PRKD1|EEF1A1|APEX1|RPL23|MID2|SNCA|NFE2L2|…	90	0.0162449
regulation of catabolic process (GO:0009894)	biological_process	P1	CAPN1|CDH1|BMF|CCDC22|VGLL4|OSBPL7|MTMR8|APOC1|TRIM21|MOV10|MSN|IRS1|UBQLN2|PGAM1|ZC3HAV1|TRIB2|CDKN1B|PPP1CA|HSPB1|TWIST1|YWHAB|TRIB3|INSR|CSDC2|TFEB|KDM4A|ANP32A|CAMKK2|RNASEL|FBP1|PRKCA|ZFP36L2|RDX|DAB2|MAGEF1|HSPB8|USP13|SMAD3|APOA1|TICAM1|VDAC1|RHBDF1|CTSA|ZFP36L1|OPHN1|SH3BP4|ARAF|APC2|RPL11|PYCARD|APOE|IFI16|TMEM150C|SMAD7|NOS2|BCL2|CRTC3|DET1|DAPL1|FTO|GIPC1|NDFIP1|DFFA|FYN|CDK5|ADORA1|SR…	104	0.0165043
lymphocyte activation (GO:0046649)	biological_process	P1	PATZ1|SIRPA|PLCL2|KLRK1|SOX4|MSN|GSN|DLL1|MR1|VSIG4|GLI2|FGR|RPS3|IL12B|LGALS1|CD28|DTX1|SOX13|APBB1IP|ZFP36L2|RELB|SMAD3|TICAM1|IFNE|ZFP36L1|SH3KBP1|GATA3|CD38|TNFSF13B|NFKBID|PYCARD|RAC2|INHA|PRNP|HSPD1|ZMIZ1|PIK3R1|NOTCH2|SMAD7|BCL2|MSH6|PPP3CA|ERBB2|LFNG|NDFIP1|PKN1|FYN|FLT3|MEF2C|MMP14|PRDX2|GAS6|HES1|AXL|IL6R|TGFBR2|SH3RF1|SOX11|B2M|EFNB1|FGF10|FLOT2|CD47|MYH9|SHLD1|BCL3|SYK|TP53|NCK2|CD22|…	80	0.0180547
response to tumor necrosis factor (GO:0034612)	biological_process	P1	GGT1|CASP4|CCDC3|GSDME|RPS3|COL1A1|ZFP36L2|APOA1|ZFP36L1|TDGF1|TXNDC17|GATA3|TNFSF13B|ADAMTS7|TNFRSF12A|PYCARD|POSTN|GGT7|GAS6|CHI3L1|NFE2L2|APOB|GBP2|NKX3-1|ASS1|CASP1|CRHBP|ACTN4|CLIP3|PSME1|SYK|TP53|FOXO3|KRT8|GSTP1|CD14|COMMD7|CLDN1|NFKBIA	39	0.0219046
anatomical structure regression (GO:0060033)	biological_process	P1	AMHR2|GLI2|AMH|SMAD5|LRP5|BMPR1A	6	0.0262206
membrane assembly (GO:0071709)	biological_process	P1	EPHB2|EMP2|NLGN2|CEL|PTPRD|FLOT2|S100A10|NLGN4Y|SYT11	9	0.0278537
regulation of leukocyte activation (GO:0002694)	biological_process	P1	SIRPA|KLRK1|SOX4|CD200|VSIG4|GLI2|FGR|RPS3|IL12B|LGALS1|CD28|DTX1|SOX13|PLSCR1|ZFP36L2|TICAM1|ZFP36L1|SH3KBP1|GATA3|CD38|TNFSF13B|NFKBID|PYCARD|RAC2|INHA|PRNP|HSPD1|ZMIZ1|PIK3R1|LRFN5|SHPK|SMAD7|BCL2|ERBB2|NDFIP1|PKN1|FYN|LDLR|GRN|MEF2C|MMP14|PRDX2|GAS6|HES1|AXL|TGFBR2|SH3RF1|SOX11|EFNB1|FGF10|FLOT2|CD47|SHLD1|GAB2|SYK|NCK2|CD22|IGF2|JAK3|CR1|EXOSC6|SYT11|TLR4|RAC1	64	0.0312233
positive regulation of cell projection organization (GO:0031346)	biological_process	P1	PLEK2|ROBO1|BMPR2|PFN1|NEGR1|FZD1|TWF2|SERPINF1|CDC42EP4|DPYSL3|RAC2|APOE|PIK3R1|PLXNA1|OBSL1|ITGA2|FYN|PLCE1|ITGA6|VEGFA|FSCN1|GRN|PRKD1|FUT9|PALM|ZDHHC15|CAMK2B|PTPRD|NFE2L2|ITGA3|SEMA7A|TENM3|CXCL12|CROCC|P2RX7|LRP1|IQGAP1|FAM98A|PLXNC1|VLDLR|RAC1|ZMYND8	42	0.0332723
Harderian gland development (GO:0070384)	biological_process	P1	SOX9|ALDH1A3|FGF10	3	0.0341457
cellular component disassembly (GO:0022411)	biological_process	P1	CAPN1|H1-0|MMP2|GSN|ADAMTS5|PPP1CA|FZD2|IGF1R|INSR|CAMKK2|ETS1|PRKCA|RDX|LIMA1|FZD1|ELANE|VDAC1|TWF2|SH3GL1|MMP15|APC2|C1QA|NCKAP5|STMN3|MAPRE2|DNASE2|CTRB1|C1QC|PIK3R1|PDPN|GADD45GIP1|NAV3|SMARCD3|CAMSAP3|NES|MRPL16|MID1IP1|PLEKHH2|DFFA|DDR1|CDK5|MRPL15|SREBF2|FSCN1|SVIL|MMP14|PDXP|MRPS26|RPL23|TLL1|SNAPIN|HUWE1|N6AMT1|AMER1|DDR2|MRPL23|FYCO1|TP53|SHFL|BAX|LRP1|CTNNB1	62	0.0350843
protein localization to organelle (GO:0033365)	biological_process	P1	CDH1|BMF|PKIA|WWTR1|RPS4Y1|UBL4A|RPS3A|MSN|RPL39|ECH1|PCARE|RPS3|DCLK1|YWHAB|COL1A1|YWHAH|RPL29|RPS16|YAP1|RPL35|RDX|RAB6A|RAB33B|TOMM40|SMAD3|RPS28|RPS13|TOMM40L|RPL12|RPS4X|OPHN1|RPL18A|RPLP2|RPL36|MGARP|SH3BP4|RPS5|RPL8|RPL11|RPL10A|RAC2|MAPRE2|HSPD1|PIK3R1|NOS2|BCL2|PPP3CA|RPL6|OBSL1|RPS14|FYN|CDK5|SREBF2|FERMT1|RPS24|RPS15|SOX9|RPL23|ZDHHC15|MID2|NR5A1|AIP|MBTPS1|RPL34|RPL28|RPL27A|HUWE1|MDF…	101	0.0353276
regulation of GTPase activity (GO:0043087)	biological_process	P1	ARHGAP22|KLRK1|RGS4|TBC1D9|BCAR3|AJUBA|ARRB2|ARAP2|GNB5|RDX|NEDD9|OPHN1|DOCK1|EPHA2|SH3BP4|APC2|ARHGAP1|PYCARD|ARHGEF16|STMN3|MAPRE2|ARHGAP24|ARHGEF10L|RASAL1|F11R|ERBB2|PBXIP1|PLXNA1|RIN2|RAPGEF3|CHML|ADPRH|ITGA6|VAV2|ADAP2|SIPA1|RHOG|NGEF|RGS9|RTKN|RINL|F2R|ALDH1A1|SYDE1|EPHB3|S100A10|ARHGAP42|RIN3|JUN|PREX1|RGS16|IQGAP1|PLXNC1	53	0.0364001
endothelial cell morphogenesis (GO:0001886)	biological_process	P1	PLOD3|COL18A1|STC1|HEG1|COL15A1	5	0.0390063
response to inorganic substance (GO:0010035)	biological_process	P1	CDH1|SIRPA|GSN|S100A16|CDKN1B|PPP1CA|TRPC3|RPS3|COL1A1|PPIF|SLC38A2|SLC41A1|PLSCR1|FBP1|ETS1|HNRNPA1|SERPINF1|AQP3|STK24|SYT1|C1QA|H19|PRNP|KCNK3|RASAL1|LOXL2|BCL2|PPP3CA|CPNE3|EGLN1|FYN|MEF2C|SIPA1|APEX1|CDK4|PRDX2|SYT2|AXL|COL18A1|QDPR|SNCA|CPNE5|NFE2L2|B2M|APOB|SPARC|ASS1|CRHBP|DNMT3A|KRT8|CD14|PAM|JUN|SYT11|IQGAP1|S100A13|CYBB|CLDN1|ATP2B4	59	0.0418176
metanephric nephron tubule development (GO:0072234)	biological_process	P1	WWTR1|FAT4|YAP1|LGR4|SOX9|HES1	6	0.0431013
negative regulation of transport (GO:0051051)	biological_process	P1	EPHB2|PKIA|SIRPA|APOC1|RGS4|IRS1|UBQLN2|CD200|TWIST1|IL12B|PPIF|ENHO|PLSCR1|GNB5|RAB33B|VDAC1|RHBDF1|ITGAV|NPY2R|KLF7|ERBB3|ARHGAP1|INHA|APOE|FRMD4A|BCL2|PPP3CA|NDFIP1|CDK5|ADORA1|SREBF2|FERMT1|PRKD1|GSTO1|F2R|SNCA|MDFIC|APPL1|OXTR|CD47|CRHBP|ARL6IP5|STC1|RIN3|SCAMP5|RRAD|INHBB|SYT11|RAC1	49	0.0494867
heart process (GO:0003015)	biological_process	P1	WWTR1|KCNJ5|RGS4|GSN|ATP1B1|KCNQ1|YAP1|SMAD5|SLC4A3|NPR1|TNNI3|KCNK3|EPAS1|SMAD7|TMEM38A|FXYD6|FYN|PDE4D|ADORA1|KCNK15|TAFAZZIN|GSTO1|TBX2|PPP1R13L|DSP|CXCR4|HEY2|GATA4|ATP2A3|DMD|STC1|HRC|MYLK2|SNTA1|ATP2B4|KCNIP3|EXT1	37	0.0242004
regulation of synapse assembly (GO:0051963)	biological_process	P1	EPHB2|RAB17|IL1RAPL2|MDGA1|NLGN2|LRFN3|LRFN5|SLITRK6|MEF2C|NTNG2|PTPRD|EPHA7|SNCA|AMIGO2|OXTR|EPHB3|LRFN1|CLSTN3|CLSTN1	19	0.00314676
aminoglycan metabolic process (GO:0006022)	biological_process	P1	NAGLU|B4GAT1|CHPF|HAS3|NDST4|CHST14|SGSH|ST3GAL2|CHST11|SPOCK2|B3GALT6|CHST3|HS2ST1|B3GNT3|HGSNAT|GPC1|HS6ST1|CEMIP2|VCAN|GLCE|CHI3L1|UGDH|ST3GAL6|CHSY1|B3GNT7|CHST9|B3GNT2|ST3GAL4|EXT1	29	0.00204564
positive regulation of endocytosis (GO:0045807)	biological_process	P1	DLL1|CD63|INSR|ARRB2|DAB2|HIP1|SH3GL1|ANO6|APOE|PPP3CA|ITGA2|VEGFA|AXL|SNCA|B2M|APPL1|CLIP3|SYK|BICD1|CD14|LRP1	21	0.000638827
integrin-mediated signaling pathway (GO:0007229)	biological_process	P1	CD63|FGR|TLN1|ZYX|COL3A1|LIMS2|EMP2|APOA1|NEDD9|ITGAV|ITGB5|DOCK1|ITGA8|ITGA2|ITGA6|FERMT1|PRKD1|ITGA3|SEMA7A|CD47|MYH9|SYK|CTNNA1|LAMA3|ISG15	25	2.90459e-05
negative regulation of neuron projection development (GO:0010977)	biological_process	P1	SEMA6A|EPHB2|SEMA4C|TSKU|LGALS1|SEMA6B|CD38|DPYSL3|APOE|CDK5|ADCY6|NGEF|SNAPIN|MAG|EPHA7|B2M|SEMA7A|ITM2C|SEMA4B|LRP1|VIM	21	0.0231406
regulation of muscle system process (GO:0090257)	biological_process	P1	RGS4|TRPC3|ATP1B1|KCNQ1|PRKCA|SMAD3|NPY2R|TNNI3|SMAD7|PPP3CA|TMEM38A|ITGA2|PDE4D|PLCE1|ADORA1|LMCD1|ENO1|GSTO1|CAMK2B|F2R|DSP|ANXA6|OXTR|GATA4|DMD|ARHGAP42|FOXO3|DAG1|STC1|HRC|CALCRL|MYLK2|ATP2B4	33	0.0118811
cardiac muscle contraction (GO:0060048)	biological_process	P1	KCNJ5|GSN|ATP1B1|KCNQ1|SMAD5|TNNI3|SMAD7|TMEM38A|PDE4D|ADORA1|TAFAZZIN|GSTO1|PPP1R13L|DSP|CXCR4|GATA4|DMD|STC1|HRC|MYLK2|SNTA1	21	0.0251821
positive regulation of protein localization to membrane (GO:1905477)	biological_process	P1	EPHB2|CNPY4|YWHAB|YWHAH|EPHA2|ARHGEF16|PRNP|PIK3R1|BCL2|ERBB2|FYN|CDK5|RHOG|ITGA3|MIEF2|CLIP3|TP53|TCAF1|LRP1|ATP2B4	20	0.0314541
cell-substrate junction organization (GO:0150115)	biological_process	P1	AJUBA|TLN1|SMAD3|LIMCH1|MAPRE2|PIK3R1|BCL2|FAM107A|CAMSAP3|ITGA2|ITGA6|CORO2B|VEGFA|VCL|MMP14|SLK|S100A10|LAMA3|LRP1|IQGAP1|RAC1	21	0.0020227
cell junction assembly (GO:0034329)	biological_process	P1	CDH1|EPHB2|RHOC|RAB17|ACTB|CDH19|AJUBA|TLN1|ACHE|LSR|PRKCA|NRCAM|LIMS2|FZD1|SMAD3|SPOCK2|IL1RAPL2|LIMCH1|MDGA1|KIRREL3|OPHN1|NLGN2|EPHA2|ERBB4|LRFN3|LRFN5|F11R|SMAD7|BCL2|SLITRK6|FAM107A|CAMSAP3|OBSL1|ITGA2|CDK5|ITGA6|CORO2B|CEL|VEGFA|FSCN1|CD9|VCL|MEF2C|MMP14|NTNG2|PTPRD|EPHA7|SNCA|SLK|AMIGO2|OXTR|EPHB3|S100A10|CTNNA1|LRFN1|HEG1|LAMA3|CLSTN3|ADGRL3|NLGN4Y|LRP1|IQGAP1|CLDN1|CLSTN1|CDH11|CTNNB1|RA…	67	1.14156e-06
actin filament-based movement (GO:0030048)	biological_process	P1	KCNJ5|GSN|KCNQ1|TPM4|MYL6|EMP2|LIMCH1|TNNI3|PDPN|PDE4D|ADORA1|SYNE2|DSP|WIPF3|GATA4|MYH9|ACTN4|DMD|STC1|MYLK2|SNTA1|VIM	22	0.0361019
cellular carbohydrate biosynthetic process (GO:0034637)	biological_process	P1	IRS1|PPP1CA|HAS3|NDST4|INSR|FBP1|HS2ST1|NHLRC1|B3GNT3|PDXP|FUT9|B3GNT7|IGF2|B3GNT2|EXT1	15	0.0419061
regulation of synapse organization (GO:0050807)	biological_process	P1	EPHB2|ARHGAP22|RAB17|TUBA1A|IL1RAPL2|MDGA1|NLGN2|LRFN3|PRNP|APOE|LRFN5|SLITRK6|FYN|CDK5|MEF2C|NGEF|NTNG2|ZDHHC15|CAMK2B|PTPRD|EPHA7|SNCA|AMIGO2|SPARC|OXTR|TANC2|EPHB3|DAG1|LRFN1|CLSTN3|CLSTN1|ZMYND8	32	0.0025804
regulation of synapse structure or activity (GO:0050803)	biological_process	P1	EPHB2|ARHGAP22|RAB17|TUBA1A|IL1RAPL2|MDGA1|NLGN2|LRFN3|PRNP|APOE|LRFN5|SLITRK6|FYN|CDK5|MEF2C|NGEF|NTNG2|ZDHHC15|CAMK2B|PTPRD|EPHA7|SNCA|AMIGO2|SPARC|OXTR|TANC2|EPHB3|DAG1|LRFN1|CLSTN3|CLSTN1|ZMYND8	32	0.00557117
neural crest cell differentiation (GO:0014033)	biological_process	P1	SEMA6A|SEMA4C|TWIST1|SEMA6B|ERBB4|BMPR1A|EDNRB|NRTN|SOX10|SOX9|MEF2C|HES1|ANXA6|SOX11|EFNB1|SEMA7A|JAG1|SEMA4B|EXT1	19	0.00187628
cardiac septum morphogenesis (GO:0060411)	biological_process	P1	SOX4|ROBO1|BMPR2|FZD2|GATA6|BMPR1A|DHRS3|ZFPM2|NOTCH2|SMAD7|HES1|TBX2|TGFBR2|SOX11|HEY2|GATA4|TP53|JAG1|SMAD6	19	1.75502e-05
regulation of cell junction assembly (GO:1901888)	biological_process	P1	EPHB2|RAB17|SMAD3|IL1RAPL2|LIMCH1|MDGA1|NLGN2|EPHA2|LRFN3|LRFN5|F11R|SLITRK6|FAM107A|CAMSAP3|VEGFA|VCL|MEF2C|MMP14|NTNG2|PTPRD|EPHA7|SNCA|SLK|AMIGO2|OXTR|EPHB3|S100A10|LRFN1|CLSTN3|LRP1|IQGAP1|CLDN1|CLSTN1|RAC1	34	0.000259224
glycosaminoglycan biosynthetic process (GO:0006024)	biological_process	P1	B4GAT1|CHPF|HAS3|NDST4|CHST14|ST3GAL2|CHST11|B3GALT6|CHST3|HS2ST1|B3GNT3|GPC1|HS6ST1|VCAN|GLCE|UGDH|ST3GAL6|CHSY1|B3GNT7|CHST9|B3GNT2|ST3GAL4|EXT1	23	0.000309168
aminoglycan biosynthetic process (GO:0006023)	biological_process	P1	B4GAT1|CHPF|HAS3|NDST4|CHST14|ST3GAL2|CHST11|B3GALT6|CHST3|HS2ST1|B3GNT3|GPC1|HS6ST1|VCAN|GLCE|UGDH|ST3GAL6|CHSY1|B3GNT7|CHST9|B3GNT2|ST3GAL4|EXT1	23	0.000813411
regulation of cell size (GO:0008361)	biological_process	P1	SEMA6A|DPYSL2|MSN|BMPR2|SEMA4C|RDX|SEMA6B|NRCAM|TWF2|ANO6|APOE|CDK5|VAV2|VEGFA|CDK4|MAG|EPHA7|AQP4|SEMA7A|CXCL12|P2RX7|OLFM1|SEMA4B|LRP1|TMEM123|RAC1	26	0.0170621
negative regulation of cell projection organization (GO:0031345)	biological_process	P1	SEMA6A|EPHB2|SEMA4C|TSKU|YWHAH|LGALS1|YAP1|SEMA6B|CD38|DPYSL3|PRNP|ARHGAP24|APOE|PPP3CA|TACSTD2|FYN|CDK5|ADCY6|NGEF|SNAPIN|MAG|EPHA7|ITGA3|B2M|SEMA7A|ITM2C|SEMA4B|LRP1|VIM	29	0.00319551
mesenchymal cell development (GO:0014031)	biological_process	P1	SEMA6A|SEMA4C|TWIST1|SEMA6B|ERBB4|BMPR1A|EDNRB|BCL2|NRTN|SOX10|SOX9|HES1|ANXA6|SOX11|EFNB1|HEY2|SEMA7A|JAG1|SEMA4B	19	0.000806486
cardiac muscle tissue development (GO:0048738)	biological_process	P1	VGLL4|RGS4|DLL1|MAML1|ARRB2|SIK1|GATA6|YAP1|ALPK3|WT1|BMP2|TNNI3|ERBB3|ADAMTS9|ERBB4|BMPR1A|ZFPM2|SMAD7|OBSL1|VEGFA|MEF2C|TAFAZZIN|TBX2|TGFBR2|PPP1R13L|DSP|FHOD3|HEY2|GATA4|HEG1|MYLK2	31	0.0064515
actin filament bundle assembly (GO:0051017)	biological_process	P1	RHOC|PFN1|ZYX|RDX|LIMA1|SMAD3|APOA1|LIMCH1|NEDD9|FAM171A1|ITGB5|DPYSL3|ARHGEF10L|PIK3R1|F11R|TACSTD2|FAM107A|CGNL1|RAPGEF3|CORO2B|FSCN1|PDXP|CD47|S100A10|AIF1L|SYNPO|RAC1	27	0.00140812
actin filament bundle organization (GO:0061572)	biological_process	P1	RHOC|PFN1|ZYX|RDX|LIMA1|SMAD3|APOA1|LIMCH1|NEDD9|FAM171A1|ITGB5|DPYSL3|ARHGEF10L|PIK3R1|F11R|TACSTD2|FAM107A|CGNL1|RAPGEF3|CORO2B|FSCN1|PDXP|CD47|S100A10|AIF1L|SYNPO|RAC1	27	0.00187628
regulation of protein binding (GO:0043393)	biological_process	P1	WFIKKN2|PLCL2|TRIM21|PPP1CA|ACTB|TRIB3|ARRB2|DAB2|TICAM1|BMP2|RPL11|APOE|SMARCD3|NES|CDK5|RALB|SNAPIN|B2M|CSNK1E|CFHR1|DTX3L|NKX3-1|IFIT2|ATP2A3|PTPRF|TLE5|BAX|LRP1|GNL3L|HIPK2|CDON	31	0.00305712
mucopolysaccharide metabolic process (GO:1903510)	biological_process	P1	B4GAT1|CHPF|HAS3|NDST4|CHST14|ST3GAL2|CHST11|SPOCK2|B3GALT6|CHST3|B3GNT3|CEMIP2|VCAN|GLCE|UGDH|ST3GAL6|CHSY1|B3GNT7|CHST9|B3GNT2|ST3GAL4|EXT1	22	0.00227742
synapse organization (GO:0050808)	biological_process	P1	CDH1|EPHB2|ARHGAP22|RAB17|COL4A1|IGF1R|ACTB|PCDHGC3|NFIA|INSR|ACHE|NRCAM|TUBA1A|FZD1|SPOCK2|IL1RAPL2|NTNG1|MDGA1|KIRREL3|OPHN1|ZC4H2|LRRC4C|NLGN2|GLRB|C1QA|ERBB4|LRFN3|PRNP|APOE|C1QC|LRFN5|SLITRK6|ERBB2|NEFH|OBSL1|TANC1|FYN|CDK5|CHRNB1|CEL|MEF2C|NGEF|PALM|NTNG2|ZDHHC15|SNAPIN|CAMK2B|PTPRD|EPHA7|F2R|SNCA|ITGA3|PPFIBP1|LAMB2|AMIGO2|SPARC|OXTR|TANC2|EPHB3|DAG1|LRFN1|PDZRN3|PTPRF|CLSTN3|ADGRL3|NLGN4Y…	71	1.02997e-08
negative regulation of supramolecular fiber organization (GO:1902904)	biological_process	P1	GSN|PFN1|RDX|LIMA1|TWF2|APC2|APOE|PIK3R1|F11R|NAV3|TACSTD2|CGNL1|CAMSAP3|MID1IP1|PLEKHH2|LDLR|CORO2B|SVIL|SNCA|FHOD3|EMILIN1|CLIP3|GMFB	23	0.0403881
cell-cell junction organization (GO:0045216)	biological_process	P1	CDH1|RHOC|ACTB|CDH19|TLN1|LSR|PRKCA|RDX|CSF1R|LIMS2|SMAD3|NLGN2|EPHA2|F11R|SMAD7|ANG|CAMSAP3|VEGFA|FSCN1|CD9|AJM1|VCL|F2R|DSP|CTNNA1|HEG1|CDH3|CLDN1|CDH11|CTNNB1|EXT1	31	0.00747421
regulation of metal ion transport (GO:0010959)	biological_process	P1	CCR1|RGS4|TRPC3|ATP1B1|ARRB2|GNB5|VDAC1|ANO6|SLC8B1|TSPAN13|PRNP|PLA2G1B|JPH4|BCL2|TMEM38A|STIM2|FYN|CDK5|PDE4D|RGS9|GSTO1|CAMK2B|F2R|SNCA|CXCR4|DMD|STC1|CXCL12|HRC|P2RX7|RRAD|BAX|CTNNB1	33	0.018443
entry into host (GO:0044409)	biological_process	P1	CDH1|IFITM2|TRIM21|GSN|LY6E|LGALS1|PLSCR1|ITGAV|ITGB5|EPHA2|CLEC4M|F11R|ITGA2|IFITM3|LDLR|GAS6|MID2|AXL|PPIA|ANPEP|CXCR4|DAG1|IFITM1|TRIM8|CR1|CLDN1|CTNNB1	27	0.00140812
regulation of protein localization to membrane (GO:1905475)	biological_process	P1	EPHB2|CNPY4|GSN|ACTB|YWHAB|YWHAH|DAB2|EPHA2|ARHGEF16|PRNP|NHLRC1|PIK3R1|BCL2|ERBB2|GPC1|FYN|CDK5|RHOG|MMP14|ITGA3|MIEF2|APPL1|CLIP3|TP53|DAG1|TCAF1|LRP1|TMBIM1|ATP2B4|ZMYND8	30	0.00562755
cell-substrate junction assembly (GO:0007044)	biological_process	P1	AJUBA|TLN1|SMAD3|LIMCH1|BCL2|FAM107A|CAMSAP3|ITGA2|ITGA6|CORO2B|VEGFA|VCL|MMP14|SLK|S100A10|LAMA3|LRP1|IQGAP1|RAC1	19	0.00621934
viral entry into host cell (GO:0046718)	biological_process	P1	IFITM2|TRIM21|GSN|LY6E|LGALS1|PLSCR1|ITGAV|ITGB5|EPHA2|CLEC4M|F11R|ITGA2|IFITM3|LDLR|GAS6|MID2|AXL|PPIA|ANPEP|CXCR4|DAG1|IFITM1|TRIM8|CR1|CLDN1	25	0.00199693
tissue homeostasis (GO:0001894)	biological_process	P1	ILDR2|LCA5|WWTR1|HSPB1|ACTB|LSR|YAP1|PRKCA|CSF1R|LAMA2|CD38|RAC2|EPAS1|F11R|BCL2|VEGFA|VCL|SOX9|F2R|TFF3|B2M|JAM2|LTBP3|SYK|DMD|CROCC|P2RX7|CHMP4B|CDH3|BAX|TLR4|LPCAT1|CLDN1|RAC1	34	0.0291721
ERK1 and ERK2 cascade (GO:0070371)	biological_process	P1	SEMA6A|EPHB2|SIRPA|CCR1|DSTYK|ARRB2|PRKCA|ZFP36L2|CSF1R|ZFP36L1|ITGAV|GLIPR2|BMP2|EPHA2|CAMK2N1|PYCARD|ERBB4|APOE|NOTCH2|ERBB2|SOX9|ATF3|GAS6|TNIP1|PDGFA|CHI3L1|EPHA7|F2R|FGF10|SEMA7A|OXTR|GATA4|MIR503|EMILIN1|SYK|GSTP1|LRP1|TLR4	38	0.0370849
male sex differentiation (GO:0046661)	biological_process	P1	PATZ1|AMHR2|TCF21|AMH|GATA6|SMAD5|HSD17B3|ARID5B|WT1|LGR4|GATA3|BMPR1A|INHA|SRY|ZFPM2|BCL2|LHX9|SOX9|MMP14|NR5A1|FGF10|NKX3-1|GATA4|RHOBTB3|CTNNA1|BAX|ADGRG1	27	0.00127752
negative regulation of cell adhesion (GO:0007162)	biological_process	P1	SEMA6A|CDH1|VSIG4|COL1A1|LGALS1|DTX1|RDX|APOA1|BMP2|ERBB3|PRNP|POSTN|PIK3R1|SMAD7|TACSTD2|FAM107A|ERBB2|PLXNA1|NDFIP1|CORO2B|VEGFA|CD9|SIPA1|MMP14|PRDX2|ASS1|MIR503|ACTN4|JAG1|CXCL12|CASK|JAK3|LRP1|CR1|PLXNC1|C1QTNF1	36	0.0473181
regulation of blood pressure (GO:0008217)	biological_process	P1	DDAH1|DLL1|BMPR2|ACSM3|ADRB3|PLCB3|LRP5|SMAD3|EMP2|NPR1|TNNI3|CAMK2N1|ENPEP|POSTN|EDNRB|F11R|NOS2|PDE4D|ADORA1|HSD11B2|CORO2B|GAS6|F2R|ANPEP|OXTR|ARHGAP42|COL1A2|EXT1	28	0.00436421
regulation of endocytosis (GO:0030100)	biological_process	P1	APOC1|RAB17|UBQLN2|DLL1|CD63|INSR|ARRB2|DAB2|HIP1|ITGAV|SH3GL1|OPHN1|ANO6|APOE|PPP3CA|ITGA2|VEGFA|PRKD1|AXL|SNCA|B2M|APPL1|CLIP3|SYK|RIN3|CD22|BICD1|CD14|SCAMP5|LRP1|SYT11|RAC1	32	0.00332151
positive regulation of cell development (GO:0010720)	biological_process	P1	EPHB2|ROBO1|BMPR2|NIBAN2|PTPRZ1|LIMS2|APOA1|NEDD9|TWF2|SERPINF1|BMP2|DOCK1|PRPF19|F11R|SMAD7|BCL2|PLXNA1|SMARCD3|OBSL1|SOX10|VEGFA|HES1|MAG|CAMK2B|PTPRD|CXCR4|SOX11|SEMA7A|S100A10|DAG1|CXCL12|PREX1|LRP1|CTNNB1|PLXNC1|RAC1|SPINT1	37	0.0283535
positive regulation of T cell activation (GO:0050870)	biological_process	P1	SIRPA|KLRK1|SOX4|GLI2|RPS3|IL12B|LGALS1|CD28|SOX13|GATA3|TNFSF13B|NFKBID|PYCARD|HSPD1|ZMIZ1|PIK3R1|FYN|HES1|TGFBR2|EFNB1|FLOT2|CD47|SYK|NCK2|IGF2|JAK3|CR1|RAC1	28	0.0438163
cardiac chamber morphogenesis (GO:0003206)	biological_process	P1	SOX4|ROBO1|BMPR2|FZD2|GATA6|NPY2R|BMP2|TNNI3|GATA3|BMPR1A|DHRS3|ZFPM2|NOTCH2|SMAD7|SMARCD3|MEF2C|HES1|TBX2|TGFBR2|PPP1R13L|DSP|SOX11|HEY2|GATA4|TP53|JAG1|SMAD6|HEG1	28	3.69013e-06
cellular modified amino acid metabolic process (GO:0006575)	biological_process	P1	GGT1|PLSCR1|CNDP2|PLOD3|GSTA1|SERINC5|MTHFD1|GATA3|SARDH|PLA2G1B|SHMT2|PLA2G12A|GGT6|CPQ|GGT7|GSTO1|NFE2L2|SERINC1|GLO1|ASS1|ARL6IP5|GSTM4|PDZD11|GSTP1|GATM|CPT1A|GSTA4|GSTT2|HPGDS	29	0.0105921
positive regulation of cellular protein localization (GO:1903829)	biological_process	P1	CDH1|EPHB2|CNPY4|WWTR1|MSN|YWHAB|YWHAH|YAP1|RDX|SMAD3|EPHA2|ERBB4|ARHGEF16|RAC2|PRNP|PIK3R1|BCL2|ERBB2|FYN|CDK5|SREBF2|RHOG|HUWE1|ITGA3|DTX3L|MIEF2|CLIP3|TP53|TCAF1|CROCC|BICD1|TRIM8|LRP1|GNL3L|SYT11|IQGAP1|ATP2B4	37	0.039019
positive regulation of leukocyte cell-cell adhesion (GO:1903039)	biological_process	P1	SIRPA|KLRK1|SOX4|GLI2|RPS3|IL12B|LGALS1|CD28|SOX13|ETS1|ELANE|GATA3|TNFSF13B|NFKBID|PYCARD|HSPD1|ZMIZ1|PIK3R1|FYN|HES1|TGFBR2|EFNB1|FLOT2|CD47|SYK|NCK2|IGF2|JAK3|CR1|ST3GAL4|RAC1	31	0.0283535
neural crest cell development (GO:0014032)	biological_process	P1	SEMA6A|SEMA4C|TWIST1|SEMA6B|ERBB4|BMPR1A|EDNRB|NRTN|SOX10|SOX9|HES1|ANXA6|SOX11|EFNB1|SEMA7A|JAG1|SEMA4B	17	0.00368777
stem cell development (GO:0048864)	biological_process	P1	SEMA6A|SEMA4C|TWIST1|SEMA6B|ERBB4|BMPR1A|EDNRB|NRTN|SOX10|SOX9|HES1|ANXA6|SOX11|EFNB1|SEMA7A|JAG1|SEMA4B	17	0.00539211
morphogenesis of a branching epithelium (GO:0061138)	biological_process	P1	WNT6|TCF21|COL4A1|PPP1CA|GLI2|FAT4|YAP1|LRP5|WT1|BMP2|LGR4|EPHA2|BCL2|TACSTD2|CITED1|PLXNA1|SOCS3|DDR1|SOX10|VEGFA|SOX9|MMP14|TGFBR2|PDGFA|FGF10|NKX3-1|NTN4|DAG1|CTNNB1|EXT1|SPINT1	31	0.000357071
cardiac ventricle development (GO:0003231)	biological_process	P1	SOX4|ROBO1|BMPR2|FZD2|NPY2R|TNNI3|GATA3|BMPR1A|DAND5|ZFPM2|SMAD7|SMARCD3|MEF2C|HES1|TGFBR2|PPP1R13L|DSP|SOX11|HEY2|GATA4|JAG1|SMAD6|HEG1	23	0.000719194
cellular component maintenance (GO:0043954)	biological_process	P1	IGF1R|INSR|CSF1R|OPHN1|NLGN2|PRNP|APOE|CAMSAP3|TANC1|FYN|F2R|ITGA3|CLDN1|CHCHD10|ZMYND8	15	0.00214217
skeletal system morphogenesis (GO:0048705)	biological_process	P1	MMP2|BMPR2|FGR|TWIST1|COL27A1|TSKU|COL1A1|LRP5|SERPINH1|RAB33B|CHST11|ZFAND5|SMAD3|ARID5B|SLC39A1|MTHFD1|HOXD4|DHRS3|MED12|SOX9|MEF2C|MMP14|TGFBR2|ANXA6|SOX11|CHSY1|LTBP3|FOXN3|STC1|MDFI|CTNNB1|EXT1	32	0.00483724
Notch signaling pathway (GO:0007219)	biological_process	P1	DTX4|DLL1|ROBO1|NIBAN2|MAML3|MAML1|FAT4|DTX1|ENHO|YAP1|DLK1|BEND6|BMP2|S1PR3|POSTN|ZMIZ1|NOTCH2|MAML2|TSPAN5|LFNG|SREBF2|SOX9|MMP14|HES1|TBX2|TGFBR2|FGF10|DTX3L|HEY2|JAG1|WWC1|NFKBIA	32	0.000474666
nephron development (GO:0072006)	biological_process	P1	WNT6|WWTR1|TCF21|DLL1|FAT4|YAP1|KIRREL3|WT1|BMP2|LGR4|GATA3|MTSS1|ENPEP|NOTCH2|BCL2|TACSTD2|CITED1|PLCE1|VEGFA|SOX9|MEF2C|NID1|HES1|IL6R|ITGA3|LAMB2|JAG1|IQGAP1|CTNNB1|EXT1	30	8.74658e-06
neural crest cell migration (GO:0001755)	biological_process	P1	SEMA6A|SEMA4C|TWIST1|SEMA6B|ERBB4|EDNRB|NRTN|SOX10|ANXA6|EFNB1|SEMA7A|SEMA4B	12	0.0190505
glycosaminoglycan metabolic process (GO:0030203)	biological_process	P1	NAGLU|B4GAT1|CHPF|HAS3|NDST4|CHST14|SGSH|ST3GAL2|CHST11|SPOCK2|B3GALT6|CHST3|HS2ST1|B3GNT3|HGSNAT|GPC1|HS6ST1|CEMIP2|VCAN|GLCE|UGDH|ST3GAL6|CHSY1|B3GNT7|CHST9|B3GNT2|ST3GAL4|EXT1	28	0.00125045
homeostasis of number of cells (GO:0048872)	biological_process	P1	ILDR2|SOX4|ETS1|SMAD5|ZFP36L1|CDK6|LGR4|GATA3|TNFSF13B|INHA|DNASE2|EPAS1|BCL2|KLF13|RPS14|PKN1|FLT3|VEGFA|PTBP3|RPS24|SOX9|MEF2C|PRDX2|AXL|GPRASP2|F2R|B2M|FOXO3|BAX|JAK3|ADGRG1|ISG15|HIPK2	33	0.0290554
stem cell differentiation (GO:0048863)	biological_process	P1	SEMA6A|SEMA4C|TWIST1|GATA6|YAP1|ZFP36L2|SEMA6B|FZD1|GATA3|ERBB4|BMPR1A|EDNRB|TACSTD2|EIF2AK2|NRTN|SOX10|SOX9|MEF2C|HES1|TBX2|NFE2L2|ANXA6|SOX11|EFNB1|SEMA7A|LTBP3|GATA4|PSME1|TP53|JAG1|SEMA4B|OCIAD2|EXT1	33	0.0290554
kidney epithelium development (GO:0072073)	biological_process	P1	WNT6|WWTR1|TCF21|DLL1|FAT4|YAP1|SMAD5|SMAD3|WT1|BMP2|LGR4|GATA3|MTSS1|NOTCH2|SMAD7|BCL2|TACSTD2|CITED1|VEGFA|SOX9|MEF2C|HES1|EPHA7|LAMB2|JAG1|SMAD6|IQGAP1|CTNNB1|EXT1	29	9.003e-06
platelet activation (GO:0030168)	biological_process	P1	GNG2|HSPB1|TRPC3|ACTB|C1GALT1C1|COL1A1|MYL12A|TLN1|ARRB2|PLSCR1|PRKCA|COL3A1|GP1BA|APOE|GNA14|PIK3R1|PDPN|F11R|FYN|VAV2|CD9|VCL|AXL|PPIA|PDGFA|F2R|MYH9|SYK|COL1A2|TLR4|C1QTNF1	31	4.99738e-05
cellular response to extracellular stimulus (GO:0031668)	biological_process	P1	NUAK2|BMPR2|COL1A1|TFEB|SIK1|SLC38A2|HNRNPA1|AQP3|STK24|DCTPP1|FADS1|IFI16|POSTN|BCL2|DAPL1|FAM107A|EIF2AK2|SREBF2|RALB|PRKD1|SIPA1|ATF3|GAS6|AXL|NFE2L2|TP53|FOXO3|GSTP1|TLE5|JUN|INHBB	31	0.0367763
regulation of transmembrane receptor protein serine/threonine kinase signaling pathway (GO:0090092)	biological_process	P1	HTRA3|WFIKKN2|PMEPA1|BMPR2|DAB2|CHST11|SMAD3|PCSK6|BMP2|BMPR1A|INHA|DAND5|NOTCH2|SMAD7|CITED1|BCL9L|CRIM1|GIPC1|FERMT1|NREP|GDF3|HES1|TGFBR2|ITGA3|SOX11|FGF10|GATA4|EMILIN1|TP53|SMAD6|INHBB|CILP|HIPK2	33	0.0276704
regulation of systemic arterial blood pressure (GO:0003073)	biological_process	P1	DDAH1|BMPR2|ADRB3|PLCB3|EMP2|TNNI3|CAMK2N1|ENPEP|POSTN|PDE4D|ADORA1|HSD11B2|CORO2B|GAS6|F2R|OXTR|ARHGAP42	17	0.00767605
regulation of Ras protein signal transduction (GO:0046578)	biological_process	P1	EPHB2|ROBO1|ARHGEF3|FBP1|ABCA1|COL3A1|RDX|APOA1|OPHN1|STMN3|MAPRE2|ARHGAP24|APOE|RASAL1|NOTCH2|F11R|PLCE1|CADM4|F2R|ITGA3|PSD4|FGF10|ARHGAP42|HEG1|LPAR4|ADGRG1|RAC1	27	0.0286683
cartilage development (GO:0051216)	biological_process	P1	ZNF219|BMPR2|GLI2|COL27A1|TSKU|COL1A1|SMAD5|SERPINH1|CHST11|SMAD3|BMP2|ADAMTS7|BMPR1A|LOXL2|SMAD7|SOX9|MEF2C|TGFBR2|CHI3L1|ANXA6|CHSY1|LTBP3|NFIB|STC1|SLC39A14|EXT1	26	0.0313198
negative regulation of growth (GO:0045926)	biological_process	P1	SEMA6A|VGLL4|RGS4|CDKN1B|BMPR2|SEMA4C|PPP2R1A|FBP1|SEMA6B|SMAD3|NPR1|WT1|SH3BP4|CCDC85B|RAI1|RBBP7|NOTCH2|BCL2|CDK5|SIPA1|DCBLD2|ENO1|MEG3|MAG|TGFBR2|ESR2|EPHA7|SEMA7A|TP53|WFDC1|WWC1|SEMA4B	32	0.0390063
gonad development (GO:0008406)	biological_process	P1	PATZ1|AMHR2|TCF21|AMH|ARRB2|GATA6|PCYT1B|ARID5B|WT1|GATA3|INHA|SRY|ZFPM2|BCL2|ANG|VEGFA|LHX9|SOX9|MMP14|NR5A1|NKX3-1|GATA4|RHOBTB3|CTNNA1|NRIP1|INHBB|BAX|ADGRG1	28	0.0491177
morphogenesis of a branching structure (GO:0001763)	biological_process	P1	WNT6|TCF21|COL4A1|PPP1CA|GLI2|FAT4|YAP1|LRP5|TDGF1|WT1|BMP2|LGR4|EPHA2|BCL2|TACSTD2|CITED1|PLXNA1|SOCS3|DDR1|SOX10|VEGFA|SOX9|MMP14|TGFBR2|PDGFA|EPHA7|FGF10|NKX3-1|NTN4|DAG1|CTNNB1|EXT1|SPINT1	33	0.000241768
carbohydrate biosynthetic process (GO:0016051)	biological_process	P1	ST6GALNAC1|IRS1|PGAM1|PPP1CA|HAS3|NDST4|INSR|CHST14|SIK1|FBP1|ST3GAL2|CHST11|SLC25A11|HS2ST1|NHLRC1|B3GNT3|PDXP|FAM3A|ENO1|FUT9|ATF3|SNCA|ALDOA|NLN|B3GNT7|IGF2|SLC39A14|FAM3C|CHST9|B3GNT2|ST3GAL4|SOGA1|EXT1	33	0.00204789
negative regulation of binding (GO:0051100)	biological_process	P1	WFIKKN2|TFAP4|PPP1CA|ACTB|ARRB2|ENHO|DAB2|IFI16|PPP3CA|NES|RALB|SOX11|B2M|CSNK1E|CFHR1|HEY2|NKX3-1|IFIT2|ATP2A3|PTPRF|TLE5|JUN|MDFI|BAX|GNL3L|NFKBIA	26	0.00583936
negative regulation of cell growth (GO:0030308)	biological_process	P1	SEMA6A|VGLL4|RGS4|CDKN1B|BMPR2|SEMA4C|PPP2R1A|FBP1|SEMA6B|SMAD3|NPR1|WT1|SH3BP4|CCDC85B|RBBP7|BCL2|CDK5|SIPA1|DCBLD2|ENO1|MEG3|MAG|ESR2|EPHA7|SEMA7A|TP53|WFDC1|SEMA4B	28	0.0100858
cardiac septum development (GO:0003279)	biological_process	P1	SOX4|ROBO1|BMPR2|FZD2|MAML1|GATA6|GATA3|BMPR1A|DAND5|DHRS3|ZFPM2|NOTCH2|SMAD7|HES1|TBX2|TGFBR2|SOX11|HEY2|GATA4|TP53|JAG1|SMAD6|HEG1	23	4.85399e-05
regeneration (GO:0031099)	biological_process	P1	GSN|NINJ2|CDKN1B|ANXA3|YAP1|APOA1|NINJ1|STK24|ERBB4|POSTN|BCL2|PPP3CA|FLT3|CD9|GRN|NREP|CPQ|CDK4|GAS6|AXL|MAG|TGFBR2|PTGFRN|FGF10|LAMB2|GATA4|CTNNA1|DAG1|CXCL12|GSTP1|PTPRF|CPT1A|LRP1|CLDN1	34	0.000144892
cellular response to interferon-gamma (GO:0071346)	biological_process	P1	SIRPA|TRIM21|IRF2|GSN|IL12B|RAB20|ZYX|NLRC5|OAS1|TDGF1|PARP14|CDC42EP4|NOS2|SOCS3|OAS3|CAMK2B|AQP4|B2M|GBP2|ASS1|CD47|CASP1|TP53|GBP4|TRIM8|TLR4|CLDN1|VIM	28	0.00162813
regulation of calcium ion transport (GO:0051924)	biological_process	P1	CCR1|RGS4|TRPC3|ATP1B1|ARRB2|GNB5|VDAC1|SLC8B1|TSPAN13|PRNP|PLA2G1B|JPH4|BCL2|TMEM38A|STIM2|FYN|CDK5|PDE4D|RGS9|GSTO1|CAMK2B|F2R|SNCA|CXCR4|DMD|STC1|CXCL12|HRC|P2RX7|RRAD|BAX|CTNNB1	32	0.0190876
adherens junction organization (GO:0034332)	biological_process	P1	CDH1|ACTB|CDH19|RDX|SMAD7|ANG|CAMSAP3|VEGFA|VCL|DSP|CTNNA1|CDH3|CDH11|CTNNB1	14	0.0110139
tissue remodeling (GO:0048771)	biological_process	P1	CAPN1|MMP2|EFNA2|BMPR2|IL12B|LRP5|PRKCA|CSF1R|LGR4|EPHA2|CD38|RAC2|EPAS1|NOTCH2|PPP3CA|MEF2C|MMP14|AXL|F2R|DDR2|FGF10|LTBP3|SYK|TP53|JAG1|P2RX7|BAX|TMBIM1|RAC1|EXT1	30	0.000637063
regulation of cell-substrate junction organization (GO:0150116)	biological_process	P1	SMAD3|LIMCH1|MAPRE2|PIK3R1|FAM107A|CAMSAP3|VEGFA|VCL|MMP14|SLK|S100A10|LRP1|IQGAP1|RAC1	14	0.0164502
cell fate commitment (GO:0045165)	biological_process	P1	WNT6|DLL1|GLI2|NKX6-3|IL12B|SOX13|GATA6|SMAD5|WT1|BMP2|GATA3|APC2|ERBB4|BMPR1A|EPAS1|PDPN|NOTCH2|BCL2|SOX9|MEF2C|GDF3|HES1|TBX2|IL6R|PTCH2|FGF10|HEY2|GATA4|TP53|JAG1|GAS1|CDON|EXT1	33	0.0305807
cellular polysaccharide biosynthetic process (GO:0033692)	biological_process	P1	IRS1|PPP1CA|HAS3|NDST4|INSR|HS2ST1|NHLRC1|B3GNT3|FUT9|B3GNT7|IGF2|B3GNT2|EXT1	13	0.0493797
outflow tract morphogenesis (GO:0003151)	biological_process	P1	ROBO1|BMPR2|FZD2|TWIST1|GATA6|NPY2R|BMPR1A|DHRS3|ZFPM2|VEGFA|MEF2C|HES1|TBX2|TGFBR2|SOX11|HEY2|JAG1|SMAD6|CTNNB1	19	6.69797e-05
response to interferon-gamma (GO:0034341)	biological_process	P1	SIRPA|IFITM2|TRIM21|IRF2|GSN|IL12B|RAB20|ZYX|NLRC5|OAS1|TDGF1|PARP14|CDC42EP4|NOS2|CITED1|SOCS3|IFITM3|OAS3|CAMK2B|SNCA|AQP4|B2M|GBP2|ASS1|CD47|CASP1|TP53|GBP4|SHFL|IFITM1|TRIM8|TLR4|CLDN1|VIM	34	7.47023e-05
cardiac chamber development (GO:0003205)	biological_process	P1	SOX4|ROBO1|BMPR2|FZD2|MAML1|GATA6|NPY2R|BMP2|TNNI3|GATA3|BMPR1A|DAND5|DHRS3|ZFPM2|NOTCH2|SMAD7|SMARCD3|MEF2C|HES1|TBX2|TGFBR2|PPP1R13L|DSP|SOX11|HEY2|GATA4|TP53|JAG1|SMAD6|HEG1	30	8.0811e-05
respiratory system development (GO:0060541)	biological_process	P1	TCF21|CCBE1|PPP1CA|BMPR2|GLI2|GATA6|YAP1|PLOD3|WT1|MSC|BMPR1A|EPAS1|ZFPM2|PDPN|VEGFA|SOX9|MMP14|ALDH1A3|HES1|TGFBR2|PDGFA|CHI3L1|ITGA3|SOX11|FGF10|SPARC|ASS1|LTBP3|NFIB|DAG1|HEG1|EXT1	32	0.00071475
cell-cell adhesion via plasma-membrane adhesion molecules (GO:0098742)	biological_process	P1	CDH1|PCDHGA6|FAT1|ROBO1|PCDHGC3|CDH19|FAT4|AJUBA|PCDHGB6|TRO|APOA1|NTNG1|MDGA1|KIRREL3|BMP2|PCDHGB4|LRRC4C|LRFN3|PCDHGA3|LRFN5|PCDHGB7|PCDH11X|OBSL1|PCDHGA8|PCDH18|SELL|NTNG2|MAG|TGFBR2|PTPRD|AMIGO2|TENM3|PTPRF|CDH3|CLSTN3|ADGRL3|CLDN1|CLSTN1|CDH11	39	0.00352918
connective tissue development (GO:0061448)	biological_process	P1	ZNF219|BMPR2|GLI2|COL27A1|TSKU|COL1A1|SMAD5|LRP5|SERPINH1|CHST11|SMAD3|ARID5B|WT1|BMP2|KLF7|ADAMTS7|BMPR1A|COL5A1|LOXL2|SMAD7|SOX9|MEF2C|CDK4|IL6R|TGFBR2|CHI3L1|ANXA6|AMER1|CHSY1|LTBP3|NFIB|STC1|SLC39A14|SPTLC2|EXT1	35	0.00570062
regulation of muscle contraction (GO:0006937)	biological_process	P1	ATP1B1|KCNQ1|NPY2R|TNNI3|SMAD7|TMEM38A|ITGA2|PDE4D|PLCE1|ADORA1|ENO1|GSTO1|F2R|DSP|ANXA6|OXTR|GATA4|DMD|ARHGAP42|STC1|HRC|CALCRL|MYLK2	23	0.0356098
proteoglycan metabolic process (GO:0006029)	biological_process	P1	CHPF|EXTL2|BMPR2|NDST4|CHST14|SGSH|CHST11|SPOCK2|BMP2|B3GALT6|CHST3|HS2ST1|GPC1|HS6ST1|GAL3ST4|VCAN|GLCE|UGDH|CHSY1|CHST9|CTNNB1|EXT1	22	3.84832e-05
regulation of cell shape (GO:0008360)	biological_process	P1	RHOC|MSN|FGR|RDX|CSF1R|FAM171A1|SH3KBP1|CDC42EP4|RAC2|PDPN|F11R|PLXNA1|FYN|VEGFA|RHOG|PALM|ALDOA|MYH9|RHOBTB3|DAG1|FMNL2|LIMD1|RHOBTB2|S100A13|PLXNC1|RAC1|FMNL3	27	0.000940917
regulation of viral life cycle (GO:1903900)	biological_process	P1	IFITM2|TRIM21|GSN|ZC3HAV1|LY6E|LGALS1|CD28|RNASEL|PLSCR1|OAS1|FAM111A|CHMP4C|IFI16|BCL2|EIF2AK2|IFITM3|OAS3|MID2|AXL|PPIA|TNIP1|APOBEC3F|SHFL|IFITM1|CHMP4B|TRIM8|ISG15	27	0.000940917
presynapse assembly (GO:0099054)	biological_process	P1	FZD1|IL1RAPL2|MDGA1|NLGN2|LRFN3|LRFN5|SLITRK6|CEL|NTNG2|PTPRD|SNCA|CLSTN3|NLGN4Y	13	0.00158631
telencephalon development (GO:0021537)	biological_process	P1	EPHB2|ROBO1|EFNA2|TSKU|FAT4|ANXA3|SLC38A2|COL3A1|CSF1R|KIRREL3|BMP2|CDK6|ERBB4|ZMIZ1|CDK5|ALDH1A3|HES1|SYNE2|CXCR4|SEMA7A|OXTR|NFIB|EPHB3|CXCL12|BAX|LRP1|ADGRG1|HSD3B2|CDON|ATP2B4|EXT1	31	0.0236962
regulation of chemotaxis (GO:0050920)	biological_process	P1	SEMA6A|CCR1|KLRK1|PLA2G7|ROBO1|ZSWIM5|HSPB1|BMPR2|SEMA4C|SEMA6B|CSF1R|SMAD3|ELANE|ANO6|SLC8B1|RAC2|ZSWIM4|ITGA2|VEGFA|PRKD1|GAS6|IL6R|CXCR4|FGF10|SEMA7A|CXCL12|RIN3|GSTP1|SEMA4B|RAC1	30	0.0261465
lung development (GO:0030324)	biological_process	P1	TCF21|CCBE1|PPP1CA|BMPR2|GLI2|GATA6|YAP1|PLOD3|BMPR1A|EPAS1|ZFPM2|PDPN|VEGFA|SOX9|MMP14|HES1|TGFBR2|PDGFA|CHI3L1|ITGA3|SOX11|FGF10|SPARC|LTBP3|NFIB|DAG1|HEG1|EXT1	28	0.00162813
respiratory tube development (GO:0030323)	biological_process	P1	TCF21|CCBE1|PPP1CA|BMPR2|GLI2|GATA6|YAP1|PLOD3|BMPR1A|EPAS1|ZFPM2|PDPN|VEGFA|SOX9|MMP14|HES1|TGFBR2|PDGFA|CHI3L1|ITGA3|SOX11|FGF10|SPARC|LTBP3|NFIB|DAG1|HEG1|EXT1	28	0.00234359
cardiac ventricle morphogenesis (GO:0003208)	biological_process	P1	SOX4|NPY2R|TNNI3|GATA3|BMPR1A|ZFPM2|SMAD7|SMARCD3|MEF2C|TGFBR2|PPP1R13L|DSP|SOX11|HEY2|GATA4|JAG1|HEG1	17	0.000696647
postsynapse organization (GO:0099173)	biological_process	P1	EPHB2|ARHGAP22|IGF1R|ACTB|INSR|OPHN1|NLGN2|GLRB|PRNP|APOE|NEFH|TANC1|FYN|CDK5|CHRNB1|CEL|NGEF|NTNG2|ZDHHC15|CAMK2B|PTPRD|EPHA7|ITGA3|TANC2|EPHB3|LRFN1|NLGN4Y|ZMYND8	28	0.00125045
positive regulation of epithelial cell migration (GO:0010634)	biological_process	P1	CCBE1|HSPB1|BMPR2|PFN1|ANXA3|ETS1|PRKCA|TDGF1|GLIPR2|DOCK1|GATA3|MAPRE2|RIN2|ITGA2|VEGFA|GRN|PRKD1|SOX9|TGFBR2|NFE2L2|ITGA3|FGF10|SPARC|RAC1|JCAD	25	0.0229537
neuron projection extension (GO:1990138)	biological_process	P1	NDN|SEMA6A|DPYSL2|TNN|BMPR2|SEMA4C|DCLK1|SEMA6B|NRCAM|TWF2|SYT1|LLPH|APOE|POSTN|RASAL1|PLXNA1|DDR1|CDK5|VEGFA|VCL|SYT2|MAG|CPNE5|CXCR4|FLRT1|LAMB2|SEMA7A|CXCL12|OLFM1|SEMA4B|LRP1|IQGAP1|CTNNB1	33	2.16608e-05
neuron migration (GO:0001764)	biological_process	P1	NDN|SEMA6A|TNN|TWIST1|DCLK1|COL3A1|NRCAM|NTNG1|MDGA1|KIRREL3|GATA3|ERBB4|ZMIZ1|FYN|CDK5|VEGFA|MEF2C|NTNG2|GAS6|AXL|SH3RF1|CAMK2B|CXCR4|ITGA3|CXCL12|ASTN2|ADGRL3|BAX|ADGRG1|RAC1	30	2.75564e-05
negative regulation of viral process (GO:0048525)	biological_process	P1	IFITM2|TRIM21|GSN|ZC3HAV1|LY6E|RNASEL|PLSCR1|OAS1|FAM111A|IFI16|EIF2AK2|IFITM3|OAS3|MID2|PPIA|TNIP1|APOBEC3F|SHFL|IFITM1|TRIM8|ISG15	21	0.000156428
synapse assembly (GO:0007416)	biological_process	P1	CDH1|EPHB2|RAB17|ACHE|NRCAM|FZD1|SPOCK2|IL1RAPL2|MDGA1|KIRREL3|NLGN2|ERBB4|LRFN3|LRFN5|SLITRK6|OBSL1|CDK5|CEL|MEF2C|NTNG2|PTPRD|EPHA7|SNCA|AMIGO2|OXTR|EPHB3|LRFN1|CLSTN3|ADGRL3|NLGN4Y|CLSTN1	31	0.000357071
positive regulation of developmental growth (GO:0048639)	biological_process	P1	PPIB|DLL1|BMPR2|INSR|GATA6|YAP1|TWF2|WT1|SYT1|ERBB4|BMPR1A|RASAL1|ZFPM2|SMAD7|BCL2|VEGFA|MEF2C|SYT2|TBX2|TGFBR2|CPNE5|CXCR4|HEY2|SEMA7A|CXCL12|IGF2|LRP1	27	0.00596195
organ growth (GO:0035265)	biological_process	P1	VGLL4|RGS4|DLL1|COL27A1|TSKU|GATA6|YAP1|WT1|ERBB4|BMPR1A|ZFPM2|BCL2|SOX9|MEF2C|TBX2|TGFBR2|ANXA6|DDR2|FGF10|HEY2|GATA4|STC1|IGF2|HEG1|WWC1|EXT1	26	0.00804495
contractile actin filament bundle assembly (GO:0030038)	biological_process	P1	RHOC|PFN1|ZYX|SMAD3|APOA1|LIMCH1|FAM171A1|ITGB5|ARHGEF10L|PIK3R1|F11R|TACSTD2|CGNL1|RAPGEF3|CORO2B|CD47|S100A10|RAC1	18	0.0176574
stress fiber assembly (GO:0043149)	biological_process	P1	RHOC|PFN1|ZYX|SMAD3|APOA1|LIMCH1|FAM171A1|ITGB5|ARHGEF10L|PIK3R1|F11R|TACSTD2|CGNL1|RAPGEF3|CORO2B|CD47|S100A10|RAC1	18	0.0176574
nephron epithelium development (GO:0072009)	biological_process	P1	WNT6|WWTR1|TCF21|DLL1|FAT4|YAP1|WT1|BMP2|LGR4|GATA3|MTSS1|NOTCH2|BCL2|TACSTD2|CITED1|VEGFA|SOX9|MEF2C|HES1|LAMB2|JAG1|IQGAP1|CTNNB1|EXT1	24	4.86323e-05
transforming growth factor beta receptor signaling pathway (GO:0007179)	biological_process	P1	HTRA3|WFIKKN2|AMHR2|PMEPA1|ARRB2|ZYX|SMAD5|COL3A1|DAB2|CHST11|SMAD3|ITGB5|USP9Y|BMPR1A|DAND5|ZMIZ1|F11R|SMAD7|CITED1|BCL9L|GIPC1|FERMT1|NREP|TGFBR2|ITGA3|SOX11|APPL1|LTBP3|EMILIN1|TP53|SMAD6|COL1A2|JUN|HIPK2|TGFBRAP1	35	0.000204732
osteoblast differentiation (GO:0001649)	biological_process	P1	WWTR1|TNN|BMPR2|GLI2|TWIST1|COL1A1|TPM4|ACHE|YAP1|SMAD5|LRP5|FZD1|SMAD3|BMP2|CDK6|LGR4|EPHA2|BMPR1A|CITED1|SMOC1|CRIM1|RPS15|ID3|PRKD1|SOX9|MEF2C|VCAN|IL6R|SOX11|DDR2|SEMA7A|JAG1|IFITM1|IGF2|SMAD6|LIMD1	36	0.000290728
glial cell development (GO:0021782)	biological_process	P1	SOX4|GSN|DLL1|PHGDH|CDK6|C1QA|MED12|MYRF|BACE2|CDK5|SOX10|LDLR|GRN|MAG|SOX11|LAMB2|DAG1|NCMAP|GSTP1|LRP1|TLR4|VIM	22	0.00129824
movement in host environment (GO:0052126)	biological_process	P1	CDH1|IFITM2|TRIM21|GSN|LY6E|LGALS1|PLSCR1|ITGAV|ITGB5|EPHA2|CLEC4M|CHMP4C|F11R|ITGA2|IFITM3|LDLR|GAS6|MID2|AXL|PPIA|ANPEP|CXCR4|DAG1|IFITM1|CHMP4B|TRIM8|CR1|CLDN1|CTNNB1	29	0.00223481
cellular response to BMP stimulus (GO:0071773)	biological_process	P1	HTRA3|AMHR2|BMPR2|AMH|GATA6|SMAD5|SMAD3|PCSK6|BMP2|USP9Y|GATA3|ADAMTS7|BMPR1A|DAND5|NOTCH2|SMAD7|CRIM1|SOX9|GDF3|HES1|ITGA3|SOX11|GATA4|SMAD6|HIPK2|EXT1|SPINT1	27	0.00393734
response to BMP (GO:0071772)	biological_process	P1	HTRA3|AMHR2|BMPR2|AMH|GATA6|SMAD5|SMAD3|PCSK6|BMP2|USP9Y|GATA3|ADAMTS7|BMPR1A|DAND5|NOTCH2|SMAD7|CRIM1|SOX9|GDF3|HES1|ITGA3|SOX11|GATA4|SMAD6|HIPK2|EXT1|SPINT1	27	0.00393734
cortical cytoskeleton organization (GO:0030865)	biological_process	P1	RHOC|TLN1|RAC2|CDK5|RHOG|RTKN|FHOD3|RHOBTB3|FMNL2|RHOBTB2|RAC1|FMNL3	12	0.0283921
glycoprotein metabolic process (GO:0009100)	biological_process	P1	ST6GALNAC1|B4GAT1|CHPF|EXTL2|GALNT18|GALNT16|BMPR2|TET1|C1GALT1C1|NDST4|CHST14|SGSH|ST8SIA5|ST3GAL2|CHST11|ST6GALNAC4|SPOCK2|PLOD3|PCSK6|POGLUT3|BMP2|B3GALT6|CHST3|ADAMTS9|GALNT1|HS2ST1|BCL2|B3GNT3|EDEM2|BACE2|GPC1|MGAT5|HS6ST1|GAL3ST4|VCAN|GALNT17|FUT9|TNIP1|GLCE|UGDH|ST3GAL6|CHSY1|GBGT1|POGLUT2|B3GNT7|ITM2C|CHST9|B3GNT2|XXYLT1|JAK3|ST3GAL4|ITM2B|DPY19L4|CTNNB1|TRAK1|EXT1	56	0.00102082
regulation of viral genome replication (GO:0045069)	biological_process	P1	IFITM2|ZC3HAV1|CD28|RNASEL|PLSCR1|OAS1|FAM111A|IFI16|BCL2|EIF2AK2|IFITM3|OAS3|PPIA|TNIP1|APOBEC3F|SHFL|IFITM1|ISG15	18	0.0017283
blood circulation (GO:0008015)	biological_process	P1	DDAH1|KCNJ5|RGS4|FGFBP3|GSN|DLL1|BMPR2|ATP1B1|ACSM3|KCNQ1|ADRB3|PLCB3|SMAD5|LRP5|SMAD3|EMP2|PLOD3|SLC4A3|NPR1|TNNI3|CAMK2N1|CD38|KCNK3|ENPEP|APOE|POSTN|EPAS1|EDNRB|F11R|SMAD7|NOS2|TMEM38A|FXYD6|PDE4D|ADORA1|ADCY6|HSD11B2|CORO2B|KCNK15|VEGFA|TAFAZZIN|GSTO1|GAS6|TBX2|PPP1R13L|F2R|DSP|ANPEP|CXCR4|HEY2|CYB5R3|OXTR|GATA4|ATP2A3|DMD|ARHGAP42|STC1|CXCL12|HRC|COL1A2|MYLK2|SNTA1|ATP2B4|KCNIP3|EXT1	65	0.00226963
positive regulation of cell-substrate adhesion (GO:0010811)	biological_process	P1	LIMS2|SMAD3|EMP2|SPOCK2|APOA1|NEDD9|NPY2R|DOCK1|CDK6|RIN2|ITGA6|VEGFA|FERMT1|PLEKHA2|NID1|ITGA3|EMILIN1|S100A10|DAG1|PREX1|IQGAP1|RAC1	22	0.00438445
regulation of viral process (GO:0050792)	biological_process	P1	IFITM2|TRIM21|GSN|ZC3HAV1|LY6E|LGALS1|CD28|RNASEL|PLSCR1|OAS1|FAM111A|CHMP4C|IFI16|BCL2|EIF2AK2|IFITM3|OAS3|MID2|AXL|PPIA|TNIP1|CXCR4|MDFIC|APOBEC3F|SHFL|IFITM1|CHMP4B|TRIM8|ISG15	29	0.00606506
regulation of neuron differentiation (GO:0045664)	biological_process	P1	ZFHX3|DPYSL2|DLL1|GLI2|YWHAH|DTX1|NAP1L2|ZNF536|NRCAM|BEND6|BMP2|ZC4H2|PRPF19|EDNRB|BCL2|ZHX2|NREP|SOX9|MEF2C|HES1|MAG|SOX11|B2M|CSNK1E|HEY2|JAG1|CXCL12|GPRC5B|CDON	29	0.00699578
regulation of system process (GO:0044057)	biological_process	P1	KCNJ5|RGS4|NPTXR|BMPR2|TRPC3|ATP1B1|KCNQ1|PRKCA|SMAD3|EMP2|APOA1|SLC4A3|NPR1|NPY2R|TNNI3|SH3GL1|NLGN2|CD38|INHA|KCNK3|APOE|EPAS1|EDNRB|SMAD7|PPP3CA|TMEM38A|MYRF|FXYD6|ITGA2|PDE4D|PLCE1|SOX10|ADORA1|CORO2B|KCNK15|LMCD1|ENO1|GSTO1|GAS6|TBX2|MAG|CAMK2B|F2R|DSP|ANXA6|JAM2|FGF10|HEY2|NKX3-1|OXTR|GATA4|CRHBP|ATP2A3|DMD|ARHGAP42|FOXO3|DAG1|STC1|NCMAP|HRC|CALCRL|INHBB|MYLK2|SNTA1|C1QTNF1|ATP2B4|KCNIP3|ZM…	68	0.00776218
regulation of presynapse assembly (GO:1905606)	biological_process	P1	IL1RAPL2|MDGA1|LRFN3|LRFN5|SLITRK6|NTNG2|PTPRD|SNCA|CLSTN3	9	0.0105779
regulation of presynapse organization (GO:0099174)	biological_process	P1	IL1RAPL2|MDGA1|LRFN3|LRFN5|SLITRK6|NTNG2|PTPRD|SNCA|CLSTN3	9	0.0105779
regulation of epithelial cell migration (GO:0010632)	biological_process	P1	PATZ1|CCBE1|HSPB1|BMPR2|PFN1|ANXA3|ETS1|PRKCA|EMP2|TDGF1|GLIPR2|SERPINF1|DOCK1|EPHA2|GATA3|ADAMTS9|MAPRE2|APOE|TACSTD2|RIN2|ITGA2|VEGFA|GRN|PRKD1|SOX9|MEF2C|TGFBR2|NFE2L2|ITGA3|MCC|FGF10|SPARC|MIR503|STC1|ATP2B4|RAC1|JCAD	37	0.0131637
negative regulation of cell-substrate adhesion (GO:0010812)	biological_process	P1	COL1A1|LGALS1|POSTN|PIK3R1|TACSTD2|FAM107A|CORO2B|MMP14|MIR503|ACTN4|JAG1|CASK|LRP1	13	0.017847
chondroitin sulfate metabolic process (GO:0030204)	biological_process	P1	CHPF|CHST11|SPOCK2|B3GALT6|CHST3|VCAN|UGDH|CHSY1|CHST9	9	0.0377527
biomineral tissue development (GO:0031214)	biological_process	P1	FAM20C|WNT6|CCR1|BMPR2|FGR|TWIST1|COL1A1|SMAD3|BMP2|LGR4|ANO6|BMPR1A|SOX9|MEF2C|GAS6|ANKH|DDR2|TUFT1|HEY2|LTBP3|COL1A2|P2RX7|ISG15	23	0.0431013
biomineralization (GO:0110148)	biological_process	P1	FAM20C|WNT6|CCR1|BMPR2|FGR|TWIST1|COL1A1|SMAD3|BMP2|LGR4|ANO6|BMPR1A|SOX9|MEF2C|GAS6|ANKH|DDR2|TUFT1|HEY2|LTBP3|COL1A2|P2RX7|ISG15	23	0.0491177
cell junction organization (GO:0034330)	biological_process	P1	CDH1|EPHB2|ARHGAP22|RHOC|RAB17|COL4A1|IGF1R|ACTB|PCDHGC3|NFIA|CDH19|AJUBA|INSR|TLN1|ACHE|LSR|PRKCA|RDX|NRCAM|TUBA1A|CSF1R|LIMS2|FZD1|SMAD3|SPOCK2|IL1RAPL2|LIMCH1|NTNG1|MDGA1|KIRREL3|OPHN1|ZC4H2|LRRC4C|NLGN2|EPHA2|GLRB|C1QA|ERBB4|LRFN3|MAPRE2|PRNP|APOE|C1QC|PIK3R1|LRFN5|F11R|SMAD7|BCL2|ANG|SLITRK6|FAM107A|ERBB2|NEFH|CAMSAP3|OBSL1|TANC1|ITGA2|FYN|CDK5|CHRNB1|ITGA6|CORO2B|CEL|VEGFA|FSCN1|CD9|AJM1|VC…	114	2.58545e-12
cell-substrate adhesion (GO:0031589)	biological_process	P1	TNN|CD63|COL1A1|AJUBA|BCAM|LGALS1|ZYX|COL3A1|LIMS2|SMAD3|EMP2|SPOCK2|APOA1|LIMCH1|NEDD9|NTNG1|ITGAV|NPY2R|ITGB5|DOCK1|ITGA8|CDK6|ADAMTS9|ANTXR1|RAC2|POSTN|PIK3R1|PDPN|BCL2|TACSTD2|FAM107A|SGCE|CAMSAP3|RIN2|DDR1|ITGA2|CDK5|ITGA6|CORO2B|VEGFA|FERMT1|VCL|MMP14|PLEKHA2|NID1|NTNG2|GAS6|AXL|ITGA3|SLK|LAMB2|NTN4|MIR503|EMILIN1|ACTN4|EPHB3|S100A10|JAG1|DAG1|SMAD6|CASK|PREX1|NID2|LRP1|IQGAP1|RAC1	66	2.52167e-09
heart valve morphogenesis (GO:0003179)	biological_process	P1	SOX4|ROBO1|BMPR2|TWIST1|BMP2|GATA3|ADAMTS9|BMPR1A|NOTCH2|SOX9|MEF2C|TGFBR2|HEY2|GATA4|EMILIN1|JAG1|SMAD6|OLFM1	18	2.27815e-06
cell differentiation involved in kidney development (GO:0061005)	biological_process	P1	WWTR1|TCF21|FAT4|YAP1|WT1|LGR4|GATA3|MTSS1|NOTCH2|CITED1|MEF2C|HES1|AMER1|LAMB2|JAG1|IQGAP1|CTNNB1|EXT1	18	1.04651e-05
heart development (GO:0007507)	biological_process	P1	VGLL4|SOX4|RGS4|DLL1|ROBO1|CDKN1B|BMPR2|FZD2|GLI2|TWIST1|MAML1|FAT4|INSR|ARRB2|SIK1|GATA6|YAP1|COL3A1|ALPK3|SMAD3|ZFP36L1|TDGF1|WT1|NPY2R|BMP2|TNNI3|PDLIM3|MTHFD1|GATA3|ERBB3|ADAMTS9|ERBB4|BMPR1A|DAND5|COL5A1|DHRS3|ZMIZ1|ZFPM2|NOTCH2|SMAD7|MED12|ERBB2|SMARCD3|OBSL1|PLCE1|VEGFA|ADAP2|ID3|SOX9|MEF2C|TAFAZZIN|SYPL2|HES1|TBX2|TGFBR2|PPP1R13L|DSP|ITGA3|SOX11|FHOD3|HEY2|NKX3-1|SPARC|OXTR|GATA4|EMILIN1|…	76	2.0349e-05
glomerulus development (GO:0032835)	biological_process	P1	WWTR1|TCF21|KIRREL3|WT1|LGR4|MTSS1|ENPEP|NOTCH2|BCL2|PLCE1|MEF2C|NID1|HES1|IL6R|LAMB2|JAG1|IQGAP1|EXT1	18	2.21015e-05
heart valve development (GO:0003170)	biological_process	P1	SOX4|ROBO1|BMPR2|TWIST1|BMP2|GATA3|ADAMTS9|BMPR1A|NOTCH2|SOX9|MEF2C|TGFBR2|HEY2|GATA4|EMILIN1|JAG1|SMAD6|OLFM1	18	2.21015e-05
renal tubule development (GO:0061326)	biological_process	P1	WNT6|WWTR1|TCF21|COL4A1|DLL1|FAT4|YAP1|WT1|BMP2|LGR4|GATA3|MTSS1|NOTCH2|BCL2|TACSTD2|CITED1|VEGFA|SOX9|MEF2C|HES1|JAG1|CTNNB1	22	3.84832e-05
proteoglycan biosynthetic process (GO:0030166)	biological_process	P1	CHPF|EXTL2|BMPR2|NDST4|CHST14|CHST11|B3GALT6|CHST3|HS2ST1|HS6ST1|GAL3ST4|VCAN|GLCE|UGDH|CHSY1|CHST9|CTNNB1|EXT1	18	4.60469e-05
ameboidal-type cell migration (GO:0001667)	biological_process	P1	SEMA6A|PATZ1|CCBE1|ROBO1|HSPB1|BMPR2|SEMA4C|TWIST1|PFN1|ANXA3|ETS1|LRP5|PRKCA|SEMA6B|ZFAND5|EMP2|ARID5B|APOA1|AMOTL2|ZEB2|TDGF1|GLIPR2|SERPINF1|DOCK1|EPHA2|GATA3|ADAMTS9|ERBB4|MAPRE2|APOE|EDNRB|LOXL2|TACSTD2|RIN2|GIPC1|NRTN|PKN1|ITGA2|SOX10|VEGFA|GRN|FERMT1|PRKD1|SOX9|MEF2C|TGFBR2|NFE2L2|ANXA6|ITGA3|MCC|DDR2|EFNB1|FGF10|SPARC|SYDE1|APPL1|SEMA7A|MYH9|MIR503|STC1|SEMA4B|ATP2B4|RAC1|JCAD	64	8.80583e-05
nephron tubule development (GO:0072080)	biological_process	P1	WNT6|WWTR1|TCF21|DLL1|FAT4|YAP1|WT1|BMP2|LGR4|GATA3|MTSS1|NOTCH2|BCL2|TACSTD2|CITED1|VEGFA|SOX9|MEF2C|HES1|JAG1|CTNNB1	21	9.36656e-05
circulatory system process (GO:0003013)	biological_process	P1	DDAH1|WWTR1|KCNJ5|RGS4|FGFBP3|GSN|DLL1|ATP8A1|BMPR2|ATP1B1|ACSM3|KCNQ1|ADRB3|PLCB3|INSR|ABCG2|SLC38A2|YAP1|SMAD5|LRP5|SMAD3|EMP2|PLOD3|SLC4A3|NPR1|TNNI3|CAMK2N1|CD38|KCNK3|ENPEP|APOE|POSTN|EPAS1|EDNRB|SLC44A1|F11R|SMAD7|NOS2|TMEM38A|FXYD6|FYN|PDE4D|ADORA1|ADCY6|HSD11B2|SLC29A4|CORO2B|KCNK15|VEGFA|TAFAZZIN|GSTO1|GAS6|TBX2|PPP1R13L|F2R|DSP|ANPEP|SLC38A1|CXCR4|SLC29A2|HEY2|CYB5R3|OXTR|GATA4|ATP2A3|D…	79	0.000115748
mesenchymal cell differentiation (GO:0048762)	biological_process	P1	SEMA6A|WWTR1|TCF21|SEMA4C|TWIST1|COL1A1|DAB2|SEMA6B|SMAD3|GLIPR2|BMP2|GATA3|ERBB4|BMPR1A|EDNRB|LOXL2|PDPN|SMAD7|BCL2|BCL9L|NRTN|SOX10|SOX9|MEF2C|HES1|TGFBR2|ANXA6|AMER1|SOX11|EFNB1|FGF10|HEY2|SEMA7A|JAG1|DAG1|OLFM1|SEMA4B|CTNNB1|EXT1	39	0.000133938
extracellular matrix assembly (GO:0085029)	biological_process	P1	HAS3|SMAD3|PLOD3|NTNG1|ANTXR1|SOX9|NTNG2|GAS6|LAMB2|NTN4|LTBP3|EMILIN1|DAG1|COL1A2	14	0.000189085
atrioventricular valve morphogenesis (GO:0003181)	biological_process	P1	SOX4|BMPR2|TWIST1|BMP2|BMPR1A|TGFBR2|HEY2|GATA4|SMAD6|OLFM1	10	0.000193769
regulation of osteoblast differentiation (GO:0045667)	biological_process	P1	WWTR1|TNN|BMPR2|TWIST1|YAP1|SMAD5|LRP5|SMAD3|BMP2|CDK6|BMPR1A|CITED1|SMOC1|CRIM1|ID3|PRKD1|SOX9|MEF2C|IL6R|SOX11|DDR2|JAG1|IFITM1|SMAD6|LIMD1	25	0.000231259
atrioventricular valve development (GO:0003171)	biological_process	P1	SOX4|BMPR2|TWIST1|BMP2|BMPR1A|TGFBR2|HEY2|GATA4|SMAD6|OLFM1	10	0.000290728
epithelial cell differentiation involved in kidney development (GO:0035850)	biological_process	P1	WWTR1|FAT4|YAP1|WT1|GATA3|MTSS1|NOTCH2|CITED1|MEF2C|LAMB2|JAG1|IQGAP1|CTNNB1|EXT1	14	0.000312762
chondrocyte differentiation (GO:0002062)	biological_process	P1	ZNF219|BMPR2|GLI2|COL27A1|TSKU|SERPINH1|CHST11|SMAD3|BMP2|ADAMTS7|BMPR1A|LOXL2|SMAD7|SOX9|MEF2C|TGFBR2|ANXA6|CHSY1|LTBP3|NFIB|SLC39A14|EXT1	22	0.000383478
negative regulation of viral genome replication (GO:0045071)	biological_process	P1	IFITM2|ZC3HAV1|RNASEL|PLSCR1|OAS1|FAM111A|IFI16|EIF2AK2|IFITM3|OAS3|TNIP1|APOBEC3F|SHFL|IFITM1|ISG15	15	0.000388313
muscle system process (GO:0003012)	biological_process	P1	KCNJ5|RGS4|GSN|TRPC3|ATP1B1|MYL12A|KCNQ1|TPM4|MYL6|TLN1|GATA6|SMAD5|PRKCA|SMAD3|NPY2R|SNTB1|TNNI3|ITGB5|CD38|EDNRB|MYL7|SMAD7|PPP3CA|TMEM38A|ITGA2|CHRNB1|PDE4D|PLCE1|DTNA|ADORA1|LMCD1|VCL|MYOM3|TAFAZZIN|ENO1|GSTO1|TBX2|PPP1R13L|SCN7A|CAMK2B|F2R|DSP|ANXA6|CXCR4|ALDOA|HEY2|OXTR|GATA4|DMD|ARHGAP42|FOXO3|DAG1|STC1|HRC|CALCRL|GATM|MYLK2|SNTA1|VIM|ATP2B4	60	0.000464582
regulation of Notch signaling pathway (GO:0008593)	biological_process	P1	DLL1|ROBO1|NIBAN2|MAML3|MAML1|DTX1|ENHO|YAP1|DLK1|BEND6|POSTN|ZMIZ1|MAML2|TSPAN5|LFNG|SREBF2|MMP14|HES1|FGF10|HEY2|JAG1|NFKBIA	22	0.000596053
regulation of cell-matrix adhesion (GO:0001952)	biological_process	P1	SMAD3|EMP2|LIMCH1|CDK6|POSTN|PIK3R1|BCL2|FAM107A|CAMSAP3|RIN2|DDR1|VEGFA|FERMT1|VCL|MMP14|PLEKHA2|SLK|S100A10|JAG1|DAG1|CASK|LRP1|IQGAP1|RAC1	24	0.000657259
response to type I interferon (GO:0034340)	biological_process	P1	IFITM2|IRF2|IFI6|IFI35|TRIM56|RNASEL|NLRC5|OAS1|USP18|IFIT3|IFNAR1|SHMT2|IFITM3|OAS3|GBP2|IFIT2|IFNAR2|SHFL|IFITM1|ISG15|TYK2	21	0.000729179
endocytosis (GO:0006897)	biological_process	P1	CLTB|APOC1|DPYSL2|GSN|RAB17|UBQLN2|DLL1|LY75|CD63|LRP10|INSR|ACHE|ARRB2|LRP5|DAB2|XKR8|SCARA3|APOA1|HIP1|COLEC12|ITGAV|SH3KBP1|SH3GL1|OPHN1|DOCK1|NLGN2|SH3BP4|CLEC4M|SYT1|ANO6|PYCARD|RAC2|SYNJ2|APOE|LOXL2|PPP3CA|RIN2|ITGA2|CDK5|LDLR|CEL|VEGFA|CD9|STAB1|PRKD1|NOSTRIN|RHOG|SYT2|AXL|CFI|TGFBR2|LOXL4|RINL|SNCA|SSC4D|MAPKAPK3|B2M|CSNK1E|APOB|SPARC|APPL1|MYH9|CLIP3|SYK|LDLRAD3|STEAP2|RIN3|CD22|BICD1|CD…	81	0.000775981
positive regulation of epithelial to mesenchymal transition (GO:0010718)	biological_process	P1	WWTR1|TWIST1|COL1A1|DAB2|SMAD3|GLIPR2|BMP2|LOXL2|PDPN|BCL9L|TGFBR2|JAG1|OLFM1|CTNNB1	14	0.000804513
presynapse organization (GO:0099172)	biological_process	P1	FZD1|IL1RAPL2|MDGA1|NLGN2|LRFN3|LRFN5|SLITRK6|CEL|NTNG2|SNAPIN|PTPRD|SNCA|CLSTN3|NLGN4Y	14	0.000804513
SMAD protein signal transduction (GO:0060395)	biological_process	P1	WWTR1|SMAD5|DAB2|SMAD3|BMP2|BMPR1A|INHA|ZMIZ1|SMAD7|CITED1|GDF3|SMAD6|JUN|INHBB|VIM|CILP|HIPK2	17	0.00133966
semi-lunar valve development (GO:1905314)	biological_process	P1	ROBO1|BMPR2|TWIST1|BMP2|GATA3|NOTCH2|SOX9|HEY2|GATA4|EMILIN1|JAG1|SMAD6	12	0.00135033
substrate adhesion-dependent cell spreading (GO:0034446)	biological_process	P1	LIMS2|APOA1|NEDD9|NTNG1|ITGAV|DOCK1|ITGA8|ANTXR1|POSTN|PIK3R1|PDPN|TACSTD2|NTNG2|AXL|LAMB2|NTN4|ACTN4|EPHB3|S100A10|PREX1|RAC1	21	0.0020227
mammary gland development (GO:0030879)	biological_process	P1	CAPN1|ROBO1|GLI2|PYGO2|LRP5|DEAF1|CSF1R|TDGF1|EPHA2|GATA3|ERBB4|NCOR2|DDR1|ITGA2|VEGFA|SOX9|TBX2|APRT|TGFBR2|FGF10|UPRT|OXTR|PAM|BAX	24	0.00202669
regulation of cell development (GO:0060284)	biological_process	P1	SEMA6A|EPHB2|DLL1|ROBO1|BMPR2|NIBAN2|SEMA4C|PTPRZ1|YWHAH|YAP1|SEMA6B|LIMS2|APOA1|NEDD9|TWF2|SERPINF1|BMP2|DOCK1|PRPF19|BMPR1A|S1PR3|POSTN|EDNRB|NOTCH2|F11R|SMAD7|BCL2|PPP3CA|TACSTD2|PLXNA1|SMARCD3|OBSL1|CDK5|SOX10|LDLR|VEGFA|GRN|VCL|HES1|MAG|CAMK2B|PTPRD|EPHA7|CXCR4|SOX11|B2M|HEY2|SEMA7A|ACTN4|S100A10|TP53|CTNNA1|DAG1|CXCL12|PREX1|SEMA4B|LRP1|CTNNB1|PLXNC1|RAC1|SPINT1	61	0.00219993
biological process involved in interaction with host (GO:0051701)	biological_process	P1	CDH1|IFITM2|TRIM21|GSN|INSR|LY6E|LGALS1|PLSCR1|ITGAV|ITGB5|EPHA2|CLEC4M|CHMP4C|F11R|EIF2AK2|ITGA2|IFITM3|LDLR|GAS6|MID2|AXL|PPIA|TNIP1|ANPEP|CXCR4|THOC6|DAG1|IFITM1|CHMP4B|TRIM8|CR1|CLDN1|HIPK2|CTNNB1	34	0.00223481
renal tubule morphogenesis (GO:0061333)	biological_process	P1	WNT6|TCF21|COL4A1|FAT4|WT1|BMP2|LGR4|GATA3|MTSS1|BCL2|TACSTD2|CITED1|VEGFA|SOX9|MEF2C|HES1	16	0.00249006
ventricular septum development (GO:0003281)	biological_process	P1	SOX4|ROBO1|BMPR2|FZD2|GATA3|DAND5|ZFPM2|SMAD7|HES1|TGFBR2|SOX11|HEY2|GATA4|SMAD6|HEG1	15	0.00252169
branching morphogenesis of an epithelial tube (GO:0048754)	biological_process	P1	WNT6|TCF21|COL4A1|PPP1CA|GLI2|FAT4|YAP1|LRP5|WT1|BMP2|LGR4|EPHA2|BCL2|TACSTD2|CITED1|DDR1|VEGFA|SOX9|MMP14|TGFBR2|FGF10|NKX3-1|DAG1|CTNNB1|EXT1	25	0.00267949
cartilage development involved in endochondral bone morphogenesis (GO:0060351)	biological_process	P1	COL27A1|TSKU|COL1A1|SERPINH1|SOX9|TGFBR2|ANXA6|STC1|EXT1	9	0.00319551
regulation of pri-miRNA transcription by RNA polymerase II (GO:1902893)	biological_process	P1	ETS1|SMAD3|WT1|BMP2|GATA3|BMPR1A|SREBF2|SOX9|NFIB|TP53|FOXO3|SMAD6|JUN	13	0.00343649
viral genome replication (GO:0019079)	biological_process	P1	IFITM2|PPIB|ZC3HAV1|NFIA|CD28|RNASEL|PLSCR1|NUCKS1|OAS1|FAM111A|CLEC4M|IFI16|BCL2|EIF2AK2|IFITM3|OAS3|GAS6|PPIA|TNIP1|APOBEC3F|SHFL|IFITM1|ISG15	23	0.00352918
apoptotic mitochondrial changes (GO:0008637)	biological_process	P1	BMF|IFI6|SLC25A4|YWHAB|YWHAH|PPIF|ARRB2|HRK|PYCARD|ERBB4|HSPD1|BCL2|TMEM14A|IFIT2|ZNF205|TP53|JUN|MOAP1|BAX|CHCHD10|AIFM2	21	0.00404166
pri-miRNA transcription by RNA polymerase II (GO:0061614)	biological_process	P1	ETS1|SMAD3|WT1|BMP2|GATA3|BMPR1A|SREBF2|SOX9|NFIB|TP53|FOXO3|SMAD6|JUN	13	0.00407998
bone morphogenesis (GO:0060349)	biological_process	P1	BMPR2|TWIST1|COL27A1|TSKU|COL1A1|LRP5|SERPINH1|DHRS3|SOX9|MEF2C|MMP14|TGFBR2|ANXA6|CHSY1|LTBP3|FOXN3|STC1|EXT1	18	0.00437052
vascular endothelial growth factor signaling pathway (GO:0038084)	biological_process	P1	SEMA6A|CCBE1|DLL1|ROBO1|HSPB1|CD63|IL12B|FLT3|VEGFA|PRKD1|CADM4|JCAD	12	0.00462444
glutathione metabolic process (GO:0006749)	biological_process	P1	GGT1|CNDP2|GSTA1|GGT6|GGT7|GSTO1|NFE2L2|GLO1|ARL6IP5|GSTM4|GSTP1|GSTA4|GSTT2|HPGDS	14	0.00483955
response to estradiol (GO:0032355)	biological_process	P1	GGT1|COL1A1|ETS1|MMP15|CD38|NCOR2|POSTN|ITGA2|GGT7|RGS9|ESR2|APOB|FGF10|ASS1|OXTR|CRHBP|DNMT3A|WFDC1|GSTP1|PAM|NRIP1|CTNNB1	22	0.00486455
mesonephros development (GO:0001823)	biological_process	P1	WNT6|TCF21|FAT4|SMAD5|SMAD3|WT1|BMP2|LGR4|GATA3|SMAD7|BCL2|TACSTD2|CITED1|VEGFA|SOX9|HES1|FGF10|SMAD6	18	0.00494078
camera-type eye morphogenesis (GO:0048593)	biological_process	P1	EPHB2|NAGLU|DLL1|TWIST1|BCAR3|TSKU|LRP5|EPHA2|NOTCH2|OBSL1|ZHX2|VEGFA|SOX9|ALDH1A3|TBX2|SOX11|TENM3|JAG1|BAX|HIPK2|CDON	21	0.00495908
endothelial cell differentiation (GO:0045446)	biological_process	P1	MSN|DLL1|BMPR2|FOXJ2|RDX|PLOD3|S1PR3|PDPN|F11R|RAPGEF3|PDE4D|VEGFA|VCL|COL18A1|CXCR4|HEY2|JAG1|STC1|HEG1|COL15A1|CLDN1	21	0.00495908
endoderm development (GO:0007492)	biological_process	P1	MMP2|COL5A2|GATA6|SMAD3|ZFP36L1|ITGAV|ITGB5|MMP15|BMPR1A|COL5A1|MED12|COL4A2|MMP14|GATA4|LAMA3|EXT1	16	0.0051104
negative regulation of cellular component organization (GO:0051129)	biological_process	P1	SEMA6A|EPHB2|H1-0|APOC1|PMEPA1|GSN|H1-10|UBQLN2|SEMA4C|TWIST1|TET1|TSKU|YWHAH|PPIF|LGALS1|PFN1|ARRB2|YAP1|HNRNPA1|RDX|SEMA6B|LIMA1|APOA1|TWF2|ITGAV|NBDY|APC2|CD38|DPYSL3|ANTXR1|PRNP|ARHGAP24|APOE|PIK3R1|F11R|PPP3CA|NAV3|TACSTD2|FAM107A|CGNL1|CAMSAP3|MID1IP1|PLEKHH2|VAT1|RAPGEF3|FYN|CDK5|TMEM14A|ADCY6|LDLR|CORO2B|VEGFA|SVIL|PRKD1|SOX9|MMP14|NGEF|SNAPIN|MAG|EPHA7|SNCA|HUWE1|ITGA3|B2M|FHOD3|SEMA7A|E…	82	0.00596277
eye morphogenesis (GO:0048592)	biological_process	P1	EPHB2|NAGLU|COL5A2|DLL1|TWIST1|BCAR3|TSKU|LRP5|EPHA2|COL5A1|NOTCH2|BCL2|OBSL1|ZHX2|VEGFA|SOX9|ALDH1A3|TBX2|SOX11|TENM3|JAG1|BAX|HIPK2|CDON	24	0.00596327
homotypic cell-cell adhesion (GO:0034109)	biological_process	P1	HSPB1|ACTB|MYL12A|TLN1|LGALS1|PRKCA|RDX|GP1BA|PDPN|F11R|CD9|VCL|PPIA|DSP|MYH9|SYK|C1QTNF1	17	0.00609138
female sex differentiation (GO:0046660)	biological_process	P1	AMHR2|AMH|ARRB2|PCYT1B|ARID5B|WT1|INHA|ZFPM2|BCL2|ANG|VEGFA|LHX9|MMP14|NR5A1|AXL|FGF10|CTNNA1|NRIP1|INHBB|BAX	20	0.00618866
female gonad development (GO:0008585)	biological_process	P1	AMHR2|AMH|ARRB2|PCYT1B|ARID5B|WT1|INHA|ZFPM2|BCL2|ANG|VEGFA|LHX9|MMP14|NR5A1|CTNNA1|NRIP1|INHBB|BAX	18	0.0061925
type I interferon signaling pathway (GO:0060337)	biological_process	P1	IFITM2|IRF2|IFI6|IFI35|RNASEL|NLRC5|OAS1|USP18|IFIT3|IFNAR1|IFITM3|OAS3|GBP2|IFIT2|IFNAR2|IFITM1|ISG15|TYK2	18	0.0061925
platelet aggregation (GO:0070527)	biological_process	P1	HSPB1|ACTB|MYL12A|TLN1|PRKCA|GP1BA|PDPN|F11R|CD9|VCL|PPIA|MYH9|SYK|C1QTNF1	14	0.00645947
positive regulation of osteoblast differentiation (GO:0045669)	biological_process	P1	WWTR1|BMPR2|YAP1|SMAD5|LRP5|BMP2|BMPR1A|PRKD1|MEF2C|IL6R|SOX11|DDR2|JAG1|IFITM1	14	0.00645947
ureteric bud development (GO:0001657)	biological_process	P1	WNT6|TCF21|FAT4|SMAD5|SMAD3|WT1|BMP2|LGR4|GATA3|SMAD7|BCL2|TACSTD2|CITED1|VEGFA|SOX9|HES1|SMAD6	17	0.00686336
cellular response to type I interferon (GO:0071357)	biological_process	P1	IFITM2|IRF2|IFI6|IFI35|RNASEL|NLRC5|OAS1|USP18|IFIT3|IFNAR1|IFITM3|OAS3|GBP2|IFIT2|IFNAR2|IFITM1|ISG15|TYK2	18	0.00697418
regulation of biological process involved in symbiotic interaction (GO:0043903)	biological_process	P1	IFITM2|TRIM21|GSN|ZC3HAV1|LY6E|LGALS1|CD28|RNASEL|PLSCR1|OAS1|ITGAV|FAM111A|CHMP4C|IFI16|BCL2|EIF2AK2|IFITM3|OAS3|MID2|AXL|PPIA|TNIP1|CXCR4|MDFIC|APOBEC3F|SHFL|IFITM1|CHMP4B|TRIM8|ISG15	30	0.00699578
regulation of ossification (GO:0030278)	biological_process	P1	CCR1|BMPR2|TWIST1|SMAD3|BMP2|ANO6|BMPR1A|DHRS3|SMAD7|BCL2|SOX9|MEF2C|ANKH|SOX11|DDR2|CHSY1|LTBP3|SMAD6|P2RX7|ISG15	20	0.00763614
mesonephric epithelium development (GO:0072163)	biological_process	P1	WNT6|TCF21|FAT4|SMAD5|SMAD3|WT1|BMP2|LGR4|GATA3|SMAD7|BCL2|TACSTD2|CITED1|VEGFA|SOX9|HES1|SMAD6	17	0.00767605
mesonephric tubule development (GO:0072164)	biological_process	P1	WNT6|TCF21|FAT4|SMAD5|SMAD3|WT1|BMP2|LGR4|GATA3|SMAD7|BCL2|TACSTD2|CITED1|VEGFA|SOX9|HES1|SMAD6	17	0.00767605
astrocyte differentiation (GO:0048708)	biological_process	P1	DLL1|BMP2|CDK6|C1QA|PRPF19|BACE2|LDLR|GRN|SOX9|HES1|MAG|LAMB2|LRP1|TLR4|VIM	15	0.00804943
tissue regeneration (GO:0042246)	biological_process	P1	GSN|NINJ2|CDKN1B|YAP1|NINJ1|ERBB4|POSTN|PPP3CA|CD9|CPQ|TGFBR2|PTGFRN|FGF10|GATA4|DAG1	15	0.00804943
gland morphogenesis (GO:0022612)	biological_process	P1	CAPN1|MSN|GLI2|LRP5|CSF1R|LIMS2|EPHA2|NOTCH2|BCL2|PLXNA1|DDR1|SOX9|TBX2|TGFBR2|PDGFA|FGF10|NKX3-1|NTN4|DAG1|BAX	20	0.00836008
development of primary female sexual characteristics (GO:0046545)	biological_process	P1	AMHR2|AMH|ARRB2|PCYT1B|ARID5B|WT1|INHA|ZFPM2|BCL2|ANG|VEGFA|LHX9|MMP14|NR5A1|CTNNA1|NRIP1|INHBB|BAX	18	0.008669
ureteric bud morphogenesis (GO:0060675)	biological_process	P1	WNT6|TCF21|FAT4|WT1|BMP2|LGR4|GATA3|BCL2|TACSTD2|CITED1|VEGFA|SOX9|HES1	13	0.00895203
artery morphogenesis (GO:0048844)	biological_process	P1	SOX4|BMPR2|ADAMTS9|BMPR1A|APOE|ZMIZ1|SMAD7|VEGFA|HES1|TBX2|APOB|HEY2|JAG1|LRP1	14	0.00980556
endothelial cell development (GO:0001885)	biological_process	P1	MSN|RDX|PLOD3|S1PR3|F11R|RAPGEF3|PDE4D|VEGFA|VCL|COL18A1|STC1|HEG1|COL15A1|CLDN1	14	0.00980556
axon extension (GO:0048675)	biological_process	P1	NDN|SEMA6A|DPYSL2|BMPR2|SEMA4C|DCLK1|SEMA6B|NRCAM|TWF2|APOE|CDK5|VEGFA|VCL|MAG|LAMB2|SEMA7A|CXCL12|OLFM1|SEMA4B|LRP1	20	0.0100963
mesonephric tubule morphogenesis (GO:0072171)	biological_process	P1	WNT6|TCF21|FAT4|WT1|BMP2|LGR4|GATA3|BCL2|TACSTD2|CITED1|VEGFA|SOX9|HES1	13	0.0103031
endochondral bone morphogenesis (GO:0060350)	biological_process	P1	BMPR2|COL27A1|TSKU|COL1A1|SERPINH1|SOX9|MEF2C|MMP14|TGFBR2|ANXA6|STC1|EXT1	12	0.0105701
metanephros development (GO:0001656)	biological_process	P1	WWTR1|TCF21|FAT4|YAP1|WT1|LGR4|GATA3|BCL2|CITED1|ID3|SOX9|HES1|PDGFA|FGF10|LAMB2|NKX3-1	16	0.0105791
digestive tract development (GO:0048565)	biological_process	P1	TCF21|GLI2|FAT4|SLC4A2|GATA6|YAP1|SMAD3|LGR4|EDNRB|BCL2|SOX10|HES1|TBX2|TGFBR2|SOX11|FGF10|ASS1|OXTR|GATA4|EPHB3|EXT1	21	0.0105854
digestive system development (GO:0055123)	biological_process	P1	TCF21|GLI2|FAT4|SLC4A2|GATA6|YAP1|SMAD3|LGR4|EDNRB|BCL2|SOX10|HES1|TBX2|TGFBR2|SOX11|FGF10|ASS1|OXTR|GATA4|EPHB3|IGF2|EXT1	22	0.0109474
endothelium development (GO:0003158)	biological_process	P1	MSN|DLL1|BMPR2|FOXJ2|RDX|PLOD3|S1PR3|PDPN|F11R|RAPGEF3|PDE4D|VEGFA|VCL|COL18A1|CXCR4|HEY2|JAG1|STC1|HEG1|COL15A1|CLDN1|CTNNB1	22	0.0109474
regulation of fat cell differentiation (GO:0045598)	biological_process	P1	WWTR1|CCDC3|TRIB2|TRIB3|SOX13|YAP1|LRP5|ZFP36L2|SMAD3|ZFP36L1|BMP2|WIF1|GATA3|CCDC85B|TRIO|ZFPM2|RUNX1T1|FTO|GDF3|HES1|ZBTB7C|JAG1	22	0.0109474
artery development (GO:0060840)	biological_process	P1	SOX4|ROBO1|BMPR2|ADAMTS9|BMPR1A|APOE|ZMIZ1|SMAD7|VEGFA|HES1|TBX2|APOB|HEY2|NKX3-1|JAG1|SMAD6|LRP1	17	0.0118734
regulation of cytoskeleton organization (GO:0051493)	biological_process	P1	RGS4|RHOC|GSN|RPS3|PFN1|RDX|LIMA1|CSF1R|SMAD3|APOA1|LIMCH1|TWF2|CDC42EP4|APC2|PYCARD|STMN3|RAC2|MAPRE2|CHMP4C|ARHGEF10L|PIK3R1|NOTCH2|F11R|NAV3|TACSTD2|FAM107A|CGNL1|CAMSAP3|NES|MID1IP1|PLEKHH2|RAPGEF3|CDK5|CORO2B|FSCN1|SVIL|RHOG|PDXP|PDGFA|SNCA|CDK2AP2|FHOD3|SYDE1|CD47|RHOBTB3|S100A10|CLIP3|NCK2|CXCL12|BICD1|PAM|P2RX7|PREX1|CHMP4B|LRP1|RHOBTB2|GMFB|IQGAP1|SYNPO|RAC1	60	0.0122969
Rho protein signal transduction (GO:0007266)	biological_process	P1	ROBO1|ARHGEF3|ABCA1|COL3A1|APOA1|OPHN1|CDC42EP4|ARHGAP1|APOE|PDPN|F11R|CTNNAL1|RHOG|RTKN|F2R|ITGA3|ARHGAP42|HEG1|COL1A2|LPAR4|ADGRG1|RAC1	22	0.0130861
positive regulation of mitochondrion organization (GO:0010822)	biological_process	P1	BMF|YWHAB|YWHAH|PPIF|CAMKK2|VDAC1|HRK|MGARP|PYCARD|BCL2|MIEF2|ZNF205|TP53|MOAP1|BAX|CHCHD10	16	0.0132824
renal system process (GO:0003014)	biological_process	P1	GSN|MAGED2|KCNQ1|EMP2|NPR1|AQP3|PRKAR2B|EDNRB|BCL2|PKN1|ADORA1|ADCY6|HSD11B2|CORO2B|GAS6|F2R|AQP4|ITGA3|STC1|PRKAR1B	20	0.0132933
regulation of biomineral tissue development (GO:0070167)	biological_process	P1	WNT6|CCR1|BMPR2|TWIST1|SMAD3|BMP2|ANO6|BMPR1A|SOX9|MEF2C|GAS6|ANKH|DDR2|HEY2|LTBP3|P2RX7|ISG15	17	0.0147663
sex differentiation (GO:0007548)	biological_process	P1	PATZ1|AMHR2|TCF21|AMH|ARRB2|GATA6|PCYT1B|SMAD5|HSD17B3|ARID5B|WT1|CNTFR|LGR4|GATA3|BMPR1A|INHA|SRY|ZFPM2|BCL2|ANG|VEGFA|LHX9|SOX9|MMP14|NR5A1|AXL|FGF10|NKX3-1|GATA4|RHOBTB3|CTNNA1|NRIP1|INHBB|BAX|ADGRG1	35	0.0162304
cellular response to vascular endothelial growth factor stimulus (GO:0035924)	biological_process	P1	SEMA6A|CCBE1|DLL1|ROBO1|HSPB1|CD63|IL12B|FLT3|VEGFA|PRKD1|CADM4|GAS1|ATP2B4|JCAD	14	0.0164502
vascular endothelial growth factor receptor signaling pathway (GO:0048010)	biological_process	P1	HSPB1|NIBAN2|ITGAV|DOCK1|PIK3R1|FYN|VAV2|VEGFA|PRKD1|AXL|CADM4|MAPKAPK3|FGF10|EMILIN1|NCK2|CYBB|RAC1	17	0.0165043
focal adhesion assembly (GO:0048041)	biological_process	P1	AJUBA|SMAD3|LIMCH1|BCL2|FAM107A|CAMSAP3|ITGA2|CORO2B|VEGFA|VCL|MMP14|SLK|S100A10|LRP1|IQGAP1|RAC1	16	0.0167428
vasculogenesis (GO:0001570)	biological_process	P1	YAP1|EMP2|ZFP36L1|ITGAV|WT1|TNNI3|EPHA2|ZMIZ1|ZFPM2|CITED1|RIN2|VEGFA|TGFBR2|HEY2|HEG1	15	0.0167428
skeletal muscle organ development (GO:0060538)	biological_process	P1	TCF21|DLL1|NIBAN2|TWIST1|MYL6|WT1|CNTFR|MSC|BCL2|PPP3CA|BCL9L|GPC1|CDK5|SVIL|MEF2C|TAFAZZIN|ATF3|SOX11|ASS1|NLN|DAG1|IGF2|MYLK2|CDON	24	0.0172434
regulation of biomineralization (GO:0110149)	biological_process	P1	WNT6|CCR1|BMPR2|TWIST1|SMAD3|BMP2|ANO6|BMPR1A|SOX9|MEF2C|GAS6|ANKH|DDR2|HEY2|LTBP3|P2RX7|ISG15	17	0.018193
kidney morphogenesis (GO:0060993)	biological_process	P1	WNT6|SOX4|WWTR1|TCF21|FAT4|WT1|BMP2|LGR4|GATA3|BCL2|TACSTD2|CITED1|VEGFA|SOX9|HES1|FGF10	16	0.01862
positive regulation of cellular component biogenesis (GO:0044089)	biological_process	P1	BMF|EPHB2|RHOC|MSN|GSN|PLEK2|RPS3|HAS3|AJUBA|PFN1|ABCA1|PRKCA|SMAD3|APOA1|LIMCH1|TWF2|CDC42EP4|HRK|NLGN2|EPHA2|DPYSL3|PYCARD|RAC2|ARHGEF10L|PIK3R1|NAV3|SLITRK6|RAPGEF3|PLCE1|VEGFA|FSCN1|FERMT1|RALB|SOX9|PALM|PTPRD|SNCA|AMIGO2|OXTR|CD47|EMILIN1|EPHB3|S100A10|SYK|TP53|DAG1|NCK2|CROCC|P2RX7|CLSTN3|BAX|GMFB|GNL3L|IQGAP1|TLR4|CLDN1|FAM98A|CLSTN1|SYNPO|RAC1|ZMYND8	61	0.0188248
regulation of neuron apoptotic process (GO:0043523)	biological_process	P1	PTPRZ1|NONO|ARRB2|CNTFR|GATA3|ERBB3|PRNP|APOE|TOX3|BCL2|CITED1|NES|FYN|CDK5|GRN|MEF2C|AXL|MAG|EPHA7|F2R|EGLN3|TP53|FOXO3|JUN|BAX|LRP1|HIPK2|CTNNB1	28	0.018917
cholesterol metabolic process (GO:0008203)	biological_process	P1	SCD|APOL2|TSKU|ABCA1|LRP5|LIMA1|APOA1|TM7SF2|APOE|ABCG1|SREBF2|LDLR|CEL|MBTPS2|CYP27A1|CYP11A1|MBTPS1|HSD17B7|SCAP|APOB|CYB5R3|FDXR|VLDLR	23	0.0200539
regulation of epithelial cell differentiation (GO:0030856)	biological_process	P1	WWTR1|DLL1|FOXJ2|FAT4|NKX6-3|YAP1|ZFP36L1|AQP3|KLF7|GATA3|S1PR3|F11R|CITED1|VEGFA|VCL|SOX9|GDF3|HES1|PTCH2|HEY2|JAG1|TRIM16|CTNNB1	23	0.0200539
negative regulation of protein binding (GO:0032091)	biological_process	P1	WFIKKN2|PPP1CA|ACTB|ARRB2|DAB2|NES|RALB|B2M|CSNK1E|CFHR1|NKX3-1|IFIT2|ATP2A3|PTPRF|TLE5|BAX|GNL3L	17	0.0200666
astrocyte development (GO:0014002)	biological_process	P1	DLL1|CDK6|C1QA|BACE2|LDLR|GRN|LAMB2|LRP1|TLR4|VIM	10	0.0200666
female pregnancy (GO:0007565)	biological_process	P1	STOX2|MMP2|BMPR2|MAGED2|APOL2|RPL29|TRO|SLC38A2|ACSL4|ETS1|EMP2|TCF23|CD38|BCL2|DDR1|ITGA2|HSD11B2|VEGFA|TGFBR2|ITGA3|UPRT|SYDE1|OXTR|CRHBP|STC1|PAM	26	0.0210857
male gonad development (GO:0008584)	biological_process	P1	PATZ1|AMHR2|TCF21|GATA6|ARID5B|WT1|GATA3|INHA|SRY|ZFPM2|BCL2|LHX9|SOX9|MMP14|NR5A1|NKX3-1|GATA4|RHOBTB3|CTNNA1|BAX|ADGRG1	21	0.0231406
dendritic spine organization (GO:0097061)	biological_process	P1	EPHB2|IGF1R|INSR|PRNP|APOE|TANC1|FYN|CDK5|NGEF|ZDHHC15|CAMK2B|ITGA3|TANC2|EPHB3|ZMYND8	15	0.0232808
regulation of epithelial to mesenchymal transition (GO:0010717)	biological_process	P1	WWTR1|TWIST1|COL1A1|DAB2|SMAD3|GLIPR2|BMP2|GATA3|LOXL2|PDPN|SMAD7|BCL9L|TGFBR2|JAG1|DAG1|OLFM1|CTNNB1	17	0.0244421
regulation of response to wounding (GO:1903034)	biological_process	P1	EPHB2|SMAD3|STK24|ANO6|TNFRSF12A|GP1BA|APOE|CD9|GRN|FERMT1|PRDX2|CADM4|PDGFA|F2R|NFE2L2|CXCR4|PROS1|WFDC1|PTPRF|CASK|LRP1|ST3GAL4|CLDN1|C1QTNF1	24	0.0250234
development of primary male sexual characteristics (GO:0046546)	biological_process	P1	PATZ1|AMHR2|TCF21|GATA6|ARID5B|WT1|GATA3|INHA|SRY|ZFPM2|BCL2|LHX9|SOX9|MMP14|NR5A1|NKX3-1|GATA4|RHOBTB3|CTNNA1|BAX|ADGRG1	21	0.0251821
negative regulation of cell development (GO:0010721)	biological_process	P1	SEMA6A|EPHB2|SEMA4C|YWHAH|SEMA6B|BMPR1A|S1PR3|POSTN|EDNRB|PPP3CA|TACSTD2|CDK5|SOX10|LDLR|VEGFA|HES1|MAG|EPHA7|SOX11|B2M|SEMA7A|ACTN4|TP53|CTNNA1|SEMA4B	25	0.0283535
nephron tubule morphogenesis (GO:0072078)	biological_process	P1	WNT6|TCF21|FAT4|WT1|BMP2|LGR4|GATA3|BCL2|TACSTD2|CITED1|VEGFA|SOX9|HES1	13	0.029086
regulation of transforming growth factor beta receptor signaling pathway (GO:0017015)	biological_process	P1	HTRA3|WFIKKN2|PMEPA1|DAB2|CHST11|SMAD3|DAND5|SMAD7|CITED1|BCL9L|GIPC1|FERMT1|NREP|TGFBR2|ITGA3|SOX11|EMILIN1|TP53|SMAD6|HIPK2	20	0.029086
peripheral nervous system development (GO:0007422)	biological_process	P1	LAMA2|ERBB3|EDNRB|MED12|ERBB2|NEFH|GPC1|CDK5|SOX10|LAMB2|DAG1|NCMAP|ADGRB2|CLDN1	14	0.029086
regulation of bone mineralization (GO:0030500)	biological_process	P1	CCR1|BMPR2|TWIST1|SMAD3|BMP2|ANO6|BMPR1A|SOX9|MEF2C|ANKH|DDR2|LTBP3|P2RX7|ISG15	14	0.029086
regulation of protein localization to plasma membrane (GO:1903076)	biological_process	P1	EPHB2|CNPY4|ACTB|DAB2|EPHA2|ARHGEF16|NHLRC1|PIK3R1|CDK5|RHOG|MMP14|ITGA3|APPL1|CLIP3|LRP1|TMBIM1|ATP2B4	17	0.0293023
response to mechanical stimulus (GO:0009612)	biological_process	P1	PHF24|GSN|COL1A1|SLC38A2|ETS1|COL3A1|POSTN|TMEM150C|F11R|SLITRK6|ITGA2|FYN|SOX9|MMP14|MAG|TGFBR2|CHI3L1|CXCR4|GATA4|CASP1|DMD|DAG1|CXCL12|JUN|TLR4|CTNNB1|NFKBIA|RAC1	28	0.0294597
regulation of transmembrane transport (GO:0034762)	biological_process	P1	CAPN1|EPHB2|KCNJ5|RGS4|IRS1|SCN9A|CD63|OPN3|TWIST1|ACTB|LRRC38|ATP1B1|YWHAH|KCNQ1|TRIB3|PPIF|INSR|RNASEL|GNB5|GLRX|KCNF1|VDAC1|NLGN2|KCNC4|ANO6|TSPAN13|PRNP|PLA2G1B|JPH4|PIK3R1|BCL2|TMEM38A|TMEM109|FXYD6|STIM2|FYN|CDK5|PDE4D|KCNK15|MEF2C|GRIA3|RGS9|GSTO1|SCN7A|F2R|SNCA|NFE2L2|APPL1|CRHBP|ARL6IP5|ACTN4|CLIP3|DMD|TCAF1|HRC|KLHL24|P2RX7|RRAD|BAX|CYBB|SNTA1|ATP2B4|KCNIP3	63	0.0298839
axon regeneration (GO:0031103)	biological_process	P1	APOA1|STK24|BCL2|GRN|NREP|MAG|LAMB2|CTNNA1|DAG1|PTPRF|LRP1	11	0.030482
branching involved in ureteric bud morphogenesis (GO:0001658)	biological_process	P1	WNT6|TCF21|FAT4|WT1|BMP2|LGR4|BCL2|TACSTD2|CITED1|VEGFA|SOX9	11	0.030482
regulation of axon extension (GO:0030516)	biological_process	P1	SEMA6A|DPYSL2|BMPR2|SEMA4C|SEMA6B|NRCAM|TWF2|APOE|CDK5|VEGFA|MAG|SEMA7A|CXCL12|OLFM1|SEMA4B|LRP1	16	0.030677
regulation of DNA binding (GO:0051101)	biological_process	P1	WFIKKN2|H1-0|TFAP4|NIBAN2|TWIST1|ENHO|GATA3|IFI16|ITGA2|HES1|SOX11|HEY2|ZBTB7C|BCL3|JUN|MDFI|HIPK2|CTNNB1|NFKBIA	19	0.0311534
regulation of Rho protein signal transduction (GO:0035023)	biological_process	P1	ROBO1|ARHGEF3|ABCA1|COL3A1|APOA1|OPHN1|APOE|F11R|F2R|ITGA3|ARHGAP42|HEG1|LPAR4|ADGRG1|RAC1	15	0.0317308
collagen metabolic process (GO:0032963)	biological_process	P1	MMP23B|MMP2|COL1A1|ARRB2|SERPINH1|PLOD3|P3H2|LARP6|MMP15|COL5A1|ITGA2|MMP14|F2R|EMILIN1|COL1A2|COL15A1|VIM	17	0.0321166
regulation of actin filament bundle assembly (GO:0032231)	biological_process	P1	RHOC|PFN1|RDX|SMAD3|APOA1|LIMCH1|ARHGEF10L|PIK3R1|F11R|TACSTD2|CGNL1|RAPGEF3|CORO2B|CD47|S100A10|SYNPO|RAC1	17	0.0321166
response to axon injury (GO:0048678)	biological_process	P1	LGALS1|APOA1|STK24|DPYSL3|BCL2|GRN|NREP|MAG|LAMB2|CTNNA1|DAG1|PTPRF|BAX|LRP1	14	0.0324335
cellular response to tumor necrosis factor (GO:0071356)	biological_process	P1	CASP4|CCDC3|GSDME|RPS3|COL1A1|ZFP36L2|APOA1|ZFP36L1|TDGF1|TXNDC17|GATA3|TNFSF13B|ADAMTS7|TNFRSF12A|PYCARD|POSTN|GAS6|CHI3L1|NFE2L2|APOB|GBP2|NKX3-1|ASS1|CASP1|CRHBP|ACTN4|CLIP3|PSME1|SYK|TP53|FOXO3|KRT8|GSTP1|COMMD7|CLDN1|NFKBIA	36	0.0327047
regulation of wound healing (GO:0061041)	biological_process	P1	EPHB2|SMAD3|ANO6|TNFRSF12A|GP1BA|APOE|CD9|FERMT1|PRDX2|CADM4|PDGFA|F2R|NFE2L2|CXCR4|PROS1|WFDC1|CASK|ST3GAL4|CLDN1|C1QTNF1	20	0.0341457
secondary alcohol metabolic process (GO:1902652)	biological_process	P1	SCD|APOL2|TSKU|ABCA1|LRP5|LIMA1|APOA1|TM7SF2|APOE|ABCG1|SREBF2|LDLR|CEL|MBTPS2|CYP27A1|CYP11A1|MBTPS1|HSD17B7|SCAP|APOB|CYB5R3|FDXR|VLDLR	23	0.0356098
interleukin-10 production (GO:0032613)	biological_process	P1	DLL1|TRIB2|IL12B|CD28|PYCARD|HSPD1|CD47|BCL3|SYK|JAK3|TLR4|ISG15	12	0.0359229
nephron epithelium morphogenesis (GO:0072088)	biological_process	P1	WNT6|TCF21|FAT4|WT1|BMP2|LGR4|GATA3|BCL2|TACSTD2|CITED1|VEGFA|SOX9|HES1	13	0.0362286
regulation of cellular response to transforming growth factor beta stimulus (GO:1903844)	biological_process	P1	HTRA3|WFIKKN2|PMEPA1|DAB2|CHST11|SMAD3|DAND5|SMAD7|CITED1|BCL9L|GIPC1|FERMT1|NREP|TGFBR2|ITGA3|SOX11|EMILIN1|TP53|SMAD6|HIPK2	20	0.0364001
bone mineralization (GO:0030282)	biological_process	P1	CCR1|BMPR2|FGR|TWIST1|SMAD3|BMP2|LGR4|ANO6|BMPR1A|SOX9|MEF2C|ANKH|DDR2|TUFT1|LTBP3|COL1A2|P2RX7|ISG15	18	0.0387191
erythrocyte homeostasis (GO:0034101)	biological_process	P1	ETS1|SMAD5|ZFP36L1|CDK6|GATA3|INHA|DNASE2|EPAS1|KLF13|RPS14|VEGFA|PTBP3|RPS24|AXL|B2M|FOXO3|JAK3|ISG15|HIPK2	19	0.0390063
carbohydrate derivative biosynthetic process (GO:1901137)	biological_process	P1	ATP5MC2|ST6GALNAC1|B4GAT1|PAPSS1|CHPF|EXTL2|GALNT18|GALNT16|SCD|IMPDH2|BMPR2|UCK2|TET1|HAS3|C1GALT1C1|NDST4|CHST14|ST8SIA5|ACSL4|ST3GAL2|CHST11|ST6GALNAC4|PLOD3|NPR1|POGLUT3|B3GALT6|CHST3|GALNT1|HS2ST1|H19|ATP5F1C|SLC35B2|BCL2|B3GNT3|BACE2|GPC1|AMPD3|MGAT5|HS6ST1|PDHA1|ADCY6|GAL3ST4|DCTD|VCAN|ENO1|GALNT17|FUT9|TNIP1|APRT|GLCE|PRTFDC1|UGDH|ST3GAL6|ALDOA|CHSY1|GBGT1|UPRT|GNE|POGLUT2|B3GNT7|ITM2C|CH…	72	0.0398237
regulation of extent of cell growth (GO:0061387)	biological_process	P1	SEMA6A|DPYSL2|BMPR2|SEMA4C|SEMA6B|NRCAM|TWF2|APOE|CDK5|VEGFA|MAG|EPHA7|SEMA7A|CXCL12|OLFM1|SEMA4B|LRP1	17	0.0413172
negative chemotaxis (GO:0050919)	biological_process	P1	SEMA6A|ROBO1|SEMA4C|SEMA6B|APOA1|ITGAV|PDGFA|EPHA7|SEMA7A|SEMA4B	10	0.0419675
endocrine system development (GO:0035270)	biological_process	P1	CDH1|SOX4|DLL1|GLI2|GATA6|ETS1|SMAD3|ARID5B|APOA1|WT1|BMP2|CDK6|GATA3|BMPR1A|SOX9|HES1|NR5A1|IL6R|FGF10	19	0.0421588
positive regulation of cell junction assembly (GO:1901890)	biological_process	P1	EPHB2|SMAD3|NLGN2|EPHA2|SLITRK6|VEGFA|PTPRD|AMIGO2|OXTR|EPHB3|S100A10|CLSTN3|IQGAP1|CLDN1|CLSTN1|RAC1	16	0.0434475
BMP signaling pathway (GO:0030509)	biological_process	P1	HTRA3|AMHR2|BMPR2|AMH|SMAD5|SMAD3|PCSK6|BMP2|USP9Y|BMPR1A|DAND5|NOTCH2|SMAD7|CRIM1|GDF3|HES1|ITGA3|SOX11|GATA4|SMAD6|HIPK2|EXT1	22	0.0438565
nephron morphogenesis (GO:0072028)	biological_process	P1	WNT6|TCF21|FAT4|WT1|BMP2|LGR4|GATA3|BCL2|TACSTD2|CITED1|VEGFA|SOX9|HES1	13	0.0441172
regulation of coagulation (GO:0050818)	biological_process	P1	EPHB2|ANO6|GP1BA|APOE|PROCR|CD9|PRDX2|PDGFA|F2R|NFE2L2|PROS1|ST3GAL4|C1QTNF1	13	0.0441172
protein O-linked glycosylation (GO:0006493)	biological_process	P1	B4GAT1|GALNT18|GALNT16|TET1|C1GALT1C1|ST3GAL2|ST6GALNAC4|PLOD3|POGLUT3|GALNT1|B3GNT3|POGLUT2|B3GNT7|B3GNT2|XXYLT1|ST3GAL4|TRAK1	17	0.0443171
positive regulation of binding (GO:0051099)	biological_process	P1	PLCL2|H1-0|TRIM21|NIBAN2|TWIST1|PYGO2|TRIB3|TICAM1|LARP6|BMP2|GATA3|RPL11|ZNF618|APOE|ITGA2|CDK5|RALB|HES1|B2M|DTX3L|S100A10|LRP1|HIPK2|CTNNB1	24	0.0443826
protein autophosphorylation (GO:0046777)	biological_process	P1	MVP|INSRR|IGF1R|FGR|INSR|SIK1|CAMKK2|CSF1R|STK24|ERBB4|GRK5|MAP3K21|ERBB2|EIF2AK2|STK10|DDR1|CDK5|FLT3|TAOK3|VEGFA|PRKD1|PDGFA|CAMK2B|EPHA7|MAPKAPK3|SLK|DDR2|EPHB3|MYLK2|IQGAP1	30	0.0445564
regulation of stress fiber assembly (GO:0051492)	biological_process	P1	RHOC|PFN1|SMAD3|APOA1|LIMCH1|ARHGEF10L|PIK3R1|F11R|TACSTD2|CGNL1|RAPGEF3|CORO2B|CD47|S100A10|RAC1	15	0.045571
carbohydrate metabolic process (GO:0005975)	biological_process	P1	ST6GALNAC1|IRS1|PGAM1|IGFBP4|PPP1CA|HAS3|NDST4|ADRB3|INSR|CHST14|PGLS|SIK1|ST8SIA5|FBP1|ST3GAL2|LRP5|CHST11|ST6GALNAC4|OAS1|NCOA2|CHST3|SLC25A11|PPP1R1A|HS2ST1|SYNJ2|ALDH1B1|BCKDK|NHLRC1|SHPK|B3GNT3|EDEM2|PDHA1|GAL3ST4|PDXP|FAM3A|ENO1|HEXD|FUT9|ATF3|GSTO1|CHI3L1|SNCA|UGDH|ST3GAL6|ALDOA|ALDH1A1|GBGT1|GLO1|NLN|CYB5R3|GNE|PGM5|TP53|SLC2A3|B3GNT7|IGF2|SLC39A14|FAM3C|CHST9|P2RX7|CPT1A|B3GNT2|ST3GAL4|P…	67	0.0459026
positive regulation of protein kinase B signaling (GO:0051897)	biological_process	P1	IRS1|IGF1R|INSR|ARRB2|CD28|HIP1|GATA3|ERBB3|ERBB4|RAC2|H19|PIK3R1|ERBB2|FYN|FAM110C|RHOG|GAS6|AXL|PDGFA|CHI3L1|FGF10|IGF2|C1QTNF1|RAC1	24	0.0476663
B cell activation involved in immune response (GO:0002312)	biological_process	P1	PLCL2|DLL1|LGALS1|CD28|HSPD1|NOTCH2|MSH6|LFNG|NDFIP1|SHLD1|BCL3|CR1|EXOSC6|TLR4	14	0.0477572
extracellular matrix disassembly (GO:0022617)	biological_process	P1	CAPN1|MMP2|ADAMTS5|ETS1|ELANE|MMP15|CTRB1|PDPN|DDR1|FSCN1|MMP14|TLL1|DDR2|LRP1	14	0.0477572
ERBB signaling pathway (GO:0038127)	biological_process	P1	IFI6|MVP|BCAR3|MVB12A|PRKCA|RHBDF1|HIP1|GRB7|SH3KBP1|ERBB3|ERBB4|PIK3R1|CPNE3|ERBB2|PLCE1|ADORA1|SOX9|AFAP1L2|NCK2|IQGAP1|REPS2	21	0.047852
cellular response to organic substance (GO:0071310)	biological_process	P1	NDN|SEMA6A|CDH1|WNT6|OSBPL7|SIRPA|HTRA3|CASP4|CCR1|WFIKKN2|GNG2|IFITM2|SOX4|RGS4|TRIM21|PTPN14|AMHR2|MMP2|IRF2|IFI6|FGFBP3|TCF21|CCBE1|PMEPA1|CREB3L4|MSN|CCDC3|GSN|GSDME|EXTL2|COL5A2|COL4A1|PTPN5|IRS1|GNRHR|TFAP4|DLL1|INSRR|ROBO1|HSPB1|BMPR2|IGF1R|NIBAN2|CD63|GLI2|PTPRZ1|TWIST1|RPS3|ACTB|BCAR3|COL1A1|FAT4|YWHAH|KCNQ1|IFI35|IL12B|TRIB3|INSR|TLN1|LGALS1|AMH|DSTYK|ARRB2|RAB20|DTX1|ENHO|KLF3|GATA6|ZY…	307	2.22347e-12
cellular response to chemical stimulus (GO:0070887)	biological_process	P1	NDN|SEMA6A|CDH1|WNT6|DDAH1|GGT1|OSBPL7|SIRPA|HTRA3|CASP4|CCR1|WFIKKN2|GNG2|IFITM2|KLRK1|SOX4|RGS4|TRIM21|PTPN14|AMHR2|MMP2|IRF2|IFI6|FGFBP3|TCF21|CCBE1|PMEPA1|CREB3L4|MSN|CCDC3|GSN|GSDME|PPIB|EXTL2|COL5A2|COL4A1|PTPN5|IRS1|GNRHR|TFAP4|CYP2A6|DLL1|PLA2G7|INSRR|ROBO1|CDKN1B|HSPB1|BMPR2|IGF1R|NIBAN2|CD63|GLI2|CHD6|PTPRZ1|TWIST1|RPS3|ACTB|BCAR3|COL1A1|NONO|FAT4|YWHAH|KCNQ1|AJUBA|IFI35|IL12B|TRIB3|PPI…	367	1.46806e-13
response to organic substance (GO:0010033)	biological_process	P1	NDN|SEMA6A|ILDR2|CDH1|WNT6|GGT1|OSBPL7|SIRPA|HTRA3|CASP4|CCR1|WFIKKN2|GNG2|ZBED3|IFITM2|SOX4|RGS4|ZFHX3|TRIM21|PTPN14|AMHR2|MMP2|IRF2|IFI6|FGFBP3|TCF21|CCBE1|PMEPA1|CREB3L4|MSN|CCDC3|GSN|GSDME|EXTL2|COL5A2|COL4A1|PTPN5|IRS1|GNRHR|TFAP4|UBQLN2|DLL1|INSRR|ROBO1|SCD|HSPB1|BMPR2|IGF1R|NIBAN2|CD63|GLI2|PTPRZ1|TWIST1|TRPC3|RPS3|ACTB|BCAR3|COL1A1|FAT4|YWHAH|KCNQ1|IFI35|IL12B|TRIB3|INSR|TLN1|LGALS1|AMH|A…	365	1.88571e-13
negative regulation of cellular process (GO:0048523)	biological_process	P1	NDN|SEMA6A|CDH1|BMF|CCDC22|ZNF219|VGLL4|EPHB2|DDAH1|PATZ1|PKIA|SIRPA|HTRA3|WFIKKN2|PLCL2|MTMR8|ZBED3|H1-0|KLRK1|SOX4|PHF6|WWTR1|APOC1|RGS4|ZFHX3|TRIM21|PTPN14|IRF2|RPS3A|IFI6|TCF21|PMEPA1|MOV10|TNN|MVP|CCDC3|GSN|GSDME|COL5A2|H1-10|THAP11|IRS1|TFAP4|UBQLN2|DLL1|CD200|TRIB2|ROBO1|ZNRF3|TSC22D4|IGFBP4|ABHD6|CDKN1B|TMEM176B|VSIG4|HSPB1|NUAK2|ANKRD6|BMPR2|IGF1R|NIBAN2|SEMA4C|OPN3|GLI2|DPF3|PTPRZ1|FGR|…	508	3.7992e-13
enzyme linked receptor protein signaling pathway (GO:0007167)	biological_process	P1	NDN|SEMA6A|EPHB2|HTRA3|WFIKKN2|WWTR1|AMHR2|MMP2|IFI6|FGFBP3|CCBE1|PMEPA1|MVP|COL4A1|IRS1|DLL1|INSRR|ROBO1|IGFBP4|HSPB1|EFNA2|BMPR2|IGF1R|NIBAN2|CD63|FGR|ACTB|BCAR3|COL1A1|FAT4|IL12B|INSR|AMH|DSTYK|ARRB2|ENHO|MVB12A|ZYX|HNRNPA1|SMAD5|PRKCA|NUCKS1|COL3A1|DAB2|STAT6|CSF1R|CHST11|ZFAND5|SMAD3|ARID5B|PCSK6|PTPRE|NEDD9|RHBDF1|HIP1|GRB7|NPR1|TDGF1|ITGAV|SH3KBP1|BMP2|ITGB5|USP9Y|DOCK1|EPHA2|GATA3|ERBB3|A…	156	5.38261e-13
transmembrane receptor protein tyrosine kinase signaling pathway (GO:0007169)	biological_process	P1	NDN|SEMA6A|EPHB2|MMP2|IFI6|FGFBP3|CCBE1|MVP|COL4A1|IRS1|DLL1|INSRR|ROBO1|IGFBP4|HSPB1|EFNA2|IGF1R|NIBAN2|CD63|FGR|ACTB|BCAR3|COL1A1|FAT4|IL12B|INSR|DSTYK|ENHO|MVB12A|HNRNPA1|PRKCA|NUCKS1|STAT6|CSF1R|ZFAND5|ARID5B|PTPRE|NEDD9|RHBDF1|HIP1|GRB7|ITGAV|SH3KBP1|BMP2|DOCK1|EPHA2|GATA3|ERBB3|ANOS1|POLR1G|ERBB4|MTSS1|PIK3R1|CPNE3|ERBB2|GPC1|CRIM1|SOCS3|NRTN|DDR1|FYN|PLCE1|FLT3|ADORA1|VAV2|VEGFA|COL4A2|PRK…	105	3.05968e-08
regulation of cell communication (GO:0010646)	biological_process	P1	SEMA6A|CAPN1|CDH1|BMF|CCDC22|VGLL4|EPHB2|ARHGAP22|SIRPA|HTRA3|CASP4|CCR1|WFIKKN2|PLCL2|ZBED3|SOX4|WWTR1|RGS4|TRIM21|PHF24|RHOC|IFI6|FGFBP3|TCF21|CCBE1|PMEPA1|TNN|MVP|CCDC3|GSDME|NPTXR|IRS1|UBQLN2|DLL1|ROBO1|ZNRF3|IGFBP4|ABHD6|FRMPD1|PPP1CA|ARHGEF3|HSPB1|ANKRD6|BMPR2|IGF1R|NIBAN2|SEMA4C|CD63|GLI2|FGR|TWIST1|CXXC5|RPS3|BCAR3|SLC25A4|MAML3|MAML1|TSKU|YWHAB|COL1A1|NONO|YWHAH|AJUBA|IFI35|IL12B|TRIB3|P…	373	1.13059e-12
regulation of signaling (GO:0023051)	biological_process	P1	SEMA6A|CAPN1|CDH1|BMF|CCDC22|VGLL4|EPHB2|ARHGAP22|SIRPA|HTRA3|CASP4|CCR1|WFIKKN2|PLCL2|ZBED3|SOX4|WWTR1|RGS4|TRIM21|PHF24|RHOC|IFI6|FGFBP3|TCF21|CCBE1|PMEPA1|TNN|MVP|CCDC3|GSDME|NPTXR|IRS1|UBQLN2|DLL1|ROBO1|ZNRF3|IGFBP4|ABHD6|FRMPD1|PPP1CA|ARHGEF3|HSPB1|ANKRD6|BMPR2|IGF1R|NIBAN2|SEMA4C|CD63|GLI2|FGR|TWIST1|CXXC5|RPS3|BCAR3|SLC25A4|ATP1B1|MAML3|MAML1|TSKU|YWHAB|COL1A1|NONO|YWHAH|AJUBA|IFI35|IL12B|…	375	1.8085e-12
regulation of signal transduction (GO:0009966)	biological_process	P1	SEMA6A|CAPN1|BMF|CCDC22|VGLL4|EPHB2|ARHGAP22|SIRPA|HTRA3|CASP4|CCR1|WFIKKN2|PLCL2|ZBED3|SOX4|WWTR1|RGS4|TRIM21|PHF24|RHOC|IFI6|FGFBP3|TCF21|CCBE1|PMEPA1|TNN|MVP|CCDC3|GSDME|NPTXR|IRS1|UBQLN2|DLL1|ROBO1|ZNRF3|IGFBP4|ABHD6|FRMPD1|PPP1CA|ARHGEF3|HSPB1|ANKRD6|BMPR2|IGF1R|NIBAN2|SEMA4C|CD63|GLI2|FGR|TWIST1|CXXC5|RPS3|BCAR3|MAML3|MAML1|TSKU|YWHAB|COL1A1|NONO|AJUBA|IFI35|IL12B|TRIB3|PPIF|ADRB3|INSR|LY6E…	337	4.78694e-12
positive regulation of biological process (GO:0048518)	biological_process	P1	NDN|SEMA6A|CAPN1|CDH1|BMF|CCDC22|ZNF219|VGLL4|EPHB2|WNT6|DDAH1|PATZ1|OSBPL7|C6|SIRPA|CASP4|CCR1|PLCL2|CNPY4|ZBED3|H1-0|KLRK1|SOX4|WWTR1|APOC1|RGS4|ZFHX3|TRIM21|MMP2|RHOC|IRF2|FGFBP3|TCF21|CCBE1|UBTF|MOV10|CREB3L4|MSN|CCDC3|GSN|GSDME|PPIB|H1-10|PLEK2|IRS1|TFAP4|UBQLN2|THEMIS2|DLL1|MR1|PLA2G7|CD200|ZC3HAV1|TRIB2|INSRR|ROBO1|ZNF493|IGFBP4|ABHD6|CDKN1B|SCD|PPP1CA|VSIG4|ARHGEF3|ATP8A1|HSPB1|ANKRD6|BMP…	607	1.39501e-12
positive regulation of cellular process (GO:0048522)	biological_process	P1	NDN|SEMA6A|CAPN1|CDH1|BMF|CCDC22|ZNF219|VGLL4|EPHB2|WNT6|DDAH1|PATZ1|OSBPL7|SIRPA|CASP4|CCR1|CNPY4|ZBED3|H1-0|KLRK1|SOX4|WWTR1|APOC1|RGS4|ZFHX3|TRIM21|MMP2|RHOC|IRF2|FGFBP3|TCF21|CCBE1|UBTF|MOV10|CREB3L4|MSN|CCDC3|GSN|GSDME|H1-10|PLEK2|IRS1|TFAP4|UBQLN2|DLL1|MR1|PLA2G7|ZC3HAV1|TRIB2|INSRR|ROBO1|ZNF493|IGFBP4|CDKN1B|PPP1CA|ARHGEF3|ATP8A1|HSPB1|ANKRD6|BMPR2|FZD2|IGF1R|NIBAN2|SEMA4C|CD63|OPN3|GLI2|D…	556	2.58545e-12
nervous system development (GO:0007399)	biological_process	P1	NDN|SEMA6A|CDH1|EPHB2|WNT6|HAPLN1|BLOC1S1|NAGLU|SOX4|RGS4|ZFHX3|NAV2|DPYSL2|MOV10|TNN|GSN|GSDME|RAB17|COL4A1|DLL1|NINJ2|ROBO1|ZSWIM5|EFNA2|BMPR2|FZD2|NIBAN2|PCARE|SEMA4C|GLI2|DPF3|PTPRZ1|TWIST1|ACTB|DCLK1|TSKU|PLLP|NFIA|FAT4|ALDH5A1|YWHAH|PYGO2|LGALS1|ACHE|ARRB2|DTX1|SOX13|ANXA3|SLC38A2|LSR|NAP1L2|ACSL4|YAP1|ETS1|ZNF536|DEAF1|PRKCA|COL3A1|NEGR1|SEMA6B|NRCAM|BLOC1S5|BEND6|CSF1R|FZD1|PHGDH|SPOCK2|P…	280	1.50607e-12
regulation of localization (GO:0032879)	biological_process	P1	SEMA6A|CAPN1|CDH1|EPHB2|PATZ1|PKIA|SIRPA|CCR1|CNPY4|KLRK1|SOX4|WWTR1|APOC1|KCNJ5|RGS4|TRIM21|PTPN14|RHOC|CCBE1|TNN|MSN|GSN|RAB17|IRS1|UBQLN2|DLL1|PLA2G7|CD200|SCN9A|ROBO1|ZSWIM5|ABHD6|ATP8A1|HSPB1|BMPR2|IGF1R|SEMA4C|CD63|OPN3|FGR|TWIST1|TRPC3|ACTB|LRRC38|SLC25A4|ATP1B1|DCLK1|YWHAB|COL1A1|YWHAH|KCNQ1|AJUBA|IL12B|TRIB3|PPIF|INSR|ACHE|PFN1|ARRB2|ENHO|SIK1|ANXA3|REEP2|ACSL4|RNASEL|YAP1|PLSCR1|ABCA1|E…	314	3.23149e-12
regulation of cellular component movement (GO:0051270)	biological_process	P1	SEMA6A|CDH1|PATZ1|CCR1|KLRK1|RHOC|CCBE1|TNN|MSN|PLA2G7|CD200|ROBO1|ZSWIM5|ABHD6|ATP8A1|HSPB1|BMPR2|IGF1R|SEMA4C|FGR|TWIST1|COL1A1|AJUBA|INSR|PFN1|ANXA3|ETS1|PRKCA|COL3A1|RDX|DAB2|SEMA6B|CSF1R|SMAD3|EMP2|SPOCK2|ELANE|LIMCH1|NEDD9|AMOTL2|NTNG1|LAMA2|GRB7|TDGF1|ITGAV|GLIPR2|SERPINF1|BMP2|DOCK1|CDK6|EPHA2|GATA3|ERBB3|STK24|ADAMTS9|DPYSL3|ANO6|PYCARD|SLC8B1|ERBB4|BMPR1A|RAC2|MAPRE2|APOE|POSTN|ZSWIM4|P…	152	5.7308e-12
regulation of cell motility (GO:2000145)	biological_process	P1	SEMA6A|CDH1|PATZ1|CCR1|KLRK1|RHOC|CCBE1|TNN|MSN|PLA2G7|CD200|ROBO1|ABHD6|ATP8A1|HSPB1|BMPR2|IGF1R|SEMA4C|FGR|TWIST1|COL1A1|AJUBA|INSR|PFN1|ANXA3|ETS1|PRKCA|COL3A1|RDX|DAB2|SEMA6B|CSF1R|SMAD3|EMP2|SPOCK2|ELANE|LIMCH1|NEDD9|AMOTL2|NTNG1|LAMA2|GRB7|TDGF1|ITGAV|GLIPR2|SERPINF1|BMP2|DOCK1|CDK6|EPHA2|GATA3|ERBB3|STK24|ADAMTS9|DPYSL3|ANO6|PYCARD|SLC8B1|ERBB4|BMPR1A|RAC2|MAPRE2|APOE|POSTN|PIK3R1|PDPN|SMA…	144	6.50922e-12
regulation of cell migration (GO:0030334)	biological_process	P1	SEMA6A|CDH1|PATZ1|CCR1|KLRK1|RHOC|CCBE1|TNN|MSN|PLA2G7|CD200|ROBO1|ABHD6|ATP8A1|HSPB1|BMPR2|IGF1R|SEMA4C|FGR|COL1A1|AJUBA|INSR|PFN1|ANXA3|ETS1|PRKCA|COL3A1|RDX|DAB2|SEMA6B|CSF1R|SMAD3|EMP2|ELANE|LIMCH1|NEDD9|AMOTL2|NTNG1|LAMA2|GRB7|TDGF1|ITGAV|GLIPR2|SERPINF1|BMP2|DOCK1|EPHA2|GATA3|STK24|ADAMTS9|DPYSL3|ANO6|PYCARD|SLC8B1|ERBB4|BMPR1A|RAC2|MAPRE2|APOE|POSTN|PIK3R1|PDPN|SMAD7|BCL2|PPP3CA|CPNE3|NAV3…	136	1.89559e-11
regulation of locomotion (GO:0040012)	biological_process	P1	SEMA6A|CDH1|PATZ1|CCR1|KLRK1|RHOC|CCBE1|TNN|MSN|PLA2G7|CD200|ROBO1|ZSWIM5|ABHD6|ATP8A1|HSPB1|BMPR2|IGF1R|SEMA4C|FGR|TWIST1|COL1A1|AJUBA|INSR|PFN1|ANXA3|ETS1|PRKCA|COL3A1|RDX|DAB2|SEMA6B|CSF1R|SMAD3|EMP2|SPOCK2|ELANE|LIMCH1|NEDD9|AMOTL2|NTNG1|LAMA2|GRB7|TDGF1|ITGAV|GLIPR2|SERPINF1|BMP2|DOCK1|CDK6|EPHA2|GATA3|ERBB3|STK24|ADAMTS9|DPYSL3|ANO6|PYCARD|SLC8B1|ERBB4|BMPR1A|RAC2|MAPRE2|APOE|POSTN|ZSWIM4|P…	146	2.97118e-11
cellular component morphogenesis (GO:0032989)	biological_process	P1	NDN|SEMA6A|EPHB2|DPYSL2|MOV10|TNN|ROBO1|ZSWIM5|EFNA2|BMPR2|NIBAN2|SEMA4C|GLI2|ACTB|DCLK1|TSKU|YWHAH|PRKCA|SEMA6B|NRCAM|CSF1R|NTNG1|LAMA2|TWF2|GRB7|KIRREL3|SH3KBP1|OPHN1|LRRC4C|KLF7|EPHA2|GATA3|ANOS1|SYT1|RAC2|LLPH|APOE|POSTN|TRIO|ZSWIM4|RASAL1|PIK3R1|PDPN|NOTCH2|BCL2|PPP3CA|SLITRK6|ERBB2|NEFH|PLXNA1|GPC1|NES|OBSL1|NRTN|DDR1|FYN|CDK5|TAOK3|VEGFA|CD9|LHX9|NRK|VCL|RHOG|NGEF|NTNG2|ZDHHC15|SYT2|MAG|CA…	103	1.33264e-06
neuron projection development (GO:0031175)	biological_process	P1	NDN|SEMA6A|CDH1|EPHB2|BLOC1S1|DPYSL2|MOV10|TNN|RAB17|ROBO1|ZSWIM5|EFNA2|BMPR2|NIBAN2|SEMA4C|GLI2|ACTB|DCLK1|TSKU|FAT4|YWHAH|LGALS1|ACSL4|PRKCA|NEGR1|SEMA6B|NRCAM|BLOC1S5|CSF1R|FZD1|PHGDH|APOA1|NTNG1|LAMA2|TWF2|GRB7|KIRREL3|SERPINF1|SH3KBP1|OPHN1|LRRC4C|KLF7|EPHA2|GATA3|STK24|CD38|ANOS1|SYT1|DPYSL3|STMN3|RAC2|LLPH|APOE|POSTN|TRIO|ZSWIM4|RASAL1|PIK3R1|NOTCH2|BCL2|PPP3CA|SLITRK6|ERBB2|NEFH|PLXNA1|CA…	134	3.33418e-09
neuron development (GO:0048666)	biological_process	P1	NDN|SEMA6A|CDH1|EPHB2|BLOC1S1|NAGLU|DPYSL2|MOV10|TNN|RAB17|ROBO1|ZSWIM5|EFNA2|BMPR2|FZD2|NIBAN2|PCARE|SEMA4C|GLI2|ACTB|DCLK1|TSKU|FAT4|YWHAH|LGALS1|ACSL4|PRKCA|NEGR1|SEMA6B|NRCAM|BLOC1S5|CSF1R|FZD1|PHGDH|APOA1|NTNG1|LAMA2|TWF2|GRB7|KIRREL3|SERPINF1|SH3KBP1|OPHN1|LRRC4C|KLF7|EPHA2|GATA3|STK24|CD38|ANOS1|SYT1|DPYSL3|C1QA|MTCH1|STMN3|RAC2|LLPH|APOE|POSTN|ZMIZ1|TRIO|EDNRB|ZSWIM4|RASAL1|PIK3R1|NOTCH2|…	145	1.09556e-08
axon development (GO:0061564)	biological_process	P1	NDN|SEMA6A|EPHB2|DPYSL2|TNN|ROBO1|ZSWIM5|EFNA2|BMPR2|NIBAN2|SEMA4C|GLI2|ACTB|DCLK1|TSKU|PRKCA|SEMA6B|NRCAM|CSF1R|APOA1|NTNG1|LAMA2|TWF2|GRB7|SH3KBP1|OPHN1|LRRC4C|KLF7|EPHA2|GATA3|STK24|ANOS1|RAC2|APOE|TRIO|ZSWIM4|PIK3R1|NOTCH2|BCL2|SLITRK6|ERBB2|NEFH|PLXNA1|GPC1|NRTN|DDR1|FYN|CDK5|VEGFA|LHX9|GRN|NREP|VCL|RHOG|NTNG2|MAG|EPHA7|CXCR4|EFNB1|LAMB2|NTN4|SEMA7A|NFIB|EPHB3|GAB2|CTNNA1|DAG1|CXCL12|PTPRF|E…	80	6.22521e-08
cell morphogenesis involved in neuron differentiation (GO:0048667)	biological_process	P1	NDN|SEMA6A|EPHB2|DPYSL2|TNN|ROBO1|ZSWIM5|EFNA2|BMPR2|NIBAN2|SEMA4C|GLI2|ACTB|DCLK1|TSKU|YWHAH|PRKCA|SEMA6B|NRCAM|CSF1R|NTNG1|LAMA2|TWF2|GRB7|SH3KBP1|OPHN1|LRRC4C|KLF7|EPHA2|GATA3|ANOS1|RAC2|APOE|TRIO|ZSWIM4|PIK3R1|NOTCH2|BCL2|PPP3CA|SLITRK6|ERBB2|NEFH|PLXNA1|GPC1|OBSL1|NRTN|FYN|CDK5|VEGFA|LHX9|VCL|MEF2C|RHOG|NGEF|NTNG2|ZDHHC15|HES1|MAG|CAMK2B|PTPRD|EPHA7|CXCR4|EFNB1|LAMB2|NTN4|SEMA7A|NFIB|TANC2|E…	83	1.83449e-06
neuron differentiation (GO:0030182)	biological_process	P1	NDN|SEMA6A|CDH1|EPHB2|WNT6|BLOC1S1|NAGLU|SOX4|ZFHX3|DPYSL2|MOV10|TNN|GSDME|RAB17|DLL1|ROBO1|ZSWIM5|EFNA2|BMPR2|FZD2|NIBAN2|PCARE|SEMA4C|GLI2|ACTB|DCLK1|TSKU|FAT4|YWHAH|LGALS1|DTX1|NAP1L2|ACSL4|ZNF536|PRKCA|NEGR1|SEMA6B|NRCAM|BLOC1S5|BEND6|CSF1R|FZD1|PHGDH|APOA1|NTNG1|LAMA2|TWF2|MDGA1|GRB7|KIRREL3|SERPINF1|SH3KBP1|BMP2|OPHN1|ZC4H2|LRRC4C|KLF7|EPHA2|GATA3|STK24|CD38|ANOS1|SYT1|DPYSL3|C1QA|PRPF19|ER…	171	3.81801e-09
neurogenesis (GO:0022008)	biological_process	P1	NDN|SEMA6A|CDH1|EPHB2|WNT6|BLOC1S1|NAGLU|SOX4|ZFHX3|NAV2|DPYSL2|MOV10|TNN|GSN|GSDME|RAB17|DLL1|ROBO1|ZSWIM5|EFNA2|BMPR2|FZD2|NIBAN2|PCARE|SEMA4C|GLI2|PTPRZ1|TWIST1|ACTB|DCLK1|TSKU|FAT4|YWHAH|LGALS1|DTX1|SOX13|NAP1L2|ACSL4|YAP1|ZNF536|PRKCA|COL3A1|NEGR1|SEMA6B|NRCAM|BLOC1S5|BEND6|CSF1R|FZD1|PHGDH|APOA1|NTNG1|LAMA2|TWF2|MDGA1|GRB7|KIRREL3|SERPINF1|SH3KBP1|BMP2|OPHN1|ZC4H2|LRRC4C|KLF7|CDK6|EPHA2|GAT…	207	5.93114e-12
generation of neurons (GO:0048699)	biological_process	P1	NDN|SEMA6A|CDH1|EPHB2|WNT6|BLOC1S1|NAGLU|SOX4|ZFHX3|DPYSL2|MOV10|TNN|GSDME|RAB17|DLL1|ROBO1|ZSWIM5|EFNA2|BMPR2|FZD2|NIBAN2|PCARE|SEMA4C|GLI2|PTPRZ1|TWIST1|ACTB|DCLK1|TSKU|FAT4|YWHAH|LGALS1|DTX1|NAP1L2|ACSL4|YAP1|ZNF536|PRKCA|COL3A1|NEGR1|SEMA6B|NRCAM|BLOC1S5|BEND6|CSF1R|FZD1|PHGDH|APOA1|NTNG1|LAMA2|TWF2|MDGA1|GRB7|KIRREL3|SERPINF1|SH3KBP1|BMP2|OPHN1|ZC4H2|LRRC4C|KLF7|CDK6|EPHA2|GATA3|STK24|CD38|A…	189	3.5587e-10
cell morphogenesis (GO:0000902)	biological_process	P1	NDN|SEMA6A|EPHB2|RHOC|DPYSL2|MOV10|TNN|MSN|ROBO1|ZSWIM5|EFNA2|BMPR2|NIBAN2|SEMA4C|GLI2|FGR|ACTB|DCLK1|TSKU|CDH19|C1GALT1C1|YWHAH|YAP1|PRKCA|RDX|SEMA6B|NRCAM|CSF1R|LIMS2|PLOD3|APOA1|NEDD9|NTNG1|LAMA2|TWF2|GRB7|KIRREL3|ITGAV|FAM171A1|SH3KBP1|OPHN1|DOCK1|CDC42EP4|LRRC4C|KLF7|ITGA8|EPHA2|GATA3|ANOS1|SYT1|GP1BA|ANTXR1|RAC2|LLPH|APOE|POSTN|TRIO|ZSWIM4|RASAL1|PIK3R1|PDPN|NOTCH2|F11R|BCL2|PPP3CA|SLITRK6|…	139	6.34215e-10
axon guidance (GO:0007411)	biological_process	P1	SEMA6A|EPHB2|DPYSL2|ROBO1|ZSWIM5|EFNA2|BMPR2|NIBAN2|SEMA4C|GLI2|PRKCA|SEMA6B|NRCAM|CSF1R|LAMA2|GRB7|SH3KBP1|OPHN1|KLF7|EPHA2|GATA3|ANOS1|RAC2|TRIO|ZSWIM4|PIK3R1|NOTCH2|ERBB2|PLXNA1|GPC1|NRTN|FYN|CDK5|VEGFA|LHX9|RHOG|EPHA7|CXCR4|EFNB1|LAMB2|NTN4|SEMA7A|NFIB|EPHB3|GAB2|DAG1|CXCL12|EFNA4|LAMA3|B3GNT2|SEMA4B|LRP1|PLXNC1|VLDLR|RAC1|EXT1	56	3.23721e-09
neuron projection guidance (GO:0097485)	biological_process	P1	SEMA6A|EPHB2|DPYSL2|ROBO1|ZSWIM5|EFNA2|BMPR2|NIBAN2|SEMA4C|GLI2|PRKCA|SEMA6B|NRCAM|CSF1R|LAMA2|GRB7|SH3KBP1|OPHN1|KLF7|EPHA2|GATA3|ANOS1|RAC2|TRIO|ZSWIM4|PIK3R1|NOTCH2|ERBB2|PLXNA1|GPC1|NRTN|FYN|CDK5|VEGFA|LHX9|RHOG|EPHA7|CXCR4|EFNB1|LAMB2|NTN4|SEMA7A|NFIB|EPHB3|GAB2|DAG1|CXCL12|EFNA4|LAMA3|B3GNT2|SEMA4B|LRP1|PLXNC1|VLDLR|RAC1|EXT1	56	3.60888e-09
cell morphogenesis involved in differentiation (GO:0000904)	biological_process	P1	NDN|SEMA6A|EPHB2|DPYSL2|TNN|ROBO1|ZSWIM5|EFNA2|BMPR2|NIBAN2|SEMA4C|GLI2|ACTB|DCLK1|TSKU|C1GALT1C1|YWHAH|PRKCA|SEMA6B|NRCAM|CSF1R|LIMS2|PLOD3|APOA1|NEDD9|NTNG1|LAMA2|TWF2|GRB7|ITGAV|SH3KBP1|OPHN1|DOCK1|LRRC4C|KLF7|ITGA8|EPHA2|GATA3|ANOS1|ANTXR1|RAC2|APOE|POSTN|TRIO|ZSWIM4|PIK3R1|PDPN|NOTCH2|BCL2|PPP3CA|SLITRK6|TACSTD2|ERBB2|NEFH|PLXNA1|GPC1|OBSL1|NRTN|FYN|CDK5|VEGFA|LHX9|VCL|MEF2C|RHOG|NGEF|NTNG2|…	104	3.13544e-08
cell projection morphogenesis (GO:0048858)	biological_process	P1	NDN|SEMA6A|EPHB2|DPYSL2|MOV10|TNN|ROBO1|ZSWIM5|EFNA2|BMPR2|NIBAN2|SEMA4C|GLI2|ACTB|DCLK1|TSKU|YWHAH|PRKCA|SEMA6B|NRCAM|CSF1R|NTNG1|LAMA2|TWF2|GRB7|KIRREL3|SH3KBP1|OPHN1|LRRC4C|KLF7|EPHA2|GATA3|ANOS1|SYT1|RAC2|LLPH|APOE|POSTN|TRIO|ZSWIM4|RASAL1|PIK3R1|PDPN|NOTCH2|BCL2|PPP3CA|SLITRK6|ERBB2|NEFH|PLXNA1|GPC1|NES|OBSL1|NRTN|DDR1|FYN|CDK5|TAOK3|VEGFA|LHX9|NRK|VCL|RHOG|NGEF|NTNG2|ZDHHC15|SYT2|MAG|CAMK2B…	97	5.19604e-08
neuron projection morphogenesis (GO:0048812)	biological_process	P1	NDN|SEMA6A|EPHB2|DPYSL2|MOV10|TNN|ROBO1|ZSWIM5|EFNA2|BMPR2|NIBAN2|SEMA4C|GLI2|ACTB|DCLK1|TSKU|YWHAH|PRKCA|SEMA6B|NRCAM|CSF1R|NTNG1|LAMA2|TWF2|GRB7|KIRREL3|SH3KBP1|OPHN1|LRRC4C|KLF7|EPHA2|GATA3|ANOS1|SYT1|RAC2|LLPH|APOE|POSTN|TRIO|ZSWIM4|RASAL1|PIK3R1|NOTCH2|BCL2|PPP3CA|SLITRK6|ERBB2|NEFH|PLXNA1|GPC1|OBSL1|NRTN|DDR1|FYN|CDK5|TAOK3|VEGFA|LHX9|NRK|VCL|RHOG|NGEF|NTNG2|ZDHHC15|SYT2|MAG|CAMK2B|PTPRD|EP…	95	5.36747e-08
plasma membrane bounded cell projection morphogenesis (GO:0120039)	biological_process	P1	NDN|SEMA6A|EPHB2|DPYSL2|MOV10|TNN|ROBO1|ZSWIM5|EFNA2|BMPR2|NIBAN2|SEMA4C|GLI2|ACTB|DCLK1|TSKU|YWHAH|PRKCA|SEMA6B|NRCAM|CSF1R|NTNG1|LAMA2|TWF2|GRB7|KIRREL3|SH3KBP1|OPHN1|LRRC4C|KLF7|EPHA2|GATA3|ANOS1|SYT1|RAC2|LLPH|APOE|POSTN|TRIO|ZSWIM4|RASAL1|PIK3R1|PDPN|NOTCH2|BCL2|PPP3CA|SLITRK6|ERBB2|NEFH|PLXNA1|GPC1|OBSL1|NRTN|DDR1|FYN|CDK5|TAOK3|VEGFA|LHX9|NRK|VCL|RHOG|NGEF|NTNG2|ZDHHC15|SYT2|MAG|CAMK2B|PTP…	96	7.66012e-08
cell part morphogenesis (GO:0032990)	biological_process	P1	NDN|SEMA6A|EPHB2|DPYSL2|MOV10|TNN|ROBO1|ZSWIM5|EFNA2|BMPR2|NIBAN2|SEMA4C|GLI2|ACTB|DCLK1|TSKU|YWHAH|PRKCA|SEMA6B|NRCAM|CSF1R|NTNG1|LAMA2|TWF2|GRB7|KIRREL3|SH3KBP1|OPHN1|LRRC4C|KLF7|EPHA2|GATA3|ANOS1|SYT1|RAC2|LLPH|APOE|POSTN|TRIO|ZSWIM4|RASAL1|PIK3R1|PDPN|NOTCH2|BCL2|PPP3CA|SLITRK6|ERBB2|NEFH|PLXNA1|GPC1|NES|OBSL1|NRTN|DDR1|FYN|CDK5|TAOK3|VEGFA|LHX9|NRK|VCL|RHOG|NGEF|NTNG2|ZDHHC15|SYT2|MAG|CAMK2B…	98	8.41436e-08
axonogenesis (GO:0007409)	biological_process	P1	NDN|SEMA6A|EPHB2|DPYSL2|TNN|ROBO1|ZSWIM5|EFNA2|BMPR2|NIBAN2|SEMA4C|GLI2|ACTB|DCLK1|TSKU|PRKCA|SEMA6B|NRCAM|CSF1R|NTNG1|LAMA2|TWF2|GRB7|SH3KBP1|OPHN1|LRRC4C|KLF7|EPHA2|GATA3|ANOS1|RAC2|APOE|TRIO|ZSWIM4|PIK3R1|NOTCH2|BCL2|SLITRK6|ERBB2|NEFH|PLXNA1|GPC1|NRTN|FYN|CDK5|VEGFA|LHX9|VCL|RHOG|NTNG2|MAG|EPHA7|CXCR4|EFNB1|LAMB2|NTN4|SEMA7A|NFIB|EPHB3|GAB2|DAG1|CXCL12|EFNA4|LAMA3|OLFM1|B3GNT2|SEMA4B|LRP1|CDH…	73	2.58019e-07
cell projection organization (GO:0030030)	biological_process	P1	NDN|SEMA6A|CDH1|EPHB2|BLOC1S1|LCA5|WWTR1|DPYSL2|MOV10|TNN|GSN|RAB17|PLEK2|ROBO1|ZSWIM5|EFNA2|BMPR2|IGF1R|NIBAN2|SEMA4C|GLI2|ACTB|DCLK1|TSKU|FAT4|YWHAH|AJUBA|INSR|LGALS1|PFN1|KIF3C|PPP2R1A|ACSL4|YAP1|PRKCA|NEGR1|RDX|SEMA6B|NRCAM|TUBA1A|LIMA1|BLOC1S5|CSF1R|FZD1|PHGDH|EMP2|APOA1|NTNG1|LAMA2|TWF2|GRB7|KIRREL3|SERPINF1|SH3KBP1|OPHN1|CDC42EP4|LRRC4C|PRKAR2B|KLF7|EPHA2|GATA3|STK24|CD38|ANOS1|SYT1|DPYSL3…	177	5.37921e-06
plasma membrane bounded cell projection organization (GO:0120036)	biological_process	P1	NDN|SEMA6A|CDH1|EPHB2|BLOC1S1|LCA5|WWTR1|DPYSL2|MOV10|TNN|GSN|RAB17|PLEK2|ROBO1|ZSWIM5|EFNA2|BMPR2|IGF1R|NIBAN2|SEMA4C|GLI2|ACTB|DCLK1|TSKU|FAT4|YWHAH|AJUBA|INSR|LGALS1|PFN1|KIF3C|PPP2R1A|ACSL4|YAP1|PRKCA|NEGR1|RDX|SEMA6B|NRCAM|TUBA1A|LIMA1|BLOC1S5|CSF1R|FZD1|PHGDH|EMP2|APOA1|NTNG1|LAMA2|TWF2|GRB7|KIRREL3|SERPINF1|SH3KBP1|OPHN1|CDC42EP4|LRRC4C|PRKAR2B|KLF7|EPHA2|GATA3|STK24|CD38|ANOS1|SYT1|DPYSL3…	173	6.46695e-06
chemotaxis (GO:0006935)	biological_process	P1	SEMA6A|EPHB2|CCR1|KLRK1|DPYSL2|PPIB|PLA2G7|ROBO1|ZSWIM5|HSPB1|EFNA2|BMPR2|NIBAN2|SEMA4C|GLI2|ARRB2|PRKCA|SEMA6B|NRCAM|CSF1R|SMAD3|APOA1|ELANE|LAMA2|GRB7|ITGAV|SH3KBP1|OPHN1|KLF7|EPHA2|GATA3|ANOS1|ANO6|SLC8B1|ARHGEF16|RAC2|PLA2G1B|TRIO|EDNRB|ZSWIM4|PIK3R1|NOTCH2|ERBB2|PLXNA1|GPC1|NRTN|ITGA2|FYN|CDK5|VEGFA|LHX9|PRKD1|RHOG|GAS6|PPIA|IL6R|PDGFA|EPHA7|CXCR4|EFNB1|FGF10|LAMB2|NTN4|PLGRKT|SEMA7A|NFIB|EP…	84	2.70894e-05
taxis (GO:0042330)	biological_process	P1	SEMA6A|EPHB2|CCR1|KLRK1|DPYSL2|PPIB|PLA2G7|ROBO1|ZSWIM5|HSPB1|EFNA2|BMPR2|NIBAN2|SEMA4C|GLI2|ARRB2|PRKCA|SEMA6B|NRCAM|CSF1R|SMAD3|APOA1|ELANE|LAMA2|GRB7|ITGAV|SH3KBP1|OPHN1|KLF7|EPHA2|GATA3|ANOS1|ANO6|SLC8B1|ARHGEF16|RAC2|PLA2G1B|TRIO|EDNRB|ZSWIM4|PIK3R1|NOTCH2|ERBB2|PLXNA1|GPC1|NRTN|ITGA2|FYN|CDK5|VEGFA|LHX9|PRKD1|RHOG|GAS6|PPIA|IL6R|PDGFA|EPHA7|CXCR4|EFNB1|FGF10|LAMB2|NTN4|PLGRKT|SEMA7A|NFIB|EP…	84	3.01006e-05
cell differentiation (GO:0030154)	biological_process	P1	NDN|FAM20C|SEMA6A|CAPN1|ILDR2|CDH1|ZNF219|EPHB2|WNT6|PATZ1|ARHGAP22|BLOC1S1|FLNB|CCR1|WFIKKN2|PLCL2|KLRK1|NAGLU|SOX4|WWTR1|RGS4|ZFHX3|MMP2|RPS3A|NAV2|TCF21|DPYSL2|MOV10|TNN|MSN|CCDC3|GSN|GSDME|COL5A2|RAB17|COL4A1|DLL1|MR1|TRIB2|ROBO1|ZSWIM5|TMEM176B|EFNA2|BMPR2|FZD2|NIBAN2|PCARE|SEMA4C|CD63|OPN3|GLI2|PTPRZ1|FGR|TWIST1|EID1|ACTB|TET1|DCLK1|COL27A1|MAML1|TSKU|FOXJ2|C1GALT1C1|COL1A1|FAT4|YWHAH|NKX6-…	437	1.10456e-11
cellular developmental process (GO:0048869)	biological_process	P1	NDN|FAM20C|SEMA6A|CAPN1|ILDR2|CDH1|ZNF219|EPHB2|WNT6|PATZ1|ARHGAP22|BLOC1S1|FLNB|CCR1|WFIKKN2|PLCL2|KLRK1|NAGLU|SOX4|WWTR1|RGS4|ZFHX3|MMP2|RPS3A|NAV2|TCF21|DPYSL2|MOV10|TNN|MSN|CCDC3|GSN|GSDME|COL5A2|RAB17|COL4A1|DLL1|MR1|TRIB2|ROBO1|ZSWIM5|TMEM176B|EFNA2|BMPR2|FZD2|NIBAN2|PCARE|SEMA4C|CD63|OPN3|GLI2|PTPRZ1|FGR|TWIST1|EID1|ACTB|TET1|DCLK1|COL27A1|MAML1|TSKU|FOXJ2|C1GALT1C1|COL1A1|FAT4|YWHAH|NKX6-…	439	7.20847e-11
regulation of multicellular organismal process (GO:0051239)	biological_process	P1	SEMA6A|ZNF219|VGLL4|EPHB2|WNT6|DDAH1|PATZ1|SIRPA|CCR1|PLCL2|ZBED3|SOX4|WWTR1|APOC1|KCNJ5|RGS4|TRIM21|CCBE1|MOV10|PPIB|ADAMTS5|NPTXR|DTX4|DLL1|CD200|TRIB2|ROBO1|ABHD6|TMEM176B|SCD|VSIG4|HSPB1|BMPR2|IGF1R|NIBAN2|SEMA4C|GLI2|PTPRZ1|FGR|TWIST1|TRPC3|RPS3|ATP1B1|TSKU|FOXJ2|COL1A1|FAT4|YWHAH|KCNQ1|NKX6-3|IL12B|ADRB3|INSR|ACHE|PFN1|ARRB2|CD28|DTX1|SOX13|ANXA3|TRIM56|GATA6|YAP1|ABCA1|ETS1|PRKCA|ZFP36L2|D…	307	1.89559e-11
extracellular matrix organization (GO:0030198)	biological_process	P1	CAPN1|CDH1|HAPLN1|MMP23B|MMP2|ADAMTS5|COL5A2|COL4A1|COL27A1|HAS3|COL1A1|COLGALT1|SH3PXD2A|ETS1|COL3A1|SERPINH1|SMAD3|SPOCK2|PLOD3|ELANE|NTNG1|LAMA2|ITGAV|WT1|BMP2|ITGB5|MMP15|ITGA8|ADAMTS9|ADAMTS7|ANTXR1|COL5A1|POSTN|CTRB1|LOXL2|PDPN|F11R|SMOC1|DDR1|ITGA2|ITGA6|FSCN1|FERMT1|COL4A2|SOX9|VCAN|MMP14|NID1|VWA1|NTNG2|GAS6|TLL1|LOXL4|PDGFA|COL18A1|ITGA3|DDR2|JAM2|LAMB2|NTN4|SPARC|LTBP3|CD47|EMILIN1|BCL…	75	2.82091e-11
extracellular structure organization (GO:0043062)	biological_process	P1	CAPN1|CDH1|HAPLN1|MMP23B|MMP2|ADAMTS5|COL5A2|COL4A1|COL27A1|HAS3|COL1A1|COLGALT1|SH3PXD2A|ETS1|COL3A1|SERPINH1|SMAD3|SPOCK2|PLOD3|ELANE|NTNG1|LAMA2|ITGAV|WT1|BMP2|ITGB5|MMP15|ITGA8|ADAMTS9|ADAMTS7|ANTXR1|COL5A1|POSTN|CTRB1|LOXL2|PDPN|F11R|SMOC1|DDR1|ITGA2|ITGA6|FSCN1|FERMT1|COL4A2|SOX9|VCAN|MMP14|NID1|VWA1|NTNG2|GAS6|TLL1|LOXL4|PDGFA|COL18A1|ITGA3|DDR2|JAM2|LAMB2|NTN4|SPARC|LTBP3|CD47|EMILIN1|BCL…	75	3.01498e-11
external encapsulating structure organization (GO:0045229)	biological_process	P1	CAPN1|CDH1|HAPLN1|MMP23B|MMP2|ADAMTS5|COL5A2|COL4A1|COL27A1|HAS3|COL1A1|COLGALT1|SH3PXD2A|ETS1|COL3A1|SERPINH1|SMAD3|SPOCK2|PLOD3|ELANE|NTNG1|LAMA2|ITGAV|WT1|BMP2|ITGB5|MMP15|ITGA8|ADAMTS9|ADAMTS7|ANTXR1|COL5A1|POSTN|CTRB1|LOXL2|PDPN|F11R|SMOC1|DDR1|ITGA2|ITGA6|FSCN1|FERMT1|COL4A2|SOX9|VCAN|MMP14|NID1|VWA1|NTNG2|GAS6|TLL1|LOXL4|PDGFA|COL18A1|ITGA3|DDR2|JAM2|LAMB2|NTN4|SPARC|LTBP3|CD47|EMILIN1|BCL…	75	3.88246e-11
viral process (GO:0016032)	biological_process	P1	ATF7|IFITM2|RPS4Y1|TRIM21|RPS3A|MOV10|MSN|GSN|PPIB|TFAP4|RPL39|ZC3HAV1|PPP1CA|HSPB1|IGF1R|CHD6|RPS3|SLC25A4|YWHAB|NFIA|RPL29|TSPAN7|INSR|LY6E|TLN1|LGALS1|KDM4A|RPS16|CD28|MVB12A|ZYX|RNASEL|PLSCR1|HNRNPA1|NUCKS1|RPL35|CSF1R|RAB6A|SMAD3|OAS1|RPS28|RPS13|TICAM1|SERINC5|VDAC1|RPL12|RPS4X|ITGAV|ITGB5|RPL18A|RPLP2|FAM111A|RPL36|EPHA2|CLEC4M|RPS5|C1QA|RPL8|RPL11|CCDC85B|RPL10A|HSPD1|APOE|CHMP4C|IFI16|PI…	136	4.45776e-11
biological process involved in symbiotic interaction (GO:0044403)	biological_process	P1	CDH1|ATF7|IFITM2|RPS4Y1|TRIM21|RPS3A|MOV10|MSN|GSN|PPIB|TFAP4|RPL39|ZC3HAV1|PPP1CA|HSPB1|IGF1R|CHD6|RPS3|SLC25A4|YWHAB|NFIA|RPL29|TSPAN7|INSR|LY6E|TLN1|LGALS1|KDM4A|RPS16|CD28|MVB12A|ZYX|RNASEL|PLSCR1|HNRNPA1|NUCKS1|RPL35|CSF1R|RAB6A|SMAD3|OAS1|ELANE|RPS28|RPS13|TICAM1|SERINC5|VDAC1|RPL12|RPS4X|ITGAV|ITGB5|RPL18A|RPLP2|FAM111A|RPL36|EPHA2|CLEC4M|RPS5|C1QA|RPL8|RPL11|CCDC85B|RPL10A|HSPD1|APOE|CHMP…	141	9.64475e-11
cell-cell adhesion (GO:0098609)	biological_process	P1	CDH1|KIRREL1|SIRPA|KLRK1|SOX4|PCDHGA6|MSN|FAT1|CD200|NINJ2|ROBO1|PPP1CA|VSIG4|HSPB1|GLI2|RPS3|ACTB|PCDHGC3|SERPINB8|CDH19|MYL12A|FAT4|AJUBA|IL12B|TLN1|LGALS1|PCDHGB6|TRO|CD28|DTX1|SOX13|ETS1|PRKCA|NEGR1|RDX|NRCAM|LIMS2|APOA1|ELANE|NTNG1|ZFP36L1|MDGA1|KIRREL3|ITGAV|BMP2|ITGB5|PCDHGB4|LRRC4C|NLGN2|ITGA8|CLEC4M|GATA3|TNFSF13B|GP1BA|NFKBID|PYCARD|LRFN3|RAC2|PRNP|HSPD1|ZMIZ1|PCDHGA3|PIK3R1|PDPN|LRFN5|…	129	6.4496e-11
angiogenesis (GO:0001525)	biological_process	P1	SEMA6A|EPHB2|DDAH1|ARHGAP22|MMP2|TCF21|CCBE1|COL4A1|DLL1|ROBO1|HSPB1|NIBAN2|TWIST1|FOXJ2|IL12B|ANXA3|GATA6|ETS1|PRKCA|NRCAM|EMP2|AMOTL2|NPR1|TDGF1|ITGAV|SERPINF1|EPHA2|ADAMTS9|TNFRSF12A|ARHGAP24|ENPEP|EPAS1|LOXL2|NOTCH2|ANG|ERBB2|EGLN1|RAPGEF3|VAV2|VEGFA|CEMIP2|GRN|STAB1|COL4A2|PRKD1|MMP14|TGFBR2|PDGFA|COL18A1|CHI3L1|NFE2L2|ANPEP|TNFAIP2|CXCR4|FGF10|SPARC|GATA4|MYH9|MIR503|EMILIN1|EPHB3|SYK|JAG1|…	75	9.45437e-05
tube morphogenesis (GO:0035239)	biological_process	P1	SEMA6A|EPHB2|WNT6|DDAH1|ARHGAP22|SOX4|MMP2|TCF21|CCBE1|COL4A1|DLL1|ROBO1|PPP1CA|HSPB1|BMPR2|FZD2|NIBAN2|SEMA4C|GLI2|TWIST1|FOXJ2|FAT4|IL12B|ANXA3|GATA6|YAP1|ETS1|LRP5|DEAF1|PRKCA|NRCAM|CSF1R|SMAD3|EMP2|AMOTL2|ZFP36L1|NPR1|TDGF1|ITGAV|SERPINF1|WT1|BMP2|TNNI3|MTHFD1|LGR4|EPHA2|GATA3|ADAMTS9|TNFRSF12A|MTSS1|BMPR1A|ARHGAP24|ENPEP|APOE|ZMIZ1|EPAS1|LOXL2|ZFPM2|PDPN|NOTCH2|SMAD7|BCL2|MED12|ANG|TACSTD2|E…	123	3.20744e-09
tube development (GO:0035295)	biological_process	P1	SEMA6A|EPHB2|WNT6|DDAH1|ARHGAP22|SOX4|WWTR1|MMP2|TCF21|CCBE1|COL4A1|DLL1|ROBO1|PPP1CA|HSPB1|BMPR2|FZD2|NIBAN2|SEMA4C|GLI2|TWIST1|NFIA|FOXJ2|FAT4|IL12B|SLC4A2|ANXA3|GATA6|YAP1|ETS1|SMAD5|LRP5|DEAF1|PRKCA|NRCAM|CSF1R|PHGDH|SMAD3|EMP2|PLOD3|AMOTL2|ZFP36L1|NPR1|TDGF1|ITGAV|SERPINF1|WT1|BMP2|TNNI3|MTHFD1|LGR4|EPHA2|GATA3|ADAMTS9|TNFRSF12A|MTSS1|BMPR1A|ARHGAP24|ENPEP|APOE|ZMIZ1|EPAS1|EDNRB|LOXL2|ZFPM2|…	137	5.26016e-08
circulatory system development (GO:0072359)	biological_process	P1	SEMA6A|VGLL4|EPHB2|DDAH1|ARHGAP22|SOX4|RGS4|PTPN14|MMP2|TCF21|CCBE1|COL4A1|DLL1|ROBO1|CDKN1B|HSPB1|BMPR2|FZD2|NIBAN2|GLI2|TWIST1|MAML1|FOXJ2|COL1A1|FAT4|KCNQ1|IL12B|INSR|ARRB2|SIK1|ANXA3|GATA6|YAP1|ETS1|LRP5|PRKCA|COL3A1|ALPK3|NRCAM|ZFAND5|SMAD3|EMP2|AMOTL2|ZFP36L1|NPR1|TDGF1|ITGAV|SERPINF1|WT1|NPY2R|BMP2|TNNI3|PDLIM3|MTHFD1|EPHA2|GATA3|ERBB3|ADAMTS9|NDP|TNFRSF12A|ERBB4|ANTXR1|BMPR1A|DAND5|COL5A1…	153	6.55595e-11
vasculature development (GO:0001944)	biological_process	P1	SEMA6A|EPHB2|DDAH1|ARHGAP22|SOX4|PTPN14|MMP2|TCF21|CCBE1|COL4A1|DLL1|ROBO1|HSPB1|BMPR2|NIBAN2|TWIST1|FOXJ2|COL1A1|IL12B|ANXA3|GATA6|YAP1|ETS1|LRP5|PRKCA|NRCAM|ZFAND5|EMP2|AMOTL2|ZFP36L1|NPR1|TDGF1|ITGAV|SERPINF1|WT1|TNNI3|EPHA2|ADAMTS9|NDP|TNFRSF12A|ANTXR1|BMPR1A|COL5A1|ARHGAP24|ENPEP|APOE|ZMIZ1|EPAS1|LOXL2|ZFPM2|PDPN|NOTCH2|SMAD7|ANG|ERBB2|EGLN1|CITED1|RIN2|SOCS3|RAPGEF3|VAV2|VEGFA|CEMIP2|GRN|ST…	110	5.31469e-09
blood vessel development (GO:0001568)	biological_process	P1	SEMA6A|EPHB2|DDAH1|ARHGAP22|SOX4|MMP2|TCF21|CCBE1|COL4A1|DLL1|ROBO1|HSPB1|BMPR2|NIBAN2|TWIST1|FOXJ2|COL1A1|IL12B|ANXA3|GATA6|YAP1|ETS1|LRP5|PRKCA|NRCAM|EMP2|AMOTL2|ZFP36L1|NPR1|TDGF1|ITGAV|SERPINF1|WT1|TNNI3|EPHA2|ADAMTS9|TNFRSF12A|ANTXR1|BMPR1A|COL5A1|ARHGAP24|ENPEP|APOE|ZMIZ1|EPAS1|LOXL2|ZFPM2|NOTCH2|SMAD7|ANG|ERBB2|EGLN1|CITED1|RIN2|SOCS3|RAPGEF3|VAV2|VEGFA|CEMIP2|GRN|STAB1|COL4A2|PRKD1|MEF2C|…	106	8.96114e-09
blood vessel morphogenesis (GO:0048514)	biological_process	P1	SEMA6A|EPHB2|DDAH1|ARHGAP22|SOX4|MMP2|TCF21|CCBE1|COL4A1|DLL1|ROBO1|HSPB1|BMPR2|NIBAN2|TWIST1|FOXJ2|IL12B|ANXA3|GATA6|YAP1|ETS1|LRP5|PRKCA|NRCAM|EMP2|AMOTL2|ZFP36L1|NPR1|TDGF1|ITGAV|SERPINF1|WT1|TNNI3|EPHA2|ADAMTS9|TNFRSF12A|BMPR1A|ARHGAP24|ENPEP|APOE|ZMIZ1|EPAS1|LOXL2|ZFPM2|NOTCH2|SMAD7|ANG|ERBB2|EGLN1|CITED1|RIN2|RAPGEF3|VAV2|VEGFA|CEMIP2|GRN|STAB1|COL4A2|PRKD1|MMP14|HES1|TBX2|TGFBR2|PDGFA|COL1…	96	3.59337e-08
anatomical structure formation involved in morphogenesis (GO:0048646)	biological_process	P1	FAM20C|SEMA6A|ZNF219|EPHB2|WNT6|DDAH1|ARHGAP22|SOX4|PTPN14|MMP2|TCF21|CCBE1|COL5A2|COL4A1|DLL1|ROBO1|HSPB1|BMPR2|FZD2|NIBAN2|SEMA4C|GLI2|TWIST1|TET1|FOXJ2|COL1A1|IL12B|ANXA3|GATA6|YAP1|SH3PXD2A|ETS1|DEAF1|PRKCA|NRCAM|SMAD3|EMP2|AMOTL2|NPR1|TDGF1|ITGAV|SERPINF1|WT1|BMP2|ITGB5|OPHN1|MMP15|MTHFD1|ITGA8|EPHA2|GATA3|ADAMTS9|TNFSF13B|TNFRSF12A|BMPR1A|COL5A1|ARHGAP24|ENPEP|EPAS1|LOXL2|PDPN|NOTCH2|MED12|…	136	2.894e-06
biological regulation (GO:0065007)	biological_process	P1	NDN|ADGRD2|LSM7|SEMA6A|CAPN1|ILDR2|CDH1|BMF|CCDC22|ZNF219|VGLL4|EPHB2|WNT6|DDAH1|PATZ1|ARHGAP22|GGT1|OSBPL7|C6|ZNF347|PKIA|SIRPA|HTRA3|FLNB|CASP4|CCR1|LCA5|ATF7|WFIKKN2|PLCL2|ZNF835|CNPY4|MTMR8|GNG2|ZBED3|IFITM2|H1-0|STOX2|KLRK1|SOX4|PHF6|WWTR1|APOC1|RPS4Y1|KCNJ5|RGS4|ZFHX3|TRIM21|PTPN14|AMHR2|MMP2|PHF24|TBC1D9|RHOC|RASSF6|IRF2|RPS3A|IFI6|FGFBP3|ATP10D|SLC22A17|TCF21|CCBE1|PMEPA1|DPYSL2|UBTF|MOV1…	1083	1.12452e-10
regulation of biological process (GO:0050789)	biological_process	P1	NDN|ADGRD2|LSM7|SEMA6A|CAPN1|CDH1|BMF|CCDC22|ZNF219|VGLL4|EPHB2|WNT6|DDAH1|PATZ1|ARHGAP22|GGT1|OSBPL7|C6|ZNF347|PKIA|SIRPA|HTRA3|FLNB|CASP4|CCR1|ATF7|WFIKKN2|PLCL2|ZNF835|CNPY4|MTMR8|GNG2|ZBED3|IFITM2|H1-0|STOX2|KLRK1|SOX4|PHF6|WWTR1|APOC1|RPS4Y1|KCNJ5|RGS4|ZFHX3|TRIM21|PTPN14|AMHR2|MMP2|PHF24|RHOC|RASSF6|IRF2|RPS3A|IFI6|FGFBP3|TCF21|CCBE1|PMEPA1|DPYSL2|UBTF|MOV10|TNN|MVP|CREB3L4|MSN|CCDC3|GSN|GS…	1022	7.30621e-09
cell communication (GO:0007154)	biological_process	P1	NDN|ADGRD2|SEMA6A|CAPN1|ILDR2|CDH1|BMF|CCDC22|ZNF219|VGLL4|EPHB2|WNT6|DDAH1|ARHGAP22|SIRPA|HTRA3|FLNB|CASP4|CCR1|WFIKKN2|PLCL2|GNG2|ZBED3|IFITM2|KLRK1|SOX4|WWTR1|KCNJ5|RGS4|TRIM21|AMHR2|MMP2|PHF24|RHOC|RASSF6|IRF2|IFI6|FGFBP3|TCF21|CCBE1|PMEPA1|DPYSL2|MOV10|TNN|MVP|CREB3L4|MSN|CCDC3|GSN|GSDME|EXTL2|COL4A1|FAT1|NPTXR|PLEK2|IRS1|GNRHR|TFAP4|DTX4|UBQLN2|THEMIS2|DLL1|SCN9A|INSRR|ROBO1|ZNRF3|IGFBP4|AB…	628	1.2306e-10
signaling (GO:0023052)	biological_process	P1	NDN|ADGRD2|SEMA6A|CAPN1|ILDR2|CDH1|BMF|CCDC22|ZNF219|VGLL4|EPHB2|WNT6|DDAH1|ARHGAP22|SIRPA|HTRA3|FLNB|CASP4|CCR1|WFIKKN2|PLCL2|GNG2|ZBED3|IFITM2|KLRK1|SOX4|WWTR1|KCNJ5|RGS4|TRIM21|AMHR2|MMP2|PHF24|RHOC|RASSF6|IRF2|IFI6|FGFBP3|TCF21|CCBE1|PMEPA1|DPYSL2|MOV10|TNN|MVP|CREB3L4|MSN|CCDC3|GSN|GSDME|EXTL2|COL4A1|FAT1|NPTXR|PLEK2|IRS1|GNRHR|TFAP4|DTX4|UBQLN2|THEMIS2|DLL1|SCN9A|INSRR|ROBO1|ZNRF3|IGFBP4|AB…	626	1.78862e-10
signal transduction (GO:0007165)	biological_process	P1	NDN|ADGRD2|SEMA6A|CAPN1|BMF|CCDC22|ZNF219|VGLL4|EPHB2|WNT6|DDAH1|ARHGAP22|SIRPA|HTRA3|FLNB|CASP4|CCR1|WFIKKN2|PLCL2|GNG2|ZBED3|IFITM2|KLRK1|SOX4|WWTR1|RGS4|TRIM21|AMHR2|MMP2|PHF24|RHOC|RASSF6|IRF2|IFI6|FGFBP3|TCF21|CCBE1|PMEPA1|DPYSL2|MOV10|TNN|MVP|CREB3L4|MSN|CCDC3|GSN|GSDME|EXTL2|COL4A1|NPTXR|PLEK2|IRS1|GNRHR|TFAP4|DTX4|UBQLN2|THEMIS2|DLL1|INSRR|ROBO1|ZNRF3|IGFBP4|ABHD6|CDKN1B|FRMPD1|PPP1CA|ARH…	575	1.10625e-08
regulation of cell differentiation (GO:0045595)	biological_process	P1	SEMA6A|ZNF219|EPHB2|CCR1|SOX4|WWTR1|RGS4|ZFHX3|DPYSL2|MOV10|TNN|CCDC3|COL5A2|DLL1|TRIB2|ROBO1|TMEM176B|BMPR2|NIBAN2|SEMA4C|GLI2|PTPRZ1|TWIST1|EID1|MAML1|TSKU|FOXJ2|COL1A1|FAT4|YWHAH|NKX6-3|IL12B|TRIB3|ARRB2|CD28|DTX1|SOX13|SIK1|PPP2R1A|NAP1L2|GATA6|YAP1|ABCA1|ETS1|ZNF536|SMAD5|LRP5|PRKCA|ZFP36L2|DAB2|SEMA6B|NRCAM|BLOC1S5|BEND6|LIMS2|TMEM176A|SMAD3|EMP2|SPOCK2|APOA1|NEDD9|ZEB2|ZFP36L1|TWF2|TCF23|I…	197	2.1128e-10
negative regulation of response to stimulus (GO:0048585)	biological_process	P1	SEMA6A|CCDC22|VGLL4|EPHB2|DDAH1|SIRPA|HTRA3|WFIKKN2|PLCL2|KLRK1|WWTR1|RGS4|TRIM21|IFI6|TCF21|PMEPA1|TNN|MVP|CCDC3|IRS1|UBQLN2|DLL1|CD200|ROBO1|ZNRF3|IGFBP4|VSIG4|HSPB1|ANKRD6|IGF1R|NIBAN2|SEMA4C|GLI2|TWIST1|RPS3|TSKU|YWHAB|NONO|AJUBA|IFI35|IL12B|TRIB3|PPIF|ARRB2|SOX13|ENHO|PPP2R1A|YAP1|FBP1|DLK1|ZNF536|COL3A1|DAB2|SEMA6B|MAGEF1|BEND6|CHST11|NLRC5|RNF43|SMAD3|APOA1|ELANE|PTPRE|TICAM1|PARP14|ITGAV|…	203	2.65345e-10
negative regulation of cell communication (GO:0010648)	biological_process	P1	SEMA6A|CCDC22|VGLL4|EPHB2|SIRPA|HTRA3|WFIKKN2|PLCL2|WWTR1|RGS4|IFI6|TCF21|PMEPA1|TNN|MVP|CCDC3|IRS1|UBQLN2|DLL1|ROBO1|ZNRF3|IGFBP4|ABHD6|HSPB1|ANKRD6|IGF1R|NIBAN2|GLI2|TWIST1|TSKU|YWHAB|NONO|AJUBA|IFI35|IL12B|TRIB3|PPIF|ACHE|ARRB2|SOX13|ENHO|PPP2R1A|YAP1|FBP1|DLK1|ZNF536|DAB2|BEND6|CHST11|NLRC5|RNF43|SMAD3|APOA1|PTPRE|TICAM1|PARP14|ITGAV|SH3KBP1|NPY2R|BMP2|KLF7|LGR4|WIF1|EPHA2|SH3BP4|CAMK2N1|GATA…	173	3.89844e-09
negative regulation of signaling (GO:0023057)	biological_process	P1	SEMA6A|CCDC22|VGLL4|EPHB2|SIRPA|HTRA3|WFIKKN2|PLCL2|WWTR1|RGS4|IFI6|TCF21|PMEPA1|TNN|MVP|CCDC3|IRS1|UBQLN2|DLL1|ROBO1|ZNRF3|IGFBP4|ABHD6|HSPB1|ANKRD6|IGF1R|NIBAN2|GLI2|TWIST1|TSKU|YWHAB|NONO|AJUBA|IFI35|IL12B|TRIB3|PPIF|ACHE|ARRB2|SOX13|ENHO|PPP2R1A|YAP1|FBP1|DLK1|ZNF536|DAB2|BEND6|CHST11|NLRC5|RNF43|SMAD3|APOA1|PTPRE|TICAM1|PARP14|ITGAV|SH3KBP1|NPY2R|BMP2|KLF7|LGR4|WIF1|EPHA2|SH3BP4|CAMK2N1|GATA…	173	4.55639e-09
negative regulation of signal transduction (GO:0009968)	biological_process	P1	SEMA6A|CCDC22|VGLL4|EPHB2|SIRPA|HTRA3|WFIKKN2|PLCL2|WWTR1|RGS4|IFI6|TCF21|PMEPA1|TNN|MVP|CCDC3|IRS1|UBQLN2|DLL1|ROBO1|ZNRF3|IGFBP4|HSPB1|ANKRD6|IGF1R|NIBAN2|GLI2|TWIST1|TSKU|YWHAB|NONO|AJUBA|IFI35|IL12B|TRIB3|PPIF|ARRB2|SOX13|ENHO|PPP2R1A|YAP1|FBP1|DLK1|ZNF536|DAB2|BEND6|CHST11|NLRC5|RNF43|SMAD3|APOA1|PTPRE|TICAM1|PARP14|ITGAV|SH3KBP1|NPY2R|BMP2|LGR4|WIF1|EPHA2|SH3BP4|CAMK2N1|GATA3|ERBB3|APC2|PYC…	163	5.32918e-09
positive regulation of developmental process (GO:0051094)	biological_process	P1	ZNF219|EPHB2|WNT6|DDAH1|CCR1|ZBED3|SOX4|WWTR1|CCBE1|CCDC3|PPIB|DLL1|ROBO1|HSPB1|BMPR2|NIBAN2|GLI2|PTPRZ1|TWIST1|MAML1|COL1A1|IL12B|INSR|ARRB2|CD28|SOX13|ANXA3|NAP1L2|GATA6|YAP1|ETS1|SMAD5|LRP5|PRKCA|DAB2|NRCAM|BLOC1S5|BEND6|LIMS2|SMAD3|APOA1|NEDD9|ZEB2|ZFP36L1|TWF2|GLIPR2|SERPINF1|WT1|BMP2|ZC4H2|DOCK1|NLGN2|LGR4|WIF1|GATA3|ERBB3|SYT1|TNFSF13B|ANO6|NFKBID|YPEL3|PRPF19|ERBB4|BMPR1A|LLPH|APOE|ZMIZ1|…	165	5.41173e-10
positive regulation of cell differentiation (GO:0045597)	biological_process	P1	ZNF219|EPHB2|CCR1|SOX4|WWTR1|CCDC3|ROBO1|BMPR2|NIBAN2|GLI2|PTPRZ1|TWIST1|MAML1|COL1A1|IL12B|ARRB2|SOX13|NAP1L2|GATA6|YAP1|ETS1|SMAD5|LRP5|PRKCA|DAB2|NRCAM|BLOC1S5|BEND6|LIMS2|SMAD3|APOA1|NEDD9|ZEB2|ZFP36L1|TWF2|GLIPR2|SERPINF1|BMP2|ZC4H2|DOCK1|WIF1|GATA3|NFKBID|PRPF19|BMPR1A|ZMIZ1|LOXL2|OLFM2|PDPN|NOTCH2|F11R|SMAD7|BCL2|TACSTD2|PLXNA1|SMARCD3|RIN2|BCL9L|GPC1|OBSL1|SOCS3|SOX10|VEGFA|PRKD1|SOX9|MEF…	108	1.96949e-06
response to chemical (GO:0042221)	biological_process	P1	NDN|SEMA6A|ILDR2|CDH1|EPHB2|WNT6|DDAH1|GGT1|OSBPL7|SIRPA|HTRA3|CASP4|CCR1|WFIKKN2|GNG2|ZBED3|IFITM2|KLRK1|SOX4|RGS4|ZFHX3|TRIM21|PTPN14|AMHR2|MMP2|IRF2|IFI6|FGFBP3|TCF21|CCBE1|PMEPA1|DPYSL2|CREB3L4|MSN|CCDC3|GSN|GSDME|PPIB|EXTL2|COL5A2|COL4A1|S100A16|PTPN5|IRS1|GNRHR|TFAP4|UBQLN2|CYP2A6|DLL1|PLA2G7|SCN9A|INSRR|ROBO1|ZSWIM5|CDKN1B|SCD|PPP1CA|HSPB1|EFNA2|BMPR2|IGF1R|NIBAN2|SEMA4C|CD63|GLI2|CHD6|PTP…	461	5.41173e-10
regulation of response to stimulus (GO:0048583)	biological_process	P1	SEMA6A|CAPN1|BMF|CCDC22|VGLL4|EPHB2|DDAH1|ARHGAP22|GGT1|C6|SIRPA|HTRA3|CASP4|CCR1|WFIKKN2|PLCL2|ZBED3|KLRK1|SOX4|WWTR1|RGS4|TRIM21|PHF24|RHOC|IFI6|FGFBP3|TCF21|CCBE1|PMEPA1|TNN|MVP|CCDC3|GSDME|NPTXR|IRS1|UBQLN2|THEMIS2|DLL1|MR1|PLA2G7|CD200|ROBO1|ZNRF3|ZSWIM5|IGFBP4|ABHD6|FRMPD1|PPP1CA|VSIG4|ARHGEF3|HSPB1|ANKRD6|BMPR2|IGF1R|NIBAN2|SEMA4C|CD63|GLI2|FGR|TWIST1|CXXC5|TRPC3|RPS3|ACTB|BCAR3|MAML3|MAML…	420	1.0046e-09
positive regulation of multicellular organismal process (GO:0051240)	biological_process	P1	ZNF219|EPHB2|WNT6|DDAH1|CCR1|ZBED3|SOX4|WWTR1|RGS4|CCBE1|PPIB|DLL1|CD200|ROBO1|SCD|HSPB1|BMPR2|IGF1R|NIBAN2|GLI2|PTPRZ1|FGR|TWIST1|TRPC3|RPS3|TSKU|COL1A1|KCNQ1|IL12B|ADRB3|ACHE|ARRB2|CD28|SOX13|ANXA3|GATA6|YAP1|ABCA1|ETS1|PRKCA|DAB2|STAT6|CSF1R|SMAD3|ELANE|TICAM1|ZFP36L1|TWF2|NPR1|GLIPR2|SERPINF1|WT1|NPY2R|BMP2|POLR3K|NLGN2|PANX1|LGR4|GATA3|ERBB3|CD38|ANO6|NFKBID|PRPF19|PYCARD|ERBB4|BMPR1A|INHA|H…	175	1.31436e-09
regulation of anatomical structure morphogenesis (GO:0022603)	biological_process	P1	SEMA6A|EPHB2|DDAH1|RHOC|CCBE1|MOV10|MSN|DLL1|ROBO1|ZNRF3|HSPB1|ANKRD6|BMPR2|FZD2|NIBAN2|SEMA4C|FGR|TWIST1|FOXJ2|YWHAH|PFN1|ARRB2|ANXA3|GATA6|ETS1|PRKCA|RDX|DAB2|SEMA6B|CSF1R|LIMS2|FZD1|EMP2|APOA1|NEDD9|NTNG1|TWF2|NPR1|FAM171A1|SERPINF1|WT1|SH3KBP1|BMP2|DOCK1|CDC42EP4|LRRC4C|LGR4|EPHA2|GATA3|ADAMTS9|SYT1|TNFSF13B|BMPR1A|RAC2|POSTN|RASAL1|PDPN|F11R|MED12|PPP3CA|TACSTD2|ERBB2|EGLN1|PLXNA1|BCL9L|OBSL…	135	1.43195e-09
response to cytokine (GO:0034097)	biological_process	P1	NDN|GGT1|SIRPA|CASP4|CCR1|IFITM2|TRIM21|PTPN14|MMP2|IRF2|IFI6|MSN|CCDC3|GSN|GSDME|PTPN5|IRS1|ROBO1|PTPRZ1|TWIST1|RPS3|COL1A1|IFI35|IL12B|RAB20|DTX1|TRIM56|ACSL4|ZYX|RNASEL|YAP1|PLSCR1|ETS1|PRKCA|ZFP36L2|COL3A1|IL10RB|STAT6|CSF1R|NLRC5|RELB|SMAD3|ARID5B|SPOCK2|OAS1|APOA1|IL1RAPL2|IFNE|ZFP36L1|TDGF1|PARP14|CNTFR|MSC|CDC42EP4|TXNDC17|USP18|GATA3|CD38|IFIT3|TNFSF13B|DPYSL3|ADAMTS7|TNFRSF12A|PYCARD|RN…	153	1.57285e-09
cellular response to cytokine stimulus (GO:0071345)	biological_process	P1	NDN|SIRPA|CASP4|CCR1|IFITM2|TRIM21|PTPN14|MMP2|IRF2|IFI6|MSN|CCDC3|GSN|GSDME|PTPN5|IRS1|ROBO1|PTPRZ1|TWIST1|RPS3|COL1A1|IFI35|IL12B|RAB20|DTX1|ZYX|RNASEL|YAP1|ZFP36L2|IL10RB|STAT6|CSF1R|NLRC5|SMAD3|ARID5B|SPOCK2|OAS1|APOA1|IL1RAPL2|IFNE|ZFP36L1|TDGF1|PARP14|CNTFR|MSC|CDC42EP4|TXNDC17|USP18|GATA3|IFIT3|TNFSF13B|DPYSL3|ADAMTS7|TNFRSF12A|PYCARD|RNF113A|MRAS|IFI16|POSTN|PIK3R1|SHPK|SMAD7|NOS2|BCL2|NE…	129	1.14862e-05
cytokine-mediated signaling pathway (GO:0019221)	biological_process	P1	NDN|CASP4|CCR1|IFITM2|TRIM21|MMP2|IRF2|IFI6|MSN|CCDC3|IRS1|ROBO1|PTPRZ1|TWIST1|IFI35|IL12B|RNASEL|YAP1|IL10RB|STAT6|CSF1R|NLRC5|OAS1|APOA1|IL1RAPL2|IFNE|PARP14|CNTFR|TXNDC17|USP18|GATA3|IFIT3|TNFSF13B|TNFRSF12A|PYCARD|RNF113A|PIK3R1|NOS2|BCL2|IFNAR1|SOCS3|FYN|IFITM3|FLT3|VEGFA|FSCN1|OAS3|GSTO1|GAS6|AXL|PPIA|IL6R|AIP|MIR99A|CAMK2B|CISH|CXCR4|B2M|IRAK2|GBP2|IFIT2|APPL1|CASP1|ACTN4|IL11RA|GAB2|CTF1|…	86	0.00871794
response to endogenous stimulus (GO:0009719)	biological_process	P1	CDH1|HTRA3|CASP4|WFIKKN2|GNG2|ZBED3|RGS4|ZFHX3|AMHR2|MMP2|FGFBP3|TCF21|PMEPA1|COL5A2|COL4A1|IRS1|GNRHR|TFAP4|INSRR|BMPR2|IGF1R|ACTB|BCAR3|COL1A1|FAT4|YWHAH|KCNQ1|TRIB3|INSR|AMH|DSTYK|MXRA5|ARRB2|ENHO|KLF3|ANXA3|GATA6|ZYX|YAP1|ABCA1|HNRNPA1|SMAD5|LRP5|GNB5|NUCKS1|ZFP36L2|COL3A1|RDX|DAB2|STAT6|CHST11|SMAD3|PLOD3|APOA1|PCSK6|PTPRE|NCOA2|TICAM1|ZFP36L1|TDGF1|SERPINF1|WT1|BMP2|ITGB5|USP9Y|PRKAR2B|LPIN…	196	2.50927e-09
cellular response to endogenous stimulus (GO:0071495)	biological_process	P1	CDH1|HTRA3|CASP4|WFIKKN2|GNG2|RGS4|AMHR2|MMP2|FGFBP3|TCF21|PMEPA1|COL5A2|COL4A1|IRS1|GNRHR|TFAP4|INSRR|BMPR2|IGF1R|ACTB|BCAR3|COL1A1|FAT4|YWHAH|KCNQ1|TRIB3|INSR|AMH|DSTYK|ARRB2|ENHO|KLF3|GATA6|ZYX|YAP1|HNRNPA1|SMAD5|GNB5|NUCKS1|ZFP36L2|COL3A1|RDX|DAB2|STAT6|CHST11|SMAD3|PLOD3|PCSK6|PTPRE|NCOA2|ZFP36L1|TDGF1|SERPINF1|WT1|BMP2|ITGB5|USP9Y|PRKAR2B|LPIN3|MGARP|LGR4|SH3BP4|GATA3|ANOS1|ADAMTS7|RPL8|ERB…	161	1.45688e-06
cell development (GO:0048468)	biological_process	P1	NDN|SEMA6A|CDH1|EPHB2|BLOC1S1|WFIKKN2|NAGLU|SOX4|RGS4|DPYSL2|MOV10|TNN|MSN|GSN|RAB17|DLL1|ROBO1|ZSWIM5|EFNA2|BMPR2|FZD2|NIBAN2|PCARE|SEMA4C|GLI2|PTPRZ1|TWIST1|ACTB|DCLK1|COL27A1|MAML1|TSKU|C1GALT1C1|FAT4|YWHAH|PYGO2|LGALS1|AMH|ACHE|LSR|ACSL4|YAP1|SMAD5|LRP5|DEAF1|PRKCA|NEGR1|ALPK3|RDX|SEMA6B|NRCAM|SERPINH1|BLOC1S5|CSF1R|LIMS2|CHST11|FZD1|PHGDH|SMAD3|ARID5B|PLOD3|APOA1|NEDD9|NTNG1|LAMA2|TWF2|GRB7|…	234	3.81801e-09
regulation of biological quality (GO:0065008)	biological_process	P1	NDN|SEMA6A|ILDR2|BMF|CCDC22|ZNF219|EPHB2|DDAH1|ARHGAP22|CCR1|LCA5|PLCL2|GNG2|ZBED3|SOX4|WWTR1|KCNJ5|RGS4|TRIM21|RHOC|IRF2|IFI6|FGFBP3|ATP10D|SLC22A17|DPYSL2|MOV10|MSN|GSN|PPIB|ADAMTS5|RAB17|IRS1|DLL1|SCN9A|ABHD6|SCD|PPP1CA|ATP8A1|HSPB1|BMPR2|IGF1R|NIBAN2|SEMA4C|SLC22A9|FGR|TRPC3|ACTB|SLC25A4|ATP1B1|TSKU|YWHAB|ACSM3|C1GALT1C1|COL1A1|MYL12A|ALDH5A1|YWHAH|KCNQ1|PPIF|ADRB3|SLC4A2|PLCB3|INSR|TLN1|CSDC…	404	4.02707e-09
positive regulation of macromolecule metabolic process (GO:0010604)	biological_process	P1	NDN|CDH1|CCDC22|ZNF219|VGLL4|EPHB2|WNT6|PATZ1|OSBPL7|ZBED3|H1-0|SOX4|WWTR1|ZFHX3|TRIM21|IRF2|TCF21|CCBE1|UBTF|MOV10|CREB3L4|MSN|GSN|H1-10|IRS1|TFAP4|UBQLN2|DLL1|CD200|ZC3HAV1|TRIB2|ROBO1|ZNF493|CDKN1B|HSPB1|BMPR2|FZD2|NIBAN2|CD63|GLI2|DPF3|CHD6|FGR|TWIST1|RPS3|ACTB|BCAR3|TET1|MAML3|NFIC|MAML1|NFIA|FOXJ2|HAS3|COL1A1|YWHAH|NKX6-3|AJUBA|IL12B|TRIB3|INSR|AMH|TFEB|ARRB2|CD28|DTX1|NAT14|ANXA3|TRIM56|SL…	345	1.69427e-07
positive regulation of metabolic process (GO:0009893)	biological_process	P1	NDN|CDH1|CCDC22|ZNF219|VGLL4|EPHB2|WNT6|DDAH1|PATZ1|OSBPL7|ZBED3|H1-0|SOX4|WWTR1|APOC1|ZFHX3|TRIM21|IRF2|TCF21|CCBE1|UBTF|MOV10|CREB3L4|MSN|CCDC3|GSN|H1-10|IRS1|TFAP4|UBQLN2|DLL1|CD200|ZC3HAV1|TRIB2|INSRR|ROBO1|ZNF493|ABHD6|CDKN1B|SCD|HSPB1|BMPR2|FZD2|IGF1R|NIBAN2|CD63|OPN3|GLI2|DPF3|CHD6|FGR|TWIST1|RPS3|ACTB|BCAR3|TET1|MAML3|NFIC|MAML1|NFIA|FOXJ2|HAS3|COL1A1|YWHAH|NKX6-3|AJUBA|IL12B|TRIB3|ADRB3|…	378	5.71981e-09
positive regulation of cellular metabolic process (GO:0031325)	biological_process	P1	NDN|CDH1|CCDC22|ZNF219|VGLL4|EPHB2|WNT6|DDAH1|PATZ1|OSBPL7|ZBED3|H1-0|SOX4|WWTR1|APOC1|ZFHX3|TRIM21|IRF2|TCF21|CCBE1|UBTF|MOV10|CREB3L4|MSN|GSN|H1-10|IRS1|TFAP4|UBQLN2|DLL1|ZC3HAV1|TRIB2|INSRR|ROBO1|ZNF493|BMPR2|FZD2|IGF1R|NIBAN2|CD63|OPN3|GLI2|DPF3|CHD6|FGR|TWIST1|RPS3|BCAR3|TET1|MAML3|NFIC|MAML1|NFIA|FOXJ2|HAS3|COL1A1|YWHAH|NKX6-3|AJUBA|IL12B|TRIB3|INSR|TFEB|DSTYK|ARRB2|CD28|DTX1|NAT14|ANXA3|TR…	335	8.51111e-09
positive regulation of nitrogen compound metabolic process (GO:0051173)	biological_process	P1	NDN|CDH1|CCDC22|ZNF219|VGLL4|WNT6|DDAH1|PATZ1|OSBPL7|ZBED3|H1-0|SOX4|WWTR1|ZFHX3|TRIM21|IRF2|TCF21|CCBE1|UBTF|MOV10|CREB3L4|MSN|GSN|H1-10|TFAP4|UBQLN2|DLL1|ZC3HAV1|TRIB2|ROBO1|ZNF493|CDKN1B|BMPR2|FZD2|NIBAN2|GLI2|DPF3|CHD6|TWIST1|RPS3|BCAR3|TET1|MAML3|NFIC|MAML1|NFIA|FOXJ2|HAS3|COL1A1|YWHAH|NKX6-3|AJUBA|IL12B|TRIB3|INSR|TFEB|ARRB2|CD28|DTX1|NAT14|ANXA3|TRIM56|SLC38A2|USP22|NAP1L2|CAMKK2|GATA6|RNA…	308	8.15608e-07
growth (GO:0040007)	biological_process	P1	NDN|SEMA6A|VGLL4|WWTR1|RGS4|DPYSL2|TNN|GSN|PPIB|DLL1|NINJ2|IGFBP4|CDKN1B|BMPR2|SEMA4C|GLI2|DCLK1|COL27A1|TSKU|PYGO2|INSR|AMH|PPP2R1A|GATA6|YAP1|FBP1|SEMA6B|NRCAM|CHST11|SMAD3|ARID5B|NEDD9|ZFP36L1|TWF2|NPR1|WT1|NINJ1|SH3BP4|GATA3|CD38|SYT1|PRPF19|ERBB4|BMPR1A|CCDC85B|LLPH|APOE|RAI1|POSTN|ZMIZ1|RBBP7|RASAL1|ZFPM2|NOTCH2|SMAD7|BCL2|MED12|PPP3CA|SLITRK6|FAM107A|ERBB2|PLXNA1|FTO|SOCS3|DDR1|CDK5|PLCE1|…	122	4.49404e-08
regulation of growth (GO:0040008)	biological_process	P1	NDN|SEMA6A|VGLL4|RGS4|DPYSL2|PPIB|DLL1|IGFBP4|CDKN1B|BMPR2|SEMA4C|INSR|PPP2R1A|GATA6|YAP1|FBP1|SEMA6B|NRCAM|SMAD3|NEDD9|TWF2|NPR1|WT1|SH3BP4|CD38|SYT1|ERBB4|BMPR1A|CCDC85B|APOE|RAI1|RBBP7|RASAL1|ZFPM2|NOTCH2|SMAD7|BCL2|FAM107A|ERBB2|FTO|SOCS3|DDR1|CDK5|PLCE1|VEGFA|MEF2C|SIPA1|DCBLD2|MMP14|ENO1|CDK4|MEG3|GAS6|SYT2|TBX2|MAG|TGFBR2|PTCH2|ESR2|CISH|EPHA7|CPNE5|N6AMT1|CXCR4|HEY2|SEMA7A|TP53|CXCL12|WFD…	78	0.00113212
developmental growth (GO:0048589)	biological_process	P1	NDN|SEMA6A|VGLL4|WWTR1|RGS4|DPYSL2|TNN|GSN|PPIB|DLL1|NINJ2|CDKN1B|BMPR2|SEMA4C|GLI2|DCLK1|COL27A1|TSKU|PYGO2|INSR|GATA6|YAP1|SEMA6B|NRCAM|CHST11|SMAD3|ARID5B|ZFP36L1|TWF2|WT1|NINJ1|GATA3|SYT1|PRPF19|ERBB4|BMPR1A|LLPH|APOE|RAI1|POSTN|ZMIZ1|RASAL1|ZFPM2|NOTCH2|SMAD7|BCL2|MED12|PPP3CA|SLITRK6|PLXNA1|FTO|DDR1|CDK5|SOX10|VEGFA|CD9|VCL|SOX9|MEF2C|CPQ|CDK4|SYT2|TBX2|MAG|TGFBR2|PTGFRN|PPP1R13L|EPHA7|CPNE…	93	8.06454e-09
cell growth (GO:0016049)	biological_process	P1	NDN|SEMA6A|VGLL4|RGS4|DPYSL2|TNN|IGFBP4|CDKN1B|BMPR2|SEMA4C|DCLK1|PPP2R1A|FBP1|SEMA6B|NRCAM|SMAD3|TWF2|NPR1|WT1|SH3BP4|CD38|SYT1|CCDC85B|LLPH|APOE|POSTN|RBBP7|RASAL1|SMAD7|BCL2|FAM107A|ERBB2|PLXNA1|DDR1|CDK5|PLCE1|VEGFA|VCL|SOX9|SIPA1|DCBLD2|MMP14|ENO1|MEG3|SYT2|MAG|TGFBR2|PTCH2|ESR2|CISH|EPHA7|CPNE5|N6AMT1|CXCR4|FLRT1|PRMT2|LAMB2|SEMA7A|GATA4|TP53|CXCL12|WFDC1|OLFM1|SEMA4B|CLSTN3|LRP1|IQGAP1|CLS…	69	7.00284e-06
regulation of cell growth (GO:0001558)	biological_process	P1	SEMA6A|VGLL4|RGS4|DPYSL2|IGFBP4|CDKN1B|BMPR2|SEMA4C|PPP2R1A|FBP1|SEMA6B|NRCAM|SMAD3|TWF2|NPR1|WT1|SH3BP4|CD38|SYT1|CCDC85B|APOE|RBBP7|RASAL1|SMAD7|BCL2|FAM107A|ERBB2|DDR1|CDK5|PLCE1|VEGFA|SIPA1|DCBLD2|MMP14|ENO1|MEG3|SYT2|MAG|PTCH2|ESR2|CISH|EPHA7|CPNE5|N6AMT1|CXCR4|SEMA7A|TP53|CXCL12|WFDC1|OLFM1|SEMA4B|CLSTN3|LRP1|CLSTN1	54	0.00145118
negative regulation of developmental process (GO:0051093)	biological_process	P1	SEMA6A|VGLL4|EPHB2|CCR1|WWTR1|RGS4|TNN|COL5A2|DLL1|TRIB2|CDKN1B|TMEM176B|NIBAN2|SEMA4C|GLI2|TWIST1|TSKU|FOXJ2|YWHAH|NKX6-3|TRIB3|AMH|DTX1|YAP1|ABCA1|ZNF536|LRP5|ZFP36L2|SEMA6B|TMEM176A|SMAD3|ZFP36L1|TCF23|NPR1|ITGAV|SERPINF1|WT1|BMP2|KLF7|CDK6|EPHA2|GATA3|ADAMTS9|ADAMTS7|BMPR1A|CCDC85B|INHA|DAND5|COL5A1|S1PR3|RAI1|POSTN|TRIO|EDNRB|LOXL2|ZFPM2|C1QC|PIK3R1|SMAD7|BCL2|PPP3CA|ABCG1|KLF13|TACSTD2|ERBB…	123	9.95575e-09
negative regulation of cell differentiation (GO:0045596)	biological_process	P1	SEMA6A|EPHB2|WWTR1|RGS4|TNN|COL5A2|DLL1|TRIB2|TMEM176B|SEMA4C|GLI2|TWIST1|TSKU|FOXJ2|YWHAH|NKX6-3|TRIB3|DTX1|YAP1|ABCA1|ZNF536|LRP5|ZFP36L2|SEMA6B|TMEM176A|SMAD3|ZFP36L1|TCF23|ITGAV|BMP2|CDK6|GATA3|ADAMTS7|BMPR1A|CCDC85B|INHA|COL5A1|S1PR3|POSTN|TRIO|EDNRB|ZFPM2|C1QC|PIK3R1|SMAD7|PPP3CA|ABCG1|KLF13|TACSTD2|ERBB2|CITED1|RUNX1T1|CRIM1|CDK5|SOX10|ZHX2|LDLR|VEGFA|ID3|SOX9|PRDX2|GDF3|HES1|MAG|EPHA7|NFE…	86	1.73244e-05
regulation of cellular component organization (GO:0051128)	biological_process	P1	SEMA6A|BMF|VGLL4|EPHB2|ARHGAP22|H1-0|APOC1|RGS4|RHOC|PMEPA1|DPYSL2|MOV10|MSN|GSN|H1-10|RAB17|PLEK2|UBQLN2|DLL1|ROBO1|IGFBP4|CDKN1B|ATP8A1|BMPR2|IGF1R|SEMA4C|CD63|TWIST1|EID1|RPS3|TET1|TSKU|YWHAB|HAS3|YWHAH|AJUBA|PYGO2|PPIF|COLGALT1|INSR|LGALS1|PFN1|ARRB2|CD28|PPP2R1A|NAP1L2|CAMKK2|YAP1|FBP1|ABCA1|ETS1|HNRNPA1|LRP5|NEGR1|RDX|DAB2|SEMA6B|NRCAM|TUBA1A|LIMA1|CSF1R|RAB33B|FZD1|SMAD3|APOA1|IL1RAPL2|LIM…	259	1.08291e-08
localization (GO:0051179)	biological_process	P1	NDN|SEMA6A|CAPN1|ILDR2|CDH1|BMF|CCDC22|EPHB2|ATP5MC2|PATZ1|OSBPL7|PKIA|BLOC1S1|SIRPA|TVP23A|CCR1|LCA5|CLTB|CNPY4|ZBED3|SAMD9|KLRK1|SOX4|WWTR1|APOC1|RPS4Y1|KCNJ5|RGS4|UBL4A|SLC43A3|TRIM21|PTPN14|TBC1D9|RHOC|RPS3A|ATP10D|SLC22A17|CCBE1|DPYSL2|TNN|MVP|MSN|GSN|PPIB|RAB17|FAT1|IRS1|UBQLN2|DLL1|RPL39|CKAP4|PGAM1|PLA2G7|CD200|SCN9A|ECH1|ROBO1|LY75|ZSWIM5|ABHD6|FRMPD1|CBLIF|ATP8A1|HSPB1|IMPDH2|BMPR2|IGF1…	622	1.36158e-08
cellular response to stimulus (GO:0051716)	biological_process	P1	NDN|ADGRD2|SEMA6A|CAPN1|CDH1|BMF|CCDC22|ZNF219|VGLL4|EPHB2|WNT6|DDAH1|ARHGAP22|GGT1|OSBPL7|SIRPA|HTRA3|FLNB|CASP4|CCR1|WFIKKN2|PLCL2|GNG2|ZBED3|IFITM2|KLRK1|SOX4|WWTR1|RGS4|TRIM21|PTPN14|AMHR2|MMP2|PHF24|RHOC|RASSF6|IRF2|IFI6|FGFBP3|TCF21|CCBE1|PMEPA1|DPYSL2|MOV10|TNN|MVP|CREB3L4|MSN|CCDC3|GSN|GSDME|PPIB|EXTL2|COL5A2|COL4A1|NPTXR|PLEK2|PTPN5|IRS1|GNRHR|TFAP4|DTX4|UBQLN2|CYP2A6|THEMIS2|DLL1|PLA2G7…	687	1.87612e-08
regulation of molecular function (GO:0065009)	biological_process	P1	NDN|CAPN1|CCDC22|EPHB2|DDAH1|ARHGAP22|PKIA|SIRPA|WFIKKN2|PLCL2|H1-0|KLRK1|WWTR1|APOC1|RGS4|TRIM21|TBC1D9|RHOC|IFI6|MVP|GSN|NPTXR|IRS1|TFAP4|CD200|TRIB2|INSRR|ROBO1|CDKN1B|PPP1CA|ARHGEF3|HSPB1|FZD2|IGF1R|NIBAN2|FGR|TWIST1|RPS3|ACTB|BCAR3|LRRC38|SERPINB8|ATP1B1|YWHAB|YWHAH|PPP1R26|AJUBA|PYGO2|IL12B|TRIB3|PPIF|ADRB3|INSR|LY6E|AMH|DSTYK|PFN1|ARRB2|ENHO|SIK1|ANXA3|PPP2R1A|CAMKK2|ARAP2|PLSCR1|SH3PXD2A|…	325	2.56581e-08
animal organ morphogenesis (GO:0009887)	biological_process	P1	FAM20C|SEMA6A|CAPN1|EPHB2|WNT6|NAGLU|SOX4|WWTR1|MMP2|TCF21|MSN|ADAMTS5|COL5A2|DLL1|ROBO1|ZNRF3|TMEM176B|ANKRD6|BMPR2|FZD2|GLI2|FGR|TWIST1|BCAR3|COL27A1|TSKU|COL1A1|FAT4|INSR|PFN1|ARRB2|GATA6|YAP1|LRP5|DAB2|SERPINH1|CSF1R|LIMS2|RAB33B|CHST11|FZD1|ZFAND5|SMAD3|ARID5B|PLOD3|SLC39A1|NTNG1|LAMA2|WT1|NPY2R|BMP2|TNNI3|AQP3|MTHFD1|HOXD4|LGR4|EPHA2|GATA3|BMPR1A|COL5A1|DHRS3|TLE2|ZMIZ1|ZFPM2|NOTCH2|SMAD7|B…	134	3.62535e-08
animal organ development (GO:0048513)	biological_process	P1	FAM20C|SEMA6A|CAPN1|ILDR2|CDH1|ZNF219|VGLL4|EPHB2|WNT6|PATZ1|FLNB|CCR1|PLCL2|STOX2|NAGLU|SOX4|WWTR1|RGS4|ZFHX3|AMHR2|MMP2|TCF21|CCBE1|DPYSL2|MOV10|MSN|GSDME|PPIB|ADAMTS5|COL5A2|COL4A1|DLL1|MR1|ROBO1|ZNRF3|CDKN1B|TMEM176B|PPP1CA|EFNA2|ANKRD6|BMPR2|FZD2|NIBAN2|SEMA4C|OPN3|GLI2|FGR|TWIST1|ACTB|BCAR3|DCLK1|COL27A1|MAML1|TSKU|NFIA|COL1A1|FAT4|YWHAH|KCNQ1|LRP10|PYGO2|IL12B|INSR|MYL6|LGALS1|AMH|TFEB|ACH…	353	1.69427e-07
biological process involved in interspecies interaction between organisms (GO:0044419)	biological_process	P1	CDH1|GGT1|C6|SIRPA|CASP4|ATF7|IFITM2|KLRK1|RPS4Y1|TRIM21|IRF2|RPS3A|IFI6|MOV10|MSN|GSN|GSDME|PPIB|ADAMTS5|IFI44|TFAP4|RPL39|MR1|ZC3HAV1|PPP1CA|VSIG4|HSPB1|IGF1R|CHD6|FGR|RPS3|SLC25A4|DCLK1|YWHAB|NFIA|NONO|RPL29|IFI35|TSPAN7|IL12B|INSR|LY6E|TLN1|LGALS1|KDM4A|RPS16|ARRB2|RAB20|CD28|ANXA3|MVB12A|TRIM56|GATA6|ZYX|RNASEL|PLSCR1|HNRNPA1|PRKCA|NUCKS1|RPL35|IL10RB|CSF1R|RAB6A|NLRC5|RELB|SMAD3|OAS1|ELANE|…	240	2.84515e-07
regulation of multicellular organismal development (GO:2000026)	biological_process	P1	SEMA6A|ZNF219|VGLL4|EPHB2|WNT6|DDAH1|CCR1|ZBED3|SOX4|WWTR1|RGS4|CCBE1|MOV10|DLL1|ROBO1|TMEM176B|HSPB1|BMPR2|NIBAN2|SEMA4C|GLI2|PTPRZ1|TWIST1|FOXJ2|FAT4|YWHAH|NKX6-3|IL12B|INSR|CD28|DTX1|SOX13|ANXA3|GATA6|YAP1|ETS1|PRKCA|ZFP36L2|SEMA6B|TMEM176A|SMAD3|EMP2|LAMA2|ZFP36L1|TWF2|NPR1|SERPINF1|WT1|BMP2|AQP3|KLF7|NLGN2|CDK6|EPHA2|GATA3|ADAMTS9|ANO6|ADAMTS7|GP1BA|NFKBID|PRPF19|ERBB4|BMPR1A|INHA|S1PR3|ZMIZ…	161	5.83944e-07
tissue development (GO:0009888)	biological_process	P1	FAM20C|SEMA6A|CAPN1|ZNF219|VGLL4|WNT6|CCR1|SOX4|WWTR1|RGS4|MMP2|RHOC|TCF21|MSN|GSN|COL5A2|COL4A1|DLL1|NINJ2|ROBO1|ZNRF3|CDKN1B|PPP1CA|ANKRD6|BMPR2|FZD2|NIBAN2|SEMA4C|OPN3|GLI2|FGR|TWIST1|ACTB|COL27A1|MAML1|TSKU|FOXJ2|COL1A1|FAT4|NKX6-3|AJUBA|PYGO2|MYL6|AMH|PFN1|ARRB2|SIK1|GATA6|YAP1|SMAD5|LRP5|DEAF1|ALPK3|RDX|DAB2|SEMA6B|SERPINH1|CSF1R|CHST11|FZD1|ZFAND5|PHGDH|SMAD3|ARID5B|PLOD3|PCSK6|GSTA1|VDAC1…	221	6.46973e-07
regulation of cellular process (GO:0050794)	biological_process	P1	NDN|ADGRD2|SEMA6A|CAPN1|CDH1|BMF|CCDC22|ZNF219|VGLL4|EPHB2|WNT6|DDAH1|PATZ1|ARHGAP22|OSBPL7|ZNF347|PKIA|SIRPA|HTRA3|FLNB|CASP4|CCR1|ATF7|WFIKKN2|PLCL2|ZNF835|CNPY4|MTMR8|GNG2|ZBED3|IFITM2|H1-0|STOX2|KLRK1|SOX4|PHF6|WWTR1|APOC1|KCNJ5|RGS4|ZFHX3|TRIM21|PTPN14|AMHR2|MMP2|PHF24|RHOC|RASSF6|IRF2|RPS3A|IFI6|FGFBP3|TCF21|CCBE1|PMEPA1|DPYSL2|UBTF|MOV10|TNN|MVP|CREB3L4|MSN|CCDC3|GSN|GSDME|EXTL2|COL5A2|H1-…	947	6.94847e-07
negative regulation of metabolic process (GO:0009892)	biological_process	P1	NDN|LSM7|BMF|ZNF219|VGLL4|EPHB2|PATZ1|PKIA|SIRPA|CCR1|WFIKKN2|PLCL2|MTMR8|ZBED3|H1-0|SOX4|PHF6|WWTR1|APOC1|RPS4Y1|RGS4|ZFHX3|TRIM21|IRF2|RPS3A|IFI6|TCF21|PMEPA1|MOV10|MVP|CCDC3|ADAMTS5|H1-10|THAP11|TFAP4|UBQLN2|DLL1|RPL39|CD200|ZC3HAV1|TRIB2|ROBO1|TSC22D4|ABHD6|CDKN1B|VSIG4|HSPB1|BMPR2|IGF1R|NIBAN2|OPN3|GLI2|DPF3|TWIST1|EID1|CXXC5|RPS3|SERPINB8|TET1|NFIC|TSKU|YWHAB|NONO|KCNQ1|PPP1R26|NKX6-3|RPL29…	354	7.779e-07
negative regulation of macromolecule metabolic process (GO:0010605)	biological_process	P1	NDN|LSM7|ZNF219|VGLL4|EPHB2|PATZ1|PKIA|SIRPA|CCR1|WFIKKN2|ZBED3|H1-0|SOX4|PHF6|WWTR1|RPS4Y1|RGS4|ZFHX3|TRIM21|IRF2|RPS3A|IFI6|TCF21|PMEPA1|MOV10|MVP|CCDC3|H1-10|THAP11|TFAP4|UBQLN2|DLL1|RPL39|CD200|ZC3HAV1|TRIB2|ROBO1|TSC22D4|CDKN1B|VSIG4|HSPB1|BMPR2|IGF1R|NIBAN2|GLI2|DPF3|TWIST1|EID1|CXXC5|RPS3|SERPINB8|TET1|NFIC|TSKU|YWHAB|NONO|KCNQ1|PPP1R26|NKX6-3|RPL29|AJUBA|IL12B|TRIB3|CSDC2|KDM4A|RPS16|ARRB…	324	2.53564e-05
biosynthetic process (GO:0009058)	biological_process	P1	NDN|EEF1A1P5|CDH1|CCDC22|ZNF219|VGLL4|WNT6|ATP5MC2|DDAH1|PATZ1|GGT1|OSBPL7|ZNF347|PKIA|SIRPA|ST6GALNAC1|ATF7|ZNF835|MTMR8|ZBED3|H1-0|STOX2|SOX4|PHF6|WWTR1|APOC1|KDSR|RPS4Y1|ZFHX3|TRIM21|PTPN14|B4GAT1|IRF2|RPS3A|TCF21|UBTF|PAPSS1|MOV10|CREB3L4|CCDC3|CHPF|EXTL2|H1-10|THAP11|IRS1|GALNT18|TFAP4|DLL1|FBXL19|RPL39|PGAM1|CD200|ZNF493|TSC22D4|ABHD6|CDKN1B|GALNT16|SCD|PPP1CA|HSPB1|IMPDH2|BMPR2|FZD2|DGAT2L…	564	8.1447e-07
organic substance biosynthetic process (GO:1901576)	biological_process	P1	NDN|EEF1A1P5|CDH1|CCDC22|ZNF219|VGLL4|WNT6|ATP5MC2|PATZ1|GGT1|OSBPL7|ZNF347|PKIA|ST6GALNAC1|ATF7|ZNF835|MTMR8|ZBED3|H1-0|STOX2|SOX4|PHF6|WWTR1|APOC1|KDSR|RPS4Y1|ZFHX3|TRIM21|PTPN14|B4GAT1|IRF2|RPS3A|TCF21|UBTF|PAPSS1|MOV10|CREB3L4|CCDC3|CHPF|EXTL2|H1-10|THAP11|IRS1|GALNT18|TFAP4|DLL1|FBXL19|RPL39|PGAM1|CD200|ZNF493|TSC22D4|ABHD6|CDKN1B|GALNT16|SCD|PPP1CA|HSPB1|IMPDH2|BMPR2|FZD2|DGAT2L6|NIBAN2|OPN…	556	1.2491e-06
cellular biosynthetic process (GO:0044249)	biological_process	P1	NDN|EEF1A1P5|CDH1|CCDC22|ZNF219|VGLL4|WNT6|ATP5MC2|DDAH1|PATZ1|GGT1|OSBPL7|ZNF347|PKIA|SIRPA|ST6GALNAC1|ATF7|ZNF835|MTMR8|ZBED3|H1-0|STOX2|SOX4|PHF6|WWTR1|APOC1|KDSR|RPS4Y1|ZFHX3|TRIM21|PTPN14|B4GAT1|IRF2|RPS3A|TCF21|UBTF|PAPSS1|MOV10|CREB3L4|CHPF|EXTL2|H1-10|THAP11|IRS1|GALNT18|TFAP4|DLL1|FBXL19|RPL39|CD200|ZNF493|TSC22D4|CDKN1B|GALNT16|SCD|PPP1CA|HSPB1|IMPDH2|BMPR2|FZD2|DGAT2L6|NIBAN2|OPN3|GLI2…	546	2.38616e-06
response to stimulus (GO:0050896)	biological_process	P1	NDN|ADGRD2|SEMA6A|CAPN1|ILDR2|CDH1|BMF|CCDC22|ZNF219|VGLL4|EPHB2|WNT6|DDAH1|ARHGAP22|GGT1|OSBPL7|C6|SIRPA|HTRA3|FLNB|CASP4|CCR1|WFIKKN2|PLCL2|GNG2|ZBED3|IFITM2|KLRK1|SOX4|WWTR1|RGS4|ZFHX3|TRIM21|PTPN14|AMHR2|MMP2|PHF24|RHOC|RASSF6|IRF2|IFI6|FGFBP3|TCF21|CCBE1|PMEPA1|DPYSL2|MOV10|TNN|MVP|CREB3L4|MSN|CCDC3|GSN|GSDME|PPIB|EXTL2|ADAMTS5|COL5A2|RAB17|COL4A1|NPTXR|IFI44|PLEK2|S100A16|PTPN5|IRS1|GNRHR|T…	797	8.92074e-07
negative regulation of multicellular organismal process (GO:0051241)	biological_process	P1	SEMA6A|VGLL4|EPHB2|PATZ1|SIRPA|CCR1|PLCL2|APOC1|RGS4|ADAMTS5|DLL1|CD200|TRIB2|ROBO1|ABHD6|TMEM176B|VSIG4|BMPR2|NIBAN2|SEMA4C|GLI2|TWIST1|TSKU|FOXJ2|YWHAH|IL12B|ARRB2|DTX1|GATA6|SEMA6B|NLRC5|RELB|TMEM176A|SMAD3|APOA1|ELANE|NPR1|SERPINF1|WT1|NPY2R|BMP2|KLF7|CDK6|LGR4|EPHA2|GATA3|CD38|ADAMTS9|ADAMTS7|GP1BA|PYCARD|BMPR1A|INHA|DAND5|PRNP|APOE|RAI1|LOXL2|ZFPM2|C1QC|PIK3R1|SMAD7|BCL2|PPP3CA|NAV3|SERPINB…	133	9.47524e-07
multicellular organismal process (GO:0032501)	biological_process	P1	NDN|FAM20C|SEMA6A|CAPN1|ILDR2|CDH1|ZNF219|VGLL4|EPHB2|WNT6|HAPLN1|DDAH1|PATZ1|ARHGAP22|GGT1|C6|BLOC1S1|SIRPA|FLNB|CCR1|LCA5|WFIKKN2|PLCL2|GNG2|ZBED3|STOX2|NAGLU|SOX4|WWTR1|APOC1|RPS4Y1|KCNJ5|RGS4|ZFHX3|TRIM21|PTPN14|AMHR2|MMP2|PHF24|IRF2|NAV2|FGFBP3|ARSL|TCF21|CCBE1|DPYSL2|PAPSS1|MOV10|TNN|CREB3L4|MSN|GSN|GSDME|PPIB|ADAMTS5|COL5A2|RAB17|COL4A1|NPTXR|GNRHR|DTX4|DLL1|MR1|PLA2G7|CD200|NINJ2|SCN9A|TR…	689	1.1088e-06
protein metabolic process (GO:0019538)	biological_process	P1	NDN|EEF1A1P5|FAM20C|CAPN1|CDH1|CCDC22|VGLL4|EPHB2|MARCHF9|GGT1|OSBPL7|PKIA|BLOC1S1|SIRPA|HTRA3|CASP4|ST6GALNAC1|WFIKKN2|PLCL2|MTMR8|ZBED3|SOX4|WWTR1|APOC1|MMP23B|RPS4Y1|RGS4|UBL4A|TRIM21|PTPN14|COLGALT2|AMHR2|B4GAT1|MMP2|RPS3A|IFI6|CCBE1|PMEPA1|MOV10|MVP|MSN|GSN|RNF150|PPIB|CHPF|EXTL2|ADAMTS5|PTPN5|GALNT18|FKBP9|TFAP4|DTX4|UBQLN2|FBXL19|RPL39|CKAP4|TRIB2|INSRR|ROBO1|ZNRF3|IGFBP4|CDKN1B|GALNT16|PP…	520	1.14156e-06
cellular protein metabolic process (GO:0044267)	biological_process	P1	NDN|EEF1A1P5|FAM20C|CCDC22|VGLL4|EPHB2|MARCHF9|GGT1|OSBPL7|PKIA|BLOC1S1|SIRPA|ST6GALNAC1|WFIKKN2|PLCL2|MTMR8|ZBED3|SOX4|WWTR1|RPS4Y1|RGS4|UBL4A|TRIM21|PTPN14|COLGALT2|AMHR2|B4GAT1|MMP2|RPS3A|IFI6|CCBE1|PMEPA1|MOV10|MVP|MSN|GSN|RNF150|PPIB|EXTL2|PTPN5|GALNT18|FKBP9|TFAP4|DTX4|UBQLN2|FBXL19|RPL39|CKAP4|TRIB2|INSRR|ROBO1|ZNRF3|IGFBP4|CDKN1B|GALNT16|PPP1CA|HSPB1|NUAK2|BMPR2|IGF1R|OPN3|CTDSP1|PTPRZ1|F…	459	0.000101306
tissue morphogenesis (GO:0048729)	biological_process	P1	WNT6|SOX4|RHOC|TCF21|MSN|COL4A1|DLL1|ROBO1|ZNRF3|PPP1CA|ANKRD6|BMPR2|FZD2|SEMA4C|GLI2|TWIST1|ACTB|FAT4|AJUBA|PFN1|ARRB2|YAP1|LRP5|DEAF1|DAB2|CSF1R|FZD1|SMAD3|PLOD3|WT1|BMP2|TNNI3|OPHN1|MTHFD1|ITGA8|LGR4|EPHA2|GATA3|MTSS1|BMPR1A|COL5A1|ARHGAP24|ZFPM2|PDPN|NOTCH2|SMAD7|BCL2|MED12|TACSTD2|CITED1|PLXNA1|CAMSAP3|SOCS3|DDR1|ITGA2|SOX10|VEGFA|FERMT1|VCL|SOX9|MEF2C|MMP14|ALDH1A3|HES1|TBX2|TGFBR2|PDGFA|EP…	89	1.24955e-06
morphogenesis of an epithelium (GO:0002009)	biological_process	P1	WNT6|SOX4|RHOC|TCF21|MSN|COL4A1|DLL1|ZNRF3|PPP1CA|ANKRD6|FZD2|SEMA4C|GLI2|TWIST1|ACTB|FAT4|AJUBA|PFN1|ARRB2|YAP1|LRP5|DEAF1|DAB2|CSF1R|FZD1|SMAD3|PLOD3|WT1|BMP2|OPHN1|MTHFD1|LGR4|EPHA2|GATA3|MTSS1|COL5A1|ARHGAP24|PDPN|NOTCH2|BCL2|MED12|TACSTD2|CITED1|PLXNA1|CAMSAP3|SOCS3|DDR1|SOX10|VEGFA|FERMT1|VCL|SOX9|MEF2C|MMP14|ALDH1A3|HES1|TBX2|TGFBR2|PDGFA|EPHA7|CXCR4|SOX11|FGF10|NKX3-1|NTN4|GATA4|PSME1|JAG…	75	1.52302e-05
epithelium development (GO:0060429)	biological_process	P1	FAM20C|CAPN1|WNT6|SOX4|WWTR1|RHOC|TCF21|MSN|COL4A1|DLL1|ROBO1|ZNRF3|PPP1CA|ANKRD6|BMPR2|FZD2|SEMA4C|OPN3|GLI2|TWIST1|ACTB|FOXJ2|FAT4|NKX6-3|AJUBA|PYGO2|PFN1|ARRB2|GATA6|YAP1|SMAD5|LRP5|DEAF1|RDX|DAB2|CSF1R|FZD1|PHGDH|SMAD3|PLOD3|PCSK6|GSTA1|VDAC1|ZFP36L1|WT1|BMP2|OPHN1|AQP3|MTHFD1|KLF7|CDK6|LGR4|EPHA2|GATA3|ERBB4|MTSS1|BMPR1A|COL5A1|ARHGAP24|S1PR3|PDPN|NOTCH2|F11R|SMAD7|BCL2|MED12|SLITRK6|TACSTD2…	130	0.0073303
regulation of cell death (GO:0010941)	biological_process	P1	BMF|CASP4|SOX4|RASSF6|RPS3A|IFI6|GSN|GSDME|TFAP4|DLL1|CD200|CDKN1B|PPP1CA|ARHGEF3|HSPB1|NUAK2|IGF1R|NIBAN2|OPN3|GLI2|PTPRZ1|TWIST1|RPS3|SLC25A4|NONO|IL12B|PPIF|LGALS1|DSTYK|ARRB2|CD28|SIK1|ANP32A|GATA6|YAP1|LRP5|PRKCA|DAB2|CBX4|CSF1R|LIMS2|CHST11|SMAD3|VDAC1|HIP1|ZFP36L1|TDGF1|ITGAV|SERPINF1|WT1|BMP2|CNTFR|STEAP3|HRK|GATA3|ERBB3|ARAF|CD38|IFIT3|ANO6|TNFRSF12A|C1QA|RPL11|PYCARD|MTCH1|ARHGEF16|H19|…	173	0.000144543
apoptotic process (GO:0006915)	biological_process	P1	SEMA6A|BMF|CASP4|H1-0|SOX4|RASSF6|RPS3A|IFI6|GSN|GSDME|TFAP4|DLL1|PPP1CA|ARHGEF3|HSPB1|NUAK2|BMPR2|IGF1R|NIBAN2|OPN3|GLI2|PTPRZ1|TWIST1|RPS3|SLC25A4|YWHAB|NONO|YWHAH|IL12B|TRIB3|PPIF|LGALS1|DSTYK|ARRB2|CD28|PLEKHO2|SIK1|ANP32A|PPP2R1A|GATA6|YAP1|PLSCR1|LRP5|PRKCA|DAB2|XKR8|CBX4|CSF1R|LIMS2|CHST11|SMAD3|TICAM1|VDAC1|HIP1|PTPRH|ZFP36L1|TDGF1|C19orf12|ITGAV|WT1|SH3KBP1|BMP2|CNTFR|DOCK1|STEAP3|HRK|EP…	209	1.48195e-06
programmed cell death (GO:0012501)	biological_process	P1	SEMA6A|CAPN1|BMF|CASP4|H1-0|SOX4|RASSF6|RPS3A|IFI6|GSN|GSDME|TFAP4|DLL1|CDKN1B|PPP1CA|ARHGEF3|HSPB1|NUAK2|BMPR2|IGF1R|NIBAN2|OPN3|GLI2|PTPRZ1|TWIST1|RPS3|SLC25A4|YWHAB|NONO|YWHAH|IL12B|TRIB3|PPIF|LGALS1|DSTYK|ARRB2|CD28|PLEKHO2|SIK1|ANP32A|PPP2R1A|GATA6|YAP1|PLSCR1|LRP5|PRKCA|DAB2|XKR8|CBX4|CSF1R|LIMS2|CHST11|SMAD3|PCSK6|TICAM1|VDAC1|HIP1|PTPRH|ZFP36L1|TDGF1|C19orf12|ITGAV|WT1|SH3KBP1|BMP2|CNTFR|…	216	2.03532e-05
cell death (GO:0008219)	biological_process	P1	SEMA6A|CAPN1|BMF|CASP4|H1-0|SOX4|RASSF6|RPS3A|IFI6|GSN|GSDME|TFAP4|DLL1|CD200|CDKN1B|PPP1CA|ARHGEF3|HSPB1|NUAK2|BMPR2|IGF1R|NIBAN2|OPN3|GLI2|PTPRZ1|TWIST1|RPS3|SLC25A4|YWHAB|NONO|YWHAH|IL12B|TRIB3|PPIF|LGALS1|DSTYK|ARRB2|CD28|PLEKHO2|SIK1|ANP32A|PPP2R1A|GATA6|YAP1|PLSCR1|LRP5|PRKCA|DAB2|XKR8|CBX4|CSF1R|LIMS2|CHST11|SMAD3|EMP2|PCSK6|TICAM1|VDAC1|HIP1|PTPRH|ZFP36L1|TDGF1|C19orf12|ITGAV|SERPINF1|WT1…	226	4.70002e-05
regulation of programmed cell death (GO:0043067)	biological_process	P1	BMF|CASP4|SOX4|RASSF6|RPS3A|IFI6|GSN|GSDME|TFAP4|DLL1|PPP1CA|ARHGEF3|HSPB1|NUAK2|IGF1R|NIBAN2|OPN3|GLI2|PTPRZ1|TWIST1|RPS3|SLC25A4|NONO|IL12B|PPIF|LGALS1|DSTYK|ARRB2|CD28|SIK1|ANP32A|GATA6|YAP1|LRP5|PRKCA|DAB2|CBX4|CSF1R|LIMS2|CHST11|SMAD3|VDAC1|HIP1|ZFP36L1|TDGF1|ITGAV|WT1|BMP2|CNTFR|STEAP3|HRK|GATA3|ERBB3|ARAF|CD38|IFIT3|ANO6|TNFRSF12A|RPL11|PYCARD|MTCH1|ARHGEF16|H19|PRNP|PLA2G1B|HSPD1|APOE|CAL…	161	0.000156443
regulation of apoptotic process (GO:0042981)	biological_process	P1	BMF|CASP4|SOX4|RASSF6|RPS3A|IFI6|GSN|GSDME|TFAP4|DLL1|PPP1CA|ARHGEF3|HSPB1|NUAK2|IGF1R|NIBAN2|OPN3|GLI2|PTPRZ1|TWIST1|RPS3|NONO|IL12B|PPIF|LGALS1|DSTYK|ARRB2|CD28|SIK1|ANP32A|GATA6|YAP1|LRP5|PRKCA|DAB2|CBX4|CSF1R|LIMS2|CHST11|SMAD3|VDAC1|HIP1|ZFP36L1|TDGF1|ITGAV|WT1|BMP2|CNTFR|STEAP3|HRK|GATA3|ERBB3|ARAF|CD38|IFIT3|ANO6|TNFRSF12A|RPL11|PYCARD|MTCH1|ARHGEF16|H19|PRNP|PLA2G1B|HSPD1|APOE|CALHM2|TRIO…	157	0.000244157
organonitrogen compound metabolic process (GO:1901564)	biological_process	P1	NDN|EEF1A1P5|FAM20C|CAPN1|CDH1|CCDC22|VGLL4|EPHB2|ATP5MC2|DDAH1|MARCHF9|GGT1|OSBPL7|PKIA|BLOC1S1|SIRPA|HTRA3|CASP4|ST6GALNAC1|WFIKKN2|PLCL2|MTMR8|ZBED3|NAGLU|SOX4|WWTR1|APOC1|MMP23B|KDSR|RPS4Y1|RGS4|UBL4A|TRIM21|PTPN14|COLGALT2|AMHR2|B4GAT1|MMP2|RPS3A|IFI6|SULT1C4|CCBE1|PMEPA1|PAPSS1|MOV10|MVP|MSN|GSN|RNF150|PPIB|CHPF|EXTL2|ADAMTS5|PTPN5|GALNT18|FKBP9|TFAP4|DTX4|UBQLN2|FBXL19|RPL39|CKAP4|PGAM1|PL…	596	1.53154e-06
cell surface receptor signaling pathway involved in cell-cell signaling (GO:1905114)	biological_process	P1	VGLL4|WNT6|GNG2|ZBED3|SOX4|WWTR1|RGS4|MOV10|TNN|ZNRF3|IGFBP4|PPP1CA|ANKRD6|FZD2|GLI2|TSKU|COL1A1|PYGO2|PLCB3|PFN1|ARRB2|SOX13|PPP2R1A|YAP1|LRP5|DAB2|FZD1|RNF43|SMAD3|AMOTL2|NPY2R|BMP2|SH3GL1|NLGN2|LGR4|WIF1|GATA3|GLRB|APC2|NDP|APOE|TLE2|RBMS3|MED12|PPP3CA|GRK5|CITED1|BCL9L|CDK5|CHRNB1|SOX10|ADORA1|FZD8|FERMT1|SOX9|MEF2C|AMER1|ITGA3|MCC|MDFIC|CSNK1E|CPZ|FGF10|PSME1|GPRC5B|TLE5|P2RX7|MDFI|CDH3|LIMD…	75	0.00127398
Wnt signaling pathway (GO:0016055)	biological_process	P1	VGLL4|WNT6|GNG2|ZBED3|SOX4|WWTR1|MOV10|TNN|ZNRF3|IGFBP4|PPP1CA|ANKRD6|FZD2|TSKU|COL1A1|PYGO2|PLCB3|PFN1|ARRB2|SOX13|PPP2R1A|YAP1|LRP5|DAB2|FZD1|RNF43|SMAD3|AMOTL2|BMP2|LGR4|WIF1|GATA3|APC2|NDP|APOE|TLE2|RBMS3|MED12|PPP3CA|GRK5|CITED1|BCL9L|SOX10|FZD8|FERMT1|SOX9|AMER1|ITGA3|MCC|MDFIC|CSNK1E|CPZ|FGF10|PSME1|GPRC5B|TLE5|MDFI|CDH3|LIMD1|LRP1|CTNNB1|RAC1|EXT1	63	0.00342499
cell-cell signaling by wnt (GO:0198738)	biological_process	P1	VGLL4|WNT6|GNG2|ZBED3|SOX4|WWTR1|MOV10|TNN|ZNRF3|IGFBP4|PPP1CA|ANKRD6|FZD2|TSKU|COL1A1|PYGO2|PLCB3|PFN1|ARRB2|SOX13|PPP2R1A|YAP1|LRP5|DAB2|FZD1|RNF43|SMAD3|AMOTL2|BMP2|LGR4|WIF1|GATA3|APC2|NDP|APOE|TLE2|RBMS3|MED12|PPP3CA|GRK5|CITED1|BCL9L|SOX10|FZD8|FERMT1|SOX9|AMER1|ITGA3|MCC|MDFIC|CSNK1E|CPZ|FGF10|PSME1|GPRC5B|TLE5|MDFI|CDH3|LIMD1|LRP1|CTNNB1|RAC1|EXT1	63	0.00376355
canonical Wnt signaling pathway (GO:0060070)	biological_process	P1	WNT6|ZBED3|SOX4|WWTR1|TNN|ZNRF3|IGFBP4|PPP1CA|ANKRD6|FZD2|COL1A1|PYGO2|SOX13|YAP1|LRP5|DAB2|FZD1|SMAD3|BMP2|LGR4|GATA3|APC2|APOE|TLE2|RBMS3|MED12|BCL9L|SOX10|FZD8|FERMT1|SOX9|AMER1|MCC|CSNK1E|FGF10|PSME1|GPRC5B|TLE5|CDH3|LIMD1|CTNNB1|EXT1	42	0.0179657
negative regulation of protein modification process (GO:0031400)	biological_process	P1	EPHB2|PKIA|SIRPA|ZBED3|SOX4|WWTR1|RGS4|TRIM21|PMEPA1|MVP|TFAP4|TRIB2|CDKN1B|HSPB1|IGF1R|TWIST1|RPS3|YWHAB|PPP1R26|TRIB3|ARRB2|PPP2R1A|LRP5|PARP14|PRKAR2B|CAMK2N1|PPP1R1A|RPL11|PYCARD|PRNP|APOE|KLHL31|SMAD7|NCOA7|MGAT5|SOCS3|PKN1|FYN|CDK5|PDE4D|TAOK3|RPL23|CADM4|PPIA|SNCA|DTX3L|EMILIN1|RPL5|DMD|NCK2|DUSP16|DBNDD1|SMAD6|HEG1|GSTP1|BAX|CTDSP2|GMFB|GNL3L|SNTA1|ISG15|CTNNB1|PRKAR1B|ATP2B4|BEX4	65	0.00618866
negative regulation of transferase activity (GO:0051348)	biological_process	P1	EPHB2|PKIA|WWTR1|RGS4|MVP|TFAP4|TRIB2|CDKN1B|HSPB1|IGF1R|YWHAB|AJUBA|TRIB3|PPP2R1A|LRP5|PRKAR2B|CAMK2N1|RPL11|PYCARD|APOE|SMAD7|SOCS3|PKN1|TAOK3|RPL23|PPIA|SNCA|DTX3L|RPL5|TP53|DUSP16|DBNDD1|HEG1|GSTP1|GMFB|PRKAR1B	36	0.0391276
negative regulation of catalytic activity (GO:0043086)	biological_process	P1	EPHB2|PKIA|WFIKKN2|KLRK1|WWTR1|APOC1|RGS4|IFI6|MVP|TFAP4|TRIB2|CDKN1B|HSPB1|IGF1R|SERPINB8|YWHAB|PPP1R26|AJUBA|TRIB3|PPIF|ARRB2|ANXA3|PPP2R1A|LRP5|RDX|SERPINH1|SPOCK2|APOA1|SERPINF1|TNNI3|PRKAR2B|SH3BP4|CAMK2N1|ANOS1|PPP1R1A|RPL11|PYCARD|H19|PRNP|APOE|PEBP1|IFI16|EDNRB|F11R|SMAD7|CSRNP3|SERPINB1|EGLN1|CAMSAP3|NES|PCDH11X|MGAT5|CRIM1|SOCS3|DFFA|PKN1|TAOK3|VEGFA|A2ML1|PALM|RPL23|GAS6|PPIA|AIP|RTKN|…	88	0.00767839
negative regulation of molecular function (GO:0044092)	biological_process	P1	NDN|CCDC22|EPHB2|PKIA|WFIKKN2|KLRK1|WWTR1|APOC1|RGS4|TRIM21|IFI6|MVP|TFAP4|CD200|TRIB2|CDKN1B|PPP1CA|HSPB1|IGF1R|TWIST1|ACTB|SERPINB8|YWHAB|PPP1R26|AJUBA|TRIB3|PPIF|LY6E|ARRB2|ENHO|SIK1|ANXA3|PPP2R1A|LRP5|GNB5|NUCKS1|RDX|DAB2|SERPINH1|NLRC5|SPOCK2|APOA1|ITGAV|SERPINF1|TNNI3|PRKAR2B|SH3BP4|CAMK2N1|ANOS1|CNRIP1|PPP1R1A|RPL11|PYCARD|H19|PRNP|APOE|PEBP1|IFI16|EDNRB|F11R|SMAD7|PPP3CA|CSRNP3|SERPINB1|E…	134	1.55043e-05
negative regulation of phosphate metabolic process (GO:0045936)	biological_process	P1	EPHB2|PKIA|SIRPA|ZBED3|WWTR1|APOC1|RGS4|PMEPA1|MVP|TFAP4|TRIB2|CDKN1B|HSPB1|IGF1R|TWIST1|YWHAB|PPP1R26|AJUBA|TRIB3|PPIF|ARRB2|PPP2R1A|FBP1|LRP5|PARP14|PRKAR2B|CAMK2N1|PPP1R1A|PYCARD|INHA|H19|PRNP|APOE|KLHL31|SMAD7|CSRNP3|CAMSAP3|PCDH11X|MGAT5|SOCS3|PKN1|PDE4D|TAOK3|CADM4|PPIA|PDGFA|SNCA|EMILIN1|TP53|DMD|NCK2|DUSP16|DBNDD1|SMAD6|HEG1|GSTP1|BAX|CCDC8|CTDSP2|GMFB|LPCAT1|PRKAR1B	62	0.00672714
negative regulation of phosphorus metabolic process (GO:0010563)	biological_process	P1	EPHB2|PKIA|SIRPA|ZBED3|WWTR1|APOC1|RGS4|PMEPA1|MVP|TFAP4|TRIB2|CDKN1B|HSPB1|IGF1R|TWIST1|YWHAB|PPP1R26|AJUBA|TRIB3|PPIF|ARRB2|PPP2R1A|FBP1|LRP5|PARP14|PRKAR2B|CAMK2N1|PPP1R1A|PYCARD|INHA|H19|PRNP|APOE|KLHL31|SMAD7|CSRNP3|CAMSAP3|PCDH11X|MGAT5|SOCS3|PKN1|PDE4D|TAOK3|CADM4|PPIA|PDGFA|SNCA|EMILIN1|TP53|DMD|NCK2|DUSP16|DBNDD1|SMAD6|HEG1|GSTP1|BAX|CCDC8|CTDSP2|GMFB|LPCAT1|PRKAR1B	62	0.00699578
negative regulation of protein metabolic process (GO:0051248)	biological_process	P1	EPHB2|PKIA|SIRPA|WFIKKN2|ZBED3|SOX4|WWTR1|RGS4|TRIM21|IFI6|PMEPA1|MOV10|MVP|TFAP4|TRIB2|CDKN1B|HSPB1|IGF1R|TWIST1|RPS3|SERPINB8|YWHAB|PPP1R26|TRIB3|ARRB2|PPP2R1A|LRP5|ZFP36L2|SERPINH1|SMAD3|SPOCK2|CTSA|ZFP36L1|GRB7|PARP14|ITGAV|SERPINF1|OPHN1|PRKAR2B|CAMK2N1|ANOS1|PPP1R1A|RPL11|PYCARD|PRNP|APOE|PEBP1|IFI16|EDNRB|KLHL31|SMAD7|NOS2|NCOA7|ANG|SERPINB1|EIF2AK2|SHMT2|FTO|BACE2|MGAT5|CRIM1|GIPC1|SOCS3|…	113	0.00898488
negative regulation of cellular protein metabolic process (GO:0032269)	biological_process	P1	EPHB2|PKIA|SIRPA|WFIKKN2|ZBED3|SOX4|WWTR1|RGS4|TRIM21|IFI6|PMEPA1|MOV10|MVP|TFAP4|TRIB2|CDKN1B|HSPB1|IGF1R|TWIST1|RPS3|SERPINB8|YWHAB|PPP1R26|TRIB3|ARRB2|PPP2R1A|LRP5|ZFP36L2|SERPINH1|SPOCK2|ZFP36L1|GRB7|PARP14|SERPINF1|OPHN1|PRKAR2B|CAMK2N1|ANOS1|PPP1R1A|RPL11|PYCARD|PRNP|APOE|PEBP1|IFI16|EDNRB|KLHL31|SMAD7|NCOA7|ANG|SERPINB1|EIF2AK2|SHMT2|FTO|MGAT5|CRIM1|GIPC1|SOCS3|PKN1|FYN|CDK5|PDE4D|TAOK3|VE…	102	0.0423853
cellular macromolecule metabolic process (GO:0044260)	biological_process	P1	NDN|EEF1A1P5|LSM7|FAM20C|CAPN1|CDH1|CCDC22|ZNF219|VGLL4|EPHB2|WNT6|PATZ1|MARCHF9|GGT1|OSBPL7|ZNF347|PKIA|BLOC1S1|SIRPA|ST6GALNAC1|ATF7|WFIKKN2|PLCL2|ZNF835|MTMR8|ZBED3|H1-0|STOX2|SOX4|PHF6|WWTR1|RPS4Y1|RGS4|UBL4A|ZFHX3|TRIM21|PTPN14|COLGALT2|AMHR2|B4GAT1|MMP2|IRF2|RPS3A|IFI6|TCF21|CCBE1|PMEPA1|UBTF|MOV10|MVP|CREB3L4|MSN|GSN|RNF150|PPIB|CHPF|EXTL2|H1-10|THAP11|PTPN5|IRS1|GALNT18|FKBP9|TFAP4|DTX4|U…	713	5.12739e-06
intracellular signal transduction (GO:0035556)	biological_process	P1	SEMA6A|BMF|CCDC22|VGLL4|EPHB2|DDAH1|ARHGAP22|SIRPA|CASP4|CCR1|PLCL2|SOX4|WWTR1|RGS4|TRIM21|RHOC|IFI6|GSN|GSDME|PLEK2|IRS1|TFAP4|ROBO1|IGFBP4|CDKN1B|ARHGEF3|HSPB1|NUAK2|ANKRD6|IGF1R|SEMA4C|FGR|TWIST1|CXXC5|RPS3|BCAR3|ATP1B1|DCLK1|YWHAB|NONO|FAT4|AJUBA|IFI35|IL12B|TRIB3|PPIF|ADRB3|PLCB3|INSR|LGALS1|DSTYK|ARRB2|CD28|SIK1|ANP32A|PPP2R1A|CAMKK2|ARAP2|YAP1|FBP1|ABCA1|CC2D1A|PRKCA|ZFP36L2|COL3A1|RDX|CSF…	272	6.76992e-06
cellular response to oxygen-containing compound (GO:1901701)	biological_process	P1	CDH1|WNT6|OSBPL7|SIRPA|CASP4|GNG2|SOX4|RGS4|MMP2|MSN|COL5A2|COL4A1|IRS1|GNRHR|TFAP4|INSRR|IGF1R|RPS3|ACTB|BCAR3|COL1A1|KCNQ1|IL12B|TRIB3|PPIF|INSR|LGALS1|ACHE|ARRB2|ENHO|KLF3|SLC38A2|CAMKK2|YAP1|ETS1|GPR27|LRP5|GNB5|PRKCA|NUCKS1|STAT6|PTPRE|TICAM1|COLEC12|ZFP36L1|TWF2|SERPINF1|WT1|PRKAR2B|LPIN3|KLF7|MGARP|SH3BP4|CAMK2N1|PYCARD|H19|PRNP|PLA2G1B|EDNRB|GNA14|PIK3R1|SHPK|NOS2|PPP3CA|SOCS3|RAPGEF3|ITG…	128	0.000775981
response to peptide (GO:1901652)	biological_process	P1	CASP4|ZBED3|MMP2|IRS1|GNRHR|INSRR|IGF1R|BCAR3|COL1A1|TRIB3|INSR|ENHO|KLF3|LRP5|NUCKS1|STAT6|PTPRE|ZFP36L1|SERPINF1|PRKAR2B|LPIN3|MGARP|PRNP|PLA2G1B|EDNRB|PIK3R1|CITED1|SOCS3|FYN|CDK5|ADCY6|HSD11B2|APEX1|RAB15|CDK4|RPL23|NR5A1|CYP11A1|APRT|QDPR|NFE2L2|SCAP|SPARC|UPRT|ASS1|APPL1|OXTR|CRHBP|TP53|JAG1|TRIM16|DAG1|CXCL12|IGF2|SLC39A14|GSTP1|INHBB|JAK3|LRP1|IQGAP1|TLR4|CYBB|VIM|NFKBIA|PRKAR1B|SOGA1	66	0.00117419
cellular response to organonitrogen compound (GO:0071417)	biological_process	P1	CDH1|CASP4|GNG2|RGS4|MMP2|COL5A2|COL4A1|IRS1|GNRHR|INSRR|IGF1R|ACTB|BCAR3|COL1A1|KCNQ1|TRIB3|INSR|ARRB2|ENHO|KLF3|GNB5|NUCKS1|STAT6|PTPRE|ZFP36L1|WT1|PRKAR2B|LPIN3|MGARP|SH3BP4|PRNP|PLA2G1B|GNA14|PIK3R1|TMEM38A|SOCS3|RAPGEF3|FYN|CDK5|ADCY6|SOX9|MEF2C|APEX1|RAB15|PDXP|CDK4|PALM|RGS9|RPL23|CYP11A1|APRT|SNCA|NFE2L2|ASS1|APPL1|CRHBP|DNMT3A|TP53|CTNNA1|STC1|IGF2|SLC39A14|GSTP1|COL1A2|P2RX7|NSG1|INHBB|…	77	0.00191536
cellular response to nitrogen compound (GO:1901699)	biological_process	P1	CDH1|CASP4|GNG2|RGS4|MMP2|COL5A2|COL4A1|IRS1|GNRHR|INSRR|IGF1R|ACTB|BCAR3|COL1A1|KCNQ1|TRIB3|INSR|ACHE|ARRB2|ENHO|KLF3|GNB5|NUCKS1|STAT6|PTPRE|COLEC12|ZFP36L1|WT1|PRKAR2B|LPIN3|MGARP|SH3BP4|PRNP|PLA2G1B|GNA14|PIK3R1|TMEM38A|SOCS3|RAPGEF3|FYN|CDK5|ADCY6|RALB|SOX9|MEF2C|APEX1|RAB15|PDXP|CDK4|PALM|RGS9|RPL23|CYP11A1|APRT|SNCA|NFE2L2|ASS1|APPL1|CRHBP|DNMT3A|TP53|CTNNA1|STC1|IGF2|SLC39A14|GSTP1|COL1A2…	80	0.00462444
response to oxygen-containing compound (GO:1901700)	biological_process	P1	ILDR2|CDH1|WNT6|GGT1|OSBPL7|SIRPA|CASP4|GNG2|ZBED3|SOX4|RGS4|MMP2|MSN|GSN|COL5A2|COL4A1|IRS1|GNRHR|TFAP4|INSRR|SCD|IGF1R|TRPC3|RPS3|ACTB|BCAR3|COL1A1|KCNQ1|IL12B|TRIB3|PPIF|INSR|LGALS1|ACHE|ARRB2|ENHO|KLF3|SLC38A2|CAMKK2|GATA6|YAP1|ETS1|GPR27|LRP5|GNB5|PRKCA|NUCKS1|STAT6|ELANE|PTPRE|NCOA2|TICAM1|RPS4X|COLEC12|ZFP36L1|TWF2|SERPINF1|WT1|MMP15|AQP3|PRKAR2B|LPIN3|KLF7|MGARP|PANX1|SH3BP4|CAMK2N1|GATA3…	181	9.66465e-06
response to organonitrogen compound (GO:0010243)	biological_process	P1	CDH1|CASP4|GNG2|ZBED3|RGS4|MMP2|GSN|COL5A2|COL4A1|IRS1|GNRHR|UBQLN2|INSRR|IGF1R|TRPC3|ACTB|BCAR3|COL1A1|KCNQ1|TRIB3|INSR|ARRB2|ENHO|KLF3|ABCA1|LRP5|GNB5|NUCKS1|STAT6|USP13|PTPRE|TICAM1|TMUB1|ZFP36L1|SERPINF1|WT1|PRKAR2B|LPIN3|MGARP|PANX1|SH3BP4|GLRB|NCOR2|PRNP|PLA2G1B|APOE|EDNRB|GNA14|PIK3R1|PPP3CA|TMEM38A|EDEM2|CITED1|HNMT|SOCS3|RAPGEF3|ITGA2|FYN|CDK5|FLT3|ADCY6|HSD11B2|SREBF2|LDLR|CD9|SOX9|MEF2…	120	0.000102759
response to nitrogen compound (GO:1901698)	biological_process	P1	CDH1|CASP4|GNG2|ZBED3|RGS4|MMP2|GSN|COL5A2|COL4A1|IRS1|GNRHR|UBQLN2|INSRR|IGF1R|TRPC3|ACTB|BCAR3|COL1A1|KCNQ1|TRIB3|INSR|ACHE|ARRB2|ENHO|KLF3|ABCA1|LRP5|GNB5|NUCKS1|STAT6|USP13|PTPRE|TICAM1|IFNE|TMUB1|COLEC12|ZFP36L1|SERPINF1|WT1|PRKAR2B|LPIN3|MGARP|PANX1|SH3BP4|GLRB|NCOR2|PRNP|PLA2G1B|APOE|EDNRB|GNA14|PIK3R1|PPP3CA|TMEM38A|EDEM2|EGLN1|CITED1|HNMT|SOCS3|RAPGEF3|ITGA2|FYN|CDK5|FLT3|ADCY6|HSD11B2|S…	126	0.000208161
response to hormone (GO:0009725)	biological_process	P1	GNG2|ZBED3|TCF21|PMEPA1|IRS1|GNRHR|TFAP4|INSRR|IGF1R|BCAR3|COL1A1|YWHAH|TRIB3|INSR|ENHO|ANXA3|GATA6|YAP1|LRP5|NUCKS1|ZFP36L2|RDX|DAB2|STAT6|PLOD3|APOA1|PTPRE|NCOA2|ZFP36L1|SERPINF1|WT1|PRKAR2B|LPIN3|MGARP|LGR4|GATA3|CD38|NCOR2|PLA2G1B|ZMIZ1|RBBP7|EDNRB|PIK3R1|NOS2|BCL2|ANG|FAM107A|CITED1|HNMT|SOCS3|ITGA2|FYN|SOX10|FLT3|ADCY6|HSD11B2|MEF2C|APEX1|MMP14|RAB15|CDK4|NR5A1|CYP11A1|APRT|TGFBR2|ESR2|QDPR…	98	0.00209652
positive regulation of cell migration (GO:0030335)	biological_process	P1	SEMA6A|CCR1|RHOC|CCBE1|PLA2G7|ATP8A1|HSPB1|BMPR2|IGF1R|SEMA4C|FGR|COL1A1|INSR|PFN1|ANXA3|ETS1|PRKCA|RDX|DAB2|SEMA6B|CSF1R|SMAD3|NEDD9|GRB7|TDGF1|ITGAV|GLIPR2|BMP2|DOCK1|GATA3|ANO6|PYCARD|RAC2|MAPRE2|POSTN|PIK3R1|PDPN|BCL2|PPP3CA|CPNE3|FAM107A|RIN2|MGAT5|ITGA2|FAM110C|ITGA6|VEGFA|GRN|FERMT1|PRKD1|SOX9|MMP14|GAS6|IL6R|SYNE2|TGFBR2|PDGFA|F2R|NFE2L2|CXCR4|ITGA3|DDR2|JAM2|FGF10|SPARC|SYDE1|SEMA7A|ACTN…	76	1.05671e-05
positive regulation of cell motility (GO:2000147)	biological_process	P1	SEMA6A|CCR1|RHOC|CCBE1|PLA2G7|ATP8A1|HSPB1|BMPR2|IGF1R|SEMA4C|FGR|TWIST1|COL1A1|INSR|PFN1|ANXA3|ETS1|PRKCA|RDX|DAB2|SEMA6B|CSF1R|SMAD3|SPOCK2|NEDD9|GRB7|TDGF1|ITGAV|GLIPR2|BMP2|DOCK1|GATA3|ANO6|PYCARD|RAC2|MAPRE2|POSTN|PIK3R1|PDPN|BCL2|PPP3CA|CPNE3|FAM107A|RIN2|MGAT5|ITGA2|FAM110C|ITGA6|VEGFA|GRN|FERMT1|PRKD1|SOX9|MMP14|GAS6|IL6R|SYNE2|TGFBR2|PDGFA|F2R|NFE2L2|CXCR4|ITGA3|DDR2|JAM2|FGF10|SPARC|SYD…	78	1.36785e-05
positive regulation of cellular component movement (GO:0051272)	biological_process	P1	SEMA6A|CCR1|RHOC|CCBE1|PLA2G7|ATP8A1|HSPB1|BMPR2|IGF1R|SEMA4C|FGR|TWIST1|COL1A1|INSR|PFN1|ANXA3|ETS1|PRKCA|RDX|DAB2|SEMA6B|CSF1R|SMAD3|SPOCK2|NEDD9|GRB7|TDGF1|ITGAV|GLIPR2|BMP2|DOCK1|GATA3|ANO6|PYCARD|RAC2|MAPRE2|POSTN|PIK3R1|PDPN|BCL2|PPP3CA|CPNE3|FAM107A|RIN2|MGAT5|ITGA2|FAM110C|ITGA6|VEGFA|GRN|FERMT1|PRKD1|SOX9|MMP14|GAS6|IL6R|SYNE2|TGFBR2|PDGFA|F2R|NFE2L2|CXCR4|ITGA3|DDR2|JAM2|FGF10|SPARC|SYD…	78	2.90459e-05
positive regulation of locomotion (GO:0040017)	biological_process	P1	SEMA6A|CCR1|RHOC|CCBE1|PLA2G7|ATP8A1|HSPB1|BMPR2|IGF1R|SEMA4C|FGR|TWIST1|COL1A1|INSR|PFN1|ANXA3|ETS1|PRKCA|RDX|DAB2|SEMA6B|CSF1R|SMAD3|SPOCK2|NEDD9|GRB7|TDGF1|ITGAV|GLIPR2|BMP2|DOCK1|GATA3|ANO6|PYCARD|RAC2|MAPRE2|POSTN|PIK3R1|PDPN|BCL2|PPP3CA|CPNE3|FAM107A|RIN2|MGAT5|ITGA2|FAM110C|ITGA6|VEGFA|GRN|FERMT1|PRKD1|SOX9|MMP14|GAS6|IL6R|SYNE2|TGFBR2|PDGFA|F2R|NFE2L2|CXCR4|ITGA3|DDR2|JAM2|FGF10|SPARC|SYD…	78	3.08747e-05
regulation of metabolic process (GO:0019222)	biological_process	P1	NDN|LSM7|CAPN1|CDH1|BMF|CCDC22|ZNF219|VGLL4|EPHB2|WNT6|DDAH1|PATZ1|OSBPL7|ZNF347|PKIA|SIRPA|CCR1|ATF7|WFIKKN2|PLCL2|ZNF835|MTMR8|ZBED3|H1-0|STOX2|SOX4|PHF6|WWTR1|APOC1|RPS4Y1|RGS4|ZFHX3|TRIM21|PTPN14|IRF2|RPS3A|IFI6|TCF21|CCBE1|PMEPA1|UBTF|MOV10|MVP|CREB3L4|MSN|CCDC3|GSN|ADAMTS5|H1-10|THAP11|IRS1|TFAP4|DTX4|UBQLN2|DLL1|FBXL19|RPL39|PGAM1|CD200|ZC3HAV1|TRIB2|INSRR|ROBO1|ZNF493|TSC22D4|IGFBP4|ABHD6…	636	1.12968e-05
regulation of macromolecule metabolic process (GO:0060255)	biological_process	P1	NDN|LSM7|CDH1|CCDC22|ZNF219|VGLL4|EPHB2|WNT6|PATZ1|OSBPL7|ZNF347|PKIA|SIRPA|CCR1|ATF7|WFIKKN2|PLCL2|ZNF835|ZBED3|H1-0|STOX2|SOX4|PHF6|WWTR1|RPS4Y1|RGS4|ZFHX3|TRIM21|PTPN14|IRF2|RPS3A|IFI6|TCF21|CCBE1|PMEPA1|UBTF|MOV10|MVP|CREB3L4|MSN|CCDC3|GSN|H1-10|THAP11|IRS1|TFAP4|DTX4|UBQLN2|DLL1|FBXL19|RPL39|PGAM1|CD200|ZC3HAV1|TRIB2|ROBO1|ZNF493|TSC22D4|CDKN1B|PPP1CA|VSIG4|HSPB1|BMPR2|FZD2|IGF1R|NIBAN2|ATXN…	587	6.78452e-05
positive regulation of molecular function (GO:0044093)	biological_process	P1	EPHB2|ARHGAP22|PLCL2|H1-0|RGS4|TRIM21|TBC1D9|RHOC|GSN|IRS1|TFAP4|CD200|INSRR|ROBO1|FZD2|IGF1R|NIBAN2|FGR|TWIST1|RPS3|BCAR3|LRRC38|ATP1B1|YWHAB|AJUBA|PYGO2|IL12B|TRIB3|INSR|AMH|DSTYK|PFN1|ANXA3|ARAP2|PLSCR1|LRP5|GNB5|CSF1R|FZD1|SMAD3|EMP2|ARID5B|APOA1|ELANE|GLRX|TICAM1|SERINC5|NEDD9|LARP6|HIP1|TDGF1|BMP2|OPHN1|DOCK1|PRKAR2B|EPHA2|GATA3|ERBB3|ARAF|APC2|NDP|ARHGAP1|RPL11|PYCARD|ERBB4|MTCH1|ANTXR1|AR…	188	1.23204e-05
positive regulation of catalytic activity (GO:0043085)	biological_process	P1	EPHB2|ARHGAP22|RGS4|TBC1D9|RHOC|GSN|IRS1|TFAP4|CD200|INSRR|ROBO1|IGF1R|FGR|RPS3|BCAR3|ATP1B1|YWHAB|AJUBA|IL12B|TRIB3|INSR|DSTYK|PFN1|ARAP2|PLSCR1|GNB5|CSF1R|SMAD3|EMP2|APOA1|ELANE|SERINC5|NEDD9|HIP1|TDGF1|BMP2|OPHN1|DOCK1|PRKAR2B|EPHA2|ERBB3|ARAF|APC2|ARHGAP1|PYCARD|ERBB4|MTCH1|ANTXR1|ARHGEF16|MAPRE2|PRNP|ARHGAP24|PLA2G1B|HSPD1|APOE|IFI16|ARHGEF10L|RASAL1|F11R|NOS2|BCL2|MSH6|ANG|MAP3K21|ERBB2|EIF…	149	0.000293095
organonitrogen compound biosynthetic process (GO:1901566)	biological_process	P1	EEF1A1P5|ATP5MC2|GGT1|ST6GALNAC1|SOX4|KDSR|RPS4Y1|B4GAT1|RPS3A|PAPSS1|MOV10|CHPF|EXTL2|GALNT18|RPL39|GALNT16|SCD|PPP1CA|HSPB1|IMPDH2|BMPR2|UCK2|GMPR|RPS3|TET1|HAS3|C1GALT1C1|RPL29|NDST4|ACHE|CHST14|RPS16|CD28|ST8SIA5|PDF|ACSL4|PLSCR1|PCYT1B|ST3GAL2|ZFP36L2|RPL35|CNDP2|CHST11|UROD|PHGDH|ST6GALNAC4|PLOD3|APOA1|ELANE|RPS28|RPS13|SULT1A2|GSTA1|SERINC5|LARP6|RPL12|RPS4X|ZFP36L1|GRB7|NPR1|POGLUT3|RPL18…	192	1.27697e-05
negative regulation of cellular metabolic process (GO:0031324)	biological_process	P1	NDN|BMF|ZNF219|VGLL4|EPHB2|PATZ1|PKIA|SIRPA|WFIKKN2|MTMR8|ZBED3|H1-0|SOX4|PHF6|WWTR1|APOC1|RGS4|ZFHX3|TRIM21|IRF2|IFI6|TCF21|PMEPA1|MOV10|MVP|H1-10|THAP11|TFAP4|UBQLN2|TRIB2|TSC22D4|CDKN1B|HSPB1|BMPR2|IGF1R|NIBAN2|OPN3|GLI2|DPF3|TWIST1|EID1|CXXC5|RPS3|SERPINB8|TET1|NFIC|YWHAB|NONO|PPP1R26|NKX6-3|AJUBA|TRIB3|PPIF|KDM4A|ARRB2|SOX13|SIK1|KLF3|PPP2R1A|BCL7A|GATA6|YAP1|FBP1|ZNF536|HNRNPA1|SMAD5|CC2D1A…	264	1.34738e-05
negative regulation of nitrogen compound metabolic process (GO:0051172)	biological_process	P1	NDN|ZNF219|VGLL4|EPHB2|PATZ1|PKIA|SIRPA|WFIKKN2|ZBED3|H1-0|SOX4|PHF6|WWTR1|APOC1|RGS4|ZFHX3|TRIM21|IRF2|IFI6|TCF21|PMEPA1|MOV10|MVP|H1-10|THAP11|TFAP4|TRIB2|TSC22D4|CDKN1B|HSPB1|BMPR2|IGF1R|NIBAN2|GLI2|DPF3|TWIST1|EID1|CXXC5|RPS3|SERPINB8|TET1|NFIC|YWHAB|NONO|PPP1R26|NKX6-3|AJUBA|TRIB3|KDM4A|ARRB2|SOX13|KLF3|PPP2R1A|BCL7A|GATA6|YAP1|FBP1|ZNF536|HNRNPA1|SMAD5|CC2D1A|LRP5|DEAF1|ZFP36L2|DAB2|SERPINH…	246	2.07522e-05
regulation of cellular metabolic process (GO:0031323)	biological_process	P1	NDN|CAPN1|CDH1|BMF|CCDC22|ZNF219|VGLL4|EPHB2|WNT6|DDAH1|PATZ1|OSBPL7|ZNF347|PKIA|SIRPA|ATF7|WFIKKN2|PLCL2|ZNF835|MTMR8|ZBED3|H1-0|STOX2|SOX4|PHF6|WWTR1|APOC1|RGS4|ZFHX3|TRIM21|PTPN14|IRF2|IFI6|TCF21|CCBE1|PMEPA1|UBTF|MOV10|MVP|CREB3L4|MSN|GSN|H1-10|THAP11|IRS1|TFAP4|UBQLN2|DLL1|FBXL19|PGAM1|CD200|ZC3HAV1|TRIB2|INSRR|ROBO1|ZNF493|TSC22D4|IGFBP4|CDKN1B|PPP1CA|HSPB1|BMPR2|FZD2|IGF1R|NIBAN2|CD63|OPN3…	549	1.44619e-05
regulation of primary metabolic process (GO:0080090)	biological_process	P1	NDN|CDH1|CCDC22|ZNF219|VGLL4|EPHB2|WNT6|PATZ1|OSBPL7|ZNF347|PKIA|SIRPA|ATF7|WFIKKN2|PLCL2|ZNF835|ZBED3|H1-0|STOX2|SOX4|PHF6|WWTR1|APOC1|RGS4|ZFHX3|TRIM21|PTPN14|IRF2|IFI6|TCF21|CCBE1|PMEPA1|UBTF|MOV10|MVP|CREB3L4|MSN|CCDC3|GSN|H1-10|THAP11|IRS1|TFAP4|UBQLN2|DLL1|FBXL19|PGAM1|CD200|ZC3HAV1|TRIB2|ROBO1|ZNF493|TSC22D4|IGFBP4|ABHD6|CDKN1B|SCD|PPP1CA|HSPB1|BMPR2|FZD2|IGF1R|NIBAN2|GLI2|DPF3|CHD6|CTDSP1…	526	6.95631e-05
regulation of nitrogen compound metabolic process (GO:0051171)	biological_process	P1	NDN|CDH1|CCDC22|ZNF219|VGLL4|EPHB2|WNT6|DDAH1|PATZ1|OSBPL7|ZNF347|PKIA|SIRPA|ATF7|WFIKKN2|PLCL2|ZNF835|ZBED3|H1-0|STOX2|SOX4|PHF6|WWTR1|APOC1|RGS4|ZFHX3|TRIM21|PTPN14|IRF2|IFI6|TCF21|CCBE1|PMEPA1|UBTF|MOV10|MVP|CREB3L4|MSN|GSN|H1-10|THAP11|TFAP4|UBQLN2|DLL1|FBXL19|PGAM1|CD200|ZC3HAV1|TRIB2|ROBO1|ZNF493|TSC22D4|CDKN1B|PPP1CA|HSPB1|BMPR2|FZD2|IGF1R|NIBAN2|GLI2|DPF3|CHD6|CTDSP1|FGR|POGK|TWIST1|EID1|…	508	0.000113283
skeletal system development (GO:0001501)	biological_process	P1	ZNF219|HAPLN1|WFIKKN2|SOX4|MMP2|ARSL|PAPSS1|PPIB|COL5A2|BMPR2|GLI2|FGR|TWIST1|COL27A1|TSKU|COL1A1|FAT4|SMAD5|LRP5|DEAF1|COL3A1|SERPINH1|RAB33B|CHST11|ZFAND5|SMAD3|ARID5B|SLC39A1|BMP2|MTHFD1|HOXD4|EPHA2|ADAMTS7|BMPR1A|INHA|DHRS3|RAI1|LOXL2|NOTCH2|SMAD7|MED12|SOX9|MEF2C|VCAN|MMP14|MBTPS2|GDF3|TLL1|ANKH|TGFBR2|CHI3L1|ANXA6|AMER1|SOX11|ETS2|CHSY1|LTBP3|NFIB|FOXN3|TP53|STC1|IGF2|SLC39A14|COL1A2|TLE5|M…	69	2.72923e-05
embryo development (GO:0009790)	biological_process	P1	EPHB2|WNT6|C6|ZBED3|STOX2|NAGLU|SOX4|MMP2|TCF21|COL5A2|DLL1|BMPR2|FZD2|NIBAN2|SEMA4C|GLI2|TWIST1|TET1|COL1A1|INSR|TFEB|USP22|ACSL4|GATA6|YAP1|SH3PXD2A|SMAD5|LRP5|DEAF1|CHST11|ZFAND5|PHGDH|SMAD3|PLOD3|APOA1|SLC39A1|LAMA2|ZFP36L1|TDGF1|ITGAV|WT1|BMP2|ITGB5|MMP15|MTHFD1|HOXD4|ITGA8|EPHA2|GATA3|PRPF19|ERBB4|BMPR1A|COL5A1|ZMIZ1|EPAS1|ZFPM2|NOTCH2|MED12|SLITRK6|CITED1|CAMSAP3|NES|PBX3|LFNG|TSHZ1|SOCS3|…	109	0.00226963
embryo development ending in birth or egg hatching (GO:0009792)	biological_process	P1	C6|STOX2|SOX4|DLL1|BMPR2|FZD2|SEMA4C|GLI2|TWIST1|TET1|COL1A1|TFEB|USP22|ACSL4|GATA6|YAP1|SH3PXD2A|DEAF1|CHST11|ZFAND5|PHGDH|SMAD3|PLOD3|SLC39A1|ZFP36L1|TDGF1|BMP2|MTHFD1|HOXD4|EPHA2|GATA3|PRPF19|BMPR1A|ZMIZ1|EPAS1|ZFPM2|NOTCH2|MED12|CITED1|CAMSAP3|LFNG|SOCS3|SOX10|VEGFA|SOX9|MMP14|HES1|TGFBR2|SOX11|APOB|HEY2|NKX3-1|MYH9|TANC2|TP53|SLC25A34|KRT8|IGF2|HEG1|MDFI|CTNNB1|SALL2|EXT1|SPINT1	64	0.0488907
regulation of binding (GO:0051098)	biological_process	P1	WFIKKN2|PLCL2|H1-0|TRIM21|TFAP4|PPP1CA|NIBAN2|TWIST1|ACTB|PYGO2|TRIB3|ARRB2|ENHO|NUCKS1|DAB2|SMAD3|TICAM1|LARP6|BMP2|GATA3|RPL11|ZNF618|APOE|IFI16|PPP3CA|PBXIP1|SMARCD3|NES|ITGA2|CDK5|RALB|HES1|SNAPIN|SOX11|B2M|CSNK1E|CFHR1|DTX3L|HEY2|NKX3-1|IFIT2|ZBTB7C|BCL3|S100A10|ATP2A3|PTPRF|TLE5|JUN|MDFI|BAX|LRP1|GNL3L|HIPK2|CTNNB1|NFKBIA|CDON	56	1.78882e-05
regulation of gene expression (GO:0010468)	biological_process	P1	NDN|LSM7|CDH1|CCDC22|ZNF219|VGLL4|EPHB2|WNT6|PATZ1|ZNF347|PKIA|SIRPA|CCR1|ATF7|ZNF835|ZBED3|H1-0|STOX2|SOX4|PHF6|WWTR1|RPS4Y1|ZFHX3|TRIM21|PTPN14|IRF2|RPS3A|TCF21|CCBE1|UBTF|MOV10|CREB3L4|MSN|CCDC3|GSN|H1-10|THAP11|TFAP4|DTX4|DLL1|FBXL19|RPL39|CD200|ZC3HAV1|TRIB2|ROBO1|ZNF493|TSC22D4|CDKN1B|PPP1CA|VSIG4|HSPB1|BMPR2|FZD2|NIBAN2|ATXN7L3B|GLI2|DPF3|CHD6|CTDSP1|FGR|POGK|TWIST1|EID1|CXXC5|RPS3|ACTB|TE…	480	1.90259e-05
exocytosis (GO:0006887)	biological_process	P1	CAPN1|SIRPA|CCR1|MVP|GSN|CKAP4|PGAM1|ATP8A1|IMPDH2|CD63|FGR|MAGED2|TLN1|PLEKHO2|ANXA3|RIMS3|RAB6A|RAB33B|APOA1|ELANE|GHDC|CTSA|ITGAV|PRDX6|SYT1|ANO6|PYCARD|RAC2|ENDOD1|CPNE3|SERPINB1|HGSNAT|AMPD3|STK10|GIPC1|ACTR1B|VAT1|CDK5|RIMS4|VEGFA|CD9|SELL|GRN|RALB|VCL|RHOG|EEF1A1|RAB15|TRAPPC1|STX11|GAS6|SNAPIN|SYT2|PPIA|APRT|PDGFA|CHI3L1|SNCA|DSP|ANPEP|HUWE1|TNFAIP2|ALDOA|PROS1|B2M|SPARC|OTOF|CYB5R3|CD47|…	93	0.0258818
myeloid leukocyte activation (GO:0002274)	biological_process	P1	CAPN1|SIRPA|MVP|GSN|CKAP4|PGAM1|CD200|VSIG4|ATP8A1|IMPDH2|CD63|FGR|IFI35|PLEKHO2|ANXA3|PLSCR1|RAB6A|RELB|ELANE|GHDC|TICAM1|CTSA|ITGAV|PRDX6|ANO6|C1QA|PYCARD|RAC2|HSPD1|LRFN5|NOTCH2|SHPK|CPNE3|CRTC3|SERPINB1|HGSNAT|AMPD3|STK10|ACTR1B|VAT1|LDLR|SELL|GRN|VCL|RHOG|EEF1A1|TRAPPC1|PPIA|APRT|TGFBR2|CHI3L1|SNCA|DSP|ANPEP|HUWE1|ALDOA|B2M|CYB5R3|CD47|GAB2|SYK|SLC2A3|GSTP1|CD14|PREX1|CR1|SYT11|IQGAP1|S100A1…	74	0.0118088
cell activation involved in immune response (GO:0002263)	biological_process	P1	CAPN1|SIRPA|PLCL2|MVP|GSN|DLL1|CKAP4|PGAM1|ATP8A1|IMPDH2|CD63|FGR|IFI35|IL12B|LGALS1|CD28|PLEKHO2|ANXA3|APBB1IP|RAB6A|RELB|ELANE|GHDC|TICAM1|IFNE|CTSA|ITGAV|PRDX6|GATA3|ANO6|NFKBID|PYCARD|RAC2|HSPD1|NOTCH2|SMAD7|MSH6|CPNE3|SERPINB1|HGSNAT|AMPD3|LFNG|STK10|NDFIP1|ACTR1B|VAT1|SELL|GRN|VCL|RHOG|EEF1A1|TRAPPC1|PPIA|IL6R|APRT|CHI3L1|DSP|ANPEP|HUWE1|ALDOA|B2M|CYB5R3|CD47|SHLD1|BCL3|GAB2|SYK|TP53|SLC2A3…	82	0.00574234
leukocyte activation (GO:0045321)	biological_process	P1	CAPN1|PATZ1|SIRPA|PLCL2|KLRK1|SOX4|MVP|MSN|GSN|DLL1|MR1|CKAP4|PGAM1|CD200|VSIG4|ATP8A1|IMPDH2|CD63|GLI2|FGR|RPS3|IFI35|IL12B|LGALS1|CD28|PLEKHO2|DTX1|SOX13|ANXA3|PLSCR1|APBB1IP|ZFP36L2|RAB6A|RELB|SMAD3|ELANE|GHDC|TICAM1|IFNE|CTSA|ZFP36L1|ITGAV|SH3KBP1|PRDX6|GATA3|CD38|TNFSF13B|ANO6|NFKBID|C1QA|PYCARD|RAC2|INHA|PRNP|HSPD1|ZMIZ1|PIK3R1|LRFN5|NOTCH2|SHPK|SMAD7|BCL2|MSH6|PPP3CA|CPNE3|CRTC3|SERPINB1|E…	136	0.00231814
export from cell (GO:0140352)	biological_process	P1	CAPN1|ILDR2|SIRPA|TVP23A|CCR1|SOX4|MVP|GSN|IRS1|CKAP4|PGAM1|CD200|ATP8A1|IMPDH2|NIBAN2|CD63|FGR|MAGED2|SLC25A4|ATP1B1|KCNQ1|IL12B|TLN1|ACHE|ABCG2|PLEKHO2|ENHO|ANXA3|SLC38A2|ACSL4|ABCA1|GPR27|LRP5|PRKCA|RIMS3|RAB6A|RAB33B|APOA1|ELANE|PCSK6|GHDC|RHBDF1|CTSA|ITGAV|NPY2R|BMP2|STEAP3|PRDX6|KLF7|NLGN2|CAMK2N1|GATA3|CD38|SYT1|ANO6|PYCARD|SLC8B1|RAC2|INHA|PLA2G1B|APOE|FRMD4A|ENDOD1|OLFM2|NOS2|PPP3CA|ABCG…	154	5.83712e-05
leukocyte activation involved in immune response (GO:0002366)	biological_process	P1	CAPN1|SIRPA|PLCL2|MVP|GSN|DLL1|CKAP4|PGAM1|ATP8A1|IMPDH2|CD63|FGR|IFI35|IL12B|LGALS1|CD28|PLEKHO2|ANXA3|APBB1IP|RAB6A|RELB|ELANE|GHDC|TICAM1|IFNE|CTSA|ITGAV|PRDX6|GATA3|ANO6|NFKBID|PYCARD|RAC2|HSPD1|NOTCH2|SMAD7|MSH6|CPNE3|SERPINB1|HGSNAT|AMPD3|LFNG|STK10|NDFIP1|ACTR1B|VAT1|SELL|GRN|VCL|RHOG|EEF1A1|TRAPPC1|PPIA|IL6R|APRT|CHI3L1|DSP|ANPEP|HUWE1|ALDOA|B2M|CYB5R3|CD47|SHLD1|BCL3|GAB2|SYK|TP53|SLC2A3…	81	0.0073209
cell activation (GO:0001775)	biological_process	P1	CAPN1|PATZ1|SIRPA|PLCL2|GNG2|KLRK1|SOX4|MVP|MSN|GSN|DLL1|MR1|CKAP4|PGAM1|CD200|VSIG4|ATP8A1|HSPB1|IMPDH2|CD63|GLI2|FGR|TRPC3|RPS3|ACTB|C1GALT1C1|COL1A1|MYL12A|IFI35|IL12B|TLN1|LGALS1|ARRB2|CD28|PLEKHO2|DTX1|SOX13|ANXA3|PLSCR1|PRKCA|APBB1IP|ZFP36L2|COL3A1|RAB6A|RELB|SMAD3|ELANE|GHDC|TICAM1|IFNE|CTSA|ZFP36L1|ITGAV|SH3KBP1|PRDX6|GATA3|CD38|TNFSF13B|ANO6|GP1BA|NFKBID|C1QA|PYCARD|RAC2|INHA|PRNP|HSPD1|…	162	2.53564e-05
secretion (GO:0046903)	biological_process	P1	CAPN1|ILDR2|SIRPA|TVP23A|CCR1|SOX4|MVP|GSN|IRS1|CKAP4|PGAM1|CD200|ATP8A1|IMPDH2|NIBAN2|CD63|FGR|MAGED2|SLC25A4|KCNQ1|IL12B|TLN1|ACHE|PLEKHO2|ENHO|ANXA3|SLC38A2|ACSL4|ABCA1|GPR27|LRP5|PRKCA|RIMS3|RAB6A|RAB33B|APOA1|ELANE|PCSK6|GHDC|RHBDF1|CTSA|NPR1|ITGAV|NPY2R|BMP2|STEAP3|PRDX6|KLF7|NLGN2|CAMK2N1|GATA3|ERBB3|CD38|SYT1|ANO6|PYCARD|SLC8B1|ERBB4|NCOR2|RAC2|INHA|PLA2G1B|APOE|FRMD4A|ENDOD1|EDNRB|OLFM2|…	161	5.82153e-05
secretion by cell (GO:0032940)	biological_process	P1	CAPN1|ILDR2|SIRPA|TVP23A|CCR1|SOX4|MVP|GSN|IRS1|CKAP4|PGAM1|CD200|ATP8A1|IMPDH2|NIBAN2|CD63|FGR|MAGED2|SLC25A4|IL12B|TLN1|ACHE|PLEKHO2|ENHO|ANXA3|SLC38A2|ACSL4|ABCA1|GPR27|LRP5|PRKCA|RIMS3|RAB6A|RAB33B|APOA1|ELANE|PCSK6|GHDC|RHBDF1|CTSA|ITGAV|NPY2R|BMP2|STEAP3|PRDX6|KLF7|NLGN2|CAMK2N1|GATA3|CD38|SYT1|ANO6|PYCARD|SLC8B1|RAC2|INHA|PLA2G1B|APOE|FRMD4A|ENDOD1|OLFM2|NOS2|PPP3CA|ABCG1|ANG|CPNE3|SERPINB…	149	6.35976e-05
immune effector process (GO:0002252)	biological_process	P1	CAPN1|C6|SIRPA|PLCL2|IFITM2|KLRK1|IRF2|IFI6|MOV10|MVP|GSN|DLL1|MR1|CKAP4|PGAM1|ZC3HAV1|VSIG4|ATP8A1|IMPDH2|CD63|FGR|ACTB|IFI35|IL12B|LGALS1|ARRB2|CD28|PLEKHO2|ANXA3|TRIM56|RNASEL|PLSCR1|APBB1IP|IL10RB|RAB6A|NLRC5|RELB|EMP2|OAS1|APOA1|ELANE|GHDC|TICAM1|IFNE|SERINC5|CTSA|ITGAV|POLR3K|DOCK1|PRDX6|GATA3|IFIT3|ANO6|NFKBID|C1QA|PYCARD|RAC2|PLA2G1B|HSPD1|IFI16|C1QC|PIK3R1|NOTCH2|SMAD7|NOS2|BCL2|MSH6|PLD…	138	0.000998894
regulated exocytosis (GO:0045055)	biological_process	P1	CAPN1|SIRPA|MVP|GSN|CKAP4|PGAM1|ATP8A1|IMPDH2|CD63|FGR|MAGED2|TLN1|PLEKHO2|ANXA3|RIMS3|RAB6A|APOA1|ELANE|GHDC|CTSA|ITGAV|PRDX6|SYT1|ANO6|PYCARD|RAC2|ENDOD1|CPNE3|SERPINB1|HGSNAT|AMPD3|STK10|GIPC1|ACTR1B|VAT1|CDK5|RIMS4|VEGFA|CD9|SELL|GRN|VCL|RHOG|EEF1A1|RAB15|TRAPPC1|STX11|GAS6|SNAPIN|SYT2|PPIA|APRT|PDGFA|CHI3L1|SNCA|DSP|ANPEP|HUWE1|ALDOA|PROS1|B2M|SPARC|OTOF|CYB5R3|CD47|MYH9|CRHBP|ACTN4|GAB2|SYK…	86	0.00964972
positive regulation of protein kinase activity (GO:0045860)	biological_process	P1	ROBO1|RPS3|AJUBA|IL12B|INSR|CSF1R|EMP2|ELANE|NEDD9|TDGF1|BMP2|PRKAR2B|ERBB3|ARAF|PRNP|PLA2G1B|ANG|MAP3K21|ERBB2|EIF2AK2|MAP3K15|PKN1|FYN|CDK5|PLCE1|FLT3|ADORA1|ADCY6|TAOK3|VEGFA|NRK|RALB|PRDX2|GAS6|PPIA|IL6R|TGFBR2|PDGFA|CHI3L1|F2R|SNCA|MAPKAPK3|CXCR4|DDR2|MDFIC|GADD45G|AFAP1L2|IRAK2|FGF10|SYK|JTB|DAG1|GPRC5B|IGF2|RPLP1|CCND2|IQGAP1|TLR4|VLDLR|PRKAR1B|ATP2B4	61	0.0147994
positive regulation of MAPK cascade (GO:0043410)	biological_process	P1	CCR1|GSDME|ROBO1|IGFBP4|ANKRD6|IGF1R|SEMA4C|RPS3|BCAR3|AJUBA|ADRB3|INSR|DSTYK|ARRB2|PRKCA|CSF1R|ELANE|TDGF1|GLIPR2|BMP2|PYCARD|ERBB4|PLA2G1B|APOE|NOTCH2|RELL1|MAP3K21|ERBB2|EIF2AK2|PKN1|PLCE1|FLT3|TAOK3|VEGFA|PRDX2|GAS6|PPIA|PDGFA|SH3RF1|CHI3L1|F2R|MAPKAPK3|CXCR4|MDFIC|GADD45G|IRAK2|FGF10|SEMA7A|GATA4|ARL6IP5|SYK|IGF2|WWC1|LRP1|IQGAP1|TLR4|HIPK2|CDON|C1QTNF1|JCAD	60	0.0132933
positive regulation of intracellular signal transduction (GO:1902533)	biological_process	P1	BMF|CCDC22|CCR1|TRIM21|RHOC|GSDME|IRS1|ROBO1|IGFBP4|ARHGEF3|ANKRD6|IGF1R|SEMA4C|FGR|CXXC5|RPS3|BCAR3|AJUBA|IFI35|IL12B|ADRB3|INSR|LGALS1|DSTYK|ARRB2|CD28|CC2D1A|PRKCA|COL3A1|CSF1R|APOA1|ELANE|TICAM1|HIP1|NPR1|TDGF1|GLIPR2|BMP2|GATA3|ERBB3|RPL11|PYCARD|ERBB4|RAC2|MAPRE2|H19|PLA2G1B|APOE|PIK3R1|NOTCH2|F11R|SLC35B2|BCL2|RELL1|MAP3K21|ERBB2|EIF2AK2|NDFIP1|PKN1|FYN|FAM110C|PLCE1|FLT3|TAOK3|VEGFA|SHISA…	114	0.000276603
regulation of protein phosphorylation (GO:0001932)	biological_process	P1	EPHB2|PKIA|SIRPA|PLCL2|ZBED3|WWTR1|RGS4|PMEPA1|MVP|TFAP4|TRIB2|ROBO1|CDKN1B|HSPB1|BMPR2|IGF1R|FGR|TWIST1|RPS3|ACTB|BCAR3|YWHAB|AJUBA|IL12B|TRIB3|INSR|ARRB2|PPP2R1A|CAMKK2|LRP5|DAB2|CSF1R|EMP2|APOA1|ELANE|LIMCH1|IFNE|NEDD9|TDGF1|PARP14|BMP2|PRKAR2B|CAMK2N1|ERBB3|ARAF|PYCARD|ERBB4|BMPR1A|RAC2|INHA|PRNP|PLA2G1B|APOE|EDNRB|NHLRC1|KLHL31|SMAD7|BCL2|ANG|MAP3K21|ERBB2|EIF2AK2|MAP3K15|SOCS3|PKN1|RAPGEF3|…	134	0.000200514
positive regulation of signal transduction (GO:0009967)	biological_process	P1	BMF|CCDC22|CASP4|CCR1|ZBED3|SOX4|RGS4|TRIM21|RHOC|FGFBP3|CCBE1|GSDME|IRS1|DLL1|ROBO1|IGFBP4|PPP1CA|ARHGEF3|ANKRD6|BMPR2|IGF1R|SEMA4C|CD63|FGR|CXXC5|RPS3|BCAR3|MAML3|MAML1|COL1A1|AJUBA|IFI35|IL12B|ADRB3|INSR|LGALS1|DSTYK|ARRB2|CD28|ENHO|YAP1|GPR27|CC2D1A|PRKCA|NUCKS1|COL3A1|IL10RB|DAB2|CSF1R|LIMS2|NLRC5|SMAD3|EMP2|APOA1|ELANE|TICAM1|HIP1|NPR1|TDGF1|PARP14|GLIPR2|BMP2|NLGN2|LGR4|GATA3|ERBB3|TNFRSF1…	168	3.23004e-05
regulation of transferase activity (GO:0051338)	biological_process	P1	EPHB2|PKIA|WWTR1|RGS4|MVP|IRS1|TFAP4|CD200|TRIB2|INSRR|ROBO1|CDKN1B|HSPB1|IGF1R|FGR|RPS3|ACTB|YWHAB|AJUBA|IL12B|TRIB3|INSR|DSTYK|PPP2R1A|CAMKK2|LRP5|CSF1R|NLRC5|EMP2|ELANE|SERINC5|NEDD9|TDGF1|BMP2|PRKAR2B|EPHA2|CAMK2N1|ERBB3|ARAF|RPL11|PYCARD|ERBB4|RAC2|PRNP|PLA2G1B|APOE|NHLRC1|PIK3R1|SMAD7|ANG|MAP3K21|ERBB2|EIF2AK2|MAP3K15|SOCS3|DDR1|PKN1|FYN|CDK5|PLCE1|FLT3|ADORA1|ADCY6|TAOK3|VAV2|VEGFA|NRK|RAL…	116	0.000163327
positive regulation of protein modification process (GO:0031401)	biological_process	P1	NDN|SOX4|ROBO1|BMPR2|RPS3|BCAR3|TET1|AJUBA|IL12B|TRIB3|INSR|ARRB2|NAP1L2|CAMKK2|DAB2|CSF1R|EMP2|ELANE|LIMCH1|TICAM1|IFNE|NEDD9|TDGF1|PARP14|BMP2|PRKAR2B|GATA3|ERBB3|ARAF|ERBB4|BMPR1A|INHA|PRNP|PLA2G1B|EDNRB|NHLRC1|SMAD7|BCL2|ANG|FAM107A|MAP3K21|ERBB2|EIF2AK2|MAP3K15|SOCS3|NDFIP1|PKN1|RAPGEF3|FYN|CDK5|PLCE1|FLT3|ADORA1|ADCY6|TAOK3|VEGFA|NRK|RALB|PRKD1|SOX9|PRDX2|GAS6|GDF3|HES1|PPIA|IL6R|TNIP1|TGFB…	106	0.0264355
regulation of phosphorylation (GO:0042325)	biological_process	P1	EPHB2|PKIA|SIRPA|PLCL2|ZBED3|WWTR1|RGS4|PMEPA1|MVP|IRS1|TFAP4|PGAM1|TRIB2|INSRR|ROBO1|CDKN1B|HSPB1|BMPR2|IGF1R|FGR|TWIST1|RPS3|ACTB|BCAR3|YWHAB|AJUBA|IL12B|TRIB3|PPIF|INSR|DSTYK|ARRB2|PPP2R1A|CAMKK2|FBP1|LRP5|DAB2|CSF1R|NLRC5|EMP2|APOA1|ELANE|LIMCH1|IFNE|NEDD9|TDGF1|PARP14|BMP2|PRKAR2B|EPHA2|CAMK2N1|ERBB3|ARAF|PYCARD|ERBB4|BMPR1A|RAC2|INHA|PRNP|PLA2G1B|APOE|EDNRB|NHLRC1|KLHL31|PIK3R1|SMAD7|BCL2|A…	152	0.000156428
positive regulation of phosphate metabolic process (GO:0045937)	biological_process	P1	EPHB2|IRS1|INSRR|ROBO1|BMPR2|IGF1R|FGR|RPS3|BCAR3|AJUBA|IL12B|INSR|DSTYK|ARRB2|CAMKK2|DAB2|CSF1R|SMAD3|EMP2|ELANE|LIMCH1|IFNE|NEDD9|TDGF1|PARP14|BMP2|PRKAR2B|EPHA2|ERBB3|ARAF|ERBB4|BMPR1A|INHA|PRNP|PLA2G1B|EDNRB|NOS2|BCL2|ANG|MAP3K21|ERBB2|EIF2AK2|MAP3K15|SOCS3|DDR1|PKN1|RAPGEF3|ITGA2|FYN|CDK5|PLCE1|FLT3|ADORA1|ADCY6|ITGA6|TAOK3|VAV2|VEGFA|NRK|RALB|PRKD1|SOX9|MEF2C|ENO1|PRDX2|GAS6|GDF3|HES1|AXL|P…	108	0.00191827
positive regulation of phosphorus metabolic process (GO:0010562)	biological_process	P1	EPHB2|IRS1|INSRR|ROBO1|BMPR2|IGF1R|FGR|RPS3|BCAR3|AJUBA|IL12B|INSR|DSTYK|ARRB2|CAMKK2|DAB2|CSF1R|SMAD3|EMP2|ELANE|LIMCH1|IFNE|NEDD9|TDGF1|PARP14|BMP2|PRKAR2B|EPHA2|ERBB3|ARAF|ERBB4|BMPR1A|INHA|PRNP|PLA2G1B|EDNRB|NOS2|BCL2|ANG|MAP3K21|ERBB2|EIF2AK2|MAP3K15|SOCS3|DDR1|PKN1|RAPGEF3|ITGA2|FYN|CDK5|PLCE1|FLT3|ADORA1|ADCY6|ITGA6|TAOK3|VAV2|VEGFA|NRK|RALB|PRKD1|SOX9|MEF2C|ENO1|PRDX2|GAS6|GDF3|HES1|AXL|P…	108	0.00191827
protein phosphorylation (GO:0006468)	biological_process	P1	FAM20C|EPHB2|PKIA|SIRPA|PLCL2|ZBED3|WWTR1|RGS4|AMHR2|PMEPA1|MVP|TFAP4|TRIB2|INSRR|ROBO1|CDKN1B|HSPB1|NUAK2|BMPR2|IGF1R|FGR|TWIST1|RPS3|ACTB|BCAR3|DCLK1|MAML1|YWHAB|AJUBA|IL12B|TRIB3|INSR|DSTYK|ARRB2|SIK1|PPP2R1A|CAMKK2|RNASEL|SMAD5|LRP5|PRKCA|ALPK3|DAB2|CSF1R|HSPB8|EMP2|APOA1|ELANE|LIMCH1|IFNE|NEDD9|NPR1|TDGF1|PARP14|BMP2|SPEG|PRKAR2B|CDK6|EPHA2|CAMK2N1|ERBB3|ARAF|STK24|PYCARD|ERBB4|BMPR1A|RAC2|I…	173	8.0811e-05
regulation of phosphate metabolic process (GO:0019220)	biological_process	P1	EPHB2|PKIA|SIRPA|PLCL2|ZBED3|WWTR1|APOC1|RGS4|PMEPA1|MVP|IRS1|TFAP4|PGAM1|TRIB2|INSRR|ROBO1|CDKN1B|HSPB1|BMPR2|IGF1R|FGR|TWIST1|RPS3|ACTB|BCAR3|YWHAB|PPP1R26|AJUBA|IL12B|TRIB3|PPIF|INSR|DSTYK|ARRB2|PPP2R1A|CAMKK2|FBP1|LRP5|DAB2|CSF1R|NLRC5|SMAD3|EMP2|APOA1|ELANE|LIMCH1|IFNE|NEDD9|TDGF1|PARP14|BMP2|PRKAR2B|EPHA2|CAMK2N1|ERBB3|ARAF|PPP1R1A|PYCARD|ERBB4|BMPR1A|RAC2|INHA|H19|PRNP|PLA2G1B|APOE|EDNRB|N…	170	0.000189085
regulation of phosphorus metabolic process (GO:0051174)	biological_process	P1	EPHB2|PKIA|SIRPA|PLCL2|ZBED3|WWTR1|APOC1|RGS4|PMEPA1|MVP|IRS1|TFAP4|PGAM1|TRIB2|INSRR|ROBO1|CDKN1B|HSPB1|BMPR2|IGF1R|FGR|TWIST1|RPS3|ACTB|BCAR3|YWHAB|PPP1R26|AJUBA|IL12B|TRIB3|PPIF|INSR|DSTYK|ARRB2|PPP2R1A|CAMKK2|FBP1|LRP5|DAB2|CSF1R|NLRC5|SMAD3|EMP2|APOA1|ELANE|LIMCH1|IFNE|NEDD9|TDGF1|PARP14|BMP2|PRKAR2B|EPHA2|CAMK2N1|ERBB3|ARAF|PPP1R1A|PYCARD|ERBB4|BMPR1A|RAC2|INHA|H19|PRNP|PLA2G1B|APOE|EDNRB|N…	170	0.000189085
positive regulation of signaling (GO:0023056)	biological_process	P1	BMF|CCDC22|EPHB2|CASP4|CCR1|ZBED3|SOX4|RGS4|TRIM21|RHOC|FGFBP3|CCBE1|GSDME|IRS1|DLL1|ROBO1|IGFBP4|PPP1CA|ARHGEF3|ANKRD6|BMPR2|IGF1R|SEMA4C|CD63|FGR|CXXC5|RPS3|BCAR3|MAML3|MAML1|COL1A1|AJUBA|IFI35|IL12B|ADRB3|INSR|LGALS1|DSTYK|ARRB2|CD28|ENHO|ACSL4|YAP1|GPR27|CC2D1A|PRKCA|NUCKS1|RIMS3|COL3A1|IL10RB|DAB2|CSF1R|LIMS2|NLRC5|SMAD3|EMP2|APOA1|ELANE|TICAM1|HIP1|LAMA2|NPR1|TDGF1|PARP14|GLIPR2|BMP2|NLGN2|…	184	2.75564e-05
positive regulation of cell communication (GO:0010647)	biological_process	P1	BMF|CCDC22|EPHB2|CASP4|CCR1|ZBED3|SOX4|RGS4|TRIM21|RHOC|FGFBP3|CCBE1|GSDME|IRS1|DLL1|ROBO1|IGFBP4|PPP1CA|ARHGEF3|ANKRD6|BMPR2|IGF1R|SEMA4C|CD63|FGR|CXXC5|RPS3|BCAR3|MAML3|MAML1|COL1A1|AJUBA|IFI35|IL12B|ADRB3|INSR|LGALS1|DSTYK|ARRB2|CD28|ENHO|ACSL4|YAP1|GPR27|CC2D1A|PRKCA|NUCKS1|RIMS3|COL3A1|IL10RB|DAB2|CSF1R|LIMS2|NLRC5|SMAD3|EMP2|APOA1|ELANE|TICAM1|HIP1|LAMA2|NPR1|TDGF1|PARP14|GLIPR2|BMP2|NLGN2|…	183	3.16328e-05
positive regulation of cellular protein metabolic process (GO:0032270)	biological_process	P1	NDN|CCDC22|VGLL4|OSBPL7|SOX4|CCBE1|MSN|GSN|TFAP4|UBQLN2|TRIB2|ROBO1|BMPR2|RPS3|BCAR3|TET1|AJUBA|IL12B|TRIB3|INSR|ARRB2|CD28|NAP1L2|CAMKK2|RDX|DAB2|MAGEF1|CSF1R|USP13|SMAD3|EMP2|ELANE|LIMCH1|TICAM1|IFNE|NEDD9|LARP6|HIP1|RPS4X|TDGF1|PARP14|BMP2|PRKAR2B|GATA3|ERBB3|ARAF|PYCARD|ERBB4|MTCH1|ANTXR1|BMPR1A|INHA|PRNP|PLA2G1B|HSPD1|APOE|IFI16|EDNRB|NHLRC1|SMAD7|BCL2|ANG|DET1|FAM107A|MAP3K21|ERBB2|EIF2AK2|…	156	0.000160927
regulation of kinase activity (GO:0043549)	biological_process	P1	EPHB2|PKIA|WWTR1|RGS4|MVP|IRS1|TFAP4|TRIB2|INSRR|ROBO1|CDKN1B|HSPB1|IGF1R|FGR|RPS3|ACTB|YWHAB|AJUBA|IL12B|TRIB3|INSR|DSTYK|PPP2R1A|CAMKK2|LRP5|CSF1R|NLRC5|EMP2|ELANE|NEDD9|TDGF1|BMP2|PRKAR2B|EPHA2|CAMK2N1|ERBB3|ARAF|PYCARD|ERBB4|RAC2|PRNP|PLA2G1B|APOE|NHLRC1|PIK3R1|ANG|MAP3K21|ERBB2|EIF2AK2|MAP3K15|SOCS3|DDR1|PKN1|FYN|CDK5|PLCE1|FLT3|ADORA1|ADCY6|TAOK3|VAV2|VEGFA|NRK|RALB|PRKD1|EEF1A1|CDK4|PRDX2|…	106	0.000176883
positive regulation of response to stimulus (GO:0048584)	biological_process	P1	BMF|CCDC22|C6|CASP4|CCR1|PLCL2|ZBED3|KLRK1|SOX4|RGS4|TRIM21|RHOC|FGFBP3|CCBE1|GSDME|IRS1|UBQLN2|THEMIS2|DLL1|MR1|PLA2G7|ROBO1|IGFBP4|PPP1CA|VSIG4|ARHGEF3|HSPB1|ANKRD6|BMPR2|IGF1R|SEMA4C|CD63|FGR|CXXC5|TRPC3|RPS3|ACTB|BCAR3|MAML3|MAML1|COL1A1|NONO|AJUBA|IFI35|IL12B|ADRB3|INSR|LGALS1|DSTYK|ARRB2|CD28|ENHO|YAP1|PLSCR1|ETS1|GPR27|CC2D1A|PRKCA|NUCKS1|COL3A1|IL10RB|DAB2|CSF1R|LIMS2|NLRC5|RELB|USP13|SMA…	225	0.000347324
positive regulation of protein metabolic process (GO:0051247)	biological_process	P1	NDN|CCDC22|VGLL4|OSBPL7|SOX4|CCBE1|MSN|GSN|TFAP4|UBQLN2|TRIB2|ROBO1|CDKN1B|BMPR2|RPS3|BCAR3|TET1|AJUBA|IL12B|TRIB3|INSR|ARRB2|CD28|NAP1L2|CAMKK2|RDX|DAB2|MAGEF1|CSF1R|USP13|SMAD3|EMP2|ELANE|LIMCH1|TICAM1|IFNE|NEDD9|LARP6|HIP1|RPS4X|TDGF1|PARP14|BMP2|PRKAR2B|GATA3|ERBB3|ARAF|APC2|PYCARD|ERBB4|MTCH1|ANTXR1|BMPR1A|INHA|PRNP|PLA2G1B|HSPD1|APOE|IFI16|EDNRB|NHLRC1|SMAD7|BCL2|ABCG1|ANG|DET1|FAM107A|MAP3…	160	0.000533639
positive regulation of kinase activity (GO:0033674)	biological_process	P1	EPHB2|IRS1|INSRR|ROBO1|IGF1R|FGR|RPS3|AJUBA|IL12B|INSR|DSTYK|CSF1R|EMP2|ELANE|NEDD9|TDGF1|BMP2|PRKAR2B|EPHA2|ERBB3|ARAF|ERBB4|PRNP|PLA2G1B|ANG|MAP3K21|ERBB2|EIF2AK2|MAP3K15|DDR1|PKN1|FYN|CDK5|PLCE1|FLT3|ADORA1|ADCY6|TAOK3|VAV2|VEGFA|NRK|RALB|PRKD1|PRDX2|GAS6|AXL|PPIA|IL6R|TGFBR2|PDGFA|CHI3L1|EPHA7|F2R|SNCA|MAPKAPK3|CXCR4|DDR2|MDFIC|GADD45G|AFAP1L2|IRAK2|FGF10|EPHB3|SYK|JTB|DAG1|GPRC5B|IGF2|RPLP1|…	75	0.000643737
phosphorylation (GO:0016310)	biological_process	P1	FAM20C|EPHB2|ATP5MC2|PKIA|SIRPA|PLCL2|ZBED3|WWTR1|RGS4|AMHR2|PMEPA1|PAPSS1|MVP|IRS1|TFAP4|PGAM1|TRIB2|INSRR|ROBO1|CDKN1B|HSPB1|NUAK2|BMPR2|IGF1R|FGR|TWIST1|UCK2|RPS3|ACTB|BCAR3|DCLK1|MAML1|YWHAB|AJUBA|IL12B|TRIB3|PPIF|UQCRHL|INSR|DSTYK|ARRB2|SIK1|PPP2R1A|CAMKK2|RNASEL|FBP1|SMAD5|LRP5|PRKCA|NDUFS5|ALPK3|DAB2|CSF1R|HSPB8|NLRC5|EMP2|APOA1|ELANE|LIMCH1|NDUFB7|IFNE|NEDD9|NPR1|TDGF1|PARP14|NDUFA1|BMP2|…	204	0.000998894
positive regulation of phosphorylation (GO:0042327)	biological_process	P1	EPHB2|IRS1|INSRR|ROBO1|BMPR2|IGF1R|FGR|RPS3|BCAR3|AJUBA|IL12B|INSR|DSTYK|ARRB2|CAMKK2|DAB2|CSF1R|EMP2|ELANE|LIMCH1|IFNE|NEDD9|TDGF1|PARP14|BMP2|PRKAR2B|EPHA2|ERBB3|ARAF|ERBB4|BMPR1A|INHA|PRNP|PLA2G1B|EDNRB|BCL2|ANG|MAP3K21|ERBB2|EIF2AK2|MAP3K15|SOCS3|DDR1|PKN1|RAPGEF3|FYN|CDK5|PLCE1|FLT3|ADORA1|ADCY6|ITGA6|TAOK3|VAV2|VEGFA|NRK|RALB|PRKD1|SOX9|PRDX2|GAS6|GDF3|HES1|AXL|PPIA|IL6R|TGFBR2|PDGFA|CHI3L1…	103	0.00103569
positive regulation of transferase activity (GO:0051347)	biological_process	P1	EPHB2|IRS1|CD200|INSRR|ROBO1|IGF1R|FGR|RPS3|AJUBA|IL12B|TRIB3|INSR|DSTYK|CSF1R|EMP2|ELANE|SERINC5|NEDD9|TDGF1|BMP2|PRKAR2B|EPHA2|ERBB3|ARAF|ERBB4|PRNP|PLA2G1B|ANG|MAP3K21|ERBB2|EIF2AK2|MAP3K15|DDR1|PKN1|FYN|CDK5|PLCE1|FLT3|ADORA1|ADCY6|TAOK3|VAV2|VEGFA|NRK|RALB|PRKD1|PRDX2|GAS6|AXL|PPIA|IL6R|TGFBR2|PDGFA|CHI3L1|EPHA7|F2R|SNCA|MAPKAPK3|CXCR4|DDR2|MDFIC|GADD45G|AFAP1L2|IRAK2|SERINC1|FGF10|DTX3L|EPH…	81	0.00133296
regulation of protein kinase activity (GO:0045859)	biological_process	P1	EPHB2|PKIA|WWTR1|RGS4|MVP|TFAP4|TRIB2|ROBO1|CDKN1B|HSPB1|IGF1R|FGR|RPS3|ACTB|YWHAB|AJUBA|IL12B|TRIB3|INSR|PPP2R1A|CAMKK2|LRP5|CSF1R|EMP2|ELANE|NEDD9|TDGF1|BMP2|PRKAR2B|CAMK2N1|ERBB3|ARAF|PYCARD|RAC2|PRNP|PLA2G1B|APOE|NHLRC1|ANG|MAP3K21|ERBB2|EIF2AK2|MAP3K15|SOCS3|PKN1|FYN|CDK5|PLCE1|FLT3|ADORA1|ADCY6|TAOK3|VEGFA|NRK|RALB|CDK4|PRDX2|GAS6|PPIA|IL6R|TGFBR2|PDGFA|CHI3L1|F2R|SNCA|MAPKAPK3|CXCR4|DDR2|M…	91	0.00141809
regulation of protein modification process (GO:0031399)	biological_process	P1	NDN|EPHB2|PKIA|SIRPA|PLCL2|ZBED3|SOX4|WWTR1|RGS4|TRIM21|PMEPA1|MVP|TFAP4|TRIB2|ROBO1|CDKN1B|HSPB1|BMPR2|IGF1R|FGR|TWIST1|EID1|RPS3|ACTB|BCAR3|TET1|YWHAB|PPP1R26|AJUBA|PYGO2|IL12B|TRIB3|INSR|ARRB2|PPP2R1A|NAP1L2|CAMKK2|LRP5|DAB2|CSF1R|EMP2|APOA1|ELANE|LIMCH1|TICAM1|IFNE|NEDD9|TDGF1|PARP14|BMP2|PRKAR2B|CAMK2N1|GATA3|ERBB3|ARAF|PPP1R1A|RPL11|PYCARD|ERBB4|BMPR1A|RAC2|INHA|PRNP|PLA2G1B|APOE|ZMIZ1|EPAS…	165	0.00165601
MAPK cascade (GO:0000165)	biological_process	P1	SEMA6A|EPHB2|SIRPA|CCR1|RGS4|GSDME|IRS1|ROBO1|IGFBP4|ANKRD6|IGF1R|SEMA4C|RPS3|BCAR3|YWHAB|AJUBA|ADRB3|INSR|DSTYK|ARRB2|PPP2R1A|CAMKK2|PRKCA|ZFP36L2|CSF1R|ELANE|ZFP36L1|TDGF1|ITGAV|GLIPR2|BMP2|EPHA2|CAMK2N1|ERBB3|ARAF|PYCARD|ERBB4|PLA2G1B|APOE|PEBP1|RASAL1|KLHL31|NOTCH2|RELL1|MAP3K21|MAPK4|ERBB2|EIF2AK2|MAP3K15|NRTN|PKN1|FYN|PLCE1|FLT3|TAOK3|VEGFA|NRK|CILK1|SOX9|MEF2C|PRDX2|ATF3|GAS6|PPIA|TNIP1|PD…	98	0.0051104
positive regulation of protein phosphorylation (GO:0001934)	biological_process	P1	ROBO1|BMPR2|RPS3|BCAR3|AJUBA|IL12B|INSR|ARRB2|CAMKK2|DAB2|CSF1R|EMP2|ELANE|LIMCH1|IFNE|NEDD9|TDGF1|PARP14|BMP2|PRKAR2B|ERBB3|ARAF|ERBB4|BMPR1A|INHA|PRNP|PLA2G1B|EDNRB|BCL2|ANG|MAP3K21|ERBB2|EIF2AK2|MAP3K15|SOCS3|PKN1|RAPGEF3|FYN|CDK5|PLCE1|FLT3|ADORA1|ADCY6|TAOK3|VEGFA|NRK|RALB|PRKD1|SOX9|PRDX2|GAS6|GDF3|HES1|PPIA|IL6R|TGFBR2|PDGFA|CHI3L1|EPHA7|F2R|SNCA|MAPKAPK3|CXCR4|DDR2|MDFIC|GADD45G|AFAP1L2|I…	90	0.00758911
regulation of MAPK cascade (GO:0043408)	biological_process	P1	SEMA6A|EPHB2|SIRPA|CCR1|RGS4|GSDME|ROBO1|IGFBP4|ANKRD6|IGF1R|SEMA4C|RPS3|BCAR3|AJUBA|ADRB3|INSR|DSTYK|ARRB2|PPP2R1A|PRKCA|CSF1R|ELANE|TDGF1|GLIPR2|BMP2|EPHA2|CAMK2N1|PYCARD|ERBB4|PLA2G1B|APOE|PEBP1|KLHL31|NOTCH2|RELL1|MAP3K21|ERBB2|EIF2AK2|PKN1|PLCE1|FLT3|TAOK3|VEGFA|PRDX2|ATF3|GAS6|PPIA|TNIP1|PDGFA|SH3RF1|CHI3L1|EPHA7|F2R|MAPKAPK3|CXCR4|MDFIC|GADD45G|IRAK2|FGF10|SEMA7A|GATA4|MIR503|EMILIN1|ARL6I…	78	0.00781821
positive regulation of cellular component organization (GO:0051130)	biological_process	P1	BMF|EPHB2|RHOC|MSN|GSN|PLEK2|DLL1|ROBO1|ATP8A1|BMPR2|IGF1R|CD63|RPS3|TET1|YWHAB|HAS3|YWHAH|AJUBA|PPIF|COLGALT1|INSR|PFN1|ARRB2|CD28|NAP1L2|CAMKK2|ABCA1|HNRNPA1|LRP5|NEGR1|DAB2|FZD1|SMAD3|APOA1|LIMCH1|VDAC1|HIP1|TWF2|SERPINF1|BMP2|SH3GL1|CDC42EP4|HRK|NLGN2|MGARP|EPHA2|GATA3|SYT1|DPYSL3|ANO6|PYCARD|RAC2|MAPRE2|APOE|ARHGEF10L|PIK3R1|PDPN|BCL2|PPP3CA|NAV3|SLITRK6|PLXNA1|NES|OBSL1|RAPGEF3|ITGA2|FYN|CD…	131	3.45617e-05
cell population proliferation (GO:0008283)	biological_process	P1	NDN|CAPN1|VGLL4|DDAH1|PLCL2|SOX4|WWTR1|PTPN14|MMP2|IRF2|TNN|MSN|GSDME|IRS1|TFAP4|DLL1|CD200|ROBO1|ZNRF3|IGFBP4|CDKN1B|VSIG4|BMPR2|IGF1R|NIBAN2|GLI2|PTPRZ1|TWIST1|RPS3|TET1|FOXJ2|FAT4|IFI35|PYGO2|IL12B|INSR|CD28|PDF|GATA6|YAP1|ETS1|LRP5|DEAF1|PRKCA|STAT6|CSF1R|LIMS2|CHST11|USP13|RNF43|SMAD3|EMP2|APOA1|ELANE|TICAM1|IFNE|P3H2|RHBDF1|RPS4X|ZFP36L1|NPR1|TDGF1|ITGAV|SERPINF1|WT1|BMP2|CNTFR|SPEG|CDK6|LG…	203	3.59846e-05
regulation of cell population proliferation (GO:0042127)	biological_process	P1	NDN|CAPN1|VGLL4|DDAH1|SOX4|WWTR1|PTPN14|MMP2|TNN|GSDME|IRS1|TFAP4|DLL1|CD200|ROBO1|CDKN1B|VSIG4|BMPR2|IGF1R|NIBAN2|GLI2|PTPRZ1|TWIST1|RPS3|TET1|FOXJ2|IFI35|PYGO2|IL12B|INSR|CD28|PDF|GATA6|YAP1|ETS1|LRP5|DEAF1|PRKCA|STAT6|CSF1R|LIMS2|CHST11|SMAD3|EMP2|ELANE|TICAM1|P3H2|RPS4X|ZFP36L1|NPR1|TDGF1|ITGAV|SERPINF1|WT1|BMP2|CNTFR|SPEG|CDK6|SH3BP4|CAMK2N1|GATA3|ERBB3|CD38|IFIT3|TNFSF13B|PYCARD|ERBB4|MTSS1…	175	0.000175658
regulation of anion transport (GO:0044070)	biological_process	P1	CDH1|PKIA|SOX4|APOC1|RGS4|PTPN14|IRS1|CD200|ATP8A1|OPN3|ACTB|SLC25A4|YWHAB|YWHAH|IL12B|TRIB3|INSR|ACHE|ENHO|ACSL4|RNASEL|ABCA1|GPR27|LRP5|PRKCA|SMAD3|APOA1|RHBDF1|NUCB1|ITGAV|NPY2R|OPHN1|KLF7|NLGN2|CAMK2N1|CD38|SYT1|SLC8B1|RAC2|PRNP|PLA2G1B|APOE|FRMD4A|ABCA8|PIK3R1|NOS2|BCL2|PPP3CA|ABCG1|ANG|ERBB2|EDEM2|NDFIP1|RAPGEF3|FYN|CDK5|ADORA1|SREBF2|FERMT1|GAS6|SYT2|PPIA|F2R|SNCA|NFE2L2|HUWE1|MDFIC|NKX3-1…	89	0.0239062
regulation of ion transport (GO:0043269)	biological_process	P1	CAPN1|CDH1|EPHB2|PKIA|CCR1|SOX4|APOC1|KCNJ5|RGS4|PTPN14|IRS1|CD200|SCN9A|ATP8A1|CD63|OPN3|TWIST1|TRPC3|ACTB|LRRC38|SLC25A4|ATP1B1|YWHAB|YWHAH|KCNQ1|IL12B|TRIB3|PPIF|INSR|ACHE|ARRB2|ENHO|SIK1|ACSL4|RNASEL|ABCA1|GPR27|LRP5|GNB5|PRKCA|SMAD3|APOA1|GLRX|KCNF1|VDAC1|RHBDF1|NUCB1|ITGAV|NPY2R|OPHN1|KLF7|NLGN2|KCNC4|CAMK2N1|CD38|SYT1|ANO6|SLC8B1|RAC2|TSPAN13|PRNP|PLA2G1B|JPH4|APOE|FRMD4A|ABCA8|PIK3R1|NOS2…	137	0.00237379
positive regulation of anion transport (GO:1903793)	biological_process	P1	CDH1|SOX4|IRS1|ATP8A1|OPN3|ACTB|YWHAB|YWHAH|INSR|ACHE|ACSL4|RNASEL|ABCA1|GPR27|SMAD3|APOA1|NPY2R|NLGN2|CAMK2N1|CD38|SYT1|RAC2|PRNP|PLA2G1B|APOE|FRMD4A|ABCA8|PIK3R1|BCL2|ABCG1|ANG|ERBB2|EDEM2|RAPGEF3|FYN|CDK5|ADORA1|SREBF2|GAS6|PPIA|NFE2L2|HUWE1|NKX3-1|MIEF2|APPL1|OXTR|CLIP3|TP53|TCAF1|CXCL12|LRP1|RAB3B|TLR4|NFKBIA|C1QTNF1|RAC1	56	0.0216832
regulation of transport (GO:0051049)	biological_process	P1	CAPN1|CDH1|EPHB2|PKIA|SIRPA|CCR1|SOX4|APOC1|KCNJ5|RGS4|PTPN14|MSN|RAB17|IRS1|UBQLN2|DLL1|CD200|SCN9A|ATP8A1|CD63|OPN3|FGR|TWIST1|TRPC3|ACTB|LRRC38|SLC25A4|ATP1B1|YWHAB|YWHAH|KCNQ1|IL12B|TRIB3|PPIF|INSR|ACHE|ARRB2|ENHO|SIK1|REEP2|ACSL4|RNASEL|PLSCR1|ABCA1|GPR27|LRP5|GNB5|PRKCA|RIMS3|RDX|DAB2|RAB33B|SMAD3|APOA1|GLRX|KCNF1|VDAC1|RHBDF1|HIP1|NUCB1|NPR1|ITGAV|NPY2R|BMP2|SH3GL1|OPHN1|KLF7|NLGN2|KCNC4|C…	185	4.99738e-05
positive regulation of transport (GO:0051050)	biological_process	P1	CDH1|EPHB2|SIRPA|CCR1|SOX4|MSN|IRS1|DLL1|ATP8A1|CD63|OPN3|FGR|TRPC3|ACTB|LRRC38|ATP1B1|YWHAB|YWHAH|KCNQ1|INSR|ACHE|ARRB2|ACSL4|RNASEL|ABCA1|GPR27|RDX|DAB2|SMAD3|APOA1|GLRX|HIP1|NPR1|NPY2R|BMP2|SH3GL1|NLGN2|CAMK2N1|CD38|SYT1|ANO6|PYCARD|RAC2|INHA|PRNP|PLA2G1B|APOE|FRMD4A|EDNRB|ABCA8|PIK3R1|BCL2|PPP3CA|ABCG1|ANG|ERBB2|EDEM2|STIM2|RAPGEF3|ITGA2|FYN|CDK5|ADORA1|SREBF2|VEGFA|RAB15|RGS9|GSTO1|GAS6|SNAP…	107	6.78452e-05
positive regulation of ion transport (GO:0043270)	biological_process	P1	CDH1|EPHB2|CCR1|SOX4|IRS1|ATP8A1|OPN3|TRPC3|ACTB|LRRC38|ATP1B1|YWHAB|YWHAH|KCNQ1|INSR|ACHE|ARRB2|ACSL4|RNASEL|ABCA1|GPR27|SMAD3|APOA1|GLRX|NPY2R|NLGN2|CAMK2N1|CD38|SYT1|ANO6|RAC2|PRNP|PLA2G1B|APOE|FRMD4A|ABCA8|PIK3R1|BCL2|ABCG1|ANG|ERBB2|EDEM2|STIM2|RAPGEF3|FYN|CDK5|ADORA1|SREBF2|RGS9|GSTO1|GAS6|PPIA|F2R|SNCA|NFE2L2|HUWE1|NKX3-1|MIEF2|APPL1|OXTR|ACTN4|CLIP3|TP53|DMD|TCAF1|STC1|CXCL12|P2RX7|BAX|LR…	75	0.00840262
regulation of secretion (GO:0051046)	biological_process	P1	SOX4|IRS1|CD200|FGR|SLC25A4|KCNQ1|IL12B|ACHE|ENHO|ACSL4|GPR27|LRP5|PRKCA|RIMS3|RAB33B|RHBDF1|NPR1|NPY2R|BMP2|KLF7|NLGN2|CAMK2N1|ERBB3|CD38|SYT1|SLC8B1|RAC2|INHA|PLA2G1B|APOE|FRMD4A|EDNRB|NOS2|PPP3CA|ABCG1|ANG|GIPC1|RAPGEF3|CDK5|RIMS4|ADORA1|MEF2C|RAB15|SNAPIN|SYT2|PPIA|F2R|SNCA|SOX11|FGF10|NKX3-1|OXTR|CRHBP|GAB2|SYK|STC1|CXCL12|PAM|SCAMP5|CPT1A|INHBB|LRP1|RAB3B|SYT11|TLR4|C1QTNF1|RAC1	67	0.0341457
negative regulation of nucleobase-containing compound metabolic process (GO:0045934)	biological_process	P1	NDN|ZNF219|VGLL4|PATZ1|PKIA|H1-0|PHF6|WWTR1|ZFHX3|IRF2|TCF21|H1-10|THAP11|TFAP4|TSC22D4|CDKN1B|BMPR2|NIBAN2|GLI2|DPF3|TWIST1|EID1|CXXC5|RPS3|TET1|NFIC|YWHAB|NONO|NKX6-3|AJUBA|TRIB3|KDM4A|SOX13|KLF3|BCL7A|GATA6|YAP1|FBP1|ZNF536|HNRNPA1|SMAD5|CC2D1A|DEAF1|DAB2|MAGEF1|CBX4|BEND6|RELB|SMAD3|ARID5B|ELANE|RPS13|NCOA2|ZEB2|TCF23|PARP14|WT1|NKRF|BMP2|MSC|ZNF69|KLF7|LGR4|GATA3|CD38|NCOR2|CCDC85B|CBX6|H19|…	154	0.00145118
negative regulation of biosynthetic process (GO:0009890)	biological_process	P1	NDN|ZNF219|VGLL4|PATZ1|PKIA|SIRPA|H1-0|PHF6|WWTR1|APOC1|ZFHX3|IRF2|TCF21|MOV10|CCDC3|H1-10|THAP11|TFAP4|TSC22D4|CDKN1B|BMPR2|NIBAN2|OPN3|GLI2|DPF3|TWIST1|EID1|CXXC5|RPS3|TET1|NFIC|YWHAB|NONO|NKX6-3|AJUBA|TRIB3|KDM4A|SOX13|ENHO|SIK1|KLF3|BCL7A|GATA6|YAP1|FBP1|ZNF536|HNRNPA1|SMAD5|CC2D1A|DEAF1|ZFP36L2|DAB2|CBX4|BEND6|RELB|SMAD3|ARID5B|ELANE|NCOA2|ZEB2|ZFP36L1|TCF23|GRB7|PARP14|WT1|NKRF|BMP2|MSC|ZNF…	177	5.27921e-05
negative regulation of cellular biosynthetic process (GO:0031327)	biological_process	P1	NDN|ZNF219|VGLL4|PATZ1|PKIA|SIRPA|H1-0|PHF6|WWTR1|APOC1|ZFHX3|IRF2|TCF21|MOV10|H1-10|THAP11|TFAP4|TSC22D4|CDKN1B|BMPR2|NIBAN2|OPN3|GLI2|DPF3|TWIST1|EID1|CXXC5|RPS3|TET1|NFIC|YWHAB|NONO|NKX6-3|AJUBA|TRIB3|KDM4A|SOX13|SIK1|KLF3|BCL7A|GATA6|YAP1|FBP1|ZNF536|HNRNPA1|SMAD5|CC2D1A|DEAF1|ZFP36L2|DAB2|CBX4|BEND6|RELB|SMAD3|ARID5B|ELANE|NCOA2|ZEB2|ZFP36L1|TCF23|GRB7|PARP14|WT1|NKRF|BMP2|MSC|ZNF69|KLF7|LGR…	171	0.000183946
negative regulation of transcription, DNA-templated (GO:0045892)	biological_process	P1	NDN|ZNF219|VGLL4|PATZ1|PKIA|H1-0|PHF6|WWTR1|ZFHX3|IRF2|TCF21|H1-10|THAP11|TFAP4|TSC22D4|CDKN1B|NIBAN2|GLI2|DPF3|TWIST1|EID1|CXXC5|TET1|NFIC|YWHAB|NONO|NKX6-3|AJUBA|TRIB3|KDM4A|SOX13|KLF3|BCL7A|GATA6|YAP1|FBP1|ZNF536|SMAD5|CC2D1A|DEAF1|DAB2|CBX4|BEND6|RELB|SMAD3|ARID5B|ELANE|NCOA2|ZEB2|TCF23|PARP14|WT1|NKRF|BMP2|MSC|ZNF69|KLF7|LGR4|GATA3|CD38|NCOR2|CCDC85B|CBX6|PEG3|TLE2|IFI16|SRY|RBBP7|EDNRB|LOXL…	141	0.000189085
negative regulation of nucleic acid-templated transcription (GO:1903507)	biological_process	P1	NDN|ZNF219|VGLL4|PATZ1|PKIA|H1-0|PHF6|WWTR1|ZFHX3|IRF2|TCF21|H1-10|THAP11|TFAP4|TSC22D4|CDKN1B|NIBAN2|GLI2|DPF3|TWIST1|EID1|CXXC5|TET1|NFIC|YWHAB|NONO|NKX6-3|AJUBA|TRIB3|KDM4A|SOX13|KLF3|BCL7A|GATA6|YAP1|FBP1|ZNF536|SMAD5|CC2D1A|DEAF1|DAB2|CBX4|BEND6|RELB|SMAD3|ARID5B|ELANE|NCOA2|ZEB2|TCF23|PARP14|WT1|NKRF|BMP2|MSC|ZNF69|KLF7|LGR4|GATA3|CD38|NCOR2|CCDC85B|CBX6|PEG3|TLE2|IFI16|SRY|RBBP7|EDNRB|LOXL…	141	0.000201074
negative regulation of RNA biosynthetic process (GO:1902679)	biological_process	P1	NDN|ZNF219|VGLL4|PATZ1|PKIA|H1-0|PHF6|WWTR1|ZFHX3|IRF2|TCF21|H1-10|THAP11|TFAP4|TSC22D4|CDKN1B|NIBAN2|GLI2|DPF3|TWIST1|EID1|CXXC5|TET1|NFIC|YWHAB|NONO|NKX6-3|AJUBA|TRIB3|KDM4A|SOX13|KLF3|BCL7A|GATA6|YAP1|FBP1|ZNF536|SMAD5|CC2D1A|DEAF1|DAB2|CBX4|BEND6|RELB|SMAD3|ARID5B|ELANE|NCOA2|ZEB2|TCF23|PARP14|WT1|NKRF|BMP2|MSC|ZNF69|KLF7|LGR4|GATA3|CD38|NCOR2|CCDC85B|CBX6|PEG3|TLE2|IFI16|SRY|RBBP7|EDNRB|LOXL…	141	0.000214993
negative regulation of macromolecule biosynthetic process (GO:0010558)	biological_process	P1	NDN|ZNF219|VGLL4|PATZ1|PKIA|H1-0|PHF6|WWTR1|ZFHX3|IRF2|TCF21|MOV10|H1-10|THAP11|TFAP4|TSC22D4|CDKN1B|BMPR2|NIBAN2|GLI2|DPF3|TWIST1|EID1|CXXC5|RPS3|TET1|NFIC|YWHAB|NONO|NKX6-3|AJUBA|TRIB3|KDM4A|SOX13|KLF3|BCL7A|GATA6|YAP1|FBP1|ZNF536|HNRNPA1|SMAD5|CC2D1A|DEAF1|ZFP36L2|DAB2|CBX4|BEND6|RELB|SMAD3|ARID5B|ELANE|NCOA2|ZEB2|ZFP36L1|TCF23|GRB7|PARP14|WT1|NKRF|BMP2|MSC|ZNF69|KLF7|LGR4|GATA3|CD38|NCOR2|CCD…	160	0.00120635
negative regulation of cellular macromolecule biosynthetic process (GO:2000113)	biological_process	P1	NDN|ZNF219|VGLL4|PATZ1|PKIA|H1-0|PHF6|WWTR1|ZFHX3|IRF2|TCF21|MOV10|H1-10|THAP11|TFAP4|TSC22D4|CDKN1B|BMPR2|NIBAN2|GLI2|DPF3|TWIST1|EID1|CXXC5|RPS3|TET1|NFIC|YWHAB|NONO|NKX6-3|AJUBA|TRIB3|KDM4A|SOX13|KLF3|BCL7A|GATA6|YAP1|FBP1|ZNF536|HNRNPA1|SMAD5|CC2D1A|DEAF1|ZFP36L2|DAB2|CBX4|BEND6|RELB|SMAD3|ARID5B|ELANE|NCOA2|ZEB2|ZFP36L1|TCF23|GRB7|PARP14|WT1|NKRF|BMP2|MSC|ZNF69|KLF7|LGR4|GATA3|CD38|NCOR2|CCD…	159	0.00121233
negative regulation of transcription by RNA polymerase II (GO:0000122)	biological_process	P1	NDN|ZNF219|PATZ1|PKIA|H1-0|PHF6|WWTR1|ZFHX3|IRF2|TCF21|THAP11|GLI2|TWIST1|EID1|CXXC5|NFIC|NKX6-3|AJUBA|TRIB3|SOX13|KLF3|GATA6|YAP1|FBP1|ZNF536|SMAD5|CC2D1A|DEAF1|DAB2|CBX4|SMAD3|ARID5B|ELANE|NCOA2|ZEB2|TCF23|WT1|BMP2|MSC|ZNF69|KLF7|GATA3|NCOR2|CBX6|PEG3|IFI16|SRY|RBBP7|EDNRB|LOXL2|ZBTB45|ZFPM2|NOTCH2|SMAD7|RPS14|UXT|SOX10|ZHX2|SREBF2|VEGFA|ID3|LMCD1|SOX9|ZNF282|MEF2C|ENO1|ATF3|RPL23|HES1|TBX2|PPP…	99	0.00147125
negative regulation of RNA metabolic process (GO:0051253)	biological_process	P1	NDN|ZNF219|VGLL4|PATZ1|PKIA|H1-0|PHF6|WWTR1|ZFHX3|IRF2|TCF21|H1-10|THAP11|TFAP4|TSC22D4|CDKN1B|NIBAN2|GLI2|DPF3|TWIST1|EID1|CXXC5|TET1|NFIC|YWHAB|NONO|NKX6-3|AJUBA|TRIB3|KDM4A|SOX13|KLF3|BCL7A|GATA6|YAP1|FBP1|ZNF536|SMAD5|CC2D1A|DEAF1|DAB2|CBX4|BEND6|RELB|SMAD3|ARID5B|ELANE|RPS13|NCOA2|ZEB2|TCF23|PARP14|WT1|NKRF|BMP2|MSC|ZNF69|KLF7|LGR4|GATA3|CD38|NCOR2|CCDC85B|CBX6|PEG3|TLE2|IFI16|SRY|RBBP7|EDNR…	144	0.00204589
transport (GO:0006810)	biological_process	P1	CAPN1|ILDR2|CDH1|BMF|CCDC22|EPHB2|ATP5MC2|OSBPL7|PKIA|BLOC1S1|SIRPA|TVP23A|CCR1|LCA5|CLTB|SAMD9|SOX4|APOC1|RPS4Y1|KCNJ5|RGS4|SLC43A3|PTPN14|TBC1D9|RPS3A|ATP10D|SLC22A17|DPYSL2|MVP|MSN|GSN|RAB17|IRS1|UBQLN2|DLL1|RPL39|CKAP4|PGAM1|CD200|SCN9A|ECH1|LY75|CBLIF|ATP8A1|HSPB1|IMPDH2|IGF1R|NIBAN2|CD63|OPN3|SLC22A9|FGR|TWIST1|MAGED2|APOL2|TRPC3|RPS3|ACTB|LRRC38|SLC25A4|ATP1B1|DCLK1|TSKU|PLLP|YWHAB|COL1A1|…	465	6.32303e-05
establishment of localization (GO:0051234)	biological_process	P1	CAPN1|ILDR2|CDH1|BMF|CCDC22|EPHB2|ATP5MC2|OSBPL7|PKIA|BLOC1S1|SIRPA|TVP23A|CCR1|LCA5|CLTB|ZBED3|SAMD9|SOX4|APOC1|RPS4Y1|KCNJ5|RGS4|UBL4A|SLC43A3|PTPN14|TBC1D9|RPS3A|ATP10D|SLC22A17|DPYSL2|MVP|MSN|GSN|RAB17|IRS1|UBQLN2|DLL1|RPL39|CKAP4|PGAM1|CD200|SCN9A|ECH1|LY75|FRMPD1|CBLIF|ATP8A1|HSPB1|IMPDH2|IGF1R|NIBAN2|CD63|OPN3|SLC22A9|FGR|TWIST1|MAGED2|APOL2|TRPC3|RPS3|ACTB|LRRC38|SLC25A4|ATP1B1|DCLK1|TSKU…	471	0.000241052
regulation of catalytic activity (GO:0050790)	biological_process	P1	CAPN1|EPHB2|DDAH1|ARHGAP22|PKIA|SIRPA|WFIKKN2|KLRK1|WWTR1|APOC1|RGS4|TBC1D9|RHOC|IFI6|MVP|GSN|IRS1|TFAP4|CD200|TRIB2|INSRR|ROBO1|CDKN1B|ARHGEF3|HSPB1|IGF1R|FGR|RPS3|ACTB|BCAR3|SERPINB8|ATP1B1|YWHAB|PPP1R26|AJUBA|IL12B|TRIB3|PPIF|ADRB3|INSR|DSTYK|PFN1|ARRB2|ANXA3|PPP2R1A|CAMKK2|ARAP2|PLSCR1|SH3PXD2A|CYGB|LRP5|GNB5|RDX|SERPINH1|CSF1R|NLRC5|SMAD3|EMP2|SPOCK2|OAS1|APOA1|ELANE|PCSK6|SERINC5|NEDD9|HIP1…	248	6.97424e-05
regulation of cell projection organization (GO:0031344)	biological_process	P1	SEMA6A|EPHB2|MOV10|RAB17|PLEK2|ROBO1|BMPR2|SEMA4C|TSKU|YWHAH|LGALS1|PFN1|YAP1|NEGR1|RDX|SEMA6B|FZD1|NTNG1|TWF2|SERPINF1|CDC42EP4|LRRC4C|EPHA2|GATA3|STK24|CD38|DPYSL3|RAC2|PRNP|ARHGAP24|APOE|PIK3R1|PDPN|PPP3CA|TACSTD2|PLXNA1|OBSL1|ITGA2|FYN|CDK5|FAM110C|PLCE1|ADCY6|ITGA6|VEGFA|FSCN1|GRN|PRKD1|RHOG|NGEF|FUT9|PALM|NTNG2|ZDHHC15|SNAPIN|MAG|SYNE2|CAMK2B|PTPRD|EPHA7|NFE2L2|ITGA3|B2M|SEMA7A|TENM3|TANC2|…	82	7.53513e-05
regulation of plasma membrane bounded cell projection organization (GO:0120035)	biological_process	P1	SEMA6A|EPHB2|RAB17|PLEK2|ROBO1|BMPR2|SEMA4C|TSKU|YWHAH|LGALS1|PFN1|YAP1|NEGR1|RDX|SEMA6B|FZD1|NTNG1|TWF2|SERPINF1|CDC42EP4|LRRC4C|EPHA2|GATA3|STK24|CD38|DPYSL3|RAC2|PRNP|ARHGAP24|APOE|PIK3R1|PDPN|PPP3CA|TACSTD2|PLXNA1|OBSL1|FYN|CDK5|PLCE1|ADCY6|ITGA6|VEGFA|FSCN1|GRN|PRKD1|RHOG|NGEF|FUT9|PALM|NTNG2|ZDHHC15|SNAPIN|MAG|SYNE2|CAMK2B|PTPRD|EPHA7|NFE2L2|ITGA3|B2M|SEMA7A|TENM3|TANC2|EPHB3|CXCL12|CROCC|P…	79	0.000160735
regulation of neuron projection development (GO:0010975)	biological_process	P1	SEMA6A|EPHB2|RAB17|ROBO1|BMPR2|SEMA4C|TSKU|YWHAH|LGALS1|NEGR1|SEMA6B|FZD1|NTNG1|TWF2|SERPINF1|LRRC4C|GATA3|STK24|CD38|DPYSL3|APOE|PPP3CA|PLXNA1|OBSL1|FYN|CDK5|ADCY6|ITGA6|VEGFA|GRN|PRKD1|NGEF|FUT9|NTNG2|ZDHHC15|SNAPIN|MAG|CAMK2B|PTPRD|EPHA7|NFE2L2|ITGA3|B2M|SEMA7A|TENM3|TANC2|EPHB3|CXCL12|PTPRF|ITM2C|PREX1|SEMA4B|LRP1|IQGAP1|VIM|PLXNC1|VLDLR	57	0.00117419
positive regulation of nucleobase-containing compound metabolic process (GO:0045935)	biological_process	P1	NDN|CDH1|ZNF219|WNT6|PATZ1|ZBED3|H1-0|SOX4|WWTR1|ZFHX3|TRIM21|IRF2|TCF21|UBTF|MOV10|CREB3L4|H1-10|TFAP4|DLL1|ZC3HAV1|ZNF493|BMPR2|FZD2|NIBAN2|GLI2|DPF3|CHD6|TWIST1|RPS3|TET1|MAML3|NFIC|MAML1|NFIA|FOXJ2|HAS3|COL1A1|YWHAH|NKX6-3|INSR|TFEB|ARRB2|CD28|DTX1|NAT14|ANXA3|TRIM56|SLC38A2|USP22|CAMKK2|GATA6|RNASEL|YAP1|PLSCR1|ETS1|HNRNPA1|SMAD5|LRP5|DEAF1|NUCKS1|ZFP36L2|DAB2|STAT6|ZNF48|NLRC5|FZD1|SMAD3|AR…	190	0.000451036
positive regulation of biosynthetic process (GO:0009891)	biological_process	P1	NDN|CDH1|ZNF219|WNT6|DDAH1|PATZ1|ZBED3|H1-0|SOX4|WWTR1|ZFHX3|TRIM21|IRF2|TCF21|UBTF|CREB3L4|CCDC3|H1-10|IRS1|TFAP4|DLL1|ZNF493|ABHD6|BMPR2|FZD2|NIBAN2|OPN3|GLI2|DPF3|CHD6|TWIST1|BCAR3|TET1|MAML3|NFIC|MAML1|NFIA|FOXJ2|HAS3|COL1A1|YWHAH|NKX6-3|AJUBA|INSR|TFEB|ARRB2|CD28|DTX1|NAT14|TRIM56|USP22|CAMKK2|GATA6|RNASEL|YAP1|PLSCR1|ETS1|HNRNPA1|SMAD5|LRP5|DEAF1|NUCKS1|DAB2|STAT6|ZNF48|NLRC5|FZD1|SMAD3|ARI…	203	8.76631e-05
positive regulation of RNA metabolic process (GO:0051254)	biological_process	P1	NDN|CDH1|ZNF219|WNT6|PATZ1|ZBED3|H1-0|SOX4|WWTR1|ZFHX3|TRIM21|IRF2|TCF21|UBTF|MOV10|CREB3L4|H1-10|TFAP4|DLL1|ZC3HAV1|ZNF493|BMPR2|FZD2|NIBAN2|GLI2|DPF3|CHD6|TWIST1|TET1|MAML3|NFIC|MAML1|NFIA|FOXJ2|HAS3|COL1A1|YWHAH|NKX6-3|TFEB|CD28|DTX1|NAT14|TRIM56|SLC38A2|USP22|CAMKK2|GATA6|RNASEL|YAP1|PLSCR1|ETS1|SMAD5|LRP5|DEAF1|NUCKS1|ZFP36L2|DAB2|STAT6|ZNF48|NLRC5|FZD1|SMAD3|ARID5B|NCOA2|ZEB2|ZFP36L1|WT1|NK…	178	0.000144937
positive regulation of cellular biosynthetic process (GO:0031328)	biological_process	P1	NDN|CDH1|ZNF219|WNT6|DDAH1|PATZ1|ZBED3|H1-0|SOX4|WWTR1|ZFHX3|TRIM21|IRF2|TCF21|UBTF|CREB3L4|H1-10|IRS1|TFAP4|DLL1|ZNF493|BMPR2|FZD2|NIBAN2|OPN3|GLI2|DPF3|CHD6|TWIST1|BCAR3|TET1|MAML3|NFIC|MAML1|NFIA|FOXJ2|HAS3|COL1A1|YWHAH|NKX6-3|AJUBA|INSR|TFEB|ARRB2|CD28|DTX1|NAT14|TRIM56|USP22|CAMKK2|GATA6|RNASEL|YAP1|PLSCR1|ETS1|HNRNPA1|SMAD5|LRP5|DEAF1|NUCKS1|DAB2|STAT6|ZNF48|NLRC5|FZD1|SMAD3|ARID5B|APOA1|NC…	198	0.000171065
positive regulation of nucleic acid-templated transcription (GO:1903508)	biological_process	P1	NDN|CDH1|ZNF219|WNT6|PATZ1|ZBED3|H1-0|SOX4|WWTR1|ZFHX3|TRIM21|IRF2|TCF21|UBTF|CREB3L4|H1-10|TFAP4|DLL1|ZNF493|BMPR2|FZD2|NIBAN2|GLI2|DPF3|CHD6|TWIST1|TET1|MAML3|NFIC|MAML1|NFIA|FOXJ2|HAS3|COL1A1|YWHAH|NKX6-3|TFEB|CD28|DTX1|NAT14|TRIM56|USP22|CAMKK2|GATA6|RNASEL|YAP1|PLSCR1|ETS1|SMAD5|LRP5|DEAF1|NUCKS1|DAB2|STAT6|ZNF48|NLRC5|FZD1|SMAD3|ARID5B|NCOA2|ZEB2|WT1|NKRF|ZNF827|BMP2|PMF1|LPIN3|KLF7|CHURC1|…	169	0.000174358
positive regulation of transcription, DNA-templated (GO:0045893)	biological_process	P1	NDN|CDH1|ZNF219|WNT6|PATZ1|ZBED3|H1-0|SOX4|WWTR1|ZFHX3|TRIM21|IRF2|TCF21|UBTF|CREB3L4|H1-10|TFAP4|DLL1|ZNF493|BMPR2|FZD2|NIBAN2|GLI2|DPF3|CHD6|TWIST1|TET1|MAML3|NFIC|MAML1|NFIA|FOXJ2|HAS3|COL1A1|YWHAH|NKX6-3|TFEB|CD28|DTX1|NAT14|TRIM56|USP22|CAMKK2|GATA6|RNASEL|YAP1|PLSCR1|ETS1|SMAD5|LRP5|DEAF1|NUCKS1|DAB2|STAT6|ZNF48|NLRC5|FZD1|SMAD3|ARID5B|NCOA2|ZEB2|WT1|NKRF|ZNF827|BMP2|PMF1|LPIN3|KLF7|CHURC1|…	169	0.000174358
positive regulation of RNA biosynthetic process (GO:1902680)	biological_process	P1	NDN|CDH1|ZNF219|WNT6|PATZ1|ZBED3|H1-0|SOX4|WWTR1|ZFHX3|TRIM21|IRF2|TCF21|UBTF|CREB3L4|H1-10|TFAP4|DLL1|ZNF493|BMPR2|FZD2|NIBAN2|GLI2|DPF3|CHD6|TWIST1|TET1|MAML3|NFIC|MAML1|NFIA|FOXJ2|HAS3|COL1A1|YWHAH|NKX6-3|TFEB|CD28|DTX1|NAT14|TRIM56|USP22|CAMKK2|GATA6|RNASEL|YAP1|PLSCR1|ETS1|SMAD5|LRP5|DEAF1|NUCKS1|DAB2|STAT6|ZNF48|NLRC5|FZD1|SMAD3|ARID5B|NCOA2|ZEB2|WT1|NKRF|ZNF827|BMP2|PMF1|LPIN3|KLF7|CHURC1|…	169	0.000179151
positive regulation of macromolecule biosynthetic process (GO:0010557)	biological_process	P1	NDN|CDH1|ZNF219|WNT6|PATZ1|ZBED3|H1-0|SOX4|WWTR1|ZFHX3|TRIM21|IRF2|TCF21|UBTF|CREB3L4|H1-10|IRS1|TFAP4|DLL1|ZNF493|BMPR2|FZD2|NIBAN2|GLI2|DPF3|CHD6|TWIST1|BCAR3|TET1|MAML3|NFIC|MAML1|NFIA|FOXJ2|HAS3|COL1A1|YWHAH|NKX6-3|INSR|TFEB|ARRB2|CD28|DTX1|NAT14|TRIM56|USP22|CAMKK2|GATA6|RNASEL|YAP1|PLSCR1|ETS1|HNRNPA1|SMAD5|LRP5|DEAF1|NUCKS1|DAB2|STAT6|ZNF48|NLRC5|FZD1|SMAD3|ARID5B|NCOA2|LARP6|ZEB2|RPS4X|WT…	183	0.00129875
positive regulation of transcription by RNA polymerase II (GO:0045944)	biological_process	P1	NDN|ZNF219|ZBED3|SOX4|WWTR1|ZFHX3|IRF2|TCF21|CREB3L4|TFAP4|DLL1|ZNF493|BMPR2|GLI2|DPF3|CHD6|TWIST1|TET1|MAML3|NFIC|MAML1|NFIA|FOXJ2|NKX6-3|TFEB|CD28|GATA6|RNASEL|YAP1|PLSCR1|ETS1|SMAD5|LRP5|NUCKS1|DAB2|STAT6|ZNF48|NLRC5|SMAD3|NCOA2|ZEB2|WT1|NKRF|ZNF827|BMP2|LPIN3|KLF7|HOXD4|GATA3|BMPR1A|PLA2G1B|PEG3|IFI16|ZMIZ1|SRY|EPAS1|TOX3|ZFPM2|PIK3R1|MAML2|SMAD7|NCOA7|MED12|PPP3CA|CRTC3|CSRNP3|KLF13|CITED1|H…	121	0.0094169
cellular macromolecule biosynthetic process (GO:0034645)	biological_process	P1	NDN|EEF1A1P5|CDH1|CCDC22|ZNF219|VGLL4|WNT6|PATZ1|GGT1|ZNF347|PKIA|ST6GALNAC1|ATF7|ZNF835|ZBED3|H1-0|STOX2|SOX4|PHF6|WWTR1|RPS4Y1|ZFHX3|TRIM21|PTPN14|B4GAT1|IRF2|RPS3A|TCF21|UBTF|MOV10|CREB3L4|CHPF|EXTL2|H1-10|THAP11|IRS1|GALNT18|TFAP4|DLL1|FBXL19|RPL39|CD200|ZNF493|TSC22D4|CDKN1B|GALNT16|PPP1CA|HSPB1|BMPR2|FZD2|NIBAN2|GLI2|DPF3|CHD6|CTDSP1|POGK|TWIST1|EID1|CXXC5|RPS3|BCAR3|TET1|MAML3|NFIC|MAML1|Y…	446	8.77822e-05
macromolecule biosynthetic process (GO:0009059)	biological_process	P1	NDN|EEF1A1P5|CDH1|CCDC22|ZNF219|VGLL4|WNT6|PATZ1|GGT1|ZNF347|PKIA|ST6GALNAC1|ATF7|ZNF835|ZBED3|H1-0|STOX2|SOX4|PHF6|WWTR1|RPS4Y1|ZFHX3|TRIM21|PTPN14|B4GAT1|IRF2|RPS3A|TCF21|UBTF|MOV10|CREB3L4|CHPF|EXTL2|H1-10|THAP11|IRS1|GALNT18|TFAP4|DLL1|FBXL19|RPL39|CD200|ZNF493|TSC22D4|CDKN1B|GALNT16|PPP1CA|HSPB1|BMPR2|FZD2|NIBAN2|GLI2|DPF3|CHD6|CTDSP1|POGK|TWIST1|EID1|CXXC5|RPS3|BCAR3|TET1|MAML3|NFIC|MAML1|Y…	449	0.000144892
response to stress (GO:0006950)	biological_process	P1	EPHB2|DDAH1|GGT1|C6|SIRPA|CASP4|CCR1|GNG2|IFITM2|KLRK1|SOX4|TRIM21|MMP2|RHOC|IRF2|IFI6|MOV10|CREB3L4|GSN|EXTL2|ADAMTS5|TFAP4|UBQLN2|THEMIS2|RPL39|MR1|PLA2G7|CD200|ZC3HAV1|SCN9A|LY75|TSC22D4|IGFBP4|CDKN1B|PPP1CA|VSIG4|HSPB1|NUAK2|ANKRD6|BMPR2|IGF1R|SEMA4C|CHD6|FGR|TWIST1|GMPR|APOL2|TRPC3|RPS3|ACTB|ATP1B1|TSKU|PLLP|C1GALT1C1|COL1A1|MYL12A|NONO|AJUBA|IFI35|IL12B|TRIB3|PPIF|TLN1|LGALS1|TFEB|ARRB2|RAB…	378	0.000106222
cellular localization (GO:0051641)	biological_process	P1	CAPN1|CDH1|BMF|CCDC22|EPHB2|ATP5MC2|PKIA|BLOC1S1|SIRPA|LCA5|CLTB|CNPY4|ZBED3|WWTR1|RPS4Y1|KCNJ5|UBL4A|PTPN14|TBC1D9|RPS3A|MVP|MSN|GSN|RAB17|RPL39|CKAP4|PGAM1|ECH1|FRMPD1|ATP8A1|HSPB1|IMPDH2|PCARE|CD63|FGR|MAGED2|TRPC3|RPS3|ACTB|ATP1B1|DCLK1|YWHAB|COL1A1|YWHAH|KCNQ1|RPL29|AJUBA|TLN1|TFEB|ESYT1|RPS16|RAB20|PLEKHO2|KIF3C|ANP32A|ANXA3|MVB12A|PPP2R1A|REEP2|YAP1|ABCA1|HNRNPA1|GPR27|LRP5|RIMS3|RPL35|RDX…	330	0.000115748
establishment of localization in cell (GO:0051649)	biological_process	P1	CAPN1|CDH1|BMF|CCDC22|ATP5MC2|PKIA|BLOC1S1|SIRPA|LCA5|CLTB|ZBED3|RPS4Y1|KCNJ5|PTPN14|TBC1D9|RPS3A|MVP|MSN|GSN|RAB17|RPL39|CKAP4|PGAM1|ECH1|ATP8A1|HSPB1|IMPDH2|CD63|FGR|MAGED2|TRPC3|RPS3|ATP1B1|DCLK1|YWHAB|YWHAH|KCNQ1|RPL29|TLN1|RPS16|RAB20|PLEKHO2|KIF3C|ANP32A|ANXA3|MVB12A|REEP2|ABCA1|HNRNPA1|GPR27|LRP5|RIMS3|RPL35|RDX|DAB2|XKR8|TUBA1A|BLOC1S5|RAB6A|TOMM40|SMAD3|EMP2|APOA1|ELANE|RPS28|RPS13|GHDC|…	265	0.000464582
response to external stimulus (GO:0009605)	biological_process	P1	SEMA6A|EPHB2|GGT1|C6|SIRPA|CASP4|CCR1|IFITM2|KLRK1|TRIM21|PHF24|IRF2|IFI6|DPYSL2|MOV10|GSN|GSDME|PPIB|ADAMTS5|IFI44|RPL39|MR1|PLA2G7|CD200|ZC3HAV1|ROBO1|ZSWIM5|PPP1CA|VSIG4|HSPB1|EFNA2|NUAK2|BMPR2|NIBAN2|SEMA4C|CD63|OPN3|GLI2|FGR|TRPC3|DCLK1|COL1A1|NONO|IFI35|IL12B|TFEB|ARRB2|RAB20|CD28|SIK1|ANXA3|TRIM56|SLC38A2|ACSL4|GATA6|ZYX|RNASEL|PLSCR1|ETS1|HNRNPA1|PRKCA|COL3A1|IL10RB|SEMA6B|NRCAM|BLOC1S5|C…	277	0.000137253
small GTPase mediated signal transduction (GO:0007264)	biological_process	P1	EPHB2|ARHGAP22|RHOC|ROBO1|ARHGEF3|BCAR3|ARAP2|FBP1|ABCA1|COL3A1|RDX|RAB33B|APOA1|NUCB1|OPHN1|DOCK1|CDC42EP4|ARHGAP1|ARHGEF16|RALGDS|STMN3|RAC2|MAPRE2|ARHGAP24|MRAS|APOE|TRIO|RASAL1|PDPN|NOTCH2|F11R|PLD2|CGNL1|RIN2|CTNNAL1|RFXANK|RAPGEF3|CHML|PLCE1|VAV2|RALB|PRKD1|SIPA1|RHOG|RAB15|NGEF|CADM4|RTKN|F2R|ITGA3|PSD4|FGF10|SYDE1|TP53|ARHGAP42|HEG1|COL1A2|JUN|RASGEF1B|PREX1|RRAD|RAB35|RAB30|RHOBTB2|LPAR4…	68	0.000153663
regulation of intracellular signal transduction (GO:1902531)	biological_process	P1	SEMA6A|BMF|CCDC22|VGLL4|EPHB2|ARHGAP22|SIRPA|CCR1|RGS4|TRIM21|RHOC|GSDME|IRS1|ROBO1|IGFBP4|ARHGEF3|HSPB1|ANKRD6|IGF1R|SEMA4C|FGR|TWIST1|CXXC5|RPS3|BCAR3|NONO|AJUBA|IFI35|IL12B|TRIB3|PPIF|ADRB3|INSR|LGALS1|DSTYK|ARRB2|CD28|PPP2R1A|ARAP2|FBP1|ABCA1|CC2D1A|PRKCA|COL3A1|RDX|CSF1R|APOA1|ELANE|TICAM1|HIP1|NPR1|TDGF1|GLIPR2|NPY2R|BMP2|OPHN1|PRKAR2B|EPHA2|SH3BP4|CAMK2N1|GATA3|ERBB3|ARAF|ARHGAP1|RPL11|PYC…	184	0.000158945
positive regulation of gene expression (GO:0010628)	biological_process	P1	EPHB2|WNT6|H1-0|SOX4|CCBE1|MOV10|MSN|GSN|H1-10|CD200|ROBO1|HSPB1|FGR|TWIST1|RPS3|ACTB|IL12B|AMH|ARRB2|CD28|SLC38A2|GATA6|YAP1|PLSCR1|ETS1|RDX|STAT6|CSF1R|RELB|SMAD3|ELANE|TICAM1|LARP6|RPS4X|TCF23|WT1|BMP2|POLR3K|PRDX6|PANX1|CAMK2N1|GATA3|ERBB3|POLR1G|RPL11|PRPF19|PYCARD|NCOR2|H19|PLA2G1B|HSPD1|IFI16|POSTN|ZMIZ1|SRY|RBMS3|PIK3R1|PPP3CA|SLC26A9|ERBB2|EIF2AK2|COA3|CITED1|MYCN|CTIF|ITGA2|PDE4D|VEGFA|…	122	0.000165709
apoptotic signaling pathway (GO:0097190)	biological_process	P1	BMF|CASP4|IFI6|GSDME|PPP1CA|HSPB1|RPS3|YWHAB|NONO|YWHAH|TRIB3|PPIF|ARRB2|CD28|YAP1|PRKCA|SMAD3|TICAM1|HIP1|ITGAV|HRK|EPHA2|ERBB3|STK24|CD38|TNFRSF12A|RPL11|PYCARD|IFI16|PIK3R1|BCL2|MSH6|DAPL1|TMEM109|FYN|IFI27L2|TMEM14A|ADORA1|ITGA6|SHISA5|ENO1|PRDX2|ATF3|PPIA|IL6R|SH3RF1|NFE2L2|ANXA6|FGF10|NKX3-1|APPL1|GATA4|CASP1|ARL6IP5|BCL3|ZNF205|PHLDA3|ATP2A3|TP53|CTNNA1|NCK2|CXCL12|KRT8|GSTP1|CD14|ITM2C|JU…	75	0.000192556
central nervous system development (GO:0007417)	biological_process	P1	NDN|CDH1|EPHB2|HAPLN1|NAGLU|SOX4|RGS4|ZFHX3|DPYSL2|GSN|COL4A1|DLL1|ROBO1|EFNA2|BMPR2|SEMA4C|GLI2|PTPRZ1|ACTB|DCLK1|TSKU|FAT4|ALDH5A1|YWHAH|PYGO2|ARRB2|SOX13|ANXA3|SLC38A2|LSR|ETS1|COL3A1|NRCAM|CSF1R|FZD1|PHGDH|IL1RAPL2|MDGA1|KIRREL3|BMP2|SH3GL1|OPHN1|ZC4H2|ITGA8|CDK6|SYT1|C1QA|PRPF19|ERBB4|BMPR1A|SYNJ2|KCNK3|ZMIZ1|TRIO|ZNF430|BCL2|MED12|PPP3CA|MARCKSL1|ERBB2|CITED1|MYRF|BACE2|HNMT|NES|PBX3|PCDH18…	113	0.000229288
head development (GO:0060322)	biological_process	P1	CDH1|EPHB2|NAGLU|RGS4|ZFHX3|MMP2|DPYSL2|COL4A1|DLL1|ROBO1|EFNA2|BMPR2|SEMA4C|GLI2|ACTB|DCLK1|TSKU|COL1A1|FAT4|YWHAH|PYGO2|ARRB2|ANXA3|SLC38A2|ETS1|COL3A1|CSF1R|FZD1|ZFAND5|PHGDH|ARID5B|MDGA1|KIRREL3|BMP2|OPHN1|ITGA8|CDK6|SYT1|ERBB4|BMPR1A|SYNJ2|KCNK3|ZMIZ1|ZNF430|BCL2|PPP3CA|CITED1|HNMT|NES|PBX3|PCDH18|FYN|CDK5|SOX9|MMP14|ALDH1A3|SYPL2|HES1|AXL|SYNE2|TGFBR2|EPHA7|CXCR4|B2M|CSNK1E|FGF10|AMIGO2|SEM…	83	0.00795424
brain development (GO:0007420)	biological_process	P1	CDH1|EPHB2|NAGLU|RGS4|ZFHX3|DPYSL2|COL4A1|DLL1|ROBO1|EFNA2|BMPR2|SEMA4C|GLI2|ACTB|DCLK1|TSKU|FAT4|YWHAH|PYGO2|ARRB2|ANXA3|SLC38A2|ETS1|COL3A1|CSF1R|FZD1|PHGDH|MDGA1|KIRREL3|BMP2|OPHN1|ITGA8|CDK6|SYT1|ERBB4|BMPR1A|SYNJ2|KCNK3|ZMIZ1|ZNF430|BCL2|PPP3CA|CITED1|HNMT|NES|PBX3|PCDH18|FYN|CDK5|ALDH1A3|SYPL2|HES1|AXL|SYNE2|TGFBR2|EPHA7|CXCR4|B2M|CSNK1E|FGF10|AMIGO2|SEMA7A|OXTR|NFIB|EPHB3|TP53|CXCL12|ADGRL…	76	0.0263035
immune system process (GO:0002376)	biological_process	P1	CAPN1|PATZ1|GGT1|C6|SIRPA|CASP4|CCR1|PLCL2|IFITM2|KLRK1|SOX4|TRIM21|IRF2|IFI6|TCF21|MOV10|MVP|MSN|GSN|PPIB|RAB17|IFI44|THEMIS2|DLL1|RPL39|MR1|CKAP4|PGAM1|PLA2G7|CD200|ZC3HAV1|LY75|TMEM176B|VSIG4|ATP8A1|EFNA2|IMPDH2|IGF1R|CD63|GLI2|FGR|RPS3|ACTB|ATP1B1|COL1A1|NONO|IFI35|IL12B|LGALS1|TFEB|ARRB2|RAB20|CD28|PLEKHO2|DTX1|SOX13|KIF3C|ANXA3|TRIM56|GATA6|ZYX|RNASEL|YAP1|PLSCR1|SH3PXD2A|ETS1|SMAD5|LRP5|PR…	303	0.000256832
cellular nitrogen compound biosynthetic process (GO:0044271)	biological_process	P1	NDN|EEF1A1P5|CDH1|CCDC22|ZNF219|VGLL4|WNT6|ATP5MC2|DDAH1|PATZ1|GGT1|ZNF347|PKIA|SIRPA|ATF7|ZNF835|ZBED3|H1-0|STOX2|SOX4|PHF6|WWTR1|RPS4Y1|ZFHX3|TRIM21|PTPN14|IRF2|RPS3A|TCF21|UBTF|PAPSS1|MOV10|CREB3L4|H1-10|THAP11|TFAP4|DLL1|FBXL19|RPL39|CD200|ZNF493|TSC22D4|CDKN1B|SCD|PPP1CA|HSPB1|IMPDH2|BMPR2|FZD2|NIBAN2|GLI2|DPF3|CHD6|CTDSP1|POGK|TWIST1|UCK2|GMPR|EID1|CXXC5|RPS3|TET1|MAML3|NFIC|MAML1|YWHAB|NFI…	436	0.00038256
cell-cell signaling (GO:0007267)	biological_process	P1	ILDR2|CDH1|VGLL4|EPHB2|WNT6|CCR1|PLCL2|GNG2|ZBED3|SOX4|WWTR1|KCNJ5|RGS4|PHF24|FGFBP3|MOV10|TNN|FAT1|NPTXR|IRS1|DLL1|ZNRF3|IGFBP4|ABHD6|PPP1CA|EFNA2|ANKRD6|FZD2|NIBAN2|GLI2|SLC25A4|TSKU|COL1A1|YWHAH|KCNQ1|PYGO2|PLCB3|AMH|ACHE|PFN1|ARRB2|SOX13|ENHO|PPP2R1A|ACSL4|ZYX|YAP1|ABCA1|GPR27|LRP5|PRKCA|RIMS3|DAB2|FZD1|RNF43|SMAD3|VDAC1|AMOTL2|NTNG1|LAMA2|SH3KBP1|NPY2R|BMP2|SH3GL1|OPHN1|LRRC4C|PRKAR2B|KLF7|N…	174	0.000389648
cellular component organization (GO:0016043)	biological_process	P1	NDN|SEMA6A|CAPN1|CDH1|BMF|VGLL4|EPHB2|HAPLN1|ATP5MC2|ARHGAP22|BLOC1S1|FLNB|LCA5|CLTB|ZBED3|SAMD9|H1-0|NAGLU|WWTR1|APOC1|MMP23B|RGS4|UBL4A|MMP2|RHOC|IFI6|NAV2|ATP10D|PMEPA1|DPYSL2|UBTF|MOV10|TNN|MSN|GSN|ADAMTS5|COL5A2|H1-10|RAB17|COL4A1|FAT1|PLEK2|TFAP4|UBQLN2|DLL1|FBXL19|PLA2G7|INSRR|ECH1|ROBO1|ZSWIM5|IGFBP4|CDKN1B|PPP1CA|ATP8A1|EFNA2|NUAK2|BMPR2|FZD2|IGF1R|NIBAN2|PCARE|SEMA4C|CD63|GLI2|DPF3|CHD6…	562	0.000542847
cellular component organization or biogenesis (GO:0071840)	biological_process	P1	SURF6|NDN|SEMA6A|CAPN1|CDH1|BMF|VGLL4|EPHB2|HAPLN1|ATP5MC2|ARHGAP22|BLOC1S1|FLNB|LCA5|CLTB|ZBED3|SAMD9|H1-0|NAGLU|WWTR1|APOC1|MMP23B|RGS4|UBL4A|MMP2|RHOC|IFI6|NAV2|ATP10D|PMEPA1|DPYSL2|UBTF|MOV10|TNN|MSN|GSN|ADAMTS5|COL5A2|H1-10|RAB17|COL4A1|FAT1|PLEK2|TFAP4|UBQLN2|DLL1|FBXL19|PLA2G7|INSRR|ECH1|ROBO1|ZSWIM5|IGFBP4|CDKN1B|PPP1CA|ATP8A1|EFNA2|NUAK2|BMPR2|FZD2|IGF1R|NIBAN2|PCARE|SEMA4C|CD63|GLI2|DPF…	577	0.000554181
multicellular organismal homeostasis (GO:0048871)	biological_process	P1	NDN|ILDR2|LCA5|PLCL2|WWTR1|ADAMTS5|DLL1|ABHD6|SCD|HSPB1|IGF1R|ACTB|TSKU|ADRB3|ACHE|LSR|YAP1|PRKCA|STAT6|CSF1R|LAMA2|AQP3|PRKAR2B|LGR4|CD38|RAC2|EPAS1|EDNRB|F11R|BCL2|CRTC3|ADORA1|ADCY6|VEGFA|VCL|SOX9|PPP1R13L|F2R|AQP4|CXCR4|TFF3|ALDH1A1|B2M|GADD45G|JAM2|OXTR|LTBP3|SYK|DMD|CROCC|P2RX7|CHMP4B|GATM|CDH3|BAX|TLR4|LPCAT1|CLDN1|PRKAR1B|RAC1|EXT1	61	0.0110392
macromolecule localization (GO:0033036)	biological_process	P1	ILDR2|CDH1|BMF|CCDC22|EPHB2|OSBPL7|PKIA|TVP23A|LCA5|CLTB|CNPY4|SOX4|WWTR1|APOC1|RPS4Y1|UBL4A|TRIM21|PTPN14|TBC1D9|RPS3A|ATP10D|MVP|MSN|GSN|RAB17|IRS1|RPL39|CD200|ECH1|FRMPD1|ATP8A1|HSPB1|PCARE|CD63|SLC22A9|APOL2|RPS3|ACTB|SLC25A4|ATP1B1|DCLK1|TSKU|YWHAB|COL1A1|YWHAH|SNX21|RPL29|LRP10|AJUBA|IL12B|ESYT1|ACHE|RPS16|ARRB2|RAB20|ENHO|KIF3C|MVB12A|SLC38A2|LSR|REEP2|ACSL4|YAP1|PLSCR1|ABCA1|HNRNPA1|GPR27…	296	0.000685266
protein localization (GO:0008104)	biological_process	P1	ILDR2|CDH1|BMF|CCDC22|EPHB2|PKIA|TVP23A|LCA5|CLTB|CNPY4|SOX4|WWTR1|RPS4Y1|UBL4A|TRIM21|PTPN14|TBC1D9|RPS3A|MVP|MSN|GSN|RAB17|IRS1|RPL39|CD200|ECH1|FRMPD1|HSPB1|PCARE|CD63|RPS3|ACTB|SLC25A4|ATP1B1|DCLK1|YWHAB|COL1A1|YWHAH|SNX21|RPL29|AJUBA|IL12B|ACHE|RPS16|ARRB2|RAB20|ENHO|KIF3C|MVB12A|LSR|REEP2|ACSL4|YAP1|ABCA1|GPR27|LRP5|PRKCA|RPL35|RDX|DAB2|RAB6A|RAB33B|TOMM40|SMAD3|EMP2|PLOD3|RPS28|RPS13|RHBDF…	254	0.00296033
primary metabolic process (GO:0044238)	biological_process	P1	NDN|EEF1A1P5|LSM7|FAM20C|CAPN1|CDH1|CCDC22|ZNF219|VGLL4|EPHB2|WNT6|ATP5MC2|DDAH1|PATZ1|MARCHF9|GGT1|OSBPL7|ZNF347|PKIA|BLOC1S1|SIRPA|HTRA3|CASP4|ST6GALNAC1|ATF7|WFIKKN2|PLCL2|ZNF835|MTMR8|ZBED3|H1-0|STOX2|SOX4|PHF6|WWTR1|APOC1|MMP23B|KDSR|RPS4Y1|RGS4|UBL4A|ZFHX3|TRIM21|PTPN14|COLGALT2|AMHR2|B4GAT1|MMP2|SNORD114-1|IRF2|RPS3A|IFI6|SULT1C4|TCF21|CCBE1|QTRT1|PMEPA1|DPYSL2|UBTF|PAPSS1|MOV10|MVP|CREB3L…	887	0.000701466
nitrogen compound metabolic process (GO:0006807)	biological_process	P1	NDN|EEF1A1P5|LSM7|FAM20C|CAPN1|CDH1|CCDC22|ZNF219|VGLL4|EPHB2|WNT6|ATP5MC2|DDAH1|PATZ1|MARCHF9|GGT1|OSBPL7|ZNF347|PKIA|BLOC1S1|SIRPA|HTRA3|CASP4|ST6GALNAC1|ATF7|WFIKKN2|PLCL2|ZNF835|MTMR8|ZBED3|H1-0|STOX2|NAGLU|SOX4|PHF6|WWTR1|APOC1|MMP23B|KDSR|RPS4Y1|RGS4|UBL4A|ZFHX3|TRIM21|PTPN14|COLGALT2|AMHR2|B4GAT1|MMP2|SNORD114-1|IRF2|RPS3A|IFI6|SULT1C4|TCF21|CCBE1|QTRT1|PMEPA1|DPYSL2|UBTF|PAPSS1|MOV10|MVP|…	846	0.00154856
organic substance metabolic process (GO:0071704)	biological_process	P1	NDN|EEF1A1P5|LSM7|FAM20C|CAPN1|CDH1|CCDC22|ZNF219|VGLL4|EPHB2|WNT6|ATP5MC2|DDAH1|PATZ1|MARCHF9|GGT1|OSBPL7|ZNF347|PKIA|BLOC1S1|SIRPA|HTRA3|CASP4|CCR1|ST6GALNAC1|ATF7|WFIKKN2|PLCL2|ZNF835|MTMR8|ZBED3|H1-0|STOX2|NAGLU|SOX4|PHF6|WWTR1|APOC1|MMP23B|KDSR|RPS4Y1|RGS4|UBL4A|ZFHX3|TRIM21|PTPN14|COLGALT2|AMHR2|B4GAT1|MMP2|SNORD114-1|IRF2|RPS3A|IFI6|SULT1C4|TCF21|CCBE1|QTRT1|PMEPA1|DPYSL2|UBTF|PAPSS1|MOV10…	947	0.0210828
regulation of protein metabolic process (GO:0051246)	biological_process	P1	NDN|CDH1|CCDC22|VGLL4|EPHB2|OSBPL7|PKIA|SIRPA|WFIKKN2|PLCL2|ZBED3|SOX4|WWTR1|RGS4|TRIM21|IFI6|CCBE1|PMEPA1|MOV10|MVP|MSN|GSN|TFAP4|UBQLN2|TRIB2|ROBO1|CDKN1B|PPP1CA|HSPB1|BMPR2|IGF1R|FGR|TWIST1|EID1|RPS3|ACTB|BCAR3|SERPINB8|TET1|YWHAB|PPP1R26|AJUBA|PYGO2|IL12B|TRIB3|INSR|ARRB2|CD28|PPP2R1A|NAP1L2|CAMKK2|LRP5|ZFP36L2|RDX|DAB2|SERPINH1|MAGEF1|CSF1R|USP13|SMAD3|EMP2|SPOCK2|APOA1|ELANE|LIMCH1|TICAM1|I…	251	0.00101797
regulation of cellular protein metabolic process (GO:0032268)	biological_process	P1	NDN|CCDC22|VGLL4|EPHB2|OSBPL7|PKIA|SIRPA|WFIKKN2|PLCL2|ZBED3|SOX4|WWTR1|RGS4|TRIM21|IFI6|CCBE1|PMEPA1|MOV10|MVP|MSN|GSN|TFAP4|UBQLN2|TRIB2|ROBO1|CDKN1B|PPP1CA|HSPB1|BMPR2|IGF1R|FGR|TWIST1|EID1|RPS3|ACTB|BCAR3|SERPINB8|TET1|YWHAB|PPP1R26|AJUBA|PYGO2|IL12B|TRIB3|INSR|ARRB2|CD28|PPP2R1A|NAP1L2|CAMKK2|LRP5|ZFP36L2|RDX|DAB2|SERPINH1|MAGEF1|CSF1R|USP13|SMAD3|EMP2|SPOCK2|APOA1|ELANE|LIMCH1|TICAM1|IFNE|N…	237	0.00125045
response to organic cyclic compound (GO:0014070)	biological_process	P1	CDH1|GGT1|OSBPL7|GNG2|RGS4|TCF21|PMEPA1|MSN|GSN|TFAP4|GLI2|TRPC3|ACTB|COL1A1|YWHAH|KCNQ1|LGALS1|AMH|ARRB2|ANXA3|YAP1|ETS1|SMAD5|GNB5|ZFP36L2|DAB2|NCOA2|TICAM1|IFNE|COLEC12|ZFP36L1|SERPINF1|WT1|BMP2|MMP15|AQP3|PRKAR2B|MGARP|PANX1|CD38|NCOR2|POSTN|ZMIZ1|RBBP7|EDNRB|GNA14|BCL2|TMEM38A|FAM107A|CITED1|HNMT|RAPGEF3|ITGA2|CDK5|SOX10|FLT3|ADCY6|HSD11B2|ITGA6|RALB|ID3|MEF2C|APEX1|MMP14|PDXP|CDK4|GGT7|PALM…	102	0.00125045
response to lipid (GO:0033993)	biological_process	P1	WNT6|GGT1|OSBPL7|SIRPA|TCF21|PMEPA1|MSN|IRS1|TFAP4|SCD|COL1A1|YWHAH|IL12B|ANXA3|GATA6|YAP1|ETS1|PRKCA|ZFP36L2|DAB2|ELANE|NCOA2|TICAM1|ZFP36L1|TWF2|SERPINF1|MMP15|AQP3|MGARP|CD38|PYCARD|NCOR2|POSTN|ZMIZ1|RBBP7|EDNRB|SHPK|NOS2|BCL2|ABCG1|FAM107A|CITED1|IFNAR1|HNMT|ITGA2|SOX10|FLT3|ADCY6|HSD11B2|ID3|SOX9|MEF2C|CDK4|GGT7|PRDX2|RGS9|AXL|TGFBR2|ESR2|F2R|SNCA|MAPKAPK3|PRMT2|IRAK2|APOB|FGF10|NKX3-1|SPARC…	96	0.00247285
cellular response to organic cyclic compound (GO:0071407)	biological_process	P1	CDH1|OSBPL7|GNG2|RGS4|TCF21|PMEPA1|MSN|TFAP4|GLI2|ACTB|COL1A1|YWHAH|KCNQ1|LGALS1|ARRB2|YAP1|SMAD5|GNB5|ZFP36L2|DAB2|COLEC12|ZFP36L1|SERPINF1|WT1|BMP2|MGARP|NCOR2|ZMIZ1|GNA14|TMEM38A|FAM107A|RAPGEF3|ITGA2|SOX10|FLT3|ADCY6|ITGA6|RALB|ID3|MEF2C|APEX1|PDXP|CDK4|PALM|RGS9|ESR2|SNCA|PRMT2|NKX3-1|ASS1|CRHBP|CTNNA1|DAG1|STC1|GSTP1|NRIP1|P2RX7|NSG1|CASP6|ELK1|CTNNB1|ATP2B4	62	0.0286683
cellular metabolic process (GO:0044237)	biological_process	P1	NDN|EEF1A1P5|LSM7|FAM20C|CAPN1|CDH1|BMF|CCDC22|ZNF219|VGLL4|EPHB2|WNT6|ATP5MC2|DDAH1|PATZ1|MARCHF9|GGT1|OSBPL7|ZNF347|PKIA|BLOC1S1|SIRPA|ST6GALNAC1|ATF7|WFIKKN2|PLCL2|ZNF835|MTMR8|ZBED3|H1-0|STOX2|SOX4|PHF6|WWTR1|APOC1|KDSR|RPS4Y1|RGS4|UBL4A|ZFHX3|TRIM21|PTPN14|COLGALT2|AMHR2|B4GAT1|MMP2|SNORD114-1|IRF2|RPS3A|IFI6|SULT1C4|TCF21|CCBE1|QTRT1|PMEPA1|DPYSL2|UBTF|PAPSS1|MOV10|MVP|CREB3L4|MSN|SNORD114-…	905	0.00126951
regulation of macromolecule biosynthetic process (GO:0010556)	biological_process	P1	NDN|CDH1|CCDC22|ZNF219|VGLL4|WNT6|PATZ1|ZNF347|PKIA|ATF7|ZNF835|ZBED3|H1-0|STOX2|SOX4|PHF6|WWTR1|ZFHX3|TRIM21|PTPN14|IRF2|TCF21|UBTF|MOV10|CREB3L4|H1-10|THAP11|IRS1|TFAP4|DLL1|FBXL19|CD200|ZNF493|TSC22D4|CDKN1B|PPP1CA|HSPB1|BMPR2|FZD2|NIBAN2|GLI2|DPF3|CHD6|CTDSP1|POGK|TWIST1|EID1|CXXC5|RPS3|BCAR3|TET1|MAML3|NFIC|MAML1|YWHAB|NFIA|FOXJ2|HAS3|COL1A1|NONO|YWHAH|NKX6-3|AJUBA|TRIB3|INSR|AMH|TFEB|KDM4A|…	346	0.0198159
regulation of transcription, DNA-templated (GO:0006355)	biological_process	P1	NDN|CDH1|CCDC22|ZNF219|VGLL4|WNT6|PATZ1|ZNF347|PKIA|ATF7|ZNF835|ZBED3|H1-0|STOX2|SOX4|PHF6|WWTR1|ZFHX3|TRIM21|PTPN14|IRF2|TCF21|UBTF|CREB3L4|H1-10|THAP11|TFAP4|DLL1|FBXL19|CD200|ZNF493|TSC22D4|CDKN1B|BMPR2|FZD2|NIBAN2|GLI2|DPF3|CHD6|CTDSP1|POGK|TWIST1|EID1|CXXC5|RPS3|TET1|MAML3|NFIC|MAML1|YWHAB|NFIA|FOXJ2|HAS3|COL1A1|NONO|YWHAH|NKX6-3|AJUBA|TRIB3|INSR|AMH|TFEB|KDM4A|ARRB2|CD28|DTX1|SOX13|SIK1|NAT…	316	0.00142
regulation of nucleic acid-templated transcription (GO:1903506)	biological_process	P1	NDN|CDH1|CCDC22|ZNF219|VGLL4|WNT6|PATZ1|ZNF347|PKIA|ATF7|ZNF835|ZBED3|H1-0|STOX2|SOX4|PHF6|WWTR1|ZFHX3|TRIM21|PTPN14|IRF2|TCF21|UBTF|CREB3L4|H1-10|THAP11|TFAP4|DLL1|FBXL19|CD200|ZNF493|TSC22D4|CDKN1B|BMPR2|FZD2|NIBAN2|GLI2|DPF3|CHD6|CTDSP1|POGK|TWIST1|EID1|CXXC5|RPS3|TET1|MAML3|NFIC|MAML1|YWHAB|NFIA|FOXJ2|HAS3|COL1A1|NONO|YWHAH|NKX6-3|AJUBA|TRIB3|INSR|AMH|TFEB|KDM4A|ARRB2|CD28|DTX1|SOX13|SIK1|NAT…	316	0.00144818
regulation of RNA biosynthetic process (GO:2001141)	biological_process	P1	NDN|CDH1|CCDC22|ZNF219|VGLL4|WNT6|PATZ1|ZNF347|PKIA|ATF7|ZNF835|ZBED3|H1-0|STOX2|SOX4|PHF6|WWTR1|ZFHX3|TRIM21|PTPN14|IRF2|TCF21|UBTF|CREB3L4|H1-10|THAP11|TFAP4|DLL1|FBXL19|CD200|ZNF493|TSC22D4|CDKN1B|BMPR2|FZD2|NIBAN2|GLI2|DPF3|CHD6|CTDSP1|POGK|TWIST1|EID1|CXXC5|RPS3|TET1|MAML3|NFIC|MAML1|YWHAB|NFIA|FOXJ2|HAS3|COL1A1|NONO|YWHAH|NKX6-3|AJUBA|TRIB3|INSR|AMH|TFEB|KDM4A|ARRB2|CD28|DTX1|SOX13|SIK1|NAT…	316	0.00155633
regulation of RNA metabolic process (GO:0051252)	biological_process	P1	NDN|CDH1|CCDC22|ZNF219|VGLL4|WNT6|PATZ1|ZNF347|PKIA|ATF7|ZNF835|ZBED3|H1-0|STOX2|SOX4|PHF6|WWTR1|ZFHX3|TRIM21|PTPN14|IRF2|TCF21|UBTF|MOV10|CREB3L4|H1-10|THAP11|TFAP4|DLL1|FBXL19|CD200|ZC3HAV1|ZNF493|TSC22D4|CDKN1B|HSPB1|BMPR2|FZD2|NIBAN2|GLI2|DPF3|CHD6|CTDSP1|POGK|TWIST1|EID1|CXXC5|RPS3|TET1|MAML3|NFIC|MAML1|YWHAB|NFIA|FOXJ2|HAS3|COL1A1|NONO|YWHAH|NKX6-3|AJUBA|TRIB3|INSR|CSDC2|AMH|TFEB|KDM4A|ARRB…	338	0.00153569
transcription, DNA-templated (GO:0006351)	biological_process	P1	NDN|CDH1|CCDC22|ZNF219|VGLL4|WNT6|PATZ1|ZNF347|PKIA|ATF7|ZNF835|ZBED3|H1-0|STOX2|SOX4|PHF6|WWTR1|ZFHX3|TRIM21|PTPN14|IRF2|TCF21|UBTF|CREB3L4|H1-10|THAP11|TFAP4|DLL1|FBXL19|CD200|ZNF493|TSC22D4|CDKN1B|BMPR2|FZD2|NIBAN2|GLI2|DPF3|CHD6|CTDSP1|POGK|TWIST1|EID1|CXXC5|RPS3|TET1|MAML3|NFIC|MAML1|YWHAB|NFIA|FOXJ2|HAS3|COL1A1|NONO|YWHAH|NKX6-3|AJUBA|TRIB3|INSR|AMH|TFEB|KDM4A|ARRB2|CD28|DTX1|SOX13|SIK1|NAT…	326	0.00357054
nucleic acid-templated transcription (GO:0097659)	biological_process	P1	NDN|CDH1|CCDC22|ZNF219|VGLL4|WNT6|PATZ1|ZNF347|PKIA|ATF7|ZNF835|ZBED3|H1-0|STOX2|SOX4|PHF6|WWTR1|ZFHX3|TRIM21|PTPN14|IRF2|TCF21|UBTF|CREB3L4|H1-10|THAP11|TFAP4|DLL1|FBXL19|CD200|ZNF493|TSC22D4|CDKN1B|BMPR2|FZD2|NIBAN2|GLI2|DPF3|CHD6|CTDSP1|POGK|TWIST1|EID1|CXXC5|RPS3|TET1|MAML3|NFIC|MAML1|YWHAB|NFIA|FOXJ2|HAS3|COL1A1|NONO|YWHAH|NKX6-3|AJUBA|TRIB3|INSR|AMH|TFEB|KDM4A|ARRB2|CD28|DTX1|SOX13|SIK1|NAT…	326	0.00363415
RNA biosynthetic process (GO:0032774)	biological_process	P1	NDN|CDH1|CCDC22|ZNF219|VGLL4|WNT6|PATZ1|ZNF347|PKIA|ATF7|ZNF835|ZBED3|H1-0|STOX2|SOX4|PHF6|WWTR1|ZFHX3|TRIM21|PTPN14|IRF2|TCF21|UBTF|CREB3L4|H1-10|THAP11|TFAP4|DLL1|FBXL19|CD200|ZNF493|TSC22D4|CDKN1B|BMPR2|FZD2|NIBAN2|GLI2|DPF3|CHD6|CTDSP1|POGK|TWIST1|EID1|CXXC5|RPS3|TET1|MAML3|NFIC|MAML1|YWHAB|NFIA|FOXJ2|HAS3|COL1A1|NONO|YWHAH|NKX6-3|AJUBA|TRIB3|INSR|AMH|TFEB|KDM4A|ARRB2|CD28|DTX1|SOX13|SIK1|NAT…	326	0.00453759
heterocycle biosynthetic process (GO:0018130)	biological_process	P1	NDN|CDH1|CCDC22|ZNF219|VGLL4|WNT6|ATP5MC2|PATZ1|ZNF347|PKIA|ATF7|ZNF835|ZBED3|H1-0|STOX2|SOX4|PHF6|WWTR1|ZFHX3|TRIM21|PTPN14|IRF2|TCF21|UBTF|PAPSS1|CREB3L4|H1-10|THAP11|TFAP4|DLL1|FBXL19|CD200|ZNF493|TSC22D4|CDKN1B|SCD|IMPDH2|BMPR2|FZD2|NIBAN2|GLI2|DPF3|CHD6|CTDSP1|POGK|TWIST1|UCK2|GMPR|EID1|CXXC5|RPS3|TET1|MAML3|NFIC|MAML1|YWHAB|NFIA|FOXJ2|HAS3|COL1A1|NONO|YWHAH|NKX6-3|AJUBA|TRIB3|INSR|AMH|TFEB|…	359	0.0261465
regulation of biosynthetic process (GO:0009889)	biological_process	P1	NDN|CDH1|CCDC22|ZNF219|VGLL4|WNT6|DDAH1|PATZ1|ZNF347|PKIA|SIRPA|ATF7|ZNF835|ZBED3|H1-0|STOX2|SOX4|PHF6|WWTR1|APOC1|ZFHX3|TRIM21|PTPN14|IRF2|TCF21|UBTF|MOV10|CREB3L4|CCDC3|H1-10|THAP11|IRS1|TFAP4|DLL1|FBXL19|CD200|ZNF493|TSC22D4|ABHD6|CDKN1B|SCD|PPP1CA|HSPB1|BMPR2|FZD2|NIBAN2|OPN3|GLI2|DPF3|CHD6|CTDSP1|POGK|TWIST1|EID1|CXXC5|RPS3|BCAR3|TET1|MAML3|NFIC|MAML1|YWHAB|NFIA|FOXJ2|HAS3|COL1A1|NONO|YWHAH|…	378	0.00179826
regulation of cellular biosynthetic process (GO:0031326)	biological_process	P1	NDN|CDH1|CCDC22|ZNF219|VGLL4|WNT6|DDAH1|PATZ1|ZNF347|PKIA|SIRPA|ATF7|ZNF835|ZBED3|H1-0|STOX2|SOX4|PHF6|WWTR1|APOC1|ZFHX3|TRIM21|PTPN14|IRF2|TCF21|UBTF|MOV10|CREB3L4|H1-10|THAP11|IRS1|TFAP4|DLL1|FBXL19|CD200|ZNF493|TSC22D4|CDKN1B|PPP1CA|HSPB1|BMPR2|FZD2|NIBAN2|OPN3|GLI2|DPF3|CHD6|CTDSP1|POGK|TWIST1|EID1|CXXC5|RPS3|BCAR3|TET1|MAML3|NFIC|MAML1|YWHAB|NFIA|FOXJ2|HAS3|COL1A1|NONO|YWHAH|NKX6-3|AJUBA|TRI…	367	0.00444311
organic cyclic compound biosynthetic process (GO:1901362)	biological_process	P1	NDN|CDH1|CCDC22|ZNF219|VGLL4|WNT6|ATP5MC2|PATZ1|OSBPL7|ZNF347|PKIA|ATF7|ZNF835|ZBED3|H1-0|STOX2|SOX4|PHF6|WWTR1|ZFHX3|TRIM21|PTPN14|IRF2|TCF21|UBTF|PAPSS1|CREB3L4|H1-10|THAP11|TFAP4|DLL1|FBXL19|CD200|ZNF493|TSC22D4|CDKN1B|SCD|IMPDH2|BMPR2|FZD2|NIBAN2|OPN3|GLI2|DPF3|CHD6|CTDSP1|POGK|TWIST1|UCK2|GMPR|EID1|CXXC5|RPS3|TET1|MAML3|NFIC|MAML1|YWHAB|NFIA|FOXJ2|HAS3|COL1A1|NONO|YWHAH|NKX6-3|AJUBA|TRIB3|IN…	380	0.00683427
regulation of nucleobase-containing compound metabolic process (GO:0019219)	biological_process	P1	NDN|CDH1|CCDC22|ZNF219|VGLL4|WNT6|PATZ1|ZNF347|PKIA|ATF7|ZNF835|ZBED3|H1-0|STOX2|SOX4|PHF6|WWTR1|ZFHX3|TRIM21|PTPN14|IRF2|TCF21|UBTF|MOV10|CREB3L4|H1-10|THAP11|TFAP4|DLL1|FBXL19|PGAM1|CD200|ZC3HAV1|ZNF493|TSC22D4|CDKN1B|HSPB1|BMPR2|FZD2|NIBAN2|GLI2|DPF3|CHD6|CTDSP1|POGK|TWIST1|EID1|CXXC5|RPS3|TET1|MAML3|NFIC|MAML1|YWHAB|NFIA|FOXJ2|HAS3|COL1A1|NONO|YWHAH|NKX6-3|AJUBA|TRIB3|INSR|CSDC2|AMH|TFEB|KDM4…	351	0.00884841
aromatic compound biosynthetic process (GO:0019438)	biological_process	P1	NDN|CDH1|CCDC22|ZNF219|VGLL4|WNT6|ATP5MC2|PATZ1|ZNF347|PKIA|ATF7|ZNF835|ZBED3|H1-0|STOX2|SOX4|PHF6|WWTR1|ZFHX3|TRIM21|PTPN14|IRF2|TCF21|UBTF|PAPSS1|CREB3L4|H1-10|THAP11|TFAP4|DLL1|FBXL19|CD200|ZNF493|TSC22D4|CDKN1B|SCD|IMPDH2|BMPR2|FZD2|NIBAN2|OPN3|GLI2|DPF3|CHD6|CTDSP1|POGK|TWIST1|UCK2|GMPR|EID1|CXXC5|RPS3|TET1|MAML3|NFIC|MAML1|YWHAB|NFIA|FOXJ2|HAS3|COL1A1|NONO|YWHAH|NKX6-3|AJUBA|TRIB3|INSR|AMH|…	363	0.01487
regulation of cellular macromolecule biosynthetic process (GO:2000112)	biological_process	P1	NDN|CDH1|CCDC22|ZNF219|VGLL4|WNT6|PATZ1|ZNF347|PKIA|ATF7|ZNF835|ZBED3|H1-0|STOX2|SOX4|PHF6|WWTR1|ZFHX3|TRIM21|PTPN14|IRF2|TCF21|UBTF|MOV10|CREB3L4|H1-10|THAP11|IRS1|TFAP4|DLL1|FBXL19|CD200|ZNF493|TSC22D4|CDKN1B|PPP1CA|HSPB1|BMPR2|FZD2|NIBAN2|GLI2|DPF3|CHD6|CTDSP1|POGK|TWIST1|EID1|CXXC5|RPS3|BCAR3|TET1|MAML3|NFIC|MAML1|YWHAB|NFIA|FOXJ2|HAS3|COL1A1|NONO|YWHAH|NKX6-3|AJUBA|TRIB3|INSR|AMH|TFEB|KDM4A|…	345	0.0154727
nucleobase-containing compound biosynthetic process (GO:0034654)	biological_process	P1	NDN|CDH1|CCDC22|ZNF219|VGLL4|WNT6|ATP5MC2|PATZ1|ZNF347|PKIA|ATF7|ZNF835|ZBED3|H1-0|STOX2|SOX4|PHF6|WWTR1|ZFHX3|TRIM21|PTPN14|IRF2|TCF21|UBTF|PAPSS1|CREB3L4|H1-10|THAP11|TFAP4|DLL1|FBXL19|CD200|ZNF493|TSC22D4|CDKN1B|SCD|IMPDH2|BMPR2|FZD2|NIBAN2|GLI2|DPF3|CHD6|CTDSP1|POGK|TWIST1|UCK2|GMPR|EID1|CXXC5|RPS3|TET1|MAML3|NFIC|MAML1|YWHAB|NFIA|FOXJ2|HAS3|COL1A1|NONO|YWHAH|NKX6-3|AJUBA|TRIB3|INSR|AMH|TFEB|…	356	0.0176574
regulation of protein localization (GO:0032880)	biological_process	P1	CDH1|EPHB2|PKIA|CNPY4|SOX4|WWTR1|TRIM21|PTPN14|MSN|GSN|IRS1|CD200|ACTB|SLC25A4|DCLK1|YWHAB|YWHAH|IL12B|ACHE|ENHO|ACSL4|YAP1|GPR27|LRP5|PRKCA|RDX|DAB2|SMAD3|RHBDF1|NUCB1|OPHN1|KLF7|NLGN2|EPHA2|CAMK2N1|CD38|SLC8B1|ERBB4|ARHGEF16|RAC2|PRNP|PLA2G1B|APOE|FRMD4A|NHLRC1|PIK3R1|NOS2|BCL2|PPP3CA|ABCG1|ANG|ERBB2|EDEM2|GPC1|NDFIP1|RAPGEF3|FYN|CDK5|SREBF2|CORO2B|FERMT1|RALB|VCL|RHOG|MMP14|GAS6|PPIA|F2R|HUWE1…	99	0.0016402
regulation of cellular localization (GO:0060341)	biological_process	P1	CDH1|EPHB2|PKIA|CNPY4|WWTR1|PTPN14|MSN|GSN|FGR|TRPC3|ACTB|DCLK1|YWHAB|YWHAH|REEP2|YAP1|GPR27|LRP5|RDX|DAB2|SMAD3|NUCB1|ZFP36L1|OPHN1|KLF7|NLGN2|EPHA2|CAMK2N1|ARHGAP1|ERBB4|ARHGEF16|RAC2|PRNP|PLA2G1B|JPH4|NHLRC1|PIK3R1|BCL2|TMEM38A|ERBB2|EDEM2|NEFH|KIAA1614|GPC1|RAPGEF3|FYN|CDK5|PDE4D|SREBF2|FERMT1|RALB|RHOG|MMP14|GSTO1|GAS6|F2R|SNCA|HUWE1|ITGA3|MDFIC|CSNK1E|DTX3L|MIEF2|APPL1|GAB2|CLIP3|SYK|TP53|D…	92	0.00321724
regulation of cellular protein localization (GO:1903827)	biological_process	P1	CDH1|EPHB2|PKIA|CNPY4|WWTR1|PTPN14|MSN|GSN|ACTB|DCLK1|YWHAB|YWHAH|YAP1|RDX|DAB2|SMAD3|NUCB1|OPHN1|EPHA2|ERBB4|ARHGEF16|RAC2|PRNP|NHLRC1|PIK3R1|BCL2|ERBB2|EDEM2|GPC1|RAPGEF3|FYN|CDK5|SREBF2|FERMT1|RALB|RHOG|MMP14|GAS6|HUWE1|ITGA3|MDFIC|CSNK1E|DTX3L|MIEF2|APPL1|CLIP3|TP53|CTNNA1|DAG1|TCAF1|CROCC|BICD1|TRIM8|ASTN2|LRP1|GNL3L|SYT11|IQGAP1|CTNNB1|TMBIM1|ATP2B4|ZMYND8	62	0.0258818
positive regulation of cell population proliferation (GO:0008284)	biological_process	P1	CAPN1|SOX4|WWTR1|MMP2|IRS1|DLL1|BMPR2|IGF1R|GLI2|TWIST1|RPS3|TET1|FOXJ2|IL12B|INSR|CD28|PDF|GATA6|YAP1|ETS1|LRP5|PRKCA|CSF1R|EMP2|ELANE|TICAM1|RPS4X|TDGF1|ITGAV|BMP2|CNTFR|CDK6|ERBB3|CD38|TNFSF13B|PYCARD|ERBB4|BMPR1A|RAC2|PLA2G1B|S1PR3|ZMIZ1|EDNRB|ZFPM2|NOTCH2|BCL2|ANG|GRK5|MARCKSL1|ERBB2|CITED1|SMARCD3|SHMT2|NES|ITGA2|SOX10|FLT3|VEGFA|GRN|PRKD1|SOX9|MEF2C|RHOG|CDK4|ATF3|RPL23|GAS6|HES1|TBX2|IL6R…	104	0.00187628
catabolic process (GO:0009056)	biological_process	P1	LSM7|CAPN1|CDH1|BMF|CCDC22|VGLL4|DDAH1|GGT1|OSBPL7|MTMR8|H1-0|NAGLU|WWTR1|APOC1|MMP23B|RPS4Y1|TRIM21|MMP2|RPS3A|SULT1C4|MOV10|MSN|RNF150|IRS1|UBQLN2|CYP2A6|FBXL19|RPL39|PGAM1|PLA2G7|ZC3HAV1|TRIB2|ECH1|ZNRF3|ABHD6|CDKN1B|PPP1CA|HSPB1|TWIST1|RPS3|TET1|YWHAB|ALDH5A1|YWHAH|RPL29|TRIB3|PLCB3|INSR|CSDC2|TFEB|KDM4A|ACHE|PJA1|SGSH|RPS16|ARRB2|ANP32A|MVB12A|PPP2R1A|USP22|CAMKK2|RNASEL|FBP1|LRP5|PRKCA|ZFP3…	254	0.00274981
organic substance catabolic process (GO:1901575)	biological_process	P1	LSM7|CAPN1|CDH1|CCDC22|VGLL4|DDAH1|GGT1|OSBPL7|H1-0|NAGLU|WWTR1|APOC1|RPS4Y1|RPS3A|SULT1C4|MOV10|MSN|RNF150|IRS1|UBQLN2|CYP2A6|FBXL19|RPL39|PGAM1|PLA2G7|ZC3HAV1|TRIB2|ECH1|ZNRF3|ABHD6|CDKN1B|PPP1CA|HSPB1|TWIST1|RPS3|TET1|YWHAB|ALDH5A1|YWHAH|RPL29|TRIB3|PLCB3|INSR|CSDC2|ACHE|PJA1|SGSH|RPS16|ARRB2|ANP32A|MVB12A|PPP2R1A|USP22|RNASEL|FBP1|LRP5|PRKCA|ZFP36L2|RPL35|RDX|DAB2|MAGEF1|USP13|RNF43|SMAD3|APO…	210	0.008251
cellular catabolic process (GO:0044248)	biological_process	P1	LSM7|CAPN1|BMF|CCDC22|VGLL4|DDAH1|GGT1|OSBPL7|MTMR8|H1-0|WWTR1|APOC1|RPS4Y1|TRIM21|RPS3A|MOV10|MSN|RNF150|IRS1|UBQLN2|CYP2A6|FBXL19|RPL39|PGAM1|PLA2G7|ZC3HAV1|TRIB2|ECH1|ZNRF3|ABHD6|PPP1CA|HSPB1|TWIST1|RPS3|TET1|YWHAB|ALDH5A1|RPL29|TRIB3|INSR|CSDC2|TFEB|KDM4A|ACHE|SGSH|RPS16|ARRB2|ANP32A|MVB12A|PPP2R1A|USP22|CAMKK2|RNASEL|PRKCA|ZFP36L2|RPL35|RDX|DAB2|MAGEF1|RAB33B|HSPB8|TOMM40|USP13|RNF43|APOA1|R…	211	0.0364001
negative regulation of cell population proliferation (GO:0008285)	biological_process	P1	NDN|VGLL4|DDAH1|SOX4|PTPN14|TNN|GSDME|TFAP4|DLL1|CD200|ROBO1|CDKN1B|VSIG4|BMPR2|NIBAN2|IFI35|IL12B|GATA6|ETS1|CSF1R|LIMS2|SMAD3|P3H2|NPR1|SERPINF1|WT1|BMP2|SPEG|CDK6|SH3BP4|CAMK2N1|GATA3|IFIT3|ERBB4|MTSS1|PRNP|APOE|PDPN|SMAD7|BCL2|ANG|KLF13|ERBB2|EIF2AK2|NDFIP1|DDR1|PKN1|SOX10|ADORA1|FERMT1|SOX9|MEF2C|TMEM115|HES1|TGFBR2|COL18A1|F2R|SIX5|SOX11|MCC|B2M|FGF10|NKX3-1|SPARC|NFIB|MIR503|ZBTB7C|TP53|CT…	83	0.00306771
phosphate-containing compound metabolic process (GO:0006796)	biological_process	P1	FAM20C|EPHB2|ATP5MC2|PKIA|SIRPA|PLCL2|MTMR8|ZBED3|WWTR1|APOC1|RGS4|PTPN14|AMHR2|SULT1C4|PMEPA1|PAPSS1|MVP|PTPN5|IRS1|TFAP4|PGAM1|PLA2G7|TRIB2|INSRR|ROBO1|ABHD6|CDKN1B|SCD|PPP1CA|HSPB1|NUAK2|IMPDH2|BMPR2|IGF1R|CTDSP1|PTPRZ1|FGR|TWIST1|UCK2|GMPR|RPS3|ACTB|BCAR3|DCLK1|MAML1|YWHAB|ACSM3|PPP1R26|AJUBA|IL12B|TRIB3|PPIF|UQCRHL|PLCB3|INSR|ACHE|DSTYK|ARRB2|PGLS|SIK1|PPP2R1A|ACSL4|CAMKK2|GATA6|RNASEL|PLSCR…	277	0.00394623
phosphorus metabolic process (GO:0006793)	biological_process	P1	FAM20C|EPHB2|ATP5MC2|PKIA|SIRPA|PLCL2|MTMR8|ZBED3|WWTR1|APOC1|RGS4|PTPN14|AMHR2|SULT1C4|PMEPA1|PAPSS1|MVP|EXTL2|PTPN5|IRS1|TFAP4|PGAM1|PLA2G7|TRIB2|INSRR|ROBO1|ABHD6|CDKN1B|SCD|PPP1CA|HSPB1|NUAK2|IMPDH2|BMPR2|IGF1R|CTDSP1|PTPRZ1|FGR|TWIST1|UCK2|GMPR|RPS3|ACTB|BCAR3|DCLK1|MAML1|YWHAB|ACSM3|PPP1R26|AJUBA|IL12B|TRIB3|PPIF|UQCRHL|PLCB3|INSR|ACHE|DSTYK|ARRB2|PGLS|SIK1|PPP2R1A|ACSL4|CAMKK2|GATA6|RNASEL…	279	0.00424286
cellular protein modification process (GO:0006464)	biological_process	P1	NDN|FAM20C|CCDC22|EPHB2|MARCHF9|GGT1|PKIA|BLOC1S1|SIRPA|ST6GALNAC1|PLCL2|MTMR8|ZBED3|SOX4|WWTR1|RGS4|UBL4A|TRIM21|PTPN14|COLGALT2|AMHR2|B4GAT1|PMEPA1|MVP|RNF150|PPIB|EXTL2|PTPN5|GALNT18|FKBP9|TFAP4|DTX4|FBXL19|CKAP4|TRIB2|INSRR|ROBO1|ZNRF3|IGFBP4|CDKN1B|GALNT16|PPP1CA|HSPB1|NUAK2|BMPR2|IGF1R|OPN3|CTDSP1|PTPRZ1|FGR|TWIST1|EID1|RPS3|ACTB|BCAR3|TET1|DCLK1|TRIM47|MAML1|YWHAB|C1GALT1C1|PPP1R26|AJUBA|P…	353	0.00404166
protein modification process (GO:0036211)	biological_process	P1	NDN|FAM20C|CCDC22|EPHB2|MARCHF9|GGT1|PKIA|BLOC1S1|SIRPA|ST6GALNAC1|PLCL2|MTMR8|ZBED3|SOX4|WWTR1|RGS4|UBL4A|TRIM21|PTPN14|COLGALT2|AMHR2|B4GAT1|PMEPA1|MVP|RNF150|PPIB|EXTL2|PTPN5|GALNT18|FKBP9|TFAP4|DTX4|FBXL19|CKAP4|TRIB2|INSRR|ROBO1|ZNRF3|IGFBP4|CDKN1B|GALNT16|PPP1CA|HSPB1|NUAK2|BMPR2|IGF1R|OPN3|CTDSP1|PTPRZ1|FGR|TWIST1|EID1|RPS3|ACTB|BCAR3|TET1|DCLK1|TRIM47|MAML1|YWHAB|C1GALT1C1|PPP1R26|AJUBA|P…	353	0.00404166
macromolecule modification (GO:0043412)	biological_process	P1	NDN|FAM20C|CCDC22|EPHB2|MARCHF9|GGT1|PKIA|BLOC1S1|SIRPA|ST6GALNAC1|PLCL2|MTMR8|ZBED3|SOX4|WWTR1|RGS4|UBL4A|TRIM21|PTPN14|COLGALT2|AMHR2|B4GAT1|QTRT1|PMEPA1|MVP|RNF150|PPIB|EXTL2|PTPN5|GALNT18|FKBP9|TFAP4|DTX4|FBXL19|CKAP4|TRIB2|INSRR|ROBO1|ZNRF3|IGFBP4|CDKN1B|GALNT16|PPP1CA|HSPB1|NUAK2|BMPR2|IGF1R|NIBAN2|OPN3|CTDSP1|PTPRZ1|FGR|TWIST1|EID1|RPS3|ACTB|BCAR3|TET1|DCLK1|TRIM47|MAML1|YWHAB|C1GALT1C1|PP…	364	0.0129266
positive regulation of cell death (GO:0010942)	biological_process	P1	BMF|SOX4|GSN|GSDME|TFAP4|CDKN1B|PPP1CA|ARHGEF3|RPS3|IL12B|ARRB2|SIK1|BMP2|HRK|ANO6|TNFRSF12A|C1QA|RPL11|PYCARD|MTCH1|ARHGEF16|H19|PRNP|PLA2G1B|HSPD1|CALHM2|TRIO|NOTCH2|NOS2|BCL2|CSRNP3|DFFA|FYN|CDK5|ADORA1|ITGA6|VAV2|GRN|ID3|MEF2C|ALDH1A3|NGEF|CDK4|ATF3|EPHA7|SNCA|PRMT2|GADD45G|NKX3-1|IFIT2|ARL6IP5|DNMT3A|PHLDA3|CLIP3|SYK|TP53|CTNNA1|FOXO3|NCK2|ITM2C|TLE5|JUN|PREX1|OLFM1|MOAP1|INHBB|BAX|LRP1|TLR4…	72	0.011548
positive regulation of programmed cell death (GO:0043068)	biological_process	P1	BMF|SOX4|GSN|GSDME|TFAP4|PPP1CA|ARHGEF3|RPS3|IL12B|ARRB2|SIK1|BMP2|HRK|ANO6|TNFRSF12A|RPL11|PYCARD|MTCH1|ARHGEF16|H19|PRNP|PLA2G1B|HSPD1|CALHM2|TRIO|NOTCH2|NOS2|BCL2|CSRNP3|DFFA|CDK5|ITGA6|VAV2|GRN|ID3|MEF2C|ALDH1A3|NGEF|CDK4|ATF3|EPHA7|SNCA|PRMT2|GADD45G|NKX3-1|IFIT2|ARL6IP5|PHLDA3|CLIP3|SYK|TP53|CTNNA1|FOXO3|NCK2|ITM2C|TLE5|JUN|PREX1|OLFM1|MOAP1|INHBB|BAX|CTNNB1|AIFM2	64	0.029086
positive regulation of apoptotic process (GO:0043065)	biological_process	P1	BMF|SOX4|GSN|GSDME|TFAP4|PPP1CA|ARHGEF3|RPS3|IL12B|ARRB2|SIK1|BMP2|HRK|ANO6|TNFRSF12A|RPL11|PYCARD|MTCH1|ARHGEF16|H19|PRNP|PLA2G1B|HSPD1|CALHM2|TRIO|NOTCH2|BCL2|CSRNP3|DFFA|CDK5|ITGA6|VAV2|GRN|ID3|MEF2C|ALDH1A3|NGEF|CDK4|ATF3|EPHA7|SNCA|PRMT2|GADD45G|NKX3-1|IFIT2|ARL6IP5|PHLDA3|CLIP3|TP53|CTNNA1|FOXO3|NCK2|ITM2C|TLE5|JUN|PREX1|OLFM1|MOAP1|INHBB|BAX|CTNNB1|AIFM2	62	0.0350843
regulation of hydrolase activity (GO:0051336)	biological_process	P1	ARHGAP22|WFIKKN2|KLRK1|APOC1|RGS4|TBC1D9|RHOC|IFI6|GSN|TFAP4|CD200|ROBO1|RPS3|BCAR3|SERPINB8|ATP1B1|PPP1R26|AJUBA|PPIF|PFN1|ARRB2|PPP2R1A|ARAP2|PLSCR1|GNB5|RDX|SERPINH1|SMAD3|SPOCK2|OAS1|APOA1|PCSK6|NEDD9|HIP1|SERPINF1|BMP2|TNNI3|OPHN1|DOCK1|EPHA2|SH3BP4|APC2|ANOS1|PPP1R1A|ARHGAP1|PYCARD|MTCH1|ANTXR1|ARHGEF16|STMN3|MAPRE2|PRNP|ARHGAP24|PLA2G1B|HSPD1|PEBP1|IFI16|ARHGEF10L|RASAL1|F11R|MSH6|ANG|CSRN…	132	0.00407713
positive regulation of hydrolase activity (GO:0051345)	biological_process	P1	ARHGAP22|RGS4|TBC1D9|RHOC|GSN|TFAP4|CD200|ROBO1|RPS3|BCAR3|ATP1B1|PFN1|ARAP2|PLSCR1|GNB5|SMAD3|APOA1|NEDD9|HIP1|BMP2|OPHN1|DOCK1|EPHA2|APC2|ARHGAP1|PYCARD|MTCH1|ANTXR1|ARHGEF16|MAPRE2|ARHGAP24|PLA2G1B|HSPD1|IFI16|ARHGEF10L|RASAL1|F11R|MSH6|ANG|ERBB2|RIN2|RAPGEF3|ITGA2|FYN|CHML|ADPRH|ITGA6|VEGFA|GRN|ADAP2|PRKD1|MEF2C|SIPA1|RHOG|NGEF|RGS9|RINL|F2R|SNCA|EGLN3|ALDH1A1|FGF10|NKX3-1|SYDE1|CASP1|ARL6IP5…	79	0.0364001
cytokine production (GO:0001816)	biological_process	P1	SIRPA|TRIM21|CCBE1|DTX4|DLL1|CD200|TRIB2|VSIG4|HSPB1|FGR|TWIST1|RPS3|TSKU|IL12B|ARRB2|CD28|TRIM56|GATA6|STAT6|CSF1R|NLRC5|RELB|SMAD3|APOA1|ELANE|TICAM1|ITGAV|POLR3K|PANX1|LGR4|EPHA2|GATA3|PYCARD|INHA|H19|PRNP|PLA2G1B|HSPD1|S1PR3|IFI16|POSTN|PIK3R1|F11R|SMAD7|NOS2|NAV3|SERPINB1|EIF2AK2|NDFIP1|PLD3|PDE4D|FERMT1|GAS6|AXL|IL6R|CHI3L1|F2R|B2M|AFAP1L2|APPL1|SEMA7A|LTBP3|CD47|GATA4|CASP1|BCL3|FRMD8|SYK|…	89	0.00483131
regulation of cytokine production (GO:0001817)	biological_process	P1	SIRPA|TRIM21|CCBE1|DTX4|DLL1|CD200|TRIB2|VSIG4|HSPB1|FGR|TWIST1|RPS3|TSKU|IL12B|ARRB2|CD28|TRIM56|GATA6|STAT6|CSF1R|NLRC5|RELB|SMAD3|APOA1|ELANE|TICAM1|ITGAV|POLR3K|PANX1|LGR4|EPHA2|GATA3|PYCARD|INHA|H19|PRNP|PLA2G1B|HSPD1|S1PR3|IFI16|POSTN|PIK3R1|F11R|SMAD7|NOS2|NAV3|SERPINB1|EIF2AK2|NDFIP1|PLD3|PDE4D|FERMT1|GAS6|AXL|IL6R|F2R|B2M|AFAP1L2|APPL1|SEMA7A|CD47|GATA4|CASP1|BCL3|FRMD8|SYK|TRIM16|GPRC5B…	85	0.00532713
regulation of cellular component biogenesis (GO:0044087)	biological_process	P1	BMF|EPHB2|RHOC|PMEPA1|MSN|GSN|RAB17|PLEK2|UBQLN2|RPS3|TET1|HAS3|AJUBA|PFN1|YAP1|ABCA1|PRKCA|RDX|SMAD3|APOA1|IL1RAPL2|LIMCH1|TICAM1|TWF2|MDGA1|NBDY|CDC42EP4|HRK|NLGN2|EPHA2|DPYSL3|PYCARD|ANTXR1|LRFN3|RAC2|ARHGAP24|APOE|CHMP4C|ARHGEF10L|PIK3R1|LRFN5|F11R|NAV3|SLITRK6|TACSTD2|FAM107A|CGNL1|EIF2AK2|CAMSAP3|RAPGEF3|ADPRH|FAM110C|PLCE1|CORO2B|VEGFA|FSCN1|FERMT1|SVIL|RALB|VCL|SOX9|MEF2C|RHOG|MMP14|PALM|…	103	0.00607227
leukocyte differentiation (GO:0002521)	biological_process	P1	PATZ1|CCR1|PLCL2|SOX4|DLL1|MR1|TMEM176B|EFNA2|GLI2|IL12B|LGALS1|CD28|DTX1|SOX13|SH3PXD2A|PRKCA|ZFP36L2|CSF1R|RELB|TMEM176A|IFNE|ZFP36L1|CDK6|EPHA2|GATA3|NFKBID|INHA|IFI16|ZMIZ1|C1QC|PIK3R1|PIR|NOTCH2|SMAD7|BCL2|ERBB2|LFNG|NDFIP1|FLT3|VEGFA|MMP14|PRDX2|GAS6|AXL|IL6R|TGFBR2|SH3RF1|B2M|GLO1|MYH9|BCL3|GAB2|SYK|TP53|JUN|PREX1|CMTM7|BAX|JAK3|CR1|TLR4	61	0.0154741
immune system development (GO:0002520)	biological_process	P1	PATZ1|CCR1|PLCL2|SOX4|TCF21|MOV10|DLL1|MR1|TMEM176B|EFNA2|GLI2|IL12B|LGALS1|CD28|DTX1|SOX13|YAP1|SH3PXD2A|ETS1|SMAD5|LRP5|PRKCA|ZFP36L2|XKR8|CSF1R|RELB|TMEM176A|SMAD3|IFNE|ZFP36L1|KIRREL3|CDK6|EPHA2|GATA3|GP1BA|NFKBID|INHA|DNASE2|HSPD1|IFI16|ZMIZ1|EPAS1|C1QC|PIK3R1|PDPN|PIR|NOTCH2|SMAD7|BCL2|MSH6|KLF13|ERBB2|EIF2AK2|LFNG|RPS14|NDFIP1|PKN1|FLT3|VEGFA|PTBP3|MEF2C|TAFAZZIN|MMP14|PRDX2|GAS6|HES1|AXL|…	99	0.0341457
hematopoietic or lymphoid organ development (GO:0048534)	biological_process	P1	PATZ1|CCR1|PLCL2|SOX4|TCF21|MOV10|DLL1|MR1|TMEM176B|EFNA2|GLI2|IL12B|LGALS1|CD28|DTX1|SOX13|YAP1|SH3PXD2A|ETS1|SMAD5|LRP5|PRKCA|ZFP36L2|CSF1R|RELB|TMEM176A|IFNE|ZFP36L1|KIRREL3|CDK6|EPHA2|GATA3|GP1BA|NFKBID|INHA|DNASE2|IFI16|ZMIZ1|EPAS1|C1QC|PIK3R1|PDPN|PIR|NOTCH2|SMAD7|BCL2|KLF13|ERBB2|EIF2AK2|LFNG|RPS14|NDFIP1|PKN1|FLT3|VEGFA|PTBP3|MEF2C|TAFAZZIN|MMP14|PRDX2|GAS6|HES1|AXL|IL6R|TGFBR2|SH3RF1|NFE…	93	0.0441172
regulation of immune system process (GO:0002682)	biological_process	P1	GGT1|C6|SIRPA|CCR1|PLCL2|KLRK1|SOX4|TRIM21|MOV10|MSN|THEMIS2|DLL1|MR1|PLA2G7|CD200|TMEM176B|VSIG4|GLI2|FGR|RPS3|ACTB|COL1A1|NONO|IFI35|IL12B|LGALS1|ARRB2|CD28|DTX1|SOX13|GATA6|RNASEL|PLSCR1|ETS1|PRKCA|ZFP36L2|COL3A1|CSF1R|NLRC5|RELB|TMEM176A|SMAD3|APOA1|ELANE|TICAM1|COLEC12|ZFP36L1|PARP14|SH3KBP1|DOCK1|AQP3|USP18|CDK6|GATA3|CD38|TNFSF13B|ANO6|GP1BA|NFKBID|C1QA|PYCARD|SLC8B1|RAC2|INHA|PRNP|PLA2G1B…	154	0.00699578
nitrogen compound transport (GO:0071705)	biological_process	P1	ILDR2|CDH1|BMF|CCDC22|PKIA|TVP23A|LCA5|CLTB|SOX4|RPS4Y1|RGS4|PTPN14|TBC1D9|RPS3A|MVP|RAB17|IRS1|RPL39|CD200|ECH1|CBLIF|ATP8A1|HSPB1|CD63|RPS3|ACTB|SLC25A4|ATP1B1|YWHAB|COL1A1|YWHAH|SNX21|RPL29|IL12B|ACHE|ABCG2|RPS16|ARRB2|RAB20|ENHO|KIF3C|MVB12A|SLC38A2|REEP2|ACSL4|ABCA1|HNRNPA1|GPR27|LRP5|PRKCA|RPL35|DAB2|SLC48A1|RAB6A|RAB33B|TOMM40|SMAD3|RPS28|RPS13|RHBDF1|HIP1|CTSA|TOMM40L|RPL12|NUCB1|RPS4X|ZF…	209	0.0219046
anion transport (GO:0006820)	biological_process	P1	ILDR2|CDH1|BMF|CCDC22|OSBPL7|PKIA|TVP23A|LCA5|CLTB|SOX4|APOC1|RPS4Y1|RGS4|PTPN14|TBC1D9|RPS3A|ATP10D|MVP|RAB17|IRS1|RPL39|CD200|ECH1|CBLIF|ATP8A1|HSPB1|CD63|OPN3|SLC22A9|APOL2|RPS3|ACTB|SLC25A4|ATP1B1|TSKU|YWHAB|COL1A1|YWHAH|SNX21|RPL29|LRP10|IL12B|TRIB3|SLC4A2|INSR|ESYT1|ACHE|ABCG2|RPS16|ARRB2|RAB20|ENHO|KIF3C|MVB12A|SLC38A2|REEP2|ACSL4|RNASEL|PLSCR1|ABCA1|HNRNPA1|GPR27|LRP5|PRKCA|RPL35|DAB2|XKR…	257	0.0139503
organic substance transport (GO:0071702)	biological_process	P1	ILDR2|CDH1|BMF|CCDC22|OSBPL7|PKIA|TVP23A|LCA5|CLTB|SOX4|APOC1|RPS4Y1|RGS4|PTPN14|TBC1D9|RPS3A|ATP10D|MVP|RAB17|IRS1|RPL39|CD200|ECH1|CBLIF|ATP8A1|HSPB1|CD63|OPN3|SLC22A9|APOL2|RPS3|ACTB|SLC25A4|ATP1B1|TSKU|YWHAB|COL1A1|YWHAH|SNX21|RPL29|LRP10|IL12B|TRIB3|SLC4A2|INSR|ESYT1|ACHE|ABCG2|RPS16|ARRB2|RAB20|ENHO|KIF3C|MVB12A|SLC38A2|REEP2|ACSL4|RNASEL|PLSCR1|ABCA1|HNRNPA1|GPR27|LRP5|PRKCA|RPL35|DAB2|XKR…	249	0.00884841
ion transport (GO:0006811)	biological_process	P1	CAPN1|ILDR2|CDH1|BMF|CCDC22|EPHB2|ATP5MC2|OSBPL7|PKIA|TVP23A|CCR1|LCA5|CLTB|SOX4|APOC1|RPS4Y1|KCNJ5|RGS4|PTPN14|TBC1D9|RPS3A|ATP10D|SLC22A17|MVP|RAB17|IRS1|RPL39|CD200|SCN9A|ECH1|CBLIF|ATP8A1|HSPB1|CD63|OPN3|SLC22A9|TWIST1|MAGED2|APOL2|TRPC3|RPS3|ACTB|LRRC38|SLC25A4|ATP1B1|TSKU|PLLP|YWHAB|COL1A1|YWHAH|KCNQ1|SNX21|RPL29|LRP10|IL12B|TRIB3|PPIF|SLC4A2|INSR|ESYT1|ACHE|ABCG2|RPS16|ARRB2|RAB20|ENHO|KIF…	319	0.00950687
amide transport (GO:0042886)	biological_process	P1	ILDR2|CDH1|BMF|CCDC22|PKIA|TVP23A|LCA5|CLTB|SOX4|RPS4Y1|PTPN14|TBC1D9|RPS3A|MVP|RAB17|IRS1|RPL39|CD200|ECH1|HSPB1|CD63|RPS3|SLC25A4|ATP1B1|YWHAB|COL1A1|YWHAH|SNX21|RPL29|IL12B|ACHE|ABCG2|RPS16|ARRB2|RAB20|ENHO|KIF3C|MVB12A|REEP2|ACSL4|ABCA1|GPR27|LRP5|PRKCA|RPL35|DAB2|RAB6A|RAB33B|TOMM40|SMAD3|RPS28|RPS13|RHBDF1|HIP1|CTSA|TOMM40L|RPL12|NUCB1|RPS4X|NPY2R|OPHN1|RPL18A|AQP3|STEAP3|RPLP2|KLF7|NLGN2|R…	182	0.0270524
protein transport (GO:0015031)	biological_process	P1	ILDR2|CDH1|BMF|CCDC22|PKIA|TVP23A|LCA5|CLTB|SOX4|RPS4Y1|PTPN14|TBC1D9|RPS3A|MVP|RAB17|IRS1|RPL39|CD200|ECH1|HSPB1|CD63|RPS3|SLC25A4|ATP1B1|YWHAB|COL1A1|YWHAH|SNX21|RPL29|IL12B|ACHE|RPS16|ARRB2|RAB20|ENHO|KIF3C|MVB12A|REEP2|ACSL4|ABCA1|GPR27|LRP5|PRKCA|RPL35|DAB2|RAB6A|RAB33B|TOMM40|SMAD3|RPS28|RPS13|RHBDF1|HIP1|CTSA|TOMM40L|RPL12|NUCB1|RPS4X|OPHN1|RPL18A|STEAP3|RPLP2|KLF7|NLGN2|RPL36|MGARP|RPS5|C…	175	0.0341457
peptide transport (GO:0015833)	biological_process	P1	ILDR2|CDH1|BMF|CCDC22|PKIA|TVP23A|LCA5|CLTB|SOX4|RPS4Y1|PTPN14|TBC1D9|RPS3A|MVP|RAB17|IRS1|RPL39|CD200|ECH1|HSPB1|CD63|RPS3|SLC25A4|ATP1B1|YWHAB|COL1A1|YWHAH|SNX21|RPL29|IL12B|ACHE|RPS16|ARRB2|RAB20|ENHO|KIF3C|MVB12A|REEP2|ACSL4|ABCA1|GPR27|LRP5|PRKCA|RPL35|DAB2|RAB6A|RAB33B|TOMM40|SMAD3|RPS28|RPS13|RHBDF1|HIP1|CTSA|TOMM40L|RPL12|NUCB1|RPS4X|NPY2R|OPHN1|RPL18A|STEAP3|RPLP2|KLF7|NLGN2|RPL36|MGARP|…	178	0.0350843
lipid biosynthetic process (GO:0008610)	biological_process	P1	OSBPL7|MTMR8|APOC1|KDSR|CCDC3|ABHD6|SCD|DGAT2L6|ACSM3|AJUBA|TRIB3|ACHE|ENHO|SIK1|ST8SIA5|ACSL4|PLSCR1|PCYT1B|ST3GAL2|HSD17B3|ST6GALNAC4|APOA1|SERINC5|BMP2|LIPH|HSD17B11|LPIN3|FADS2|FADS3|PRPF19|SYNJ2|TM7SF2|PLA2G1B|FADS1|APOE|ABCA8|SLC44A1|PIK3R1|ABCG1|PLD2|ANG|CPNE3|CERS4|MID1IP1|PLA2G12A|PLCE1|HSD11B2|SREBF2|LDLR|CDIPT|GAL3ST4|TSPOAP1|PRKD1|TAFAZZIN|ALDH1A3|FAM3A|PLEKHA2|CDK4|MBTPS2|CYP27A1|NR5…	81	0.00897921
lipid metabolic process (GO:0006629)	biological_process	P1	GGT1|OSBPL7|PLCL2|MTMR8|APOC1|KDSR|CCDC3|IRS1|CYP2A6|PLA2G7|ECH1|ABHD6|SCD|DGAT2L6|FGR|TWIST1|APOL2|TSKU|ACSM3|YWHAH|LRP10|AJUBA|TRIB3|PLCB3|ESYT1|ACHE|ENHO|SIK1|PPP2R1A|ST8SIA5|LSR|ACSL4|GATA6|PLSCR1|PCYT1B|ABCA1|ST3GAL2|LRP5|HSD17B3|LIMA1|CSF1R|ST6GALNAC4|APOA1|FAAH2|SULT1A2|GSTA1|NCOA2|SERINC5|CTSA|PLCXD3|BMP2|LIPH|HSD17B11|PRKAR2B|LPIN3|FADS2|PRDX6|FADS3|PRPF19|NCOR2|SYNJ2|TM7SF2|DHRS3|PLA2G1…	139	0.0239465
inflammatory response (GO:0006954)	biological_process	P1	GGT1|SIRPA|CASP4|CCR1|THEMIS2|PLA2G7|CD200|SCN9A|LY75|IGFBP4|APOL2|IFI35|IL12B|CD28|ZYX|PLSCR1|ETS1|IL10RB|CSF1R|RELB|SMAD3|APOA1|ELANE|TICAM1|SERPINF1|BMP2|USP18|EPHA2|GATA3|ANO6|NFKBID|PYCARD|H19|S1PR3|APOE|IFI16|EDNRB|LRFN5|NOTCH2|F11R|SHPK|NOS2|SOCS3|NDFIP1|ITGA2|PLD3|ADORA1|LDLR|GRN|STAB1|PRKD1|PRDX2|AXL|IL6R|TNIP1|CHI3L1|F2R|SNCA|NFE2L2|CXCR4|SMPDL3B|AFAP1L2|PLA2G4C|IRAK2|ASS1|PLGRKT|APPL1|…	83	0.00947891
cellular macromolecule localization (GO:0070727)	biological_process	P1	CDH1|BMF|EPHB2|PKIA|LCA5|CLTB|CNPY4|WWTR1|RPS4Y1|UBL4A|PTPN14|TBC1D9|RPS3A|MSN|GSN|RAB17|RPL39|ECH1|FRMPD1|HSPB1|PCARE|CD63|RPS3|ACTB|ATP1B1|DCLK1|YWHAB|COL1A1|YWHAH|RPL29|AJUBA|RPS16|RAB20|KIF3C|REEP2|YAP1|RPL35|RDX|DAB2|RAB6A|RAB33B|TOMM40|SMAD3|EMP2|RPS28|RPS13|CTSA|TOMM40L|RPL12|NUCB1|RPS4X|ZFP36L1|TWF2|OPHN1|RPL18A|RPLP2|NLGN2|RPL36|MGARP|EPHA2|SH3BP4|RPS5|GLRB|RPL8|RPL11|PRPF19|ERBB4|ARHGEF…	189	0.00980151
cellular protein localization (GO:0034613)	biological_process	P1	CDH1|BMF|EPHB2|PKIA|LCA5|CLTB|CNPY4|WWTR1|RPS4Y1|UBL4A|PTPN14|TBC1D9|RPS3A|MSN|GSN|RAB17|RPL39|ECH1|FRMPD1|HSPB1|PCARE|CD63|RPS3|ACTB|ATP1B1|DCLK1|YWHAB|COL1A1|YWHAH|RPL29|AJUBA|RPS16|RAB20|KIF3C|REEP2|YAP1|RPL35|RDX|DAB2|RAB6A|RAB33B|TOMM40|SMAD3|EMP2|RPS28|RPS13|CTSA|TOMM40L|RPL12|NUCB1|RPS4X|TWF2|OPHN1|RPL18A|RPLP2|NLGN2|RPL36|MGARP|EPHA2|SH3BP4|RPS5|GLRB|RPL8|RPL11|PRPF19|ERBB4|ARHGEF16|RPL10…	188	0.0103114
homeostatic process (GO:0042592)	biological_process	P1	NDN|ILDR2|CCDC22|CCR1|LCA5|PLCL2|SOX4|WWTR1|IFI6|SLC22A17|ADAMTS5|IRS1|DLL1|ABHD6|SCD|HSPB1|IGF1R|TRPC3|ACTB|ATP1B1|TSKU|ACSM3|ADRB3|SLC4A2|INSR|LGALS1|ACHE|ABCG2|RAB20|LSR|SLC41A1|YAP1|ABCA1|ETS1|HNRNPA1|SMAD5|GPR27|LRP5|PRKCA|NUCKS1|LIMA1|STAT6|CSF1R|SMAD3|OAS1|APOA1|ELANE|SLC4A3|LAMA2|ZFP36L1|NPR1|C19orf12|ITGAV|SERPINF1|NPY2R|TNNI3|AQP3|STEAP3|PRKAR2B|PRDX6|KLF7|CDK6|LGR4|CAMK2N1|GATA3|CD38|T…	183	0.00995268
macromolecule catabolic process (GO:0009057)	biological_process	P1	LSM7|CAPN1|CDH1|CCDC22|VGLL4|OSBPL7|H1-0|NAGLU|WWTR1|RPS4Y1|RPS3A|MOV10|MSN|RNF150|UBQLN2|FBXL19|RPL39|ZC3HAV1|TRIB2|ZNRF3|CDKN1B|PPP1CA|HSPB1|RPS3|YWHAB|RPL29|TRIB3|CSDC2|PJA1|SGSH|RPS16|ARRB2|ANP32A|MVB12A|PPP2R1A|USP22|RNASEL|PRKCA|ZFP36L2|RPL35|RDX|DAB2|MAGEF1|USP13|RNF43|SMAD3|ELANE|RPS28|RPS13|RHBDF1|TMUB1|CTSA|RPL12|RPS4X|ZFP36L1|OPHN1|RPL18A|USP9Y|NBDY|RPLP2|USP18|RPL36|RPS5|ARAF|APC2|ADA…	142	0.0116054
cellular macromolecule catabolic process (GO:0044265)	biological_process	P1	LSM7|CCDC22|VGLL4|OSBPL7|H1-0|WWTR1|RPS4Y1|RPS3A|MOV10|MSN|RNF150|UBQLN2|FBXL19|RPL39|ZC3HAV1|TRIB2|ZNRF3|HSPB1|RPS3|YWHAB|RPL29|TRIB3|CSDC2|SGSH|RPS16|ARRB2|ANP32A|MVB12A|PPP2R1A|USP22|RNASEL|PRKCA|ZFP36L2|RPL35|RDX|DAB2|MAGEF1|USP13|RNF43|RPS28|RPS13|RHBDF1|TMUB1|RPL12|RPS4X|ZFP36L1|OPHN1|RPL18A|USP9Y|NBDY|RPLP2|USP18|RPL36|RPS5|ARAF|ADAMTS9|ADAMTS7|RPL8|RPL11|PRPF19|RPL10A|DNASE2|APOE|CHMP4C|N…	118	0.0364001
negative regulation of cell death (GO:0060548)	biological_process	P1	SOX4|RPS3A|IFI6|DLL1|CD200|HSPB1|NUAK2|IGF1R|NIBAN2|OPN3|GLI2|PTPRZ1|TWIST1|SLC25A4|NONO|PPIF|DSTYK|ARRB2|CD28|GATA6|YAP1|PRKCA|DAB2|CBX4|CSF1R|LIMS2|CHST11|SMAD3|VDAC1|TDGF1|ITGAV|SERPINF1|WT1|CNTFR|GATA3|ERBB3|ARAF|CD38|IFIT3|HSPD1|APOE|TOX3|EDNRB|ZFPM2|PIK3R1|PDPN|NOTCH2|BCL2|GRK5|TMEM109|CITED1|NES|SOCS3|DFFA|FYN|CDK5|SOX10|TMEM14A|ADORA1|ITGA6|VEGFA|GRN|PRKD1|SOX9|MEF2C|ENO1|PRDX2|GAS6|AXL|M…	101	0.0134508
negative regulation of programmed cell death (GO:0043069)	biological_process	P1	RPS3A|IFI6|DLL1|HSPB1|NUAK2|IGF1R|NIBAN2|OPN3|GLI2|PTPRZ1|TWIST1|SLC25A4|NONO|PPIF|DSTYK|ARRB2|CD28|GATA6|YAP1|PRKCA|DAB2|CBX4|CSF1R|LIMS2|CHST11|SMAD3|VDAC1|TDGF1|ITGAV|WT1|CNTFR|GATA3|ERBB3|ARAF|CD38|IFIT3|HSPD1|APOE|TOX3|EDNRB|PIK3R1|PDPN|NOTCH2|BCL2|GRK5|CITED1|NES|SOCS3|DFFA|FYN|SOX10|TMEM14A|ADORA1|ITGA6|VEGFA|GRN|SOX9|MEF2C|ENO1|PRDX2|GAS6|AXL|MAG|PPIA|SH3RF1|F2R|SNCA|NFE2L2|THOC6|FGF10|HE…	92	0.0210927
negative regulation of apoptotic process (GO:0043066)	biological_process	P1	RPS3A|IFI6|DLL1|HSPB1|NUAK2|IGF1R|NIBAN2|OPN3|GLI2|PTPRZ1|TWIST1|NONO|PPIF|DSTYK|ARRB2|CD28|GATA6|YAP1|PRKCA|DAB2|CBX4|CSF1R|LIMS2|CHST11|SMAD3|VDAC1|TDGF1|ITGAV|WT1|CNTFR|GATA3|ERBB3|ARAF|CD38|IFIT3|HSPD1|APOE|TOX3|EDNRB|PIK3R1|PDPN|NOTCH2|BCL2|GRK5|CITED1|NES|SOCS3|DFFA|FYN|SOX10|TMEM14A|ADORA1|ITGA6|VEGFA|GRN|SOX9|MEF2C|ENO1|PRDX2|GAS6|AXL|MAG|PPIA|SH3RF1|F2R|SNCA|NFE2L2|THOC6|FGF10|HEY2|GLO1|…	90	0.0231406
negative regulation of gene expression (GO:0010629)	biological_process	P1	LSM7|SIRPA|CCR1|H1-0|RPS4Y1|RPS3A|MOV10|CCDC3|H1-10|DLL1|RPL39|CD200|ZC3HAV1|TRIB2|ROBO1|VSIG4|HSPB1|TWIST1|RPS3|TSKU|YWHAB|KCNQ1|RPL29|AJUBA|IL12B|CSDC2|KDM4A|RPS16|ARRB2|CD28|ANP32A|PPP2R1A|DNM3OS|GATA6|RNASEL|YAP1|PRKCA|ZFP36L2|RPL35|NLRC5|RELB|SMAD3|APOA1|ELANE|RPS28|RPS13|RPL12|RPS4X|ZFP36L1|GRB7|PARP14|SERPINF1|BMP2|RPL18A|NBDY|MIRLET7D|RPLP2|RPL36|LGR4|EPHA2|RPS5|GATA3|RPL8|RPL11|PYCARD|NC…	152	0.0147663
regulation of transcription by RNA polymerase II (GO:0006357)	biological_process	P1	NDN|ZNF219|PATZ1|ZNF347|PKIA|ATF7|ZNF835|ZBED3|H1-0|STOX2|SOX4|PHF6|WWTR1|ZFHX3|IRF2|TCF21|CREB3L4|THAP11|TFAP4|DLL1|FBXL19|ZNF493|TSC22D4|BMPR2|GLI2|DPF3|CHD6|CTDSP1|TWIST1|EID1|CXXC5|TET1|MAML3|NFIC|MAML1|NFIA|FOXJ2|NKX6-3|AJUBA|TRIB3|TFEB|CD28|SOX13|KLF3|GATA6|RNASEL|YAP1|PLSCR1|FBP1|ETS1|ZNF536|SMAD5|CC2D1A|LRP5|DEAF1|NUCKS1|DAB2|ZBTB8A|CBX4|STAT6|ZNF48|NLRC5|RELB|SMAD3|ARID5B|ELANE|NCOA2|HR|…	232	0.0164502
transcription by RNA polymerase II (GO:0006366)	biological_process	P1	NDN|ZNF219|PATZ1|ZNF347|PKIA|ATF7|ZNF835|ZBED3|H1-0|STOX2|SOX4|PHF6|WWTR1|ZFHX3|IRF2|TCF21|CREB3L4|THAP11|TFAP4|DLL1|FBXL19|ZNF493|TSC22D4|BMPR2|GLI2|DPF3|CHD6|CTDSP1|TWIST1|EID1|CXXC5|TET1|MAML3|NFIC|MAML1|NFIA|FOXJ2|NKX6-3|AJUBA|TRIB3|TFEB|ARRB2|CD28|DTX1|SOX13|KLF3|GATA6|RNASEL|YAP1|PLSCR1|FBP1|ETS1|ZNF536|SMAD5|CC2D1A|LRP5|DEAF1|NUCKS1|DAB2|ZBTB8A|CBX4|STAT6|ZNF48|NLRC5|RELB|SMAD3|ARID5B|ELAN…	239	0.0465054
immune response (GO:0006955)	biological_process	P1	CAPN1|C6|SIRPA|CASP4|CCR1|PLCL2|IFITM2|KLRK1|TRIM21|IRF2|IFI6|MVP|GSN|RAB17|IFI44|THEMIS2|DLL1|RPL39|MR1|CKAP4|PGAM1|CD200|ZC3HAV1|LY75|VSIG4|ATP8A1|IMPDH2|IGF1R|CD63|FGR|RPS3|ACTB|COL1A1|NONO|IFI35|IL12B|LGALS1|TFEB|ARRB2|RAB20|CD28|PLEKHO2|ANXA3|TRIM56|GATA6|ZYX|RNASEL|PLSCR1|ETS1|APBB1IP|COL3A1|IL10RB|CSF1R|RAB6A|NLRC5|RELB|SMAD3|EMP2|OAS1|APOA1|ELANE|GHDC|TICAM1|IFNE|SERINC5|CTSA|COLEC12|TDGF…	210	0.0186211
vesicle-mediated transport (GO:0016192)	biological_process	P1	CAPN1|CCDC22|BLOC1S1|SIRPA|TVP23A|CCR1|CLTB|SAMD9|APOC1|DPYSL2|MVP|MSN|GSN|RAB17|UBQLN2|DLL1|CKAP4|PGAM1|LY75|ATP8A1|IMPDH2|IGF1R|CD63|FGR|MAGED2|ACTB|DCLK1|LRP10|CD302|INSR|TLN1|ACHE|ARRB2|RAB20|PLEKHO2|KIF3C|ANXA3|MVB12A|PLSCR1|ABCA1|LRP5|RIMS3|RDX|DAB2|XKR8|SCARA3|RAB6A|RAB33B|EMP2|APOA1|ELANE|GHDC|HIP1|CTSA|COLEC12|ITGAV|SH3KBP1|ERGIC1|SH3GL1|OPHN1|DOCK1|PRDX6|TINAGL1|NLGN2|SH3BP4|CLEC4M|ADAM…	199	0.0210828
defense response (GO:0006952)	biological_process	P1	GGT1|C6|SIRPA|CASP4|CCR1|IFITM2|KLRK1|TRIM21|IRF2|IFI6|MOV10|GSN|ADAMTS5|THEMIS2|RPL39|MR1|PLA2G7|CD200|ZC3HAV1|SCN9A|LY75|IGFBP4|VSIG4|FGR|APOL2|NONO|IFI35|IL12B|ARRB2|RAB20|CD28|ANXA3|TRIM56|ZYX|RNASEL|PLSCR1|ETS1|IL10RB|STAT6|CSF1R|NLRC5|RELB|SMAD3|OAS1|APOA1|ELANE|TICAM1|IFNE|SERINC5|VDAC1|COLEC12|TDGF1|PARP14|SERPINF1|NPY2R|BMP2|POLR3K|CDC42EP4|USP18|LGR4|EPHA2|CLEC4M|GATA3|IFIT3|ANO6|NFKBID…	167	0.0213574
response to biotic stimulus (GO:0009607)	biological_process	P1	GGT1|C6|SIRPA|CASP4|IFITM2|KLRK1|TRIM21|IRF2|IFI6|MOV10|GSN|GSDME|ADAMTS5|IFI44|RPL39|MR1|ZC3HAV1|VSIG4|HSPB1|FGR|DCLK1|NONO|IFI35|IL12B|ARRB2|RAB20|ANXA3|TRIM56|GATA6|ZYX|RNASEL|YAP1|PLSCR1|PRKCA|IL10RB|CSF1R|NLRC5|RELB|OAS1|ELANE|TICAM1|IFNE|SERINC5|COLEC12|TDGF1|PARP14|BMP2|POLR3K|CDC42EP4|USP18|CDK6|LGR4|EPHA2|CLEC4M|GATA3|IFIT3|C1QA|PYCARD|H19|PLA2G1B|HSPD1|APOE|IFI16|EDNRB|RBMS3|C1QC|NOTCH2…	149	0.0390422
regulation of response to external stimulus (GO:0032101)	biological_process	P1	SEMA6A|EPHB2|GGT1|SIRPA|CASP4|CCR1|KLRK1|TRIM21|PLA2G7|CD200|ROBO1|ZSWIM5|VSIG4|HSPB1|BMPR2|SEMA4C|FGR|NONO|IFI35|IL12B|ARRB2|CD28|GATA6|ZYX|RNASEL|PLSCR1|ETS1|PRKCA|SEMA6B|CSF1R|NLRC5|RELB|SMAD3|APOA1|ELANE|PARP14|SERPINF1|USP18|GATA3|STK24|ANO6|GP1BA|PYCARD|SLC8B1|FNTB|RAC2|APOE|IFI16|EDNRB|ZSWIM4|LRFN5|SHPK|SOCS3|NDFIP1|ITGA2|FYN|ADORA1|LDLR|VEGFA|CD9|GRN|PRKD1|FAM3A|PRDX2|GAS6|IL6R|TNIP1|TGFB…	103	0.0332723
cell-substrate junction (GO:0030055)	cellular_component	P1	CAPN1|ARHGAP22|FLNB|IRF2|RPS3A|MSN|GSN|PPIB|FAT1|HSPB1|FZD2|RPS3|ACTB|BCAR3|YWHAB|TPM4|AJUBA|SLC4A2|TLN1|RPS16|PFN1|ZYX|APBB1IP|RDX|DAB2|LIMA1|LIMS2|FZD1|RPS13|NEDD9|RPL12|RPS4X|GRB7|ITGAV|SH3KBP1|SNTB1|ITGB5|RPLP2|ITGA8|EPHA2|RPS5|TNFSF13B|RPL8|TNS3|RPL10A|RAC2|MAPRE2|ARHGAP24|TLE2|CPNE3|FAM107A|RPL6|RPS14|PROCR|ITGA2|ITGA6|CORO2B|CD9|FERMT1|SVIL|RPS15|VCL|RHOG|MMP14|RPL23|PPIA|SYNE2|ANXA6|ITGA3…	97	3.88993e-20
focal adhesion (GO:0005925)	cellular_component	P1	CAPN1|ARHGAP22|FLNB|IRF2|RPS3A|MSN|GSN|PPIB|FAT1|HSPB1|FZD2|RPS3|ACTB|BCAR3|YWHAB|TPM4|AJUBA|SLC4A2|TLN1|RPS16|PFN1|ZYX|APBB1IP|RDX|DAB2|LIMA1|LIMS2|FZD1|RPS13|NEDD9|RPL12|RPS4X|GRB7|ITGAV|SH3KBP1|SNTB1|ITGB5|RPLP2|ITGA8|EPHA2|RPS5|TNFSF13B|RPL8|TNS3|RPL10A|RAC2|MAPRE2|ARHGAP24|TLE2|CPNE3|FAM107A|RPL6|RPS14|PROCR|ITGA2|ITGA6|CORO2B|CD9|FERMT1|SVIL|RPS15|VCL|RHOG|MMP14|RPL23|PPIA|SYNE2|ANXA6|ITGA3…	96	3.88993e-20
anchoring junction (GO:0070161)	cellular_component	P1	CAPN1|CDH1|KIRREL1|ARHGAP22|FLNB|IRF2|RPS3A|MSN|GSN|PPIB|FAT1|DLL1|PPP1CA|HSPB1|BMPR2|FZD2|NIBAN2|RPS3|ACTB|BCAR3|ATP1B1|YWHAB|CDH19|YWHAH|TPM4|AJUBA|SLC4A2|TLN1|RPS16|PFN1|LSR|ZYX|APBB1IP|RDX|DAB2|LIMA1|LIMS2|FZD1|RPS13|NEDD9|AMOTL2|RPL12|RPS4X|GRB7|KIRREL3|ITGAV|SH3KBP1|SNTB1|ITGB5|CDC42EP4|AQP3|PDLIM3|RPLP2|ITGA8|PANX1|EPHA2|RPS5|TNFSF13B|RPL8|CCDC85B|TNS3|RPL10A|RAC2|MAPRE2|ARHGAP24|TLE2|FRMD…	144	1.03976e-18
extracellular exosome (GO:0070062)	cellular_component	P1	EEF1A1P5|FAM20C|CAPN1|CDH1|WNT6|DDAH1|GGT1|C6|SIRPA|GIPC2|FLNB|GNG2|NAGLU|B4GAT1|RHOC|RPS3A|ARSL|DPYSL2|MVP|MSN|GSN|PPIB|RAB17|FAT1|S100A16|CKAP4|PGAM1|ECH1|LY75|PPP1CA|ATP8A1|HSPB1|IMPDH2|NIBAN2|CD63|CTDSP1|FGR|RPS3|ACTB|SERPINB8|ATP1B1|YWHAB|C1GALT1C1|MYL12A|FAT4|YWHAH|TPM4|BCAM|INSR|MYL6|TLN1|LGALS1|CHST14|SGSH|RPS16|MXRA5|PFN1|PGLS|ANXA3|MVB12A|PPP2R1A|LSR|HSP90AB3P|ACSL4|PLSCR1|FBP1|HNRNPA1|…	273	2.58851e-16
extracellular vesicle (GO:1903561)	cellular_component	P1	EEF1A1P5|FAM20C|CAPN1|CDH1|WNT6|DDAH1|GGT1|C6|SIRPA|GIPC2|FLNB|GNG2|NAGLU|B4GAT1|RHOC|RPS3A|ARSL|DPYSL2|MVP|MSN|GSN|PPIB|RAB17|FAT1|S100A16|CKAP4|PGAM1|ECH1|LY75|PPP1CA|ATP8A1|HSPB1|IMPDH2|NIBAN2|CD63|CTDSP1|FGR|RPS3|ACTB|SERPINB8|ATP1B1|YWHAB|C1GALT1C1|MYL12A|FAT4|YWHAH|TPM4|BCAM|INSR|MYL6|TLN1|LGALS1|CHST14|SGSH|RPS16|MXRA5|PFN1|PGLS|ANXA3|MVB12A|PPP2R1A|LSR|HSP90AB3P|ACSL4|PLSCR1|FBP1|HNRNPA1|…	279	4.35152e-16
extracellular organelle (GO:0043230)	cellular_component	P1	EEF1A1P5|FAM20C|CAPN1|CDH1|WNT6|DDAH1|GGT1|C6|SIRPA|GIPC2|FLNB|GNG2|NAGLU|B4GAT1|RHOC|RPS3A|ARSL|DPYSL2|MVP|MSN|GSN|PPIB|RAB17|FAT1|S100A16|CKAP4|PGAM1|ECH1|LY75|PPP1CA|ATP8A1|HSPB1|IMPDH2|NIBAN2|CD63|CTDSP1|FGR|RPS3|ACTB|SERPINB8|ATP1B1|YWHAB|C1GALT1C1|MYL12A|FAT4|YWHAH|TPM4|BCAM|INSR|MYL6|TLN1|LGALS1|CHST14|SGSH|RPS16|MXRA5|PFN1|PGLS|ANXA3|MVB12A|PPP2R1A|LSR|HSP90AB3P|ACSL4|PLSCR1|FBP1|HNRNPA1|…	279	4.35152e-16
cell junction (GO:0030054)	cellular_component	P1	CAPN1|CDH1|KIRREL1|EPHB2|HAPLN1|ARHGAP22|FLNB|CLTB|IRF2|RPS3A|TNN|MSN|GSN|PPIB|FAT1|NPTXR|DLL1|ABHD6|PPP1CA|HSPB1|EFNA2|BMPR2|FZD2|NIBAN2|SEMA4C|RPS3|ACTB|BCAR3|ATP1B1|DCLK1|YWHAB|NFIA|CDH19|YWHAH|TPM4|AJUBA|SLC4A2|PLCB3|TLN1|ACHE|DSTYK|RPS16|PFN1|ARRB2|LSR|ZYX|SH3PXD2A|GNB5|APBB1IP|RIMS3|RDX|DAB2|TUBA1A|LIMA1|LIMS2|FZD1|IL1RAPL2|RPS13|NEDD9|VDAC1|AMOTL2|TMUB1|NTNG1|HIP1|RPL12|LAMA2|RPS4X|MDGA1|G…	262	6.60807e-16
extracellular region (GO:0005576)	cellular_component	P1	EEF1A1P5|FAM20C|SEMA6A|CAPN1|CDH1|EPHB2|WNT6|HAPLN1|DDAH1|GGT1|C6|BLOC1S1|SIRPA|HTRA3|GIPC2|FLNB|CASP4|WFIKKN2|CNPY4|GNG2|ZBED3|NAGLU|APOC1|MMP23B|KDSR|B4GAT1|MMP2|RHOC|RPS3A|FGFBP3|ARSL|CCBE1|DPYSL2|MOV10|TNN|MVP|MSN|CCDC3|GSN|PPIB|EXTL2|ADAMTS5|COL5A2|RAB17|COL4A1|FAT1|S100A16|DLL1|RPL39|MR1|CKAP4|PGAM1|PLA2G7|ECH1|LY75|ZSWIM5|IGFBP4|PRRG3|PPP1CA|CBLIF|ATP8A1|HSPB1|IMPDH2|BMPR2|NIBAN2|SEMA4C|CD…	465	4.02464e-14
extracellular space (GO:0005615)	cellular_component	P1	EEF1A1P5|FAM20C|SEMA6A|CAPN1|CDH1|WNT6|DDAH1|GGT1|C6|BLOC1S1|SIRPA|GIPC2|FLNB|WFIKKN2|GNG2|ZBED3|NAGLU|APOC1|MMP23B|KDSR|B4GAT1|MMP2|RHOC|RPS3A|ARSL|CCBE1|DPYSL2|MOV10|TNN|MVP|MSN|GSN|PPIB|ADAMTS5|COL5A2|RAB17|COL4A1|FAT1|S100A16|RPL39|MR1|CKAP4|PGAM1|PLA2G7|ECH1|LY75|ZSWIM5|IGFBP4|PPP1CA|CBLIF|ATP8A1|HSPB1|IMPDH2|BMPR2|NIBAN2|SEMA4C|CD63|CTDSP1|FGR|RPS3|ACTB|SERPINB8|ATP1B1|COL27A1|TSKU|YWHAB|C1…	379	1.26685e-12
postsynapse (GO:0098794)	cellular_component	P1	CDH1|EPHB2|CLTB|ABHD6|PPP1CA|BMPR2|SEMA4C|RPS3|ACTB|DCLK1|PLCB3|ARRB2|RPS13|TMUB1|HIP1|RPL12|LAMA2|SH3GL1|OPHN1|ZC4H2|LRRC4C|PRKAR2B|NLGN2|ITGA8|CAMK2N1|GLRB|APC2|C1QA|RPL8|ERBB4|LRFN3|PRNP|GRIK3|C1QC|LRFN5|PPP3CA|NEFH|RPL6|GIPC1|RPS14|TANC1|FYN|CDK5|CHRNB1|ADORA1|MEF2C|GRIA3|PALM|RGS9|RPL23|ZDHHC15|EPHA7|F2R|TANC2|DMD|DAG1|NCK2|LRFN1|RPL14|P2RX7|NSG1|CLSTN3|NLGN4Y|LRP1|SYT11|CLSTN1|SNTA1|SYNPO|R…	71	0.0060206
complex of collagen trimers (GO:0098644)	cellular_component	P1	COL5A2|COL4A1|COL27A1|COL1A1|COL3A1|COL5A1|COL4A2|COL1A2	8	0.00384284
small ribosomal subunit (GO:0015935)	cellular_component	P1	RPS4Y1|RPS3A|RPS3|RPS16|RPS28|RPS13|RPS4X|RPS5|RPS14|RPS24|RPS15|MRPS26|RPS8|RPS2|ISG15|RPS27|RPS29	17	0.00121337
chylomicron (GO:0042627)	cellular_component	P1	APOC1|LSR|APOA1|APOE|APOB	5	0.0487925
polysome (GO:0005844)	cellular_component	P1	RPS4Y1|RPL39|RPS3|RPS28|LARP6|RPS4X|RPL18A|RPL36|RPL8|RPL11|RPL10A|RPL6|MSI2|RPL18|RPL41|VIM|RPS29	17	0.000612036
glutamatergic synapse (GO:0098978)	cellular_component	P1	CDH1|EPHB2|ARHGAP22|NPTXR|ABHD6|PPP1CA|ACTB|IL1RAPL2|NTNG1|HIP1|SH3GL1|OPHN1|LRRC4C|PRKAR2B|SYT1|ERBB4|LRFN3|GRIK3|APOE|LRFN5|PPP3CA|GIPC1|FYN|CDK5|TSPOAP1|NTNG2|RGS9|PTPRD|EPHA7|SPARC|DAG1|NSG1|CLSTN3|ADGRL3|NLGN4Y|CLSTN1|CDH11|RPS27|PRKAR1B|ATP2B4|RAC1	41	0.0126369
lamellipodium membrane (GO:0031258)	cellular_component	P1	PLEK2|ITGAV|EPHA2|APC2|ANTXR1|PDPN|PDXP|SYNE2	8	0.00505794
Schaffer collateral - CA1 synapse (GO:0098685)	cellular_component	P1	NTNG1|SH3GL1|LRRC4C|PPP3CA|NEFH|GIPC1|FYN|CDK5|NTNG2|PTPRD|EPHA7|SYT11|CDH11|PRKAR1B	14	0.0128043
cytosolic ribosome (GO:0022626)	cellular_component	P1	RPS4Y1|RPS3A|RPL39|RPS3|RPL29|RPS16|RPL35|RPS28|RPS13|RPL12|RPS4X|RPL18A|RPLP2|RPL36|RPS5|RPL8|RPL11|RPL10A|RPL6|RPS14|RPS24|RPS15|RPL23|RPL34|RPL28|RPL27A|RPL5|RPL9|RPS8|RPL14|RPL18|RPL41|RPLP1|RPS2|RPL27|ISG15|RPS27|RPS29	38	4.02464e-14
cytosolic large ribosomal subunit (GO:0022625)	cellular_component	P1	RPL39|RPL29|RPL35|RPL12|RPL18A|RPLP2|RPL36|RPL8|RPL11|RPL10A|RPL6|RPL23|RPL34|RPL28|RPL27A|RPL5|RPL9|RPL14|RPL18|RPL41|RPLP1|RPL27	22	9.99707e-09
ribosomal subunit (GO:0044391)	cellular_component	P1	RPS4Y1|RPS3A|RPL39|RPS3|RPL29|RPS16|RPL35|RPS28|RPS13|RPL12|RPS4X|RPL18A|RPLP2|RPL36|RPS5|RPL8|RPL11|RPL10A|RPL6|MRPL16|RPS14|MRPL15|RPS24|RPS15|MRPS26|RPL23|RPL34|RPL28|RPL27A|MRPL23|RPL5|RPL9|RPS8|RPL14|RPL18|RPL41|RPLP1|RPS2|RPL27|ISG15|RPS27|RPS29	42	1.70989e-08
ribosome (GO:0005840)	cellular_component	P1	RPS4Y1|RPS3A|RPL39|RPS3|RPL29|RPS16|RPL35|RPS28|RPS13|RPL12|RPS4X|RPL18A|RPLP2|RPL36|RPS5|RPL8|RPL11|RPL10A|GADD45GIP1|EIF2AK2|RPL6|MRPL16|RPS14|MRPL15|RPS24|RPS15|APEX1|MRPS26|RPL23|RPL34|RPL28|RPL27A|MRPL23|RPL5|RPL9|RPS8|RPL14|RPL18|RPL41|RPLP1|RPS2|RPL27|ISG15|RPS27|RPS29	45	3.34984e-07
cytosolic small ribosomal subunit (GO:0022627)	cellular_component	P1	RPS4Y1|RPS3A|RPS3|RPS16|RPS28|RPS13|RPS4X|RPS5|RPS14|RPS24|RPS15|RPS8|RPS2|ISG15|RPS27|RPS29	16	9.02918e-06
endoplasmic reticulum lumen (GO:0005788)	cellular_component	P1	FAM20C|WNT6|COLGALT2|ARSL|PPIB|ADAMTS5|COL5A2|COL4A1|CKAP4|IGFBP4|COL27A1|COL1A1|IL12B|COLGALT1|LGALS1|COL3A1|SERPINH1|PLOD3|APOA1|P3H2|NUCB1|POGLUT3|ARSK|ADAMTS7|COL5A1|APOE|EDEM2|TSPAN5|TOR3A|FLT3|ANO8|TMEM132A|SHISA5|ARSD|COL4A2|VCAN|VWA1|GAS6|PDGFA|COL18A1|MBTPS1|B2M|APOB|LAMB2|GPX8|POGLUT2|DAG1|HRC|COL1A2|COL15A1|PDIA4	51	9.05242e-06
synapse (GO:0045202)	cellular_component	P1	CDH1|EPHB2|HAPLN1|ARHGAP22|CLTB|TNN|NPTXR|ABHD6|PPP1CA|EFNA2|BMPR2|SEMA4C|RPS3|ACTB|DCLK1|PLCB3|ACHE|ARRB2|GNB5|RIMS3|TUBA1A|IL1RAPL2|RPS13|VDAC1|TMUB1|NTNG1|HIP1|RPL12|LAMA2|RPS4X|MDGA1|KIRREL3|SH3KBP1|SNTB1|SH3GL1|OPHN1|ZC4H2|TMEM240|LRRC4C|PRKAR2B|NLGN2|KCNC4|ITGA8|CAMK2N1|GLRB|APC2|SYT1|DPYSL3|C1QA|RPL8|ERBB4|LRFN3|SYNJ2|PRNP|KCNK3|GRIK3|APOE|POSTN|OLFM2|C1QC|LRFN5|SCGN|PPP3CA|PLD2|FAM107A|NE…	145	6.10075e-05
large ribosomal subunit (GO:0015934)	cellular_component	P1	RPL39|RPL29|RPL35|RPL12|RPL18A|RPLP2|RPL36|RPL8|RPL11|RPL10A|RPL6|MRPL16|MRPL15|RPL23|RPL34|RPL28|RPL27A|MRPL23|RPL5|RPL9|RPL14|RPL18|RPL41|RPLP1|RPL27	25	9.87082e-05
polysomal ribosome (GO:0042788)	cellular_component	P1	RPL39|RPS28|RPL18A|RPL36|RPL8|RPL11|RPL10A|RPL6|RPL18|RPL41|RPS29	11	0.000780015
pore complex (GO:0046930)	cellular_component	P1	C6|PPIF|TOMM40|VDAC1|TOMM40L|BCL2|C7|PDZD11|BAX	9	0.00130195
insulin receptor complex (GO:0005899)	cellular_component	P1	IRS1|INSRR|IGF1R|INSR	4	0.00150571
banded collagen fibril (GO:0098643)	cellular_component	P1	COL5A2|COL27A1|COL1A1|COL3A1|COL5A1|COL1A2	6	0.00462035
fibrillar collagen trimer (GO:0005583)	cellular_component	P1	COL5A2|COL27A1|COL1A1|COL3A1|COL5A1|COL1A2	6	0.00462035
low-density lipoprotein particle (GO:0034362)	cellular_component	P1	PLA2G7|LSR|APOA1|APOE|LDLR|APOB	6	0.00724269
dystrophin-associated glycoprotein complex (GO:0016010)	cellular_component	P1	SNTB1|SGCE|PGM5|DMD|DAG1|KRT8|SNTA1	7	0.0109579
glycoprotein complex (GO:0090665)	cellular_component	P1	SNTB1|SGCE|PGM5|DMD|DAG1|KRT8|SNTA1	7	0.0109579
receptor complex (GO:0043235)	cellular_component	P1	EPHB2|AMHR2|IRS1|INSRR|ABHD6|BMPR2|IGF1R|IL12B|ADRB3|INSR|LRP5|APBB1IP|IL10RB|CSF1R|SMAD3|NPR1|ITGAV|BMP2|ITGB5|CNTFR|ITGA8|EPHA2|ERBB3|ERBB4|BMPR1A|TM7SF2|HSPD1|GRIK3|OLFM2|NOTCH2|ERBB2|PLXNA1|DDR1|ITGA2|CHRNB1|FLT3|LDLR|ITGA6|GRIA3|AXL|IL6R|TGFBR2|AIP|LOXL4|EPHA7|ITGA3|DDR2|B2M|EMILIN1|EPHB3|IL11RA|SYK|GPRC5B|CD14|CALCRL|LRP1|TLR4|PLXNC1|VLDLR	59	0.0304418
laminin complex (GO:0043256)	cellular_component	P1	NTNG1|NTNG2|LAMB2|NTN4|LAMA3	5	0.0358544
membrane microdomain (GO:0098857)	cellular_component	P1	CDH1|KIRREL1|IRS1|DLL1|BMPR2|ATP1B1|PLLP|KCNQ1|INSR|ABCG2|PLSCR1|ABCA1|TUBA1A|SERPINH1|EMP2|VDAC1|TDGF1|PRKAR2B|BMPR1A|SYNJ2|PRNP|EDNRB|PDPN|GPC1|FYN|MAG|TGFBR2|F2R|EFNB1|FLOT2|S100A10|CLIP3|DMD|CTNNA1|DAG1|CD14|CR1|ADGRG1|IQGAP1|ATP2B4	40	0.0422939
membrane raft (GO:0045121)	cellular_component	P1	CDH1|KIRREL1|IRS1|DLL1|BMPR2|ATP1B1|PLLP|KCNQ1|INSR|ABCG2|PLSCR1|ABCA1|TUBA1A|SERPINH1|EMP2|VDAC1|TDGF1|PRKAR2B|BMPR1A|SYNJ2|PRNP|EDNRB|PDPN|GPC1|FYN|MAG|TGFBR2|F2R|EFNB1|FLOT2|S100A10|CLIP3|DMD|CTNNA1|DAG1|CD14|CR1|ADGRG1|IQGAP1|ATP2B4	40	0.0422939
I-kappaB/NF-kappaB complex (GO:0033256)	cellular_component	P1	BCL3|NFKB2|NFKBIA	3	0.0422939
mitochondrial permeability transition pore complex (GO:0005757)	cellular_component	P1	PPIF|VDAC1|BAX	3	0.0422939
neuromuscular junction (GO:0031594)	cellular_component	P1	EFNA2|ACHE|TUBA1A|LAMA2|POSTN|CDK5|CHRNB1|EPHA7|F2R|LAMB2|MYH9|PDZRN3|SNTA1	13	0.0457012
heteromeric SMAD protein complex (GO:0071144)	cellular_component	P1	SMAD5|SMAD3|SMAD7|SMAD6	4	0.0457511
collagen-containing extracellular matrix (GO:0062023)	cellular_component	P1	HAPLN1|MMP23B|MMP2|FGFBP3|TNN|ADAMTS5|COL5A2|COL4A1|MATN2|SERPINB8|COL27A1|COL1A1|BCAM|LGALS1|ACHE|MXRA5|PLSCR1|COL3A1|FBN3|SCARA3|SERPINH1|PLOD3|APOA1|ELANE|PCSK6|P3H2|NTNG1|LAMA2|SERPINF1|TINAGL1|ADAMTS9|NDP|C1QA|COL5A1|APOE|POSTN|LOXL2|C1QC|ANG|SERPINB1|SMOC1|GPC1|COL4A2|VCAN|NID1|VWA1|NTNG2|EMILIN3|COL18A1|ANXA6|FGF10|LAMB2|NTN4|SPARC|SEMA7A|LTBP3|EMILIN1|S100A10|DAG1|CXCL12|COL1A2|CASK|LAMA3…	68	3.90911e-07
extracellular matrix (GO:0031012)	cellular_component	P1	WNT6|HAPLN1|MMP23B|MMP2|FGFBP3|CCBE1|TNN|ADAMTS5|COL5A2|COL4A1|MATN2|SERPINB8|COL27A1|COL1A1|BCAM|LGALS1|ACHE|MXRA5|PLSCR1|COL3A1|FBN3|SCARA3|SERPINH1|SPOCK2|PLOD3|APOA1|ELANE|PCSK6|P3H2|NTNG1|LAMA2|COLEC12|SERPINF1|MMP15|TINAGL1|ANOS1|ADAMTS9|NDP|ADAMTS7|GP1BA|C1QA|COL5A1|APOE|POSTN|LOXL2|C1QC|ANG|SERPINB1|SMOC1|GPC1|VEGFA|COL4A2|VCAN|MMP14|NID1|VWA1|NTNG2|EMILIN3|COL18A1|CHI3L1|ANXA6|FLRT1|FGF1…	81	1.86455e-06
external encapsulating structure (GO:0030312)	cellular_component	P1	WNT6|HAPLN1|MMP23B|MMP2|FGFBP3|CCBE1|TNN|ADAMTS5|COL5A2|COL4A1|MATN2|SERPINB8|COL27A1|COL1A1|BCAM|LGALS1|ACHE|MXRA5|PLSCR1|COL3A1|FBN3|SCARA3|SERPINH1|SPOCK2|PLOD3|APOA1|ELANE|PCSK6|P3H2|NTNG1|LAMA2|COLEC12|SERPINF1|MMP15|TINAGL1|ANOS1|ADAMTS9|NDP|ADAMTS7|GP1BA|C1QA|COL5A1|APOE|POSTN|LOXL2|C1QC|ANG|SERPINB1|SMOC1|GPC1|VEGFA|COL4A2|VCAN|MMP14|NID1|VWA1|NTNG2|EMILIN3|COL18A1|CHI3L1|ANXA6|FLRT1|FGF1…	81	1.93003e-06
basement membrane (GO:0005604)	cellular_component	P1	COL4A1|ACHE|P3H2|NTNG1|LAMA2|SERPINF1|COL5A1|LOXL2|ANG|SMOC1|COL4A2|NID1|VWA1|NTNG2|COL18A1|LAMB2|NTN4|SPARC|DAG1|CASK|LAMA3|NID2|COL15A1	23	3.68736e-05
basolateral plasma membrane (GO:0016323)	cellular_component	P1	MSN|RAB17|SLC22A9|ATP1B1|KCNQ1|SLC4A2|DSTYK|ARRB2|SLC41A1|AQP3|ERBB3|CD38|ERBB4|ABCA8|PDPN|ERBB2|ADORA1|LDLR|SLC29A4|CA11|PALM|DSP|SLC38A1|HEPH|AQP4|ITGA3|SLC29A2|FLOT2|OTOF|SLC39A14|PDZD11|LRP1|SLC26A7|CLDN1|CTNNB1|ATP2B4	36	0.00020221
basal plasma membrane (GO:0009925)	cellular_component	P1	MSN|RAB17|BMPR2|SLC22A9|ATP1B1|KCNQ1|SLC4A2|DSTYK|ARRB2|SLC41A1|AQP3|ERBB3|CD38|ERBB4|ABCA8|PDPN|TACSTD2|ERBB2|ADORA1|LDLR|SLC29A4|CA11|PALM|DSP|SLC38A1|HEPH|AQP4|ITGA3|SLC29A2|FLOT2|OTOF|SLC39A14|PDZD11|LRP1|SLC26A7|CLDN1|CTNNB1|ATP2B4	38	0.000636138
basal part of cell (GO:0045178)	cellular_component	P1	MSN|RAB17|BMPR2|SLC22A9|ATP1B1|KCNQ1|SLC4A2|DSTYK|ARRB2|SLC41A1|AQP3|ERBB3|CD38|ERBB4|ABCA8|PDPN|TACSTD2|ERBB2|ITGA2|ADORA1|LDLR|SLC29A4|CA11|PALM|DSP|SLC38A1|HEPH|AQP4|ITGA3|SLC29A2|FLOT2|OTOF|SLC39A14|PDZD11|LRP1|SLC26A7|CLDN1|CTNNB1|ATP2B4	39	0.00130195
collagen trimer (GO:0005581)	cellular_component	P1	CCBE1|COL5A2|COL4A1|COL27A1|COL1A1|COL3A1|SCARA3|COLEC12|C1QA|COL5A1|C1QC|COL4A2|COL18A1|EMID1|EMILIN1|COL1A2|COL15A1|C1QTNF1	18	0.0038059
endocytic vesicle (GO:0030139)	cellular_component	P1	WNT6|CLTB|GSN|RAB17|FZD2|ARRB2|RAB20|ANXA3|ZYX|ABCA1|APOA1|ELANE|COLEC12|ITGAV|SH3KBP1|ITGB5|CDC42EP4|MTSS1|RAC2|APOE|GIPC1|LDLR|CD9|STAB1|NOSTRIN|GRIA3|CAMK2B|B2M|APOB|FLOT2|SPARC|APPL1|SYK|RIN3|RAB35|LRP1|SYT11|CYBB|VIM	39	0.0273899
protein complex involved in cell adhesion (GO:0098636)	cellular_component	P1	CD28|ITGAV|ITGB5|ITGA8|ITGA2|ITGA6|ITGA3|JAM2|EMILIN1	9	0.0355531
adherens junction (GO:0005912)	cellular_component	P1	CDH1|DLL1|PPP1CA|BMPR2|NIBAN2|ACTB|CDH19|AJUBA|TLN1|ZYX|RDX|CDC42EP4|PDLIM3|CCDC85B|ARHGAP24|FRMD4A|SMAD7|CAMSAP3|ITGA6|VEGFA|AJM1|VCL|FRMD4B|FLOT2|OXTR|MYH9|PGM5|JAG1|CTNNA1|DAG1|PDZD11|KLHL24|CDH3|LIMD1|CDH11|CTNNB1|JCAD	37	7.99927e-07
ruffle (GO:0001726)	cellular_component	P1	GSN|FGR|RPS3|TLN1|LIMA1|ITGAV|CDK6|EPHA2|MTSS1|PDPN|FAM107A|FSCN1|FERMT1|EEF1A1|PDXP|FRMD4B|RINL|PSD4|APPL1|MYH9|AIF1L|WWC1|IQGAP1|TLR4|RAC1|JCAD	26	0.0213353
filopodium membrane (GO:0031527)	cellular_component	P1	ITGAV|ANTXR1|PDPN|PALM|SYNE2|ITGA3|DMD	7	0.00764946
costamere (GO:0043034)	cellular_component	P1	SVIL|VCL|PGM5|DMD|DAG1|KRT8	6	0.0422939
cell-cell junction (GO:0005911)	cellular_component	P1	CDH1|KIRREL1|FAT1|DLL1|PPP1CA|BMPR2|NIBAN2|ACTB|ATP1B1|CDH19|YWHAH|AJUBA|TLN1|LSR|ZYX|RDX|LIMS2|AMOTL2|KIRREL3|SH3KBP1|CDC42EP4|AQP3|PDLIM3|PANX1|EPHA2|CCDC85B|ARHGAP24|FRMD4A|PIK3R1|F11R|SMAD7|PPP3CA|CGNL1|CAMSAP3|OBSL1|ITGA6|VEGFA|FSCN1|AJM1|VCL|PDXP|CDK4|CADM4|FRMD4B|DSP|FLRT1|JAM2|FLOT2|OXTR|MYH9|PGM5|JAG1|CTNNA1|DAG1|KRT8|VSIG10|PDZD11|HEG1|KLHL24|CASK|CDH3|LIMD1|ADGRL3|IQGAP1|CLDN1|CDH11|SY…	69	2.69519e-05
cell leading edge (GO:0031252)	cellular_component	P1	CDH1|GSN|PLEK2|FGR|RPS3|ACTB|AJUBA|INSR|TLN1|APBB1IP|RDX|LIMA1|NEDD9|TWF2|ITGAV|KCNC4|ITGA8|CDK6|EPHA2|APC2|DPYSL3|MTSS1|ANTXR1|RAC2|PDPN|FAM107A|SGCE|PLEKHH2|RAPGEF3|CDK5|PLCE1|ADORA1|FSCN1|FERMT1|EEF1A1|PDXP|PALM|CADM4|SYNE2|FRMD4B|SH3RF1|RINL|CXCR4|SLK|MCC|PSD4|FLOT2|APPL1|MYH9|CTNNA1|DAG1|AIF1L|WWC1|IQGAP1|TLR4|VIM|RAC1|JCAD	58	0.000239638
actin cytoskeleton (GO:0015629)	cellular_component	P1	CDH1|BMF|FLNB|H1-0|GSN|FGR|ACTB|MYL12A|TPM4|MYL6|ZYX|SH3PXD2A|RDX|LIMA1|LIMCH1|TWF2|TNNI3|SH3GL1|OPHN1|PKNOX2|CDC42EP4|PDLIM3|APC2|DPYSL3|MTSS1|RAC2|MYL7|ANG|STK38L|FAM107A|CGNL1|ACTR1B|PLEKHH2|RAPGEF3|FYN|CORO2B|FSCN1|SVIL|VCL|EEF1A1|PDXP|ZNF74|AXL|RTKN|RINL|SNCA|WIPF3|ALDOA|DDR2|ABLIM2|FHOD3|FLOT2|MYH9|ACTN4|PGM5|CTNNA1|CROCC|CASK|AIF1L|LASP1|IQGAP1|SYNPO|RAC1	63	0.00193909
lamellipodium (GO:0030027)	cellular_component	P1	CDH1|GSN|PLEK2|ACTB|AJUBA|APBB1IP|RDX|NEDD9|TWF2|ITGAV|EPHA2|APC2|DPYSL3|ANTXR1|RAC2|PDPN|PLEKHH2|RAPGEF3|CDK5|PLCE1|FSCN1|PDXP|SYNE2|SH3RF1|MCC|FLOT2|CTNNA1|DAG1|RAC1	29	0.0126369
leading edge membrane (GO:0031256)	cellular_component	P1	PLEK2|FGR|RPS3|INSR|TLN1|ITGAV|KCNC4|ITGA8|EPHA2|APC2|ANTXR1|PDPN|FAM107A|SGCE|ADORA1|FERMT1|EEF1A1|PDXP|PALM|SYNE2|PSD4|AIF1L|WWC1|RAC1|JCAD	25	0.0393032
vesicle (GO:0031982)	cellular_component	P1	EEF1A1P5|FAM20C|CAPN1|CDH1|BMF|CCDC22|WNT6|DDAH1|GGT1|C6|SIRPA|GIPC2|FLNB|CLTB|GNG2|NAGLU|TRIM21|B4GAT1|RHOC|RPS3A|ARSL|PMEPA1|DPYSL2|MVP|MSN|GSN|PPIB|RAB17|FAT1|S100A16|UBQLN2|DLL1|MR1|CKAP4|PGAM1|ECH1|LY75|ABHD6|CDKN1B|PPP1CA|CBLIF|ATP8A1|HSPB1|IMPDH2|FZD2|NIBAN2|SEMA4C|CD63|CTDSP1|FGR|MAGED2|RPS3|ACTB|SERPINB8|ATP1B1|YWHAB|C1GALT1C1|COL1A1|MYL12A|FAT4|YWHAH|KCNQ1|SNX21|TPM4|IL12B|BCAM|INSR|MYL…	416	3.89266e-11
membrane (GO:0016020)	cellular_component	P1	ADGRD2|SEMA6A|CAPN1|ILDR2|CDH1|BMF|KIRREL1|ZNF219|EPHB2|WNT6|ATP5MC2|MARCHF9|GGT1|OSBPL7|C6|BLOC1S1|SIRPA|TVP23A|FLNB|CASP4|CCR1|ST6GALNAC1|CLTB|MTMR8|GNG2|ZBED3|IFITM2|KLRK1|WWTR1|MMP23B|KDSR|RPS4Y1|KCNJ5|RGS4|UBL4A|SLC43A3|AMHR2|B4GAT1|MMP2|RHOC|IFI6|ATP10D|SLC22A17|QTRT1|PMEPA1|DPYSL2|PCDHGA6|MVP|CREB3L4|MSN|GSN|GSDME|RNF150|PPIB|CHPF|EXTL2|RAB17|FAT1|NPTXR|PLEK2|S100A16|PTPN5|IRS1|GNRHR|GALNT…	842	1.23919e-09
cell periphery (GO:0071944)	cellular_component	P1	ADGRD2|SEMA6A|CAPN1|CDH1|BMF|KIRREL1|EPHB2|WNT6|HAPLN1|GGT1|OSBPL7|C6|SIRPA|FLNB|CASP4|CCR1|CLTB|GNG2|IFITM2|KLRK1|WWTR1|MMP23B|KCNJ5|RGS4|AMHR2|MMP2|RHOC|IFI6|FGFBP3|ATP10D|SLC22A17|CCBE1|PMEPA1|DPYSL2|PCDHGA6|TNN|MSN|GSN|GSDME|ADAMTS5|COL5A2|RAB17|COL4A1|FAT1|PLEK2|S100A16|IRS1|GNRHR|MATN2|UBQLN2|DLL1|MR1|CKAP4|CD200|NINJ2|SCN9A|INSRR|ROBO1|LY75|ZNRF3|ABHD6|FRMPD1|PPP1CA|CBLIF|ATP8A1|EFNA2|BMPR…	581	2.43805e-09
plasma membrane (GO:0005886)	cellular_component	P1	ADGRD2|SEMA6A|CAPN1|CDH1|BMF|KIRREL1|EPHB2|WNT6|GGT1|OSBPL7|C6|SIRPA|FLNB|CASP4|CCR1|CLTB|GNG2|IFITM2|KLRK1|WWTR1|KCNJ5|RGS4|AMHR2|MMP2|RHOC|IFI6|ATP10D|SLC22A17|PMEPA1|DPYSL2|PCDHGA6|MSN|GSN|GSDME|RAB17|FAT1|PLEK2|S100A16|IRS1|GNRHR|UBQLN2|DLL1|MR1|CKAP4|CD200|NINJ2|SCN9A|INSRR|ROBO1|LY75|ZNRF3|ABHD6|FRMPD1|PPP1CA|CBLIF|ATP8A1|EFNA2|BMPR2|FZD2|IGDCC4|IGF1R|NIBAN2|SEMA4C|CD63|OPN3|SLC22A9|PTPRZ1|…	517	8.34196e-06
cytoplasm (GO:0005737)	cellular_component	P1	NDN|EEF1A1P5|LSM7|FAM20C|CAPN1|ILDR2|CDH1|BMF|CCDC22|KIRREL1|EPHB2|WNT6|ATP5MC2|DDAH1|ARHGAP22|MARCHF9|OSBPL7|PKIA|BLOC1S1|SIRPA|GIPC2|TVP23A|FLNB|CASP4|CCR1|LCA5|ST6GALNAC1|ATF7|CLTB|PLCL2|MTMR8|GNG2|ZBED3|SAMD9|H1-0|NAGLU|SOX4|WWTR1|APOC1|MMP23B|KDSR|RPS4Y1|RGS4|UBL4A|ZFHX3|TRIM21|PTPN14|COLGALT2|B4GAT1|MMP2|RHOC|IRF2|RPS3A|IFI6|SULT1C4|ARSL|ATP10D|SLC22A17|QTRT1|PMEPA1|DPYSL2|PAPSS1|MOV10|MVP|…	1011	4.09366e-09
intrinsic component of plasma membrane (GO:0031226)	cellular_component	P1	ADGRD2|SEMA6A|KIRREL1|EPHB2|C6|SIRPA|CCR1|KLRK1|KCNJ5|AMHR2|ATP10D|SLC22A17|PCDHGA6|FAT1|IRS1|GNRHR|DLL1|CD200|NINJ2|SCN9A|INSRR|ROBO1|LY75|ZNRF3|ABHD6|BMPR2|IGF1R|SEMA4C|CD63|OPN3|PTPRZ1|TRPC3|PCDHGC3|LRRC38|SLC25A4|ATP1B1|DCLK1|HAS3|KCNQ1|TSPAN7|BCAM|ADRB3|INSR|PCDHGB6|TRO|CD28|SLC38A2|REEP2|PLSCR1|ABCA1|IL10RB|SEMA6B|NRCAM|CSF1R|RNF43|SLC4A3|KCNF1|NTNG1|PTPRH|MDGA1|KIRREL3|ITGAV|NPY2R|BMP2|ITG…	195	7.22407e-07
integral component of plasma membrane (GO:0005887)	cellular_component	P1	ADGRD2|SEMA6A|KIRREL1|EPHB2|C6|SIRPA|CCR1|KLRK1|KCNJ5|AMHR2|ATP10D|SLC22A17|PCDHGA6|FAT1|IRS1|GNRHR|DLL1|CD200|NINJ2|SCN9A|INSRR|ROBO1|LY75|ZNRF3|ABHD6|BMPR2|IGF1R|SEMA4C|CD63|OPN3|PTPRZ1|TRPC3|PCDHGC3|LRRC38|SLC25A4|ATP1B1|DCLK1|HAS3|KCNQ1|TSPAN7|BCAM|ADRB3|INSR|PCDHGB6|CD28|SLC38A2|REEP2|PLSCR1|ABCA1|IL10RB|SEMA6B|NRCAM|CSF1R|RNF43|SLC4A3|KCNF1|PTPRH|KIRREL3|ITGAV|NPY2R|BMP2|ITGB5|CNTFR|MMP15|P…	185	2.58015e-06
endomembrane system (GO:0012505)	cellular_component	P1	FAM20C|CAPN1|ILDR2|CDH1|BMF|CCDC22|WNT6|MARCHF9|OSBPL7|SIRPA|TVP23A|CASP4|ST6GALNAC1|CLTB|MTMR8|H1-0|APOC1|MMP23B|KDSR|COLGALT2|B4GAT1|RPS3A|ARSL|ATP10D|PMEPA1|MVP|CREB3L4|CCDC3|GSN|PPIB|CHPF|EXTL2|ADAMTS5|COL5A2|RAB17|COL4A1|PTPN5|GALNT18|FKBP9|CYP2A6|MR1|CKAP4|PGAM1|IGFBP4|ABHD6|CDKN1B|GALNT16|TMEM176B|SCD|CBLIF|ATP8A1|IMPDH2|DGAT2L6|SEMA4C|CD63|FGR|MAGED2|APOL2|RPS3|COL27A1|C1GALT1C1|COL1A1|KC…	431	3.08289e-05
plasma membrane region (GO:0098590)	cellular_component	P1	CDH1|KIRREL1|EPHB2|CLTB|RHOC|MSN|RAB17|PLEK2|IRS1|DLL1|ABHD6|CBLIF|BMPR2|SEMA4C|SLC22A9|FGR|RPS3|ATP1B1|KCNQ1|LRP10|SLC4A2|INSR|TLN1|DSTYK|ABCG2|ARRB2|SLC41A1|RIMS3|RDX|DAB2|LIMA1|EMP2|TMUB1|NTNG1|HIP1|PTPRH|TDGF1|ITGAV|CNTFR|ZC4H2|TMEM240|AQP3|LRRC4C|NLGN2|KCNC4|ITGA8|EPHA2|SH3BP4|ERBB3|GLRB|APC2|CD38|SYT1|ERBB4|ANTXR1|BMPR1A|LRFN3|DHRS3|HSPD1|ENPEP|GRIK3|ABCA8|PDPN|LRFN5|GPR157|SLC26A9|TACSTD2|…	138	6.45577e-05
endoplasmic reticulum (GO:0005783)	cellular_component	P1	FAM20C|ILDR2|WNT6|OSBPL7|CASP4|APOC1|MMP23B|KDSR|COLGALT2|RPS3A|ARSL|ATP10D|CREB3L4|CCDC3|PPIB|EXTL2|ADAMTS5|COL5A2|COL4A1|PTPN5|FKBP9|CYP2A6|MR1|CKAP4|IGFBP4|SCD|ATP8A1|DGAT2L6|APOL2|RPS3|COL27A1|COL1A1|KCNQ1|IL12B|COLGALT1|LGALS1|ESYT1|ANP32A|REEP2|ACSL4|PCYT1B|ABCA1|LRP5|PRKCA|COL3A1|HSD17B3|SCARA3|SERPINH1|RAB6A|RNF43|OAS1|PLOD3|APOA1|RPS28|PCSK6|GHDC|SLC39A1|P3H2|RHBDF1|CTSA|NUCB1|POGLUT3|C1…	204	0.000126327
bounding membrane of organelle (GO:0098588)	cellular_component	P1	BMF|WNT6|ATP5MC2|MARCHF9|BLOC1S1|SIRPA|TVP23A|ST6GALNAC1|CLTB|B4GAT1|SLC22A17|QTRT1|PMEPA1|CREB3L4|CHPF|RAB17|GALNT18|MR1|CKAP4|ROBO1|ABHD6|GALNT16|ATP8A1|IMPDH2|FZD2|SEMA4C|CD63|YWHAB|C1GALT1C1|SNX21|NDST4|INSR|TFEB|CHST14|RAB20|ANXA3|MVB12A|ST8SIA5|ACSL4|ST3GAL2|DAB2|SCARA3|SLC48A1|RAB6A|RAB33B|CHST11|TOMM40|ST6GALNAC4|EMP2|RPS28|TICAM1|VDAC1|RHBDF1|HIP1|CTSA|TOMM40L|NUCB1|COLEC12|ITGAV|GLIPR2|…	218	0.000181967
membrane-bounded organelle (GO:0043227)	cellular_component	P1	SURF6|NDN|EEF1A1P5|LSM7|FAM20C|CAPN1|ILDR2|CDH1|BMF|CCDC22|ZNF219|VGLL4|EPHB2|WNT6|ATP5MC2|DDAH1|PATZ1|ARHGAP22|MARCHF9|GGT1|OSBPL7|C6|ZNF347|PKIA|BLOC1S1|SIRPA|GIPC2|TVP23A|FLNB|CASP4|ST6GALNAC1|ATF7|CLTB|ZNF835|MTMR8|GNG2|SAMD9|H1-0|NAGLU|SOX4|PHF6|WWTR1|APOC1|MMP23B|KDSR|RPS4Y1|RGS4|UBL4A|ZFHX3|TRIM21|PTPN14|COLGALT2|B4GAT1|MMP2|SNORD114-1|RHOC|IRF2|RPS3A|IFI6|NAV2|ARSL|ATP10D|SLC22A17|TCF21|Q…	1069	0.000380138
organelle (GO:0043226)	cellular_component	P1	SURF6|NDN|EEF1A1P5|LSM7|FAM20C|CAPN1|ILDR2|CDH1|BMF|CCDC22|ZNF219|VGLL4|EPHB2|WNT6|ATP5MC2|DDAH1|PATZ1|ARHGAP22|MARCHF9|GGT1|OSBPL7|C6|ZNF347|PKIA|BLOC1S1|SIRPA|GIPC2|TVP23A|FLNB|CASP4|LCA5|ST6GALNAC1|ATF7|CLTB|ZNF835|MTMR8|GNG2|ZBED3|SAMD9|H1-0|NAGLU|SOX4|PHF6|WWTR1|APOC1|MMP23B|KDSR|RPS4Y1|RGS4|UBL4A|ZFHX3|TRIM21|PTPN14|COLGALT2|B4GAT1|MMP2|SNORD114-1|RHOC|IRF2|RPS3A|IFI6|NAV2|ARSL|ATP10D|SLC22…	1146	0.000755183
cell surface (GO:0009986)	cellular_component	P1	WNT6|SIRPA|CCR1|KLRK1|KCNJ5|TNN|MSN|MR1|CD200|ROBO1|LY75|BMPR2|CD63|IL12B|BCAM|CD302|INSR|TLN1|LGALS1|ACHE|ABCG2|CD28|NRCAM|CSF1R|FZD1|EMP2|APOA1|ELANE|PCSK6|SLC4A3|TDGF1|ITGAV|BMP2|ITGB5|CNTFR|NLGN2|ITGA8|WIF1|EPHA2|CD38|ANOS1|NDP|ANO6|GP1BA|ANTXR1|BMPR1A|LRFN3|PRNP|PLA2G1B|HSPD1|ENPEP|LRFN5|NOTCH2|ABCG1|SLITRK6|SLC26A9|GPC1|PROCR|ITGA2|IGSF3|LDLR|ITGA6|CEL|VEGFA|DCBLD2|ENO1|AXL|IL6R|TGFBR2|PTGF…	100	0.000858391
cytosol (GO:0005829)	cellular_component	P1	NDN|LSM7|CAPN1|BMF|CCDC22|EPHB2|DDAH1|ARHGAP22|OSBPL7|BLOC1S1|FLNB|CASP4|CLTB|MTMR8|ZBED3|SAMD9|WWTR1|RPS4Y1|RGS4|UBL4A|TRIM21|RHOC|IRF2|RPS3A|SULT1C4|DPYSL2|PAPSS1|MOV10|MVP|MSN|GSN|GSDME|CHPF|EXTL2|S100A16|THAP11|IRS1|DTX4|UBQLN2|FBXL19|RPL39|CKAP4|PGAM1|ZC3HAV1|ECH1|CDKN1B|FRMPD1|PPP1CA|ARHGEF3|HSPB1|IMPDH2|NIBAN2|GLI2|FGR|UCK2|MAGED2|GMPR|CXXC5|RPS3|ACTB|SERPINB8|TRIM47|YWHAB|MYL12A|YWHAH|MAP…	470	0.00137963
organelle membrane (GO:0031090)	cellular_component	P1	ILDR2|BMF|WNT6|ATP5MC2|MARCHF9|OSBPL7|BLOC1S1|SIRPA|TVP23A|CASP4|ST6GALNAC1|CLTB|MMP23B|KDSR|B4GAT1|IFI6|ATP10D|SLC22A17|QTRT1|PMEPA1|CREB3L4|CHPF|EXTL2|RAB17|PTPN5|GALNT18|CYP2A6|MR1|CKAP4|ROBO1|ABHD6|GALNT16|TMEM176B|SCD|ATP8A1|IMPDH2|FZD2|DGAT2L6|SEMA4C|CD63|FGR|APOL2|RPS3|SLC25A4|ATP1B1|YWHAB|C1GALT1C1|KCNQ1|SNX21|PPIF|NDST4|UQCRHL|INSR|TFEB|ESYT1|CHST14|ABCG2|RAB20|ANXA3|MVB12A|ST8SIA5|REEP2…	331	0.00169621
intrinsic component of membrane (GO:0031224)	cellular_component	P1	ADGRD2|SEMA6A|ILDR2|CDH1|KIRREL1|ZNF219|EPHB2|ATP5MC2|MARCHF9|GGT1|C6|SIRPA|TVP23A|FLNB|CCR1|ST6GALNAC1|IFITM2|KLRK1|MMP23B|KDSR|KCNJ5|SLC43A3|AMHR2|B4GAT1|IFI6|ATP10D|SLC22A17|PMEPA1|PCDHGA6|CREB3L4|GSDME|RNF150|CHPF|EXTL2|FAT1|NPTXR|PTPN5|IRS1|GNRHR|GALNT18|DLL1|MR1|CKAP4|CD200|NINJ2|SCN9A|TMEM221|INSRR|ROBO1|LY75|ZNRF3|ABHD6|GALNT16|TMEM176B|SCD|PRRG3|VSIG4|ATP8A1|EFNA2|BMPR2|FZD2|DGAT2L6|IGDC…	480	0.00183514
integral component of membrane (GO:0016021)	cellular_component	P1	ADGRD2|SEMA6A|ILDR2|CDH1|KIRREL1|ZNF219|EPHB2|ATP5MC2|MARCHF9|GGT1|C6|SIRPA|TVP23A|FLNB|CCR1|ST6GALNAC1|IFITM2|KLRK1|MMP23B|KDSR|KCNJ5|SLC43A3|AMHR2|B4GAT1|IFI6|ATP10D|SLC22A17|PMEPA1|PCDHGA6|CREB3L4|GSDME|RNF150|CHPF|EXTL2|FAT1|NPTXR|PTPN5|IRS1|GNRHR|GALNT18|DLL1|MR1|CKAP4|CD200|NINJ2|SCN9A|TMEM221|INSRR|ROBO1|LY75|ZNRF3|ABHD6|GALNT16|TMEM176B|SCD|PRRG3|VSIG4|ATP8A1|BMPR2|FZD2|DGAT2L6|IGDCC4|IGF…	462	0.00505794
Golgi apparatus subcompartment (GO:0098791)	cellular_component	P1	CDH1|MARCHF9|TVP23A|ST6GALNAC1|CLTB|B4GAT1|ARSL|PMEPA1|CREB3L4|CHPF|GALNT18|MR1|GALNT16|ATP8A1|C1GALT1C1|NDST4|CHST14|ST8SIA5|ST3GAL2|SCARA3|RAB6A|RAB33B|CHST11|ST6GALNAC4|EMP2|PLOD3|RHBDF1|NUCB1|GLIPR2|MANEAL|ERGIC1|B3GALT6|CHST3|GALNT1|PYCARD|HS2ST1|HID1|POSTN|NOTCH2|SLC35B2|ABCG1|B3GNT3|BACE2|MGAT5|LFNG|TPST2|NDFIP1|HS6ST1|PLD3|PLCE1|SREBF2|TMEM132A|GAL3ST4|GRN|PRKD1|TMEM115|MBTPS2|GALNT17|FUT…	99	0.00327623
Golgi apparatus (GO:0005794)	cellular_component	P1	FAM20C|CDH1|WNT6|MARCHF9|TVP23A|ST6GALNAC1|CLTB|H1-0|B4GAT1|ARSL|PMEPA1|CREB3L4|CHPF|GALNT18|MR1|GALNT16|ATP8A1|C1GALT1C1|COL1A1|AJUBA|NDST4|ACHE|CHST14|RAB20|MVB12A|ST8SIA5|PLSCR1|ST3GAL2|SCARA3|RAB6A|RAB33B|CHST11|ST6GALNAC4|EMP2|PLOD3|PCSK6|P3H2|SERINC5|NEDD9|RHBDF1|HIP1|NUCB1|MDGA1|GLIPR2|MANEAL|ERGIC1|PMF1|B3GALT6|CHST3|APC2|STK24|SYT1|GALNT1|PYCARD|HS2ST1|STMN3|PRNP|APOE|HID1|POSTN|PIK3R1|N…	163	0.0039628
Golgi membrane (GO:0000139)	cellular_component	P1	MARCHF9|TVP23A|ST6GALNAC1|B4GAT1|PMEPA1|CREB3L4|CHPF|GALNT18|MR1|GALNT16|C1GALT1C1|NDST4|CHST14|ST8SIA5|ST3GAL2|SCARA3|RAB6A|RAB33B|CHST11|ST6GALNAC4|EMP2|RHBDF1|NUCB1|GLIPR2|MANEAL|ERGIC1|B3GALT6|CHST3|GALNT1|PYCARD|HS2ST1|HID1|NOTCH2|SLC35B2|ABCG1|B3GNT3|MGAT5|LFNG|TPST2|NDFIP1|HS6ST1|PLD3|PLCE1|SREBF2|TMEM132A|GAL3ST4|TMEM115|MBTPS2|GALNT17|FUT9|TRAPPC1|ZDHHC15|SNAPIN|GLCE|PDGFA|MBTPS1|HUWE1|S…	87	0.0060206
intracellular anatomical structure (GO:0005622)	cellular_component	P1	SURF6|NDN|EEF1A1P5|LSM7|FAM20C|CAPN1|ILDR2|CDH1|BMF|CCDC22|KIRREL1|ZNF219|VGLL4|EPHB2|WNT6|ATP5MC2|DDAH1|PATZ1|ARHGAP22|MARCHF9|OSBPL7|ZNF347|PKIA|BLOC1S1|SIRPA|GIPC2|TVP23A|FLNB|CASP4|CCR1|LCA5|ST6GALNAC1|ATF7|CLTB|PLCL2|ZNF835|MTMR8|GNG2|ZBED3|SAMD9|H1-0|NAGLU|SOX4|PHF6|WWTR1|APOC1|MMP23B|KDSR|RPS4Y1|RGS4|UBL4A|ZFHX3|TRIM21|PTPN14|COLGALT2|B4GAT1|MMP2|SNORD114-1|RHOC|IRF2|RPS3A|IFI6|NAV2|SULT1C…	1194	0.00503042
organelle subcompartment (GO:0031984)	cellular_component	P1	ILDR2|CDH1|MARCHF9|OSBPL7|TVP23A|CASP4|ST6GALNAC1|CLTB|MMP23B|KDSR|B4GAT1|ARSL|ATP10D|PMEPA1|CREB3L4|CHPF|EXTL2|PTPN5|GALNT18|CYP2A6|MR1|CKAP4|GALNT16|SCD|ATP8A1|DGAT2L6|APOL2|C1GALT1C1|NDST4|ESYT1|CHST14|ST8SIA5|REEP2|ACSL4|PCYT1B|ABCA1|ST3GAL2|HSD17B3|SCARA3|RAB6A|RAB33B|CHST11|RNF43|ST6GALNAC4|EMP2|PLOD3|RPS28|SLC39A1|RHBDF1|NUCB1|GLIPR2|MANEAL|ERGIC1|TMCC2|B3GALT6|LPIN3|FADS2|CHST3|FADS3|PANX…	171	0.0206886
cytoplasmic vesicle (GO:0031410)	cellular_component	P1	CAPN1|CDH1|BMF|CCDC22|WNT6|SIRPA|CLTB|TRIM21|RHOC|PMEPA1|MVP|GSN|PPIB|RAB17|UBQLN2|DLL1|MR1|CKAP4|PGAM1|ABHD6|CDKN1B|CBLIF|ATP8A1|IMPDH2|FZD2|SEMA4C|CD63|FGR|MAGED2|YWHAB|COL1A1|KCNQ1|SNX21|IL12B|INSR|ARRB2|RAB20|PLEKHO2|ANXA3|MVB12A|ZYX|ABCA1|DAB2|TUBA1A|BLOC1S5|SLC48A1|RAB6A|RAB33B|EMP2|APOA1|ELANE|GHDC|TICAM1|VDAC1|AMOTL2|TMUB1|HIP1|CTSA|NUCB1|COLEC12|KIRREL3|ITGAV|SERPINF1|SH3KBP1|ERGIC1|ITGB…	222	0.0304418
intracellular vesicle (GO:0097708)	cellular_component	P1	CAPN1|CDH1|BMF|CCDC22|WNT6|SIRPA|CLTB|TRIM21|RHOC|PMEPA1|MVP|GSN|PPIB|RAB17|UBQLN2|DLL1|MR1|CKAP4|PGAM1|ABHD6|CDKN1B|CBLIF|ATP8A1|IMPDH2|FZD2|SEMA4C|CD63|FGR|MAGED2|YWHAB|COL1A1|KCNQ1|SNX21|IL12B|INSR|ARRB2|RAB20|PLEKHO2|ANXA3|MVB12A|ZYX|ABCA1|DAB2|TUBA1A|BLOC1S5|SLC48A1|RAB6A|RAB33B|EMP2|APOA1|ELANE|GHDC|TICAM1|VDAC1|AMOTL2|TMUB1|HIP1|CTSA|NUCB1|COLEC12|KIRREL3|ITGAV|SERPINF1|SH3KBP1|ERGIC1|ITGB…	222	0.033214
inorganic ion transmembrane transport (GO:0098660)	biological_process	P2	KCNG1|SLC5A5|MCOLN2|STAC3|CEMIP|SLC4A9|ANXA2P2|SLC9A2|CASQ1|SLC30A3|PLP1|ATP2A1|GABRB1|CACNA1H|CLCA1|EDN3|ANK3|CNGA3|ANXA2|ANO9|GABRA6|CACNG8|SLC13A4|TCN2|GPM6A|TMEM38B|SLC12A3|DPP6|KCNH2|SLC15A2|CLIC5|CACNA2D4|KCNV1|ASIC2|SLC17A7|KCNH6|ACTN2|SLC6A11|STAC|SLC6A1|ASIC3|SCNN1A|ADAMTS8|PLN|CACNG7|TRDN|ATP12A|CACNA1A	48	0.0367834
cell periphery (GO:0071944)	cellular_component	P2	THSD4|PRSS21|SHISA6|RAB31|OPCML|FLRT3|ITGA2B|TIMP3|TMEM88B|VIPR1|PKP2|GPR182|TPSB2|CPNE9|MS4A2|TNFRSF13B|FMN2|TNFAIP8L3|KCNG1|SLC5A5|PAK3|COL4A3|OR3A1|NTN1|FYB2|MCOLN2|GLDN|PAPLN|ITGBL1|TRABD2B|SIGLEC7|DLGAP3|STAC3|RDH12|RAET1E|CEMIP|RASD2|RAB42|CSMD2|GRID1|SLC4A9|CLDN18|SYT4|SIGLEC10|CYP4F12|PAPPA2|ANXA2P2|SLC9A2|F2RL2|CASQ1|SLC30A3|AHNAK2|ANK1|CD48|ENPP5|PLP1|MGST1|DPEP3|RAMP1|OR7A5|GABRB1|TP53…	254	4.01224e-12
plasma membrane (GO:0005886)	cellular_component	P2	PRSS21|SHISA6|RAB31|OPCML|FLRT3|ITGA2B|TMEM88B|VIPR1|PKP2|GPR182|CPNE9|MS4A2|TNFRSF13B|FMN2|TNFAIP8L3|KCNG1|SLC5A5|PAK3|OR3A1|FYB2|MCOLN2|GLDN|ITGBL1|TRABD2B|SIGLEC7|DLGAP3|STAC3|RDH12|RAET1E|CEMIP|RASD2|RAB42|CSMD2|GRID1|SLC4A9|CLDN18|SYT4|SIGLEC10|CYP4F12|PAPPA2|ANXA2P2|SLC9A2|F2RL2|CASQ1|SLC30A3|AHNAK2|ANK1|CD48|ENPP5|PLP1|MGST1|DPEP3|RAMP1|OR7A5|GABRB1|TP53I13|PTGER2|CACNA1H|SLC35G2|COLQ|SGCZ…	222	1.73624e-07
intrinsic component of membrane (GO:0031224)	cellular_component	P2	EXTL1|PRSS21|SHISA6|OPCML|FLRT3|ITGA2B|HS3ST2|TMEM88B|VIPR1|PKP2|GPR182|PLD6|MS4A2|TNFRSF13B|YIPF7|SLC35F1|GALNTL6|KCNG1|SLC5A5|OR3A1|MCOLN2|GLDN|ITGBL1|TRABD2B|CLEC17A|SIGLEC7|STAC3|RAET1E|CSMD2|GRID1|SLC4A9|CLDN18|SYT4|SIGLEC10|CHODL|CYP4F12|IRAG1|SLC9A2|F2RL2|SLC30A3|CD48|ENPP5|PLP1|MGST1|ATP2A1|DPEP3|RAMP1|IGSF1|OR7A5|SLC25A18|GABRB1|TP53I13|PTGER2|CACNA1H|SLC35G2|UGT3A2|SGCZ|PRMT8|ADAM33|TME…	205	5.58945e-05
integral component of membrane (GO:0016021)	cellular_component	P2	EXTL1|SHISA6|FLRT3|ITGA2B|HS3ST2|TMEM88B|VIPR1|PKP2|GPR182|PLD6|MS4A2|TNFRSF13B|YIPF7|SLC35F1|GALNTL6|KCNG1|SLC5A5|OR3A1|MCOLN2|GLDN|ITGBL1|TRABD2B|CLEC17A|SIGLEC7|STAC3|RAET1E|CSMD2|GRID1|SLC4A9|CLDN18|SYT4|SIGLEC10|CHODL|CYP4F12|IRAG1|SLC9A2|F2RL2|SLC30A3|ENPP5|PLP1|MGST1|ATP2A1|RAMP1|IGSF1|OR7A5|SLC25A18|GABRB1|TP53I13|PTGER2|CACNA1H|SLC35G2|UGT3A2|SGCZ|ADAM33|TMEM119|CLCA1|OR4M2B|TRAT1|TM4SF1…	193	0.000955693
intrinsic component of plasma membrane (GO:0031226)	cellular_component	P2	SHISA6|FLRT3|ITGA2B|VIPR1|MS4A2|TNFRSF13B|KCNG1|ITGBL1|TRABD2B|SIGLEC7|GRID1|F2RL2|SLC30A3|CD48|PLP1|RAMP1|GABRB1|PTGER2|CACNA1H|SLC35G2|PRMT8|CLCA1|TRAT1|SIGLEC6|CAV2|C9|ST3GAL5|GABRA6|SEMA4A|ULBP2|EPHA5|CACNG8|SLC16A1|SLC13A4|EFNB2|SLC7A2|GPM6A|SLC12A3|NOX4|PCDHGA1|DPP6|ABCB5|IL23R|KCNH2|ADGRL4|TSPAN8|SLC15A2|TSPAN2|GRIK4|PLPPR4|MIP|MTNR1A|KCNV1|GPR55|TRAF5|ASIC2|EMB|KCNH6|MERTK|SLC6A11|KL|HTR3…	80	0.000955693
integral component of plasma membrane (GO:0005887)	cellular_component	P2	SHISA6|FLRT3|ITGA2B|VIPR1|MS4A2|TNFRSF13B|KCNG1|ITGBL1|TRABD2B|SIGLEC7|GRID1|F2RL2|SLC30A3|PLP1|RAMP1|GABRB1|PTGER2|CACNA1H|SLC35G2|CLCA1|TRAT1|SIGLEC6|CAV2|C9|ST3GAL5|GABRA6|SEMA4A|EPHA5|CACNG8|SLC16A1|SLC13A4|EFNB2|SLC7A2|GPM6A|SLC12A3|NOX4|PCDHGA1|DPP6|ABCB5|IL23R|KCNH2|ADGRL4|TSPAN8|SLC15A2|TSPAN2|GRIK4|PLPPR4|MIP|MTNR1A|KCNV1|GPR55|TRAF5|ASIC2|EMB|KCNH6|MERTK|SLC6A11|KL|HTR3B|SLC6A1|ASIC3|CN…	76	0.00158832
external encapsulating structure (GO:0030312)	cellular_component	P2	THSD4|FLRT3|TIMP3|TPSB2|COL4A3|NTN1|PAPLN|ANXA2P2|COLQ|ANXA2|SOD3|FBLN5|NTN3|COL7A1|PKHD1L1|WNT2B|LRRN3|LINGO4|TPSAB1|CCN4|CCN3|CPA3|KNG1|ANGPTL5|NTN5|VIT|AZGP1|TIMP4|DGCR6|LINGO2|ADAMTS8|COL8A1|CBLN4|PTN|SERPINF2|ADAMTS6	36	0.000955693
extracellular matrix (GO:0031012)	cellular_component	P2	THSD4|FLRT3|TIMP3|TPSB2|COL4A3|NTN1|PAPLN|ANXA2P2|COLQ|ANXA2|SOD3|FBLN5|NTN3|COL7A1|WNT2B|LRRN3|LINGO4|TPSAB1|CCN4|CCN3|CPA3|KNG1|ANGPTL5|NTN5|VIT|AZGP1|TIMP4|DGCR6|LINGO2|ADAMTS8|COL8A1|CBLN4|PTN|SERPINF2|ADAMTS6	35	0.0017563
collagen-containing extracellular matrix (GO:0062023)	cellular_component	P2	THSD4|TIMP3|TPSB2|COL4A3|NTN1|ANXA2P2|COLQ|ANXA2|SOD3|FBLN5|NTN3|COL7A1|WNT2B|TPSAB1|CCN3|CPA3|KNG1|ANGPTL5|NTN5|VIT|AZGP1|ADAMTS8|COL8A1|CBLN4|PTN|SERPINF2	26	0.0264158
basement membrane (GO:0005604)	cellular_component	P2	COL4A3|NTN1|ANXA2P2|COLQ|ANXA2|NTN3|COL7A1|NTN5|COL8A1|PTN	10	0.0391991
contractile fiber (GO:0043292)	cellular_component	P2	MYL4|TTN|FBXL22|CASQ1|AHNAK2|ANK1|FHL5|ANK3|KY|TNNC1|MYH11|MYH3|ACTN2|SYNC|LDB3|ACTA2|TIMP4|SYNE1	18	0.0173604
sarcomere (GO:0030017)	cellular_component	P2	MYL4|TTN|FBXL22|CASQ1|AHNAK2|ANK1|FHL5|ANK3|KY|TNNC1|MYH3|ACTN2|SYNC|LDB3|TIMP4|SYNE1	16	0.0312989
transporter complex (GO:1990351)	cellular_component	P2	SHISA6|KCNG1|STAC3|ATP2A1|GABRB1|CACNA1H|CNGA3|GABRA6|CACNG8|DPP6|KCNH2|CLIC5|GRIK4|CACNA2D4|KCNV1|HTR3B|SCNN1A|PLN|ATP10B|CACNG7|ATP12A|CACNA1A	22	0.0312989
transmembrane transporter complex (GO:1902495)	cellular_component	P2	SHISA6|KCNG1|STAC3|ATP2A1|GABRB1|CACNA1H|CNGA3|GABRA6|CACNG8|DPP6|KCNH2|CLIC5|GRIK4|CACNA2D4|KCNV1|HTR3B|SCNN1A|PLN|CACNG7|ATP12A|CACNA1A	21	0.0384914
membrane (GO:0016020)	cellular_component	P2	EXTL1|PRSS21|SHISA6|RAB31|OPCML|FLRT3|ITGA2B|HS3ST2|TMEM88B|VIPR1|PKP2|GPR182|CPNE9|PLD6|MS4A2|TNFRSF13B|FMN2|YIPF7|SLC35F1|GALNTL6|TNFAIP8L3|KCNG1|SLC5A5|ACADL|PAK3|OR3A1|FYB2|MCOLN2|GLDN|ITGBL1|TRABD2B|CLEC17A|SIGLEC7|DLGAP3|STAC3|RDH12|RAET1E|PIP5KL1|CEMIP|RASD2|RAB42|CSMD2|GRID1|SLC4A9|CLDN18|SYT4|SIGLEC10|CHODL|CYP4F12|PAPPA2|IRAG1|ANXA2P2|SLC9A2|F2RL2|CASQ1|SLC30A3|AHNAK2|ANK1|PGLYRP2|CD48|…	300	0.0312989
plasma membrane region (GO:0098590)	cellular_component	P2	SHISA6|FLRT3|RDH12|CEMIP|GRID1|SLC4A9|CYP4F12|PAPPA2|F2RL2|ANK1|GABRB1|ANK3|DOCK8|STX1B|ANXA2|CAV2|EPS8L2|GABRA6|TMEM231|CACNG8|PLB1|SLC16A1|EFNB2|TF|CD300LG|VSIG1|GPM6A|SLC12A3|DPEP1|NOX4|PLET1|MAP7|SLC15A2|NRGN|CLIC5|GRIK4|PLPPR4|MIP|SGIP1|ACTN2|SLC6A11|KL|HTR3B|PROM2|SCNN1A|SLC16A12|CACNG7|CNKSR3|ACKR3|SYNE1|BMX|MX2|HPGD|MUSK	54	0.0431151
sexual reproduction (GO:0019953)	biological_process	P3	STX2|MAEL|RACGAP1|SPATA24|CFAP157|TESK2|SPESP1|PRDM9|CFAP206|PTTG1|NOX5|SLC9B1|MEIKIN|TDRD6|NPHP1|DEFB1|FOXJ1|BRCA2|ROPN1L|SPA17|KNL1|KCNU1|CCDC63|GLRA1|MST1R|TEX19|ZPBP2|SPATA31C1|H1-1|CATSPER2|PRM1|ADAM18|C9orf24|PLCZ1|GLIPR1L1|NME5|FSIP2|BRDT|HROB|TSSK4|OAZ3|RSPH6A|VIP|MEIOB|IQCG|CDK1|GTSF1|POU4F2|HOATZ|PMFBP1|TCP11|SPEF2|SPATA31D3|SPATA31A1|DKKL1|AKAP3|SPATA6L|TXNDC8|ELL3|TRIP13|ZNF541|SPATA2…	324	1.89469e-76
multi-organism reproductive process (GO:0044703)	biological_process	P3	STX2|MAEL|RACGAP1|SPATA24|CFAP157|TESK2|SPESP1|PRDM9|CFAP206|PTTG1|NOX5|SLC9B1|MEIKIN|TDRD6|NPHP1|DEFB1|FOXJ1|BRCA2|ROPN1L|SPA17|KNL1|KCNU1|CCDC63|GLRA1|MST1R|TEX19|ZPBP2|SPATA31C1|H1-1|CATSPER2|PRM1|ADAM18|C9orf24|PLCZ1|GLIPR1L1|NME5|FSIP2|BRDT|HROB|TSSK4|OAZ3|RSPH6A|VIP|MEIOB|IQCG|CDK1|GTSF1|PZP|POU4F2|HOATZ|PMFBP1|TCP11|SPEF2|SPATA31D3|SPATA31A1|DKKL1|AKAP3|SPATA6L|TXNDC8|ELL3|TRIP13|ZNF541|SP…	335	1.57531e-62
multi-organism process (GO:0051704)	biological_process	P3	STX2|MAEL|RACGAP1|SPATA24|CFAP157|TESK2|SPESP1|PRDM9|CFAP206|PTTG1|NOX5|SLC9B1|MEIKIN|TDRD6|NPHP1|DEFB1|FOXJ1|BRCA2|ROPN1L|SPA17|KNL1|KCNU1|CCDC63|GLRA1|MST1R|TEX19|ZPBP2|SPATA31C1|H1-1|CATSPER2|PRM1|ADAM18|C9orf24|PLCZ1|GLIPR1L1|NME5|FSIP2|BRDT|HROB|TSSK4|OAZ3|RSPH6A|VIP|MEIOB|IQCG|CDK1|GTSF1|PZP|POU4F2|HOATZ|PMFBP1|TCP11|SPEF2|SPATA31D3|SPATA31A1|DKKL1|AKAP3|SPATA6L|NUP88|TXNDC8|ELL3|TRIP13|ZNF…	341	4.41275e-55
spermatogenesis (GO:0007283)	biological_process	P3	MAEL|RACGAP1|SPATA24|CFAP157|TESK2|CFAP206|PTTG1|TDRD6|NPHP1|DEFB1|FOXJ1|BRCA2|ROPN1L|SPA17|KNL1|CCDC63|TEX19|ZPBP2|SPATA31C1|H1-1|CATSPER2|PRM1|ADAM18|C9orf24|NME5|FSIP2|BRDT|TSSK4|OAZ3|RSPH6A|IQCG|GTSF1|POU4F2|HOATZ|PMFBP1|TCP11|SPEF2|SPATA31D3|SPATA31A1|SPATA6L|TXNDC8|ELL3|TRIP13|ZNF541|SPATA9|HOOK1|CCDC136|TMF1|SHCBP1L|DAZL|SPO11|CAPZA3|YBX2|DMC1|PRM3|ZNF35|CFAP97D1|TSSK6|OVOL1|SOHLH2|ADCY10|…	240	4.08654e-70
multicellular organismal reproductive process (GO:0048609)	biological_process	P3	MAEL|RACGAP1|SPATA24|CFAP157|TESK2|OPRM1|PRDM9|CFAP206|PTTG1|MEIKIN|TDRD6|NPHP1|DEFB1|FOXJ1|BRCA2|ROPN1L|SPA17|KNL1|CCDC63|TEX19|ZPBP2|SPATA31C1|H1-1|CATSPER2|PRM1|ADAM18|C9orf24|NME5|FSIP2|BRDT|HROB|TSSK4|OAZ3|RSPH6A|VIP|MEIOB|IQCG|GTSF1|POU4F2|HOATZ|PMFBP1|TCP11|SPEF2|SPATA31D3|SPATA31A1|DKKL1|SPATA6L|TXNDC8|ELL3|TRIP13|ZNF541|SPATA22|SPATA9|HOOK1|CCDC136|TMF1|SHCBP1L|DAZL|SPO11|CAPZA3|YBX2|DMC…	280	2.16013e-54
male gamete generation (GO:0048232)	biological_process	P3	MAEL|RACGAP1|SPATA24|CFAP157|TESK2|PRDM9|CFAP206|PTTG1|MEIKIN|TDRD6|NPHP1|DEFB1|FOXJ1|BRCA2|ROPN1L|SPA17|KNL1|CCDC63|TEX19|ZPBP2|SPATA31C1|H1-1|CATSPER2|PRM1|ADAM18|C9orf24|NME5|FSIP2|BRDT|HROB|TSSK4|OAZ3|RSPH6A|MEIOB|IQCG|GTSF1|POU4F2|HOATZ|PMFBP1|TCP11|SPEF2|SPATA31D3|SPATA31A1|SPATA6L|TXNDC8|ELL3|TRIP13|ZNF541|SPATA9|HOOK1|CCDC136|TMF1|SHCBP1L|DAZL|SPO11|CAPZA3|YBX2|DMC1|PRM3|ZNF35|CFAP97D1|TS…	252	2.64729e-75
gamete generation (GO:0007276)	biological_process	P3	MAEL|RACGAP1|SPATA24|CFAP157|TESK2|PRDM9|CFAP206|PTTG1|MEIKIN|TDRD6|NPHP1|DEFB1|FOXJ1|BRCA2|ROPN1L|SPA17|KNL1|CCDC63|TEX19|ZPBP2|SPATA31C1|H1-1|CATSPER2|PRM1|ADAM18|C9orf24|NME5|FSIP2|BRDT|HROB|TSSK4|OAZ3|RSPH6A|MEIOB|IQCG|GTSF1|POU4F2|HOATZ|PMFBP1|TCP11|SPEF2|SPATA31D3|SPATA31A1|SPATA6L|TXNDC8|ELL3|TRIP13|ZNF541|SPATA22|SPATA9|HOOK1|CCDC136|TMF1|SHCBP1L|DAZL|SPO11|CAPZA3|YBX2|DMC1|CTCFL|PRM3|ZNF…	268	1.78268e-64
multicellular organism reproduction (GO:0032504)	biological_process	P3	MAEL|RACGAP1|SPATA24|CFAP157|TESK2|SPESP1|OPRM1|PRDM9|CFAP206|PTTG1|NOX5|MEIKIN|TDRD6|NPHP1|DEFB1|FOXJ1|BRCA2|ROPN1L|SPA17|KNL1|CCDC63|TEX19|ZPBP2|SPATA31C1|H1-1|CATSPER2|PRM1|ADAM18|C9orf24|NME5|FSIP2|BRDT|HROB|TSSK4|OAZ3|RSPH6A|VIP|MEIOB|IQCG|GTSF1|POU4F2|HOATZ|PMFBP1|TCP11|SPEF2|SPATA31D3|SPATA31A1|DKKL1|SPATA6L|TXNDC8|ELL3|TRIP13|ZNF541|SPATA22|SPATA9|C16orf92|HOOK1|CCDC136|TMF1|SHCBP1L|DAZL|…	292	7.0033e-59
developmental process involved in reproduction (GO:0003006)	biological_process	P3	MAEL|RACGAP1|SPATA24|CFAP157|TESK2|TNC|CFAP206|DMRT3|PTTG1|GJB5|TDRD6|NPHP1|DEFB1|FOXJ1|BRCA2|ROPN1L|SPA17|KNL1|CCDC63|MC2R|TEX19|ZPBP2|SPATA31C1|H1-1|CATSPER2|PRM1|ADAM18|C9orf24|NME5|FSIP2|BRDT|TSSK4|OAZ3|RSPH6A|IQCG|GTSF1|POU4F2|HOATZ|PMFBP1|TCP11|SPEF2|SPATA31D3|ETV2|SPATA31A1|SPATA6L|TXNDC8|ELL3|TRIP13|ZNF541|HNF4A|SPATA9|HOOK1|CCDC136|TMF1|SHCBP1L|DAZL|SPO11|CAPZA3|YBX2|DMC1|PRM3|ZNF35|ADAM…	284	1.2881e-41
reproductive process (GO:0022414)	biological_process	P3	STX2|MAEL|RACGAP1|SPATA24|CFAP157|TESK2|SMC1B|SPESP1|OPRM1|PRDM9|TNC|CFAP206|DMRT3|LRRC52|PTTG1|NPHP4|GJB5|NOX5|SLC9B1|MEIKIN|TDRD6|NPHP1|DEFB1|FOXJ1|CCNE1|BRCA2|ROPN1L|SPA17|KNL1|REC114|KCNU1|CCDC63|GLRA1|MC2R|MST1R|TEX19|ZPBP2|SPATA31C1|H1-1|CATSPER2|GAPDHS|PRM1|ADAM18|C9orf24|PLCZ1|GLIPR1L1|NME5|DNAH11|FSIP2|BRDT|HROB|TSSK4|OAZ3|RSPH6A|VIP|MEIOB|SYCE1|ESPL1|IQCG|CDK1|GTSF1|TUBG1|PZP|POU4F2|HOA…	433	1.0925e-67
reproduction (GO:0000003)	biological_process	P3	STX2|MAEL|RACGAP1|SPATA24|CFAP157|TESK2|SMC1B|SPESP1|OPRM1|PRDM9|TNC|CFAP206|DMRT3|LRRC52|PTTG1|NPHP4|GJB5|NOX5|SLC9B1|MEIKIN|TDRD6|NPHP1|DEFB1|FOXJ1|CCNE1|BRCA2|ROPN1L|SPA17|KNL1|REC114|KCNU1|CCDC63|GLRA1|MC2R|MST1R|TEX19|ZPBP2|SPATA31C1|H1-1|CATSPER2|GAPDHS|PRM1|ADAM18|C9orf24|PLCZ1|GLIPR1L1|NME5|DNAH11|FSIP2|BRDT|HROB|TSSK4|OAZ3|RSPH6A|VIP|MEIOB|SYCE1|ESPL1|IQCG|CDK1|GTSF1|TUBG1|PZP|POU4F2|HOA…	433	1.79253e-67
cilium movement (GO:0003341)	biological_process	P3	CFAP157|CFAP206|NPHP4|SLC9B1|DEFB1|ROPN1L|SPA17|CCDC63|CATSPER2|GAPDHS|NME5|DNAH11|FSIP2|TSSK4|RSPH6A|IQCG|CFAP46|STK36|HOATZ|ODAD3|SPEF2|DNAI4|ENKUR|TMF1|TEKT1|CFAP221|PRM3|CFAP97D1|ODAD2|CFAP61|ADCY10|ZBBX|CFAP69|CFAP53|TNP1|DNAH17|CFAP44|JHY|RSPH9|ZMYND10|ROPN1|CCDC40|CFAP100|RSPH4A|SLC22A16|NME8|CABYR|HYDIN|CFAP43|EFCAB9|DRC7|TTLL9|MEIG1|DNAI2|DNAH1|SLC26A8|DNAAF4|ODAD1|TTC21A|TTC29|CCDC65|DN…	105	7.10669e-50
cilium-dependent cell motility (GO:0060285)	biological_process	P3	CFAP157|CFAP206|NPHP4|SLC9B1|DEFB1|ROPN1L|CATSPER2|GAPDHS|DNAH11|FSIP2|TSSK4|RSPH6A|IQCG|DNAH8|CFAP46|HOATZ|SPEF2|ENKUR|TMF1|TEKT1|PRM3|CFAP97D1|CFAP69|TNP1|DNAH2|DNAH17|CFAP44|RSPH9|ROPN1|CCDC40|RSPH4A|SLC22A16|NME8|CFAP43|EFCAB9|DRC7|TTLL9|MEIG1|DNAH1|SLC26A8|DNAH6|TTC21A|CCDC65|DNAH7|CATSPER3|TAC4|TEX101|IQCF1|EFHC1|SMCP|EFHC2|ROPN1B|CFAP54|TEKT3|DNAH14|ATP1A4|TCTE1|CATSPER4|DDX4|DPCD|QRICH2|T…	79	3.7435e-36
cilium or flagellum-dependent cell motility (GO:0001539)	biological_process	P3	CFAP157|CFAP206|NPHP4|SLC9B1|DEFB1|ROPN1L|CATSPER2|GAPDHS|DNAH11|FSIP2|TSSK4|RSPH6A|IQCG|DNAH8|CFAP46|HOATZ|SPEF2|ENKUR|TMF1|TEKT1|PRM3|CFAP97D1|CFAP69|TNP1|DNAH2|DNAH17|CFAP44|RSPH9|ROPN1|CCDC40|RSPH4A|SLC22A16|NME8|CFAP43|EFCAB9|DRC7|TTLL9|MEIG1|DNAH1|SLC26A8|DNAH6|TTC21A|CCDC65|DNAH7|CATSPER3|TAC4|TEX101|IQCF1|EFHC1|SMCP|EFHC2|ROPN1B|CFAP54|TEKT3|DNAH14|ATP1A4|TCTE1|CATSPER4|DDX4|DPCD|QRICH2|T…	79	3.7435e-36
cilium movement involved in cell motility (GO:0060294)	biological_process	P3	CFAP157|CFAP206|NPHP4|SLC9B1|DEFB1|ROPN1L|CATSPER2|GAPDHS|DNAH11|FSIP2|TSSK4|RSPH6A|IQCG|CFAP46|HOATZ|SPEF2|ENKUR|TMF1|TEKT1|PRM3|CFAP97D1|CFAP69|TNP1|CFAP44|RSPH9|ROPN1|CCDC40|RSPH4A|SLC22A16|NME8|CFAP43|EFCAB9|DRC7|TTLL9|MEIG1|DNAH1|SLC26A8|TTC21A|CATSPER3|TAC4|TEX101|IQCF1|SMCP|ROPN1B|CFAP54|TEKT3|ATP1A4|TCTE1|CATSPER4|DDX4|DPCD|QRICH2|TEKT2|ARMC2|CFAP65|DNAAF6|DNAAF11|SPEM1|DNAI1|CFAP251|CATS…	69	1.74667e-30
flagellated sperm motility (GO:0030317)	biological_process	P3	CFAP157|CFAP206|NPHP4|SLC9B1|DEFB1|ROPN1L|CATSPER2|GAPDHS|DNAH11|FSIP2|TSSK4|IQCG|HOATZ|SPEF2|ENKUR|TMF1|PRM3|CFAP97D1|CFAP69|TNP1|CFAP44|ROPN1|CCDC40|SLC22A16|NME8|CFAP43|EFCAB9|DRC7|TTLL9|MEIG1|DNAH1|SLC26A8|TTC21A|CATSPER3|TAC4|TEX101|IQCF1|SMCP|ROPN1B|TEKT3|ATP1A4|TCTE1|CATSPER4|DDX4|DPCD|QRICH2|TEKT2|ARMC2|CFAP65|DNAAF6|DNAAF11|SPEM1|DNAI1|CFAP251|CATSPER1|TTC12|CATSPERD|SLC9C1|TPPP2|PRSS55|…	61	6.51385e-27
sperm motility (GO:0097722)	biological_process	P3	CFAP157|CFAP206|NPHP4|SLC9B1|DEFB1|ROPN1L|CATSPER2|GAPDHS|DNAH11|FSIP2|TSSK4|IQCG|HOATZ|SPEF2|ENKUR|TMF1|PRM3|CFAP97D1|CFAP69|TNP1|CFAP44|ROPN1|CCDC40|SLC22A16|NME8|CFAP43|EFCAB9|DRC7|TTLL9|MEIG1|DNAH1|SLC26A8|TTC21A|CATSPER3|TAC4|TEX101|IQCF1|SMCP|ROPN1B|TEKT3|ATP1A4|TCTE1|CATSPER4|DDX4|DPCD|QRICH2|TEKT2|ARMC2|CFAP65|DNAAF6|DNAAF11|SPEM1|DNAI1|CFAP251|CATSPER1|TTC12|CATSPERD|SLC9C1|TPPP2|PRSS55|…	61	6.51385e-27
cellular process involved in reproduction in multicellular organism (GO:0022412)	biological_process	P3	MAEL|CFAP157|SPESP1|CFAP206|NOX5|MEIKIN|NPHP1|DEFB1|BRCA2|ROPN1L|KNL1|CCDC63|TEX19|ZPBP2|CATSPER2|NME5|FSIP2|BRDT|TSSK4|RSPH6A|MEIOB|IQCG|TCP11|SPEF2|TXNDC8|TRIP13|C16orf92|HOOK1|CCDC136|TMF1|SHCBP1L|DAZL|SPO11|CAPZA3|YBX2|DMC1|CTCFL|CFAP97D1|SPIRE1|TSSK6|SOHLH2|EQTN|CFAP69|BRIP1|BNC1|TDRD5|MOV10L1|ADAM2|TMEM95|IHO1|RSPH1|SLC2A8|TNP1|DPY19L2P1|CCDC42|ADAD1|GPR149|CFAP44|SPAM1|AURKC|TBPL1|KIF18A|P…	156	2.16318e-44
microtubule-based movement (GO:0007018)	biological_process	P3	RACGAP1|CFAP157|CFAP206|NPHP4|KIF15|SLC9B1|DEFB1|IFT88|ROPN1L|SPA17|CCDC63|CATSPER2|KIF20A|GAPDHS|NME5|DNAH11|FSIP2|KIF3B|TSSK4|RSPH6A|IQCG|DNAH8|CFAP46|KIF24|STK36|HOATZ|ODAD3|SPEF2|DNAI4|ENKUR|KIF14|MAPT|KIF4B|KIF23|CENPE|TMF1|TEKT1|CFAP221|PRM3|CFAP97D1|ODAD2|CNIH2|CFAP61|ADCY10|ZBBX|CFAP69|AP3B2|CFAP53|DNAH12|KIF9|DYNC2I2|TMEM108|DNAH10|TNP1|WASF1|DNAH2|DNAH17|CFAP44|RAB27B|JHY|KIF18A|RSPH9|Z…	157	2.67953e-42
microtubule-based process (GO:0007017)	biological_process	P3	CEP76|RACGAP1|CFAP157|CFAP206|CEP63|C10orf90|NPHP4|KIF15|KNSTRN|SLC9B1|DEFB1|IFT88|FOXJ1|BRCA2|MCIDAS|ROPN1L|GTSE1|SPA17|INSC|CCDC63|POC1B|CATSPER2|KIF20A|GAPDHS|NME5|DNAH11|CEP250|FSIP2|KIF3B|TSSK4|RSPH6A|CEP152|ESPL1|IQCG|CDK1|DNAH8|CFAP46|TUBG1|KIF24|STK36|HOATZ|ODAD3|SPEF2|DNAI4|ENKUR|KIF14|PKHD1|MAPT|BRCA1|PRC1|KIF4B|HOOK1|DNAL1|KIF23|CENPE|CETN3|TMF1|CENPA|TTLL2|TEKT1|CFAP221|SPATA7|TTBK2|P…	261	8.21218e-41
meiosis I (GO:0007127)	biological_process	P3	MAEL|PRDM9|PTTG1|MEIKIN|CCNE1|BRCA2|TEX19|BRDT|MEIOB|SYCE1|ESPL1|C11orf80|CCNE2|FANCM|TRIP13|SPATA22|SPO11|DMC1|BRIP1|MOV10L1|IHO1|TERB2|SLC2A8|C1orf146|RNF212B|MEI1|ANKRD31|MND1|RAD54L|PSMA8|SGO2|RAD51AP1|KASH5|MEIOC|TEX15|RAD51|HFM1|SYCP3|MYBL1|TEX12|M1AP|HORMAD1|SLX4|SYCP1|HSF2BP|TDRD9|PSMC3IP|EME1|C14orf39|ZCWPW1|SYCE2|PLK1|DDX4|CNTD1|TOP2A|SYCE1L|REC8|MSH4|MAJIN|SYCP2|FANCD2|TERB1|SYCE3|SGO1…	71	3.75491e-29
reciprocal homologous recombination (GO:0140527)	biological_process	P3	PRDM9|TEX19|MEIOB|C11orf80|FANCM|TRIP13|SPO11|DMC1|BRIP1|C1orf146|RNF212B|ANKRD31|MND1|RAD54L|RAD51AP1|RAD51|HFM1|SLX4|SYCP1|HSF2BP|PSMC3IP|EME1|C14orf39|CNTD1|TOP2A|REC8|MSH4|FANCD2|SYCE3|TEX11|PRDM7	31	1.07374e-10
reciprocal meiotic recombination (GO:0007131)	biological_process	P3	PRDM9|TEX19|MEIOB|C11orf80|FANCM|TRIP13|SPO11|DMC1|BRIP1|C1orf146|RNF212B|ANKRD31|MND1|RAD54L|RAD51AP1|RAD51|HFM1|SLX4|SYCP1|HSF2BP|PSMC3IP|EME1|C14orf39|CNTD1|TOP2A|REC8|MSH4|FANCD2|SYCE3|TEX11|PRDM7	31	1.07374e-10
homologous recombination (GO:0035825)	biological_process	P3	PRDM9|TEX19|MEIOB|C11orf80|FANCM|TRIP13|SPO11|DMC1|BRIP1|C1orf146|RNF212B|ANKRD31|MND1|RAD54L|RAD51AP1|RAD51|HFM1|SLX4|SYCP1|HSF2BP|PSMC3IP|EME1|C14orf39|CNTD1|TOP2A|REC8|MSH4|FANCD2|SYCE3|TEX11|PRDM7	31	3.50469e-10
meiotic attachment of telomere to nuclear envelope (GO:0070197)	biological_process	P3	TERB2|MAJIN|TERB1|RAD21L1	4	0.0326772
meiotic telomere tethering at nuclear periphery (GO:0044821)	biological_process	P3	TERB2|MAJIN|TERB1|RAD21L1	4	0.0326772
telomere tethering at nuclear periphery (GO:0034398)	biological_process	P3	TERB2|MAJIN|TERB1|RAD21L1	4	0.0326772
meiotic chromosome segregation (GO:0045132)	biological_process	P3	MAEL|PRDM9|PTTG1|MEIKIN|CCNE1|MEIOB|SYCE1|ESPL1|CCNE2|FANCM|TRIP13|HORMAD2|SPATA22|SPO11|DMC1|BRIP1|IHO1|TERB2|C1orf146|NUF2|RNF212B|ANKRD31|BUB1B|SGO2|KASH5|MEIOC|TEX15|HFM1|TEX12|M1AP|HORMAD1|SLX4|SYCP1|EME1|MOS|TTK|C14orf39|ZCWPW1|SYCE2|PLK1|TOP2A|SYCE1L|REC8|MSH4|MAJIN|SYCP2|FANCD2|TERB1|SYCE3|SGO1|RAD21L1|STAG3|TEX11|BUB1	54	6.44765e-23
synaptonemal complex assembly (GO:0007130)	biological_process	P3	SYCE1|TRIP13|SPO11|C1orf146|MEIOC|TEX12|HORMAD1|SYCP1|SYCE2|SYCE1L|REC8|SYCP2|SYCE3|RAD21L1|STAG3|TEX11	16	2.44003e-08
homologous chromosome pairing at meiosis (GO:0007129)	biological_process	P3	MAEL|PRDM9|CCNE1|MEIOB|SYCE1|CCNE2|TRIP13|SPATA22|SPO11|DMC1|BRIP1|IHO1|TERB2|C1orf146|RNF212B|ANKRD31|KASH5|MEIOC|TEX15|TEX12|HORMAD1|SYCP1|C14orf39|ZCWPW1|SYCE2|SYCE1L|REC8|MSH4|MAJIN|SYCP2|FANCD2|TERB1|SYCE3|RAD21L1|STAG3|TEX11	36	3.46468e-19
chromosome organization involved in meiotic cell cycle (GO:0070192)	biological_process	P3	MAEL|PRDM9|MEIKIN|CCNE1|MEIOB|SYCE1|CCNE2|TRIP13|HORMAD2|SPATA22|SPO11|DMC1|BRIP1|IHO1|TERB2|C1orf146|RNF212B|ANKRD31|BUB1B|SGO2|KASH5|MEIOC|TEX15|RAD51|TEX12|HORMAD1|SYCP1|C14orf39|ZCWPW1|SYCE2|SYCE1L|REC8|MSH4|MAJIN|SYCP2|FANCD2|TERB1|SYCE3|SGO1|RAD21L1|STAG3|TEX11|BUB1	43	8.00882e-20
synaptonemal complex organization (GO:0070193)	biological_process	P3	SYCE1|TRIP13|SPO11|C1orf146|MEIOC|TEX12|HORMAD1|SYCP1|SYCE2|PLK1|SYCE1L|REC8|SYCP2|SYCE3|RAD21L1|HSPA2|STAG3|TEX11	18	2.66493e-09
meiosis I cell cycle process (GO:0061982)	biological_process	P3	MAEL|PRDM9|PTTG1|MEIKIN|CCNE1|BRCA2|TEX19|BRDT|MEIOB|SYCE1|ESPL1|C11orf80|CCNE2|FANCM|TRIP13|SPATA22|SPO11|DMC1|BRIP1|MOV10L1|IHO1|TERB2|SLC2A8|C1orf146|RNF212B|MEI1|ANKRD31|MND1|RAD54L|PSMA8|SGO2|RAD51AP1|KASH5|MEIOC|TEX15|RAD51|HFM1|SYCP3|CDC25C|MYBL1|TEX12|M1AP|HORMAD1|SLX4|SYCP1|HSF2BP|TDRD9|PSMC3IP|EME1|C14orf39|ZCWPW1|SYCE2|PLK1|DDX4|CNTD1|TOP2A|SYCE1L|REC8|MSH4|MAJIN|SYCP2|FANCD2|CDC25A|TE…	73	1.71264e-29
meiotic cell cycle (GO:0051321)	biological_process	P3	MAEL|SMC1B|PRDM9|PTTG1|MEIKIN|CCNE1|BRCA2|REC114|TEX19|BRDT|MEIOB|SYCE1|ESPL1|TUBG1|C11orf80|CCNE2|FANCM|TRIP13|HORMAD2|SPATA22|SHCBP1L|SPO11|DMC1|SPIRE1|MCMDC2|OVOL1|BRIP1|MOV10L1|SYCP2L|IHO1|RSPH1|TERB2|SLC2A8|C1orf146|NUF2|EXD1|RNF212B|MEI1|ANKRD31|MND1|RAD54L|BUB1B|AURKC|PSMA8|KIF18A|SGO2|PIWIL1|PKMYT1|RAD51AP1|CCNB3|KASH5|TEX14|OOEP|MEIOC|TEX15|RAD51|HFM1|EXO1|SYCP3|CDC25C|DUSP13|MYBL1|TEX12…	119	1.45899e-37
meiotic cell cycle process (GO:1903046)	biological_process	P3	MAEL|PRDM9|PTTG1|MEIKIN|CCNE1|BRCA2|TEX19|BRDT|MEIOB|SYCE1|ESPL1|TUBG1|C11orf80|CCNE2|FANCM|TRIP13|HORMAD2|SPATA22|SHCBP1L|SPO11|DMC1|SPIRE1|OVOL1|BRIP1|MOV10L1|SYCP2L|IHO1|TERB2|SLC2A8|C1orf146|NUF2|RNF212B|MEI1|ANKRD31|MND1|RAD54L|BUB1B|PSMA8|KIF18A|SGO2|RAD51AP1|KASH5|TEX14|OOEP|MEIOC|TEX15|RAD51|HFM1|SYCP3|CDC25C|MYBL1|TEX12|M1AP|HORMAD1|SLX4|SYCP1|HSF2BP|MEIOSIN|CDC20|TDRD9|TOPAZ1|PSMC3IP|EM…	95	7.55937e-32
meiotic nuclear division (GO:0140013)	biological_process	P3	MAEL|PRDM9|PTTG1|MEIKIN|CCNE1|BRCA2|TEX19|BRDT|MEIOB|SYCE1|ESPL1|C11orf80|CCNE2|FANCM|TRIP13|HORMAD2|SPATA22|SHCBP1L|SPO11|DMC1|SPIRE1|BRIP1|MOV10L1|SYCP2L|IHO1|TERB2|SLC2A8|C1orf146|NUF2|RNF212B|MEI1|ANKRD31|MND1|RAD54L|BUB1B|PSMA8|KIF18A|SGO2|RAD51AP1|KASH5|TEX14|OOEP|MEIOC|TEX15|RAD51|HFM1|SYCP3|MYBL1|TEX12|M1AP|HORMAD1|SLX4|SYCP1|HSF2BP|MEIOSIN|CDC20|TDRD9|PSMC3IP|EME1|MOS|TTK|C14orf39|ZCWPW1…	90	1.27996e-31
homologous chromosome segregation (GO:0045143)	biological_process	P3	MAEL|PRDM9|PTTG1|MEIKIN|CCNE1|MEIOB|SYCE1|ESPL1|CCNE2|TRIP13|SPATA22|SPO11|DMC1|BRIP1|IHO1|TERB2|C1orf146|RNF212B|ANKRD31|SGO2|KASH5|MEIOC|TEX15|TEX12|HORMAD1|SYCP1|C14orf39|ZCWPW1|SYCE2|PLK1|SYCE1L|REC8|MSH4|MAJIN|SYCP2|FANCD2|TERB1|SYCE3|SGO1|RAD21L1|STAG3|TEX11	42	3.30402e-21
male meiotic nuclear division (GO:0007140)	biological_process	P3	MAEL|MEIKIN|BRCA2|TEX19|BRDT|MEIOB|TRIP13|SHCBP1L|SPO11|DMC1|MOV10L1|SLC2A8|KIF18A|TEX14|MEIOC|TEX15|SYCP3|MYBL1|M1AP|HSF2BP|TDRD9|DDX4|REC8|FANCA|SYCP2|SPDYA|HSPA2|TEX11|CCNA1|ASZ1	30	1.45759e-13
female gamete generation (GO:0007292)	biological_process	P3	PRDM9|MEIKIN|BRCA2|HROB|MEIOB|TRIP13|SPO11|YBX2|DMC1|SPIRE1|SOHLH2|BNC1|TDRD5|IHO1|GPR149|AURKC|KASH5|MEIOC|M1AP|HORMAD1|TNFAIP6|MEIOSIN|FSHB|TTK|C14orf39|MCM8|PLK1|GDF9|TOP2A|REC8|MSH4|POMZP3|SYCP2|NPM2|CCNB2	35	0.00297723
double-strand break repair involved in meiotic recombination (GO:1990918)	biological_process	P3	PRDM9|SPO11|BRIP1|HSF2BP|FANCD2	5	0.0258276
chromosome localization to nuclear envelope involved in homologous chromosome segregation (GO:0090220)	biological_process	P3	SPO11|TERB2|KASH5|MAJIN|TERB1|RAD21L1	6	0.0326772
telomere localization (GO:0034397)	biological_process	P3	SPO11|TERB2|KASH5|MAJIN|TERB1|RAD21L1	6	0.0326772
spermatid differentiation (GO:0048515)	biological_process	P3	CFAP157|CFAP206|NPHP1|DEFB1|ROPN1L|KNL1|CCDC63|ZPBP2|CATSPER2|NME5|FSIP2|TSSK4|RSPH6A|IQCG|TCP11|SPEF2|TXNDC8|TRIP13|HOOK1|CCDC136|TMF1|SPO11|CAPZA3|DMC1|CFAP97D1|TSSK6|CFAP69|BRIP1|TDRD5|RSPH1|TNP1|DPY19L2P1|CCDC42|ADAD1|CFAP44|TBPL1|PIWIL1|RFX2|ROPN1|ACRBP|MEIOC|SUN5|CABYR|SYCP3|CFAP43|EFCAB9|CFTR|MAST2|MEIG1|SOX30|DNAH1|SYCP1|SLC26A8|FAM9B|DPY19L2|PDILT|TTC21A|CATSPER3|TSSK1B|IQCF1|FAM9C|TOPAZ…	91	1.22064e-36
spermatid development (GO:0007286)	biological_process	P3	CFAP157|CFAP206|DEFB1|ROPN1L|KNL1|CCDC63|ZPBP2|CATSPER2|NME5|FSIP2|TSSK4|RSPH6A|IQCG|TCP11|SPEF2|TXNDC8|TRIP13|HOOK1|CCDC136|TMF1|SPO11|CAPZA3|DMC1|CFAP97D1|TSSK6|CFAP69|BRIP1|TDRD5|RSPH1|TNP1|DPY19L2P1|CCDC42|ADAD1|CFAP44|TBPL1|PIWIL1|RFX2|ROPN1|ACRBP|MEIOC|SUN5|CABYR|SYCP3|CFAP43|EFCAB9|CFTR|MEIG1|SOX30|DNAH1|SYCP1|SLC26A8|FAM9B|DPY19L2|PDILT|TTC21A|CATSPER3|TSSK1B|IQCF1|FAM9C|TOPAZ1|ROPN1B|OSB…	89	1.28116e-36
germ cell development (GO:0007281)	biological_process	P3	CFAP157|CFAP206|DEFB1|BRCA2|ROPN1L|KNL1|CCDC63|ZPBP2|CATSPER2|NME5|FSIP2|TSSK4|RSPH6A|IQCG|TCP11|SPEF2|TXNDC8|TRIP13|HOOK1|CCDC136|TMF1|DAZL|SPO11|CAPZA3|YBX2|DMC1|CFAP97D1|TSSK6|SOHLH2|CFAP69|BRIP1|BNC1|TDRD5|MOV10L1|IHO1|RSPH1|TNP1|DPY19L2P1|CCDC42|ADAD1|GPR149|CFAP44|AURKC|TBPL1|PIWIL1|RFX2|ROPN1|KASH5|ACRBP|MEIOC|SUN5|CABYR|H1-9P|SYCP3|CFAP43|EFCAB9|CFTR|MEIG1|HORMAD1|SOX30|DNAH1|SYCP1|SLC26A…	111	4.50242e-30
cilium organization (GO:0044782)	biological_process	P3	CEP76|CFAP157|CFAP206|CEP63|NPHP4|NPHP1|IFT88|FOXJ1|BBOF1|MCIDAS|EVI5L|CCDC63|POC1B|NME5|CEP250|FSIP2|KIF3B|RSPH6A|CEP152|IQCG|CDK1|CEP164|DNAH8|CFAP46|TUBG1|KIF24|CFAP52|STK36|HOATZ|ODAD3|ARL6|SPEF2|DNAI4|WDR90|PKHD1|CNTRL|DNAL1|CEP162|TEKT1|CFAP221|CCDC96|TTBK2|EHD1|CFAP97D1|ODAD2|CFAP61|CFAP69|CFAP53|LRRC49|ATG3|CEP350|RSPH1|DYNC2I2|FBF1|FUZ|ONECUT1|IQUB|DNAH17|RPGRIP1L|CFAP44|CDC14C|JHY|CCDC8…	156	3.93976e-35
cilium assembly (GO:0060271)	biological_process	P3	CEP76|CFAP157|CFAP206|CEP63|NPHP4|NPHP1|IFT88|FOXJ1|BBOF1|MCIDAS|EVI5L|CCDC63|POC1B|NME5|CEP250|FSIP2|KIF3B|RSPH6A|CEP152|IQCG|CDK1|CEP164|DNAH8|CFAP46|TUBG1|KIF24|CFAP52|STK36|HOATZ|ODAD3|ARL6|SPEF2|DNAI4|WDR90|PKHD1|CNTRL|DNAL1|CEP162|TEKT1|CFAP221|CCDC96|TTBK2|EHD1|CFAP97D1|ODAD2|CFAP69|CFAP53|LRRC49|ATG3|CEP350|RSPH1|DYNC2I2|FBF1|FUZ|ONECUT1|IQUB|DNAH17|RPGRIP1L|CFAP44|CDC14C|JHY|CCDC88A|CFAP…	146	5.27183e-32
plasma membrane bounded cell projection assembly (GO:0120031)	biological_process	P3	CEP76|CFAP157|CFAP206|CEP63|NPHP4|NPHP1|IFT88|FOXJ1|BBOF1|MCIDAS|EVI5L|CCDC63|POC1B|NME5|CEP250|FSIP2|KIF3B|RSPH6A|CEP152|IQCG|CDK1|CEP164|DNAH8|CFAP46|TUBG1|KIF24|CFAP52|STK36|HOATZ|ODAD3|ARL6|SPEF2|DNAI4|WDR90|PKHD1|CNTRL|DNAL1|CEP162|TEKT1|KLHL41|CFAP221|CCDC96|TTBK2|EHD1|CFAP97D1|ODAD2|CFAP69|CFAP53|LRRC49|ATG3|CEP350|RSPH1|DYNC2I2|FBF1|FUZ|ONECUT1|IQUB|DNAH17|RPGRIP1L|CFAP44|CDC14C|JHY|CCDC8…	152	2.75741e-15
cell projection assembly (GO:0030031)	biological_process	P3	CEP76|CFAP157|CFAP206|CEP63|NPHP4|NPHP1|IFT88|FOXJ1|BBOF1|MCIDAS|EVI5L|CCDC63|POC1B|NME5|CEP250|FSIP2|KIF3B|RSPH6A|CEP152|IQCG|CDK1|CEP164|DNAH8|CFAP46|TUBG1|KIF24|CFAP52|STK36|HOATZ|ODAD3|ARL6|SPEF2|DNAI4|WDR90|PKHD1|CNTRL|DNAL1|CEP162|TEKT1|KLHL41|CFAP221|CCDC96|TTBK2|EHD1|CFAP97D1|ODAD2|CFAP69|CFAP53|LRRC49|ATG3|CEP350|RSPH1|DYNC2I2|FBF1|FUZ|ONECUT1|IQUB|DNAH17|RPGRIP1L|CFAP44|CDC14C|JHY|CCDC8…	154	4.81915e-15
fertilization (GO:0009566)	biological_process	P3	STX2|MAEL|SPESP1|PRDM9|NOX5|SLC9B1|SPA17|KCNU1|GLRA1|MST1R|ZPBP2|CATSPER2|ADAM18|PLCZ1|GLIPR1L1|TSSK4|MEIOB|CDK1|DKKL1|AKAP3|C16orf92|CCDC136|TMPRSS12|ADAM21|ZAN|EQTN|CFAP69|ADAM2|TMEM95|SPACA7|PLCD4|TNP1|ADAM20|SPAM1|HOXA11|RIMS1|ACRBP|ADAM30|ADAM32|SLC22A16|OR10J1|CRISP1|SPAG8|ADAM5|TRPC7|SPATA46|CLGN|CCDC87|SPACA3|PKDREJ|ZP1|CATSPER3|FAM170B|TEX101|ATP8B3|IQCF1|TDRD9|SYT6|SMCP|SPAG1|ROPN1B|ATP…	95	2.10866e-31
single fertilization (GO:0007338)	biological_process	P3	STX2|SPESP1|NOX5|SLC9B1|SPA17|KCNU1|GLRA1|MST1R|ZPBP2|CATSPER2|ADAM18|PLCZ1|GLIPR1L1|CDK1|DKKL1|AKAP3|C16orf92|CCDC136|TMPRSS12|ADAM21|ZAN|EQTN|ADAM2|TMEM95|SPACA7|PLCD4|TNP1|ADAM20|SPAM1|HOXA11|RIMS1|ADAM30|ADAM32|SLC22A16|OR10J1|CRISP1|SPAG8|ADAM5|TRPC7|SPATA46|CLGN|CCDC87|SPACA3|PKDREJ|ZP1|CATSPER3|FAM170B|TEX101|ATP8B3|IQCF1|SYT6|SMCP|SPAG1|ROPN1B|CATSPER4|ACR|DAZ2|ASTL|PRSS37|TNP2|KDM5B|HVCN…	80	9.31608e-27
axoneme assembly (GO:0035082)	biological_process	P3	CFAP157|CFAP206|FOXJ1|CCDC63|FSIP2|RSPH6A|IQCG|DNAH8|CFAP46|HOATZ|ODAD3|SPEF2|DNAI4|DNAL1|CFAP97D1|ODAD2|CFAP69|LRRC49|RSPH1|DNAH17|CFAP44|JHY|CFAP74|RSPH9|ZMYND10|CCDC40|CFAP100|RSPH4A|HYDIN|CFAP43|MEIG1|DNAI2|DNAH1|DNAAF4|ODAD1|CCDC65|DNAH7|SPEF1|SPAG1|RP1|SPAG17|TEKT2|ARMC2|CFAP65|DNAAF6|DNAAF11|DNAI1|DRC1|TTC12|DNAI3|DNAJB13|DNAAF3|DNAAF1|DAW1	54	1.54598e-28
microtubule bundle formation (GO:0001578)	biological_process	P3	CFAP157|CFAP206|FOXJ1|CCDC63|KIF20A|FSIP2|RSPH6A|IQCG|DNAH8|CFAP46|HOATZ|ODAD3|SPEF2|DNAI4|PRC1|DNAL1|CFAP97D1|ODAD2|CFAP69|LRRC49|RSPH1|DNAH17|CFAP44|JHY|CFAP74|RSPH9|ZMYND10|CCDC40|CFAP100|RSPH4A|HYDIN|CFAP43|MEIG1|DNAI2|DNAH1|DNAAF4|ODAD1|CCDC65|DNAH7|SPEF1|SPAG1|RP1|SPAG17|PLK1|TEKT2|ARMC2|CFAP65|DNAAF6|DNAAF11|DNAI1|DRC1|TRIM46|TTLL6|TTC12|DNAI3|DNAJB13|DNAAF3|DNAAF1|DAW1	59	1.05712e-22
ciliary basal body-plasma membrane docking (GO:0097711)	biological_process	P3	CEP76|CEP63|NPHP4|NPHP1|CEP250|CEP152|CDK1|CEP164|TUBG1|KIF24|CNTRL|CEP162|TTBK2|FBF1|RPGRIP1L|B9D1|NEK2|CCP110|CEP43|RAB3IP|CENPJ|PLK1|CEP70|CEP135|PCM1|ODF2|TMEM67|TUBA4A	28	0.00376848
centriole replication (GO:0007099)	biological_process	P3	CEP76|CEP63|C10orf90|POC1B|CEP152|BRCA1|CETN1|CCP110|CNTROB|PLK2|CEP295NL|CENPJ|STIL|CEP135|DEUP1|WDR62|MDM1	17	0.00119145
centriole assembly (GO:0098534)	biological_process	P3	CEP76|CEP63|C10orf90|MCIDAS|POC1B|CEP152|BRCA1|CETN1|CCP110|CNTROB|PLK2|CEP295NL|CENPJ|STIL|CEP135|CCDC61|DEUP1|WDR62|MDM1	19	0.000284438
mitotic spindle midzone assembly (GO:0051256)	biological_process	P3	RACGAP1|PRC1|KIF4B|KIF23|AURKC|KIF4A	6	0.0151026
mitotic spindle elongation (GO:0000022)	biological_process	P3	RACGAP1|PRC1|KIF4B|KIF23|AURKC|KIF4A	6	0.0326772
spindle elongation (GO:0051231)	biological_process	P3	RACGAP1|PRC1|KIF4B|KIF23|AURKC|KIF4A	6	0.0326772
microtubule-based protein transport (GO:0099118)	biological_process	P3	IFT88|KIF3B|DYNC2I2|RAB27B|TTC30A|IFT57|IFT122|MAK|TTC21A|BBS12|IFT74|LCA5L|IFT81|IFT22|IFT172|KIF17|DYNLRB2|DYNC2I1|SSX2IP|PCM1|RPGR	21	0.0154919
protein transport along microtubule (GO:0098840)	biological_process	P3	IFT88|KIF3B|DYNC2I2|RAB27B|TTC30A|IFT57|IFT122|MAK|TTC21A|BBS12|IFT74|LCA5L|IFT81|IFT22|IFT172|KIF17|DYNLRB2|DYNC2I1|SSX2IP|PCM1|RPGR	21	0.0154919
male meiosis I (GO:0007141)	biological_process	P3	BRCA2|BRDT|MEIOB|TRIP13|SPO11|DMC1|MOV10L1|SLC2A8|MEIOC|SYCP3|MYBL1|HSF2BP|TDRD9|DDX4|REC8|HSPA2|CCNA1	17	1.4421e-08
intraciliary transport involved in cilium assembly (GO:0035735)	biological_process	P3	IFT88|KIF3B|DYNC2I2|IFT57|IFT122|IFT74|IFT81|IFT22|IFT172|KIF17|DYNLRB2|DYNC2I1|SSX2IP|PCM1	14	0.0386647
fusion of sperm to egg plasma membrane involved in single fertilization (GO:0007342)	biological_process	P3	SPESP1|NOX5|C16orf92|EQTN|ADAM2|TMEM95|SPAM1|CRISP1|SPATA46|SPACA3|ROPN1B|IZUMO1|FOLR3|LYZL4	14	5.39651e-06
plasma membrane fusion (GO:0045026)	biological_process	P3	SPESP1|NOX5|C16orf92|EQTN|ADAM2|TMEM95|SPAM1|CRISP1|SPATA46|SPACA3|ROPN1B|IZUMO1|FOLR3|LYZL4	14	0.000111379
regulation of cilium movement (GO:0003352)	biological_process	P3	CFAP206|DEFB1|DNAH11|ODAD2|CFAP69|CCDC40|CFAP43|CCDC65|TAC4|TEX101|IQCF1|DRC1|TTLL6|CATSPER1|TPPP2|DNAAF1	16	0.0002057
epithelial cilium movement involved in extracellular fluid movement (GO:0003351)	biological_process	P3	ROPN1L|SPA17|NME5|STK36|SPEF2|ADCY10|CFAP53|JHY|CCDC40|CABYR|CFAP43|DNAAF4|KIF27|NEK10|SPAG17|DPCD|DNAAF11|DNAAF1|DAW1	19	1.48867e-07
extracellular transport (GO:0006858)	biological_process	P3	ROPN1L|SPA17|NME5|STK36|SPEF2|ADCY10|CFAP53|JHY|CCDC40|CABYR|CFAP43|DNAAF4|KIF27|NEK10|SPAG17|DPCD|DNAAF11|DNAAF1|DAW1	19	1.2329e-06
regulation of microtubule-based movement (GO:0060632)	biological_process	P3	CFAP206|DEFB1|DNAH11|ODAD2|CNIH2|CFAP69|CCDC40|CFAP43|CCDC65|TAC4|TEX101|IQCF1|DRC1|TRIM46|TTLL6|CATSPER1|TPPP2|DNAAF1	18	0.00302614
detection of light stimulus (GO:0009583)	biological_process	P3	GNAT1|GUCY2D|PDE6A|CEP250|GRK7|GUCY2F|ATP8A2|OPN5|RGS9BP|CAMKMT|RPE65|RGR|RP1|RRH|PPEF1|ABCA4|GRK4|GUCA1A|CRB1|CNGB1|SAG|PDC	22	0.0160107
intraciliary transport (GO:0042073)	biological_process	P3	IFT88|KIF3B|DYNC2I2|TTC30A|IFT57|IFT122|MAK|TTC21A|BBS12|IFT74|LCA5L|IFT81|IFT22|IFT172|KIF17|DYNLRB2|DYNC2I1|SSX2IP|PCM1|RPGR	20	0.00109156
photoreceptor cell maintenance (GO:0045494)	biological_process	P3	NPHP4|SPATA7|PCDH15|USH2A|MAK|BBS12|RP1|ABCA4|CRB1|CLRN1|USH1C|PROM1|CNGB1|MDM1|USH1G	15	0.034458
axonemal dynein complex assembly (GO:0070286)	biological_process	P3	CCDC63|DNAH8|ODAD3|DNAI4|DNAL1|ODAD2|LRRC49|DNAH17|ZMYND10|CCDC40|CFAP100|DNAI2|DNAH1|DNAAF4|ODAD1|CCDC65|DNAH7|SPAG1|TEKT2|DNAAF6|DNAAF11|DNAI1|DRC1|TTC12|DNAI3|DNAAF3|DNAAF1|DAW1	28	5.06951e-17
outer dynein arm assembly (GO:0036158)	biological_process	P3	CCDC63|DNAH8|ODAD3|DNAL1|ODAD2|LRRC49|DNAH17|ZMYND10|DNAI2|DNAAF4|ODAD1|DNAAF6|DNAAF11|DNAI1|DNAAF1|DAW1	16	2.44003e-08
acrosome assembly (GO:0001675)	biological_process	P3	KNL1|ZPBP2|TXNDC8|CCDC136|TMF1|TBPL1|RFX2|ACRBP|SOX30|SPACA1|SPINK2|ZPBP|FABP9	13	3.70944e-07
acrosome reaction (GO:0007340)	biological_process	P3	STX2|SPESP1|GLRA1|AKAP3|EQTN|PLCD4|RIMS1|CCDC87|PKDREJ|FAM170B|IQCF1|SYT6|ROPN1B|ACR|PRSS37|TNP2|PCSK4|IFTAP|POMZP3|TRIM36	20	1.9006e-06
sperm axoneme assembly (GO:0007288)	biological_process	P3	CFAP157|CFAP206|FSIP2|IQCG|SPEF2|CFAP97D1|CFAP69|CFAP44|CFAP43|MEIG1|DNAH1|ARMC2|CFAP65|TTC12	14	1.28353e-05
sperm capacitation (GO:0048240)	biological_process	P3	DEFB1|ROPN1L|CATSPER2|TCP11|ROPN1|CABYR|EFCAB9|CFTR|SLC26A8|CATSPER3|IQCF1|ROPN1B|CATSPER4|PCSK4|CATSPERD	15	9.6838e-05
microtubule-based transport (GO:0099111)	biological_process	P3	IFT88|ROPN1L|SPA17|NME5|KIF3B|STK36|SPEF2|MAPT|CNIH2|ADCY10|AP3B2|CFAP53|DYNC2I2|TMEM108|WASF1|RAB27B|JHY|CCDC40|TTC30A|IFT57|CABYR|CFAP43|IFT122|MAK|DNAAF4|TTC21A|BBS12|IFT74|LCA5L|KIF27|BICDL1|IFT81|IFT22|NEK10|AGBL4|PRKCZ|SPAG17|IFT172|DPCD|DNAAF11|KIF17|TRIM46|DYNLRB2|DYNC2I1|SSX2IP|PCM1|RPGR|DNAAF1|DAW1|KIF4A	50	0.00011069
meiosis II (GO:0007135)	biological_process	P3	MEIKIN|HORMAD2|BUB1B|SGO2|HORMAD1|REC8|SGO1|BUB1	8	0.000146415
meiosis II cell cycle process (GO:0061983)	biological_process	P3	MEIKIN|HORMAD2|BUB1B|SGO2|HORMAD1|REC8|SGO1|BUB1	8	0.000146415
meiotic sister chromatid cohesion (GO:0051177)	biological_process	P3	MEIKIN|HORMAD2|BUB1B|SGO2|HORMAD1|REC8|SGO1|BUB1	8	0.000146415
meiotic sister chromatid segregation (GO:0045144)	biological_process	P3	MEIKIN|HORMAD2|BUB1B|SGO2|HORMAD1|REC8|SGO1|BUB1	8	0.000146415
sperm chromatin condensation (GO:0035092)	biological_process	P3	TSSK6|TNP1|PIWIL1|SYCP3|SYCP1|H2BC1|TNP2|H1-7|CHD5	9	0.000337999
piRNA metabolic process (GO:0034587)	biological_process	P3	MAEL|MOV10L1|EXD1|PIWIL1|MYBL1|GPAT2|FKBP6|TDRD9|DDX4|TDRD1|ASZ1	11	0.000501139
peptidyl-glutamic acid modification (GO:0018200)	biological_process	P3	AGBL2|TTLL8|AGBL5|FOLH1B|TTLL2|TTLL10|TPGS2|TTLL9|TTLL11|TTLL5|AGBL4|AGTPBP1|TTLL6|AGBL3	14	0.000930632
spermatid nucleus differentiation (GO:0007289)	biological_process	P3	TMF1|TSSK6|TNP1|TBPL1|PIWIL1|SYCP3|SYCP1|H2BC1|TNP2|H1-7|CHD5	11	0.000992015
microtubule organizing center organization (GO:0031023)	biological_process	P3	CEP76|CEP63|C10orf90|FOXJ1|BRCA2|MCIDAS|POC1B|CEP250|KIF3B|CEP152|CDK1|PKHD1|BRCA1|CETN3|CETN1|HEPACAM2|NEK2|CCP110|CNTROB|PLK2|XRCC2|CEP295NL|PARD6A|CENPJ|STIL|PLK1|CEP135|CCDC61|SGO1|DEUP1|FBXW5|NDC80|SSX2IP|PCM1|ODF2|WDR62|MDM1|TMEM67	38	0.00141954
secretory granule organization (GO:0033363)	biological_process	P3	KNL1|ZPBP2|TXNDC8|CCDC136|TMF1|TBPL1|RFX2|ACRBP|SOX30|BAIAP3|SRGN|SPACA1|SPINK2|ZPBP|FABP9	15	0.00232786
meiotic chromosome separation (GO:0051307)	biological_process	P3	MEIOB|ESPL1|FANCM|HFM1|M1AP|SLX4|EME1|MOS|TTK|TOP2A|MSH4|TEX11	12	0.00398422
detection of visible light (GO:0009584)	biological_process	P3	GNAT1|GUCY2D|PDE6A|CEP250|GRK7|GUCY2F|ATP8A2|OPN5|RGS9BP|CAMKMT|RPE65|RGR|RP1|RRH|PPEF1|ABCA4|GRK4|GUCA1A|CRB1|CNGB1|SAG	21	0.00491052
DNA methylation involved in gamete generation (GO:0043046)	biological_process	P3	MAEL|CTCFL|TDRD5|MOV10L1|FKBP6|MORC1|TDRD9|DDX4|TDRD1|ASZ1	10	0.00654235
positive regulation of meiotic cell cycle (GO:0051446)	biological_process	P3	PRDM9|OVOL1|RAD51AP1|OOEP|MEIOC|CDC25C|MEIOSIN|TOPAZ1|CDC25A|NPM2|PRDM7	11	0.00835956
positive regulation of reproductive process (GO:2000243)	biological_process	P3	PRDM9|DEFB1|GLRA1|VIP|OVOL1|CFAP69|BNC1|ANKRD31|RAD51AP1|OOEP|MEIOC|CDC25C|SHH|CCDC87|MEIOSIN|FAM170B|TAC4|IQCF1|TOPAZ1|PRSS37|POMZP3|CDC25A|NPM2|PRDM7	24	0.00916336
retina homeostasis (GO:0001895)	biological_process	P3	NPHP4|POC1B|SPATA7|PCDH15|SLC28A2|USH2A|POTEI|POTEE|ARMS2|MAK|RPE65|BBS12|RP1|POTEJ|ABCA4|POTEF|CRB1|ZG16B|CLRN1|USH1C|PROM1|CNGB1|MDM1|USH1G	24	0.00916336
centrosome duplication (GO:0051298)	biological_process	P3	CEP76|CEP63|C10orf90|BRCA2|POC1B|CEP152|PKHD1|BRCA1|CETN1|CCP110|CNTROB|PLK2|CEP295NL|CENPJ|STIL|CEP135|DEUP1|FBXW5|NDC80|WDR62|MDM1|TMEM67	22	0.0132807
cytokinesis (GO:0000910)	biological_process	P3	RACGAP1|CEP55|DRD2|NOX5|BRCA2|KIF20A|KIF3B|ESPL1|KIF14|AHCTF1|PRC1|KIF4B|KIF23|SEPTIN3|CENPA|SHCBP1L|SPIRE1|GIT1|CDC14C|AURKC|SEPTIN4|DRD3|E2F8|TEX14|CDC14A|CCP110|CNTROB|SEPTIN12|KIF20B|PLK2|EFHC1|EFHC2|ROPN1B|PLK1|CIT|DCDC1|CDC6|TRIM36|KIF4A|CUL3	40	0.018939
phototransduction, visible light (GO:0007603)	biological_process	P3	GNAT1|GUCY2D|PDE6A|GRK7|GUCY2F|CAMKMT|RP1|PPEF1|ABCA4|GRK4|GUCA1A|CNGB1|SAG	13	0.0270406
regulation of rhodopsin mediated signaling pathway (GO:0022400)	biological_process	P3	GNAT1|GUCY2D|PDE6A|GRK7|GUCY2F|CAMKMT|PPEF1|GRK4|GUCA1A|CNGB1|SAG	11	0.0279911
regulation of meiotic nuclear division (GO:0040020)	biological_process	P3	PRDM9|TRIP13|PSMA8|RAD51AP1|OOEP|HORMAD1|MEIOSIN|CDC20|MOS|FBXO43|NPM2|PRDM7	12	0.0351107
regulation of cytokinesis (GO:0032465)	biological_process	P3	RACGAP1|DRD2|BRCA2|KIF20A|KIF3B|KIF14|AHCTF1|PRC1|KIF23|GIT1|CDC14C|AURKC|DRD3|E2F8|TEX14|CDC14A|CCP110|KIF20B|PLK2|PLK1|CIT|DCDC1|CDC6|CUL3	24	0.0351191
non-motile cilium assembly (GO:1905515)	biological_process	P3	IFT88|CEP250|CEP350|FUZ|RPGRIP1L|IFT57|CCDC13|CEP126|IFT122|MAK|IFT74|RP1|IFT172|CEP135|ARL13A|PCM1|RPGRIP1	17	0.040455
spermatogenesis, exchange of chromosomal proteins (GO:0035093)	biological_process	P3	TNP1|PIWIL1|SYCP3|H2BC1|TNP2|CHD5	6	0.0151026
inner dynein arm assembly (GO:0036159)	biological_process	P3	ZMYND10|CCDC40|CFAP100|DNAH1|DNAAF4|DNAH7|TEKT2|DNAAF6|DNAAF11|DNAI3|DNAAF1	11	3.8948e-05
left/right pattern formation (GO:0060972)	biological_process	P3	FOXJ1|IFT57|MNS1|IFT172|DPCD|PKD1L1|PITX2|DNAAF1|PIFO	9	0.0334269
regulation of cilium beat frequency (GO:0003356)	biological_process	P3	CFAP206|DNAH11|ODAD2|CCDC40|CFAP43|CATSPER1|DNAAF1	7	0.0326772
motile cilium assembly (GO:0044458)	biological_process	P3	FOXJ1|BBOF1|MCIDAS|RSPH6A|CFAP221|JHY|RSPH9|ZMYND10|CCDC40|SPATA6|IFT57|CFAP43|DNAAF11|DNAAF3|DNAAF1	15	1.12069e-06
determination of bilateral symmetry (GO:0009855)	biological_process	P3	FOXJ1|DNAH11|KIF3B|ODAD3|ARL6|ENKUR|ODAD2|CFAP53|OVOL2|NODAL|RPGRIP1L|CCDC40|WNT8B|FOXH1|IFT57|SHH|DNAI2|DNAAF4|TBX1|IFT74|NKX3-2|IFT172|STIL|DPCD|PKD1L1|ALDH1A2|DNAAF11|DNAI1|FOXN4|DRC1|PITX2|TBR1|DNAAF1|DAW1|FGF8	35	0.00128121
specification of symmetry (GO:0009799)	biological_process	P3	FOXJ1|DNAH11|KIF3B|ODAD3|ARL6|ENKUR|ODAD2|CFAP53|OVOL2|NODAL|RPGRIP1L|CCDC40|WNT8B|FOXH1|IFT57|SHH|DNAI2|DNAAF4|TBX1|IFT74|NKX3-2|IFT172|STIL|DPCD|PKD1L1|ALDH1A2|DNAAF11|DNAI1|FOXN4|DRC1|PITX2|TBR1|DNAAF1|DAW1|FGF8	35	0.00148054
regulation of cyclin-dependent protein kinase activity (GO:1904029)	biological_process	P3	CDK5R2|CCNE1|STOX1|CCNA2|CDKN2D|CCNE2|LATS2|CDK7|RGCC|PKMYT1|CCNB3|BLM|CDKN2A|CDKN3|CDC25C|TTBK1|CCNO|CDKN2B|CCNYL3|INCA1|IPO5|PLK1|PROX1|CDC6|CDC25A|SPDYA|CCNYL2|CCNA1|CCNH|CCNB2	30	0.0021803
determination of left/right symmetry (GO:0007368)	biological_process	P3	FOXJ1|DNAH11|KIF3B|ODAD3|ARL6|ENKUR|ODAD2|CFAP53|OVOL2|NODAL|RPGRIP1L|CCDC40|FOXH1|IFT57|SHH|DNAI2|DNAAF4|TBX1|IFT74|NKX3-2|IFT172|STIL|DPCD|PKD1L1|DNAAF11|DNAI1|FOXN4|DRC1|PITX2|TBR1|DNAAF1|DAW1|FGF8	33	0.00218423
centrosome cycle (GO:0007098)	biological_process	P3	CEP76|CEP63|C10orf90|BRCA2|POC1B|CEP250|KIF3B|CEP152|CDK1|PKHD1|BRCA1|CETN3|CETN1|HEPACAM2|NEK2|CCP110|CNTROB|PLK2|XRCC2|CEP295NL|PARD6A|CENPJ|STIL|PLK1|CEP135|SGO1|DEUP1|FBXW5|NDC80|SSX2IP|PCM1|ODF2|WDR62|MDM1|TMEM67	35	0.00297723
protein deglutamylation (GO:0035608)	biological_process	P3	AGBL2|AGBL5|FOLH1B|AGBL4|AGTPBP1|AGBL3	6	0.0047468
axonemal central apparatus assembly (GO:1904158)	biological_process	P3	RSPH9|HYDIN|SPEF1|SPAG17|DNAJB13	5	0.00563054
regulation of cyclin-dependent protein serine/threonine kinase activity (GO:0000079)	biological_process	P3	CDK5R2|CCNE1|CCNA2|CDKN2D|CCNE2|LATS2|CDK7|RGCC|PKMYT1|CCNB3|BLM|CDKN2A|CDKN3|CDC25C|CCNO|CDKN2B|CCNYL3|INCA1|IPO5|PLK1|PROX1|CDC6|CDC25A|SPDYA|CCNYL2|CCNA1|CCNH|CCNB2	28	0.00654235
detection of external stimulus (GO:0009581)	biological_process	P3	GNAT1|GUCY2D|PDE6A|CEP250|GRK7|GUCY2F|ATP8A2|PKD2L2|STRC|TRPM8|SCN1A|OPN5|RGS9BP|COL11A1|TMC1|CAMKMT|PKDREJ|RPE65|TMC2|RGR|RP1|RRH|PPEF1|ABCA4|PKD1L1|GRK4|GUCA1A|CRB1|PJVK|PKD2L1|CNGB1|ANO1|SAG|PDC	34	0.0216891
detection of abiotic stimulus (GO:0009582)	biological_process	P3	GNAT1|GUCY2D|PDE6A|CEP250|GRK7|GUCY2F|ATP8A2|PKD2L2|STRC|TRPM8|SCN1A|OPN5|RGS9BP|COL11A1|TMC1|CAMKMT|PKDREJ|RPE65|TMC2|RGR|RP1|RRH|PPEF1|ABCA4|PKD1L1|GRK4|GUCA1A|CRB1|PJVK|PKD2L1|CNGB1|ANO1|SAG|PDC	34	0.0317754
meiotic DNA double-strand break processing (GO:0000706)	biological_process	P3	SPO11|BRIP1|SLX4|C14orf39	4	0.0326772
protein side chain deglutamylation (GO:0035610)	biological_process	P3	AGBL2|AGBL4|AGTPBP1|AGBL3	4	0.0326772
nuclear division (GO:0000280)	biological_process	P3	MAEL|RACGAP1|SMC1B|PRDM9|PTTG1|KNSTRN|MEIKIN|NCAPG2|CCNE1|BRCA2|TEX19|BRDT|KIF3B|MEIOB|SYCE1|ESPL1|LPIN1|CDK1|TUBG1|C11orf80|CCNE2|KIF14|FANCM|PRC1|TRIP13|HORMAD2|KIF4B|SPATA22|RGCC|KIF23|CENPE|SHCBP1L|SPO11|DMC1|SPIRE1|HASPIN|CDCA8|BRIP1|MOV10L1|SYCP2L|IHO1|KNTC1|TERB2|SLC2A8|C1orf146|NUF2|RNF212B|MKI67|MEI1|CDC14C|DSN1|ANKRD31|MND1|RAD54L|BUB1B|AURKC|PSMA8|KIF18A|SGO2|PKMYT1|DRD3|RAD51AP1|KASH5…	142	1.51668e-23
organelle fission (GO:0048285)	biological_process	P3	MAEL|RACGAP1|SMC1B|PRDM9|PTTG1|KNSTRN|MEIKIN|NCAPG2|CCNE1|BRCA2|TEX19|BRDT|KIF3B|MEIOB|SYCE1|ESPL1|LPIN1|CDK1|TUBG1|C11orf80|CCNE2|KIF14|MAPT|FANCM|PRC1|TRIP13|HORMAD2|KIF4B|SPATA22|RGCC|KIF23|CENPE|SHCBP1L|SPO11|DMC1|SPIRE1|HASPIN|CDCA8|BRIP1|MTFR2|MOV10L1|SYCP2L|IHO1|KNTC1|TERB2|SLC2A8|C1orf146|NUF2|RNF212B|MKI67|PEX11G|MEI1|CDC14C|DSN1|ANKRD31|MND1|RAD54L|BUB1B|AURKC|PSMA8|KIF18A|SGO2|PKMYT1|D…	150	2.25412e-22
nuclear chromosome segregation (GO:0098813)	biological_process	P3	MAEL|RACGAP1|SMC1B|PRDM9|PTTG1|KNSTRN|MEIKIN|NCAPG2|CCNE1|KNL1|MEIOB|SYCE1|ESPL1|TUBG1|CCNE2|KIF14|FANCM|PRC1|TRIP13|HORMAD2|KIF4B|SPATA22|KIF23|CENPE|SPO11|DMC1|HASPIN|CDCA8|BRIP1|IHO1|KNTC1|TERB2|C1orf146|NUF2|ESCO2|RNF212B|DSN1|ANKRD31|BUB1B|AURKC|KIF18A|SGO2|KASH5|TEX14|MEIOC|TEX15|SPDL1|HFM1|TEX12|M1AP|NCAPG|HORMAD1|USP44|NCAPH|NEK2|SLX4|SYCP1|CDC20|EME1|DLGAP5|MOS|TTK|KIF2B|KATNB1|C14orf39|…	92	4.89849e-16
chromosome segregation (GO:0007059)	biological_process	P3	MAEL|RACGAP1|HJURP|SMC1B|PRDM9|PTTG1|KNSTRN|MEIKIN|NCAPG2|CCNE1|KNL1|CDCA2|MEIOB|SYCE1|ESPL1|TUBG1|CCNE2|KIF14|BRCA1|FANCM|PRC1|TRIP13|HORMAD2|KIF4B|SPATA22|KIF23|CENPE|SPO11|DMC1|HASPIN|CDCA8|BRIP1|IHO1|KNTC1|TERB2|C1orf146|NUF2|ESCO2|RNF212B|MKI67|DSN1|ANKRD31|BUB1B|AURKC|KIF18A|SGO2|OIP5|KASH5|TEX14|MEIOC|TEX15|SPDL1|HFM1|CENPW|TEX12|M1AP|NCAPG|HORMAD1|USP44|NCAPH|NEK2|SLX4|SYCP1|NEK11|CDC20|E…	102	2.78366e-14
microtubule cytoskeleton organization (GO:0000226)	biological_process	P3	CEP76|RACGAP1|CFAP157|CFAP206|CEP63|C10orf90|KNSTRN|FOXJ1|BRCA2|MCIDAS|INSC|CCDC63|POC1B|KIF20A|CEP250|FSIP2|KIF3B|RSPH6A|CEP152|ESPL1|IQCG|CDK1|DNAH8|CFAP46|TUBG1|KIF24|HOATZ|ODAD3|SPEF2|DNAI4|PKHD1|MAPT|BRCA1|PRC1|KIF4B|HOOK1|DNAL1|KIF23|CENPE|CETN3|CENPA|TTLL2|SPATA7|TTBK2|CFAP97D1|SPIRE1|WEE1|ODAD2|CETN1|CFAP69|LRRC49|ULK4|CEP350|RSPH1|NUF2|DNAH17|TUBB8B|CFAP44|CDC14C|JHY|CCDC88A|AURKC|KIF18A…	170	2.04596e-22
organelle assembly (GO:0070925)	biological_process	P3	CEP76|RACGAP1|CFAP157|CFAP206|CEP63|C10orf90|NPHP4|NPHP1|IFT88|FOXJ1|BBOF1|MCIDAS|KNL1|LCP1|EVI5L|CCDC63|ZPBP2|TBC1D12|POC1B|NME5|CEP250|FSIP2|KIF3B|RSPH6A|CEP152|IQCG|CDK1|CEP164|DNAH8|CFAP46|TUBG1|KIF24|CFAP52|STK36|HOATZ|ODAD3|ARL6|SPEF2|DNAI4|WDR90|PKHD1|MAPT|BRCA1|TXNDC8|PRC1|KIF4B|CNTRL|DNAL1|KIF23|CENPE|RPL10|CCDC136|TMF1|CENPA|CEP162|TEKT1|KLHL41|CFAP221|CCDC96|TTBK2|EHD1|CFAP97D1|ODAD2|C…	218	1.08643e-19
sperm-egg recognition (GO:0035036)	biological_process	P3	SPESP1|SPA17|KCNU1|ZPBP2|CATSPER2|ADAM18|TMPRSS12|ADAM21|ZAN|ADAM2|ADAM20|SPAM1|ADAM30|ADAM32|CRISP1|ADAM5|CLGN|SPACA3|ZP1|CATSPER3|TEX101|ATP8B3|CATSPER4|ACR|ASTL|PRSS37|HVCN1|PCSK4|GLIPR1L2|POMZP3|FETUB|IZUMO1|FOLR3|OVGP1|CATSPER1|ZPBP|CATSPERD|CATSPERG|PRSS55|CATSPERB	40	1.53844e-18
cell-cell recognition (GO:0009988)	biological_process	P3	SPESP1|SPA17|KCNU1|ZPBP2|CATSPER2|ADAM18|FUT3|TMPRSS12|ADAM21|ZAN|ADAM2|ADAM20|SPAM1|ADAM30|ADAM32|CRISP1|ADAM5|CLGN|SPACA3|ZP1|CATSPER3|TEX101|ATP8B3|CATSPER4|ACR|ASTL|PRSS37|HVCN1|PCSK4|GLIPR1L2|POMZP3|FETUB|IZUMO1|FOLR3|OVGP1|CATSPER1|ZPBP|CATSPERD|CATSPERG|PRSS55|CATSPERB	41	7.30442e-14
binding of sperm to zona pellucida (GO:0007339)	biological_process	P3	SPA17|ZPBP2|ADAM18|TMPRSS12|ADAM21|ZAN|ADAM2|ADAM20|SPAM1|ADAM30|ADAM32|CRISP1|ADAM5|CLGN|ZP1|TEX101|ATP8B3|ACR|ASTL|PRSS37|PCSK4|GLIPR1L2|POMZP3|FETUB|OVGP1|ZPBP|PRSS55	27	3.84998e-11
cell recognition (GO:0008037)	biological_process	P3	SPESP1|DSCAM|SPA17|KCNU1|FOXG1|ZPBP2|CATSPER2|ADAM18|FUT3|IGLL1|TMPRSS12|ADAM21|ZAN|ADAM2|CNTN6|ADAM20|SPAM1|ADAM30|ADAM32|CRISP1|ADAM5|CLGN|SPACA3|CNTN4|ZP1|CATSPER3|TEX101|ATP8B3|CATSPER4|ACR|ASTL|PRSS37|HVCN1|PCSK4|GLIPR1L2|POMZP3|FETUB|IGSF9|IZUMO1|FOLR3|OVGP1|CATSPER1|ZPBP|CATSPERD|CATSPERG|PRSS55|CATSPERB|CNTN2	48	0.0202124
mitotic cell cycle checkpoint (GO:0007093)	biological_process	P3	STK33|GTSE1|GML|CDK1|MUC1|BRCA1|TRIP13|RGCC|TICRR|TOPBP1|CLSPN|WEE1|RAD17|ZWILCH|KNTC1|BUB1B|E2F8|BLM|TEX14|SPDL1|CDC25C|DONSON|USP44|NABP1|RAD9B|PLK2|NEK11|CDC20|EME1|TTK|PLK1|CDC6|FANCD2|HMGA2|NDC80|BUB1|ZWINT	37	0.0342306
meiotic cell cycle phase transition (GO:0044771)	biological_process	P3	OVOL1|CDC25C|TOPAZ1|MOS|TTK|CDC25A|CCNB2	7	0.00791169
chromosome separation (GO:0051304)	biological_process	P3	PTTG1|MEIOB|ESPL1|FANCM|TRIP13|CENPE|KNTC1|BUB1B|TEX14|SPDL1|HFM1|M1AP|USP44|SLX4|CDC20|EME1|DLGAP5|MOS|TTK|PLK1|UBE2DNL|TOP2A|MSH4|CDC6|TACC3|NDC80|TEX11|BUB1|ZWINT|CUL3	30	0.000513198
sister chromatid segregation (GO:0000819)	biological_process	P3	RACGAP1|SMC1B|PTTG1|KNSTRN|MEIKIN|NCAPG2|ESPL1|TUBG1|KIF14|PRC1|TRIP13|HORMAD2|KIF4B|KIF23|CENPE|HASPIN|CDCA8|KNTC1|NUF2|ESCO2|DSN1|BUB1B|AURKC|KIF18A|SGO2|TEX14|SPDL1|NCAPG|HORMAD1|USP44|NCAPH|NEK2|CDC20|DLGAP5|MOS|TTK|KATNB1|PLK1|UBE2DNL|TOP2A|REC8|CDC6|CENPK|SGO1|RAD21L1|TACC3|STAG3|NDC80|BUB1|SPAG5|ZWINT|KIF2C|KIF4A|CUL3	54	2.07537e-05
regulation of mitotic nuclear division (GO:0007088)	biological_process	P3	ESPL1|TRIP13|RGCC|KNTC1|MKI67|BUB1B|PKMYT1|DRD3|TEX14|SPDL1|CDC25C|USP44|NEK2|KIF20B|CDC20|DLGAP5|TTK|PLK1|FBXO43|AURKAIP1|RCC1|FBXW5|NDC80|BUB1|ZWINT|IL1B|FGF8|CUL3	28	0.0351191
meiotic sister chromatid cohesion, centromeric (GO:0051754)	biological_process	P3	MEIKIN|BUB1B|SGO2|BUB1	4	0.0326772
mitotic nuclear division (GO:0140014)	biological_process	P3	RACGAP1|SMC1B|PTTG1|KNSTRN|NCAPG2|KIF3B|ESPL1|LPIN1|CDK1|TUBG1|KIF14|PRC1|TRIP13|KIF4B|RGCC|KIF23|CENPE|HASPIN|CDCA8|KNTC1|NUF2|MKI67|CDC14C|DSN1|BUB1B|AURKC|KIF18A|SGO2|PKMYT1|DRD3|TEX14|CDC14A|DRG1|SPDL1|CDC25C|NCAPG|USP44|NCAPH|NEK2|KIF20B|CDC20|DLGAP5|TTK|KATNB1|PLK1|UBE2DNL|FBXO43|REC8|ANKLE2|CDC6|CENPK|CCDC61|AURKAIP1|RCC1|SGO1|RAD21L1|TACC3|NPM2|FBXW5|NDC80|BUB1|SPAG5|ZWINT|TOGARAM2|IL1B|F…	70	0.000126239
regulation of meiotic cell cycle (GO:0051445)	biological_process	P3	PRDM9|TRIP13|SPATA22|OVOL1|PSMA8|RAD51AP1|OOEP|MEIOC|CDC25C|HORMAD1|MEIOSIN|CDC20|TOPAZ1|MOS|TTK|FBXO43|CDC25A|NPM2|PRDM7	19	0.000584315
regulation of nuclear division (GO:0051783)	biological_process	P3	PRDM9|ESPL1|TRIP13|RGCC|KNTC1|MKI67|BUB1B|PSMA8|PKMYT1|DRD3|RAD51AP1|TEX14|OOEP|SPDL1|CDC25C|HORMAD1|USP44|NEK2|KIF20B|MEIOSIN|CDC20|DLGAP5|MOS|TTK|PLK1|FBXO43|AURKAIP1|RCC1|NPM2|FBXW5|NDC80|BUB1|PRDM7|ZWINT|IL1B|FGF8|CUL3	37	0.00144241
regulation of mitotic sister chromatid separation (GO:0010965)	biological_process	P3	PTTG1|ESPL1|TRIP13|CENPE|KNTC1|BUB1B|TEX14|SPDL1|USP44|CDC20|DLGAP5|TTK|PLK1|UBE2DNL|CDC6|TACC3|NDC80|BUB1|ZWINT|CUL3	20	0.0181687
mitotic sister chromatid separation (GO:0051306)	biological_process	P3	PTTG1|ESPL1|TRIP13|CENPE|KNTC1|BUB1B|TEX14|SPDL1|USP44|CDC20|DLGAP5|TTK|PLK1|UBE2DNL|CDC6|TACC3|NDC80|BUB1|ZWINT|CUL3	20	0.0274789
mitotic sister chromatid segregation (GO:0000070)	biological_process	P3	RACGAP1|SMC1B|PTTG1|KNSTRN|NCAPG2|ESPL1|TUBG1|KIF14|PRC1|TRIP13|KIF4B|KIF23|CENPE|HASPIN|CDCA8|KNTC1|NUF2|DSN1|BUB1B|AURKC|KIF18A|SGO2|TEX14|SPDL1|NCAPG|USP44|NCAPH|NEK2|CDC20|DLGAP5|TTK|KATNB1|PLK1|UBE2DNL|REC8|CDC6|CENPK|SGO1|RAD21L1|TACC3|NDC80|BUB1|SPAG5|ZWINT|KIF2C|KIF4A|CUL3	47	2.65601e-05
regulation of reproductive process (GO:2000241)	biological_process	P3	PRDM9|CFAP206|NOX5|DEFB1|GLRA1|VIP|TCP11|TRIP13|SPATA22|OVOL1|CFAP69|BNC1|IHO1|NODAL|GPR149|ANKRD31|PSMA8|RAD51AP1|OOEP|MEIOC|CDC25C|SHH|HORMAD1|CCDC87|MEIOSIN|FAM170B|TAC4|TEX101|IQCF1|CDC20|TOPAZ1|MOS|TTK|ASTL|PRSS37|GDF9|FBXO43|POMZP3|CDC25A|OVGP1|NPM2|TPPP2|GCM1|PRDM7	44	0.000166483
cell cycle checkpoint (GO:0000075)	biological_process	P3	CEP63|STK33|GTSE1|GML|CRY1|CDK1|MUC1|ATRIP|BRCA1|TRIP13|RGCC|TICRR|TOPBP1|CLSPN|WEE1|BRIP1|RAD17|ZWILCH|KNTC1|CDC14C|BUB1B|E2F8|BLM|TEX14|SPDL1|CDC25C|DONSON|HORMAD1|USP44|NABP1|RAD9B|PLK2|NEK11|CDC20|CDC45|DOT1L|EME1|TTK|DTL|PLK1|PROX1|DNA2|CDC6|FANCD2|HMGA2|NDC80|FBXO6|BUB1|ZWINT	49	0.00485806
regulation of chromosome segregation (GO:0051983)	biological_process	P3	PTTG1|ESPL1|TRIP13|CENPE|IHO1|KNTC1|MKI67|BUB1B|TEX14|SPDL1|HORMAD1|USP44|CDC20|DLGAP5|MOS|TTK|KIF2B|PLK1|UBE2DNL|CDC6|TACC3|NDC80|BUB1|ZWINT|KIF2C|CUL3	26	0.0065415
metaphase/anaphase transition of cell cycle (GO:0044784)	biological_process	P3	ESPL1|TRIP13|CENPE|KNTC1|BUB1B|TEX14|SPDL1|USP44|CDC20|DLGAP5|MOS|TTK|PLK1|UBE2DNL|CDC6|TACC3|NDC80|BUB1|ZWINT|CUL3	20	0.0181687
metaphase/anaphase transition of mitotic cell cycle (GO:0007091)	biological_process	P3	ESPL1|TRIP13|CENPE|KNTC1|BUB1B|TEX14|SPDL1|USP44|CDC20|DLGAP5|TTK|PLK1|UBE2DNL|CDC6|TACC3|NDC80|BUB1|ZWINT|CUL3	19	0.0266549
regulation of chromosome separation (GO:1905818)	biological_process	P3	PTTG1|ESPL1|TRIP13|CENPE|KNTC1|BUB1B|TEX14|SPDL1|USP44|CDC20|DLGAP5|MOS|TTK|PLK1|UBE2DNL|CDC6|TACC3|NDC80|BUB1|ZWINT|CUL3	21	0.0278159
regulation of sister chromatid segregation (GO:0033045)	biological_process	P3	PTTG1|ESPL1|TRIP13|CENPE|KNTC1|BUB1B|TEX14|SPDL1|USP44|CDC20|DLGAP5|MOS|TTK|PLK1|UBE2DNL|CDC6|TACC3|NDC80|BUB1|ZWINT|CUL3	21	0.0278159
regulation of metaphase/anaphase transition of cell cycle (GO:1902099)	biological_process	P3	ESPL1|TRIP13|CENPE|KNTC1|BUB1B|TEX14|SPDL1|USP44|CDC20|DLGAP5|MOS|TTK|PLK1|UBE2DNL|CDC6|NDC80|BUB1|ZWINT|CUL3	19	0.032061
regulation of meiotic cell cycle phase transition (GO:1901993)	biological_process	P3	OVOL1|CDC25C|TOPAZ1|MOS|TTK|CDC25A	6	0.0326772
regulation of mitotic metaphase/anaphase transition (GO:0030071)	biological_process	P3	ESPL1|TRIP13|CENPE|KNTC1|BUB1B|TEX14|SPDL1|USP44|CDC20|DLGAP5|TTK|PLK1|UBE2DNL|CDC6|NDC80|BUB1|ZWINT|CUL3	18	0.0422929
cell cycle process (GO:0022402)	biological_process	P3	CEP76|MAEL|RACGAP1|CEP55|DRD2|SMC1B|PRDM9|PTTG1|CEP63|C10orf90|STK33|KNSTRN|NOX5|MEIKIN|NCAPG2|CCNE1|BRCA2|GTSE1|KNL1|INSC|GML|DDIAS|TEX19|POC1B|KIF20A|CEP250|BRDT|KIF3B|CEP152|MEIOB|SYCE1|ESPL1|LPIN1|NUPR2|CDK1|CEP164|TUBG1|STOX1|CCNA2|MUC1|C11orf80|SOX2|CDKN2D|CCNE2|KIF14|PKHD1|LATS2|BRCA1|FANCM|AHCTF1|PRC1|TRIP13|CDK7|HORMAD2|KIF4B|SPATA22|RGCC|CNTRL|KIF23|CENPE|CETN3|SEPTIN3|CRNN|CENPA|SHCBP1…	268	7.63256e-09
cell cycle (GO:0007049)	biological_process	P3	CEP76|MAEL|RACGAP1|CEP55|CDK5R2|HJURP|DRD2|SMC1B|PRDM9|PTTG1|CEP63|C10orf90|KIF15|STK33|KNSTRN|NOX5|MEIKIN|FANCI|NCAPG2|CCNE1|BRCA2|MCIDAS|GTSE1|KNL1|INSC|GML|REC114|DDIAS|FOXG1|TEX19|CDCA2|POC1B|CRY1|KIF20A|CEP250|BRDT|KIF3B|CEP152|MEIOB|SYCE1|ESPL1|LPIN1|NUPR2|CDK1|CEP164|TUBG1|STOX1|CCNA2|MUC1|C11orf80|SOX2|CDKN2D|CCNE2|KIF14|CDKL4|PKHD1|ATRIP|LATS2|BRCA1|FANCM|NUP88|AHCTF1|PRC1|TRIP13|CDK7|HO…	338	8.23149e-09
DNA recombination (GO:0006310)	biological_process	P3	RNF138|PRDM9|SFR1|VRTN|BRCA2|REC114|TEX19|H1-1|ZSCAN4|HROB|POLB|MEIOB|RAG2|C11orf80|BRCA1|PARPBP|FANCM|TRIP13|SPO11|DMC1|MCMDC2|POLN|BRIP1|IHO1|C1orf146|RNF212B|ANKRD31|MND1|RAD54L|IGHMBP2|RAD51AP1|KASH5|BLM|OOEP|TEX15|RECQL4|EID3|RAD51|INO80C|HFM1|RAD51AP2|EXO1|H1-6|H1-9P|INO80E|SLX4|SYCP1|RUVBL2|NABP1|HSF2BP|IL4|XRCC2|MMS22L|CDC45|PSMC3IP|IL10|EME1|C14orf39|ZCWPW1|MCM8|IL2|CNTD1|TOP2A|REC8|MSH4…	76	9.21874e-07
cytoskeleton organization (GO:0007010)	biological_process	P3	CEP76|RACGAP1|CFAP157|TESK2|CFAP206|CEP63|C10orf90|NPHP4|KNSTRN|ITPKA|NPHP1|FOXJ1|BRCA2|MCIDAS|INSC|LCP1|CCDC63|FMN1|SPATA4|CRACD|POC1B|UGT8|KIF20A|CEP250|FSIP2|PAK5|KIF3B|RSPH6A|CNN1|CEP152|ESPL1|IQCG|CDK1|DNAH8|CFAP46|TUBG1|KIF24|HOATZ|ODAD3|SPEF2|DNAI4|MAST1|PKHD1|MAPT|BRCA1|PRC1|MYO1G|KIF4B|RGCC|HOOK1|CNTRL|DNAL1|KIF23|CENPE|CETN3|PRPH|CENPA|TTLL2|CAPZA3|ARHGAP40|KLHL41|SPATA7|TTBK2|NPHS1|ATP…	252	1.39834e-06
cell division (GO:0051301)	biological_process	P3	RACGAP1|CEP55|DRD2|PTTG1|CEP63|KNSTRN|NOX5|NCAPG2|CCNE1|BRCA2|KNL1|INSC|CDCA2|KIF20A|KIF3B|SYCE1|ESPL1|CDK1|CEP164|STOX1|CCNA2|CCNE2|KIF14|LATS2|AHCTF1|PRC1|CDK7|KIF4B|CNTRL|KIF23|CENPE|CETN3|SEPTIN3|CENPA|SHCBP1L|SPIRE1|WEE1|CDCA8|CETN1|GIT1|BRIP1|FGF4|NEK4|ZWILCH|WNT7A|KNTC1|NUF2|CABLES2|CDC14C|LMLN|DSN1|BUB1B|AURKC|SGO2|OIP5|SEPTIN4|DRD3|E2F8|CCNB3|BLM|TEX14|PPP1R1C|CDC14A|OOEP|SPDL1|SYCP3|CDC…	127	4.42705e-06
sensory perception of light stimulus (GO:0050953)	biological_process	P3	GNAT1|GUCY2D|GLRA1|PDE6A|CNGB3|CEP250|PDE6D|ARL6|GRK7|TRPM1|MYO3A|SLC4A10|GUCY2F|CRYGC|SPATA7|ATP8A2|PCDH15|VSX2|LRIT3|ZIC2|RIMS1|USH2A|OPN5|RGS9BP|COL11A1|EYA4|CRYBA1|CRYBA2|MYO3B|TULP2|RPE65|RGR|SIX3|RP1|LRAT|SLC45A2|RRH|RLBP1|COL2A1|ABCA4|RDH8|LCTL|GUCA1A|CRB1|CLRN1|USH1C|CNGB1|FAM161A|RPGR|SIX6|RPGRIP1|MYO9A|PDC|USH1G|PPEF2	55	0.000122714
visual perception (GO:0007601)	biological_process	P3	GNAT1|GUCY2D|GLRA1|PDE6A|CNGB3|CEP250|PDE6D|ARL6|GRK7|TRPM1|MYO3A|SLC4A10|GUCY2F|CRYGC|SPATA7|ATP8A2|VSX2|LRIT3|ZIC2|RIMS1|USH2A|OPN5|RGS9BP|COL11A1|EYA4|CRYBA1|CRYBA2|MYO3B|TULP2|RPE65|RGR|SIX3|RP1|LRAT|SLC45A2|RRH|RLBP1|COL2A1|ABCA4|RDH8|LCTL|GUCA1A|CRB1|CLRN1|CNGB1|FAM161A|RPGR|SIX6|RPGRIP1|MYO9A|PDC|PPEF2	52	0.000667755
cell projection organization (GO:0030030)	biological_process	P3	CEP76|SPAG6|CFAP157|CSMD3|DRD2|DSCAM|TNC|CFAP206|CEP63|NPHP4|ITPKA|NPHP1|IFT88|FOXJ1|BBOF1|MCIDAS|EVI5L|CCDC63|FOXG1|POC1B|UGT8|DCC|NME5|CEP250|FSIP2|KIF3B|RSPH6A|CEP152|IQCG|CDK1|CEP164|DNAH8|CFAP46|TUBG1|KIF24|CFAP52|POU4F2|STK36|HOATZ|ODAD3|RNF6|ARL6|SPEF2|DNAI4|WDR90|PKHD1|MAPT|AK7|PPFIA2|PARP6|CNTRL|DNAL1|GBX1|CEP162|TEKT1|KLHL41|CFAP221|CCDC96|TTBK2|ATP8A2|EHD1|CFAP97D1|TIAM2|WEE1|ODAD2|CFA…	269	0.000222974
plasma membrane bounded cell projection organization (GO:0120036)	biological_process	P3	CEP76|CFAP157|CSMD3|DRD2|DSCAM|TNC|CFAP206|CEP63|NPHP4|ITPKA|NPHP1|IFT88|FOXJ1|BBOF1|MCIDAS|EVI5L|CCDC63|FOXG1|POC1B|UGT8|DCC|NME5|CEP250|FSIP2|KIF3B|RSPH6A|CEP152|IQCG|CDK1|CEP164|DNAH8|CFAP46|TUBG1|KIF24|CFAP52|POU4F2|STK36|HOATZ|ODAD3|RNF6|ARL6|SPEF2|DNAI4|WDR90|PKHD1|MAPT|PPFIA2|PARP6|CNTRL|DNAL1|GBX1|CEP162|TEKT1|KLHL41|CFAP221|CCDC96|TTBK2|ATP8A2|EHD1|CFAP97D1|TIAM2|WEE1|ODAD2|CFAP61|CFAP69…	258	0.00118925
organelle organization (GO:0006996)	biological_process	P3	CEP76|STX2|MAEL|RACGAP1|CFAP157|COX7A2|HIPK4|TESK2|RETREG1|HJURP|GOLGA8Q|SMC1B|ESYT3|PRDM9|CFAP206|PTTG1|CEP63|C10orf90|NPHP4|HCFC2|KNSTRN|GOLGA6C|ITPKA|MEIKIN|NPHP1|IFT88|GOLGA8S|FOXJ1|NCAPG2|BBOF1|IAPP|CCNE1|BRCA2|MCIDAS|SUN3|CHGA|ENO4|KNL1|INSC|LCP1|COPRS|EVI5L|CCDC63|HIGD2B|FMN1|SPATA4|TEX19|ZPBP2|TBC1D12|CRACD|POC1B|H1-1|UGT8|KIF20A|PRM1|NME5|CEP250|ZSCAN4|FSIP2|PAK5|BRDT|KIF3B|IDE|TYRP1|RSP…	610	0.000284438
mitotic cell cycle (GO:0000278)	biological_process	P3	CEP76|RACGAP1|CEP55|SMC1B|PTTG1|CEP63|KIF15|STK33|KNSTRN|NCAPG2|CCNE1|BRCA2|MCIDAS|GTSE1|INSC|GML|DDIAS|FOXG1|KIF20A|CEP250|KIF3B|CEP152|ESPL1|LPIN1|CDK1|CEP164|TUBG1|STOX1|CCNA2|MUC1|CDKN2D|CCNE2|KIF14|PKHD1|LATS2|BRCA1|NUP88|PRC1|TRIP13|CDK7|KIF4B|RGCC|CNTRL|KIF23|CENPE|CENPA|BRINP2|TICRR|TOPBP1|CLSPN|MCM10|BRINP3|MCMDC2|HASPIN|WEE1|CDCA8|OVOL1|CETN1|RAD17|DBF4|NEK4|ZWILCH|KNTC1|NUF2|HMMR|TUBB8…	186	0.000296056
mitotic cell cycle process (GO:1903047)	biological_process	P3	CEP76|RACGAP1|CEP55|SMC1B|PTTG1|CEP63|STK33|KNSTRN|NCAPG2|CCNE1|BRCA2|GTSE1|INSC|GML|KIF20A|CEP250|KIF3B|CEP152|ESPL1|LPIN1|CDK1|CEP164|TUBG1|STOX1|CCNA2|MUC1|CDKN2D|CCNE2|KIF14|PKHD1|LATS2|BRCA1|PRC1|TRIP13|CDK7|KIF4B|RGCC|CNTRL|KIF23|CENPE|CENPA|TICRR|TOPBP1|CLSPN|MCM10|MCMDC2|HASPIN|WEE1|CDCA8|RAD17|DBF4|ZWILCH|KNTC1|NUF2|HMMR|MKI67|CDC14C|DSN1|BUB1B|AURKC|PSMA8|KIF18A|SGO2|PKMYT1|DRD3|E2F8|CC…	160	0.00131756
multicellular organismal process (GO:0032501)	biological_process	P3	CDH20|TREML1|STX2|MAEL|RACGAP1|SPATA24|CFAP157|GNAT1|CEP55|GLP1R|CSMD3|SLC12A6|ACTN3|TESK2|RETREG1|CDK5R2|DRD2|SPESP1|MMRN1|OR2F2|DSCAM|OPRM1|LAMB4|PASK|PRDM9|MYH7|ACRV1|TNC|CFAP206|OR8G1|SMR3B|DMRT3|PTTG1|FFAR4|AKAP1|MB|ZAR1|TPH1|RADIL|NPHP4|FOXP2|LPAR5|GJB5|DLGAP1|NOX5|ITPKA|NLRC3|OR7E24|IL21|MEIKIN|PDE3B|TDRD6|NPHP1|ATP2B2|DKK4|CLEC9A|OR7D2|DEFB1|IFT88|FOXJ1|NCAPG2|IAPP|SHISA9|BRCA2|ASB4|ROPN1…	1108	0.00139234
inorganic anion transport (GO:0015698)	biological_process	P3	RACGAP1|SLC12A6|GLRA1|FGF23|SLC12A1|SLC4A10|SLC25A10|ANO2|LRRC8B|CLCA4|CLCN1|CLCA2|CCT8L2|CLCA3P|CFTR|SLC13A1|GABRG3|SLC26A8|GLRA3|LRRC8E|ANO3|BEST2|SLC26A4|BEST3|GRM5|NMUR1|GABRR3|SLC34A1|ANO5|SLC37A1|SLC4A4|ANO1|TG|ROS1|GABRA4|AQP6|SLC17A1|CA7|SLC1A4	39	0.0334269
cilium (GO:0005929)	cellular_component	P3	SPAG6|CFAP157|GNAT1|DRD2|AKAP14|CFAP206|AGBL2|FFAR4|NPHP4|FANK1|SLC9B1|NPHP1|DEFB1|IFT88|BBOF1|ROPN1L|CCDC181|SPA17|GUCY2D|CCDC63|PDE6A|SPATA4|POC1B|CNGB3|CATSPER2|NME5|DNAH11|SLC25A31|CEP250|FSIP2|KIF3B|TTLL8|TSSK4|PDE6D|RSPH6A|AK8|IQCG|CEP164|DNAH8|CFAP46|CFAP52|HOATZ|ODAD3|PMFBP1|TCP11|CATSPERE|ARL6|SPEF2|DNAI4|ENKUR|GRK7|AKAP3|PKHD1|SPATA6L|AK7|TXNDC8|DRC3|CNTRL|DNAL1|DNALI1|GUCY2F|CEP162|TTL…	272	7.99942e-69
motile cilium (GO:0031514)	cellular_component	P3	SPAG6|DRD2|CFAP206|SLC9B1|NPHP1|DEFB1|IFT88|ROPN1L|CCDC181|SPA17|CATSPER2|NME5|DNAH11|SLC25A31|FSIP2|TSSK4|RSPH6A|AK8|IQCG|DNAH8|CFAP52|PMFBP1|TCP11|CATSPERE|SPEF2|DNAI4|ENKUR|AKAP3|SPATA6L|AK7|TXNDC8|DRC3|DNALI1|TEKT1|CST11|CFAP61|ADCY10|DCDC2C|ZBBX|CFAP69|CFAP300|RSPH1|CABS1|IQUB|DNAH2|DNAH17|CFAP44|PGK2|MROH2B|SEPTIN4|RSPH9|ROPN1|CFAP100|FLACC1|RSPH4A|SUN5|NME8|SPATA6|CABYR|CFAP43|EFCAB9|DRC7|…	121	3.56338e-51
9+2 motile cilium (GO:0097729)	cellular_component	P3	SPAG6|DRD2|SLC9B1|DEFB1|IFT88|CCDC181|SPA17|NME5|DNAH11|FSIP2|TSSK4|RSPH6A|AK8|IQCG|DNAH8|PMFBP1|TCP11|CATSPERE|SPEF2|ENKUR|AKAP3|SPATA6L|TXNDC8|DNALI1|CST11|DCDC2C|CFAP69|RSPH1|DNAH2|DNAH17|PGK2|MROH2B|SEPTIN4|RSPH9|FLACC1|SUN5|NME8|SPATA6|CABYR|CFAP43|EFCAB9|SAXO1|DNAI2|DNAH1|SEPTIN12|CABCOCO1|SPACA3|SAXO2|TTC29|MNS1|DNAH9|SPEF1|ODF1|TEKT3|ATP1A4|TCTE1|CATSPER4|IFT172|QRICH2|CCDC172|CFAP65|SPAC…	75	4.97298e-33
sperm flagellum (GO:0036126)	cellular_component	P3	SPAG6|DRD2|SLC9B1|DEFB1|IFT88|CCDC181|SPA17|NME5|FSIP2|TSSK4|RSPH6A|AK8|IQCG|DNAH8|PMFBP1|TCP11|CATSPERE|SPEF2|ENKUR|AKAP3|SPATA6L|TXNDC8|DNALI1|CST11|DCDC2C|CFAP69|RSPH1|DNAH2|DNAH17|PGK2|MROH2B|SEPTIN4|FLACC1|SUN5|NME8|SPATA6|CABYR|EFCAB9|SAXO1|DNAI2|DNAH1|SEPTIN12|CABCOCO1|SPACA3|SAXO2|TTC29|MNS1|ODF1|TEKT3|ATP1A4|TCTE1|CATSPER4|IFT172|QRICH2|CCDC172|CFAP65|SPACA9|CFAP251|CFAP70|CATSPERD|ODF2|…	70	2.6194e-31
ciliary plasm (GO:0097014)	cellular_component	P3	SPAG6|AKAP14|CFAP206|CCDC63|SPATA4|DNAH11|TTLL8|RSPH6A|AK8|DNAH8|CFAP46|ODAD3|ARL6|DNAI4|DRC3|DNAL1|DNALI1|CEP162|CFAP221|SPATA7|CCDC96|ODAD2|DNAI7|CFAP61|NEK4|DYNC2I2|DNAH10|DNAH2|DNAH17|RPGRIP1L|CFAP74|RSPH9|CCDC113|CCDC40|CFAP100|RSPH4A|NME8|TTC30A|IFT57|HYDIN|CFAP43|SAXO1|DNAI2|DNAH1|MAK|ODAD1|SAXO2|DNAH6|CCDC65|DNAH7|MNS1|LCA5L|EFHC1|DNAH9|SPEF1|EFHC2|RP1|DNHD1|CFAP54|DNAH14|SPAG17|CFAP91|IF…	74	3.4851e-28
axoneme (GO:0005930)	cellular_component	P3	SPAG6|AKAP14|CFAP206|CCDC63|SPATA4|DNAH11|TTLL8|RSPH6A|AK8|DNAH8|CFAP46|ODAD3|ARL6|DNAI4|DRC3|DNAL1|DNALI1|CEP162|CFAP221|SPATA7|CCDC96|ODAD2|DNAI7|CFAP61|DYNC2I2|DNAH10|DNAH2|DNAH17|RPGRIP1L|CFAP74|RSPH9|CCDC113|CCDC40|CFAP100|RSPH4A|NME8|TTC30A|IFT57|HYDIN|CFAP43|SAXO1|DNAI2|DNAH1|MAK|ODAD1|SAXO2|DNAH6|CCDC65|DNAH7|MNS1|LCA5L|EFHC1|DNAH9|SPEF1|EFHC2|RP1|DNHD1|CFAP54|DNAH14|SPAG17|CFAP91|IFT172|…	72	5.11085e-27
plasma membrane bounded cell projection cytoplasm (GO:0032838)	cellular_component	P3	SPAG6|AKAP14|OPRM1|CFAP206|CCDC63|SPATA4|DNAH11|KIF3B|TTLL8|RSPH6A|AK8|DNAH8|CFAP46|ODAD3|ARL6|DNAI4|MAPT|DRC3|DNAL1|DNALI1|CEP162|CFAP221|SPATA7|CCDC96|ODAD2|DNAI7|CFAP61|AP3B2|NEK4|DYNC2I2|TMEM108|DNAH10|WASF1|DNAH2|DNAH17|RPGRIP1L|RAB27B|CFAP74|RSPH9|CCDC113|CCDC40|CFAP100|RSPH4A|NME8|TTC30A|IFT57|HYDIN|CFAP43|SAXO1|DNAI2|DNAH1|MAK|ODAD1|SAXO2|DNAH6|CCDC65|DNAH7|MNS1|LCA5L|EFHC1|DNAH9|SPEF1|EF…	86	3.31524e-19
cytoplasmic region (GO:0099568)	cellular_component	P3	SPAG6|AKAP14|OPRM1|CFAP206|INSC|CCDC63|SPATA4|DNAH11|KIF3B|TTLL8|RSPH6A|AK8|DNAH8|CFAP46|ODAD3|ARL6|DNAI4|MAPT|DRC3|DNAL1|DNALI1|CEP162|CFAP221|SPATA7|CCDC96|ODAD2|DNAI7|CFAP61|AP3B2|NEK4|DYNC2I2|TMEM108|DNAH10|WASF1|DNAH2|DNAH17|RPGRIP1L|RAB27B|CFAP74|RSPH9|RIMS1|CCDC113|CCDC40|CFAP100|OOEP|RSPH4A|NME8|TTC30A|IFT57|HYDIN|CFAP43|BSN|SAXO1|DNAI2|DNAH1|MAK|ODAD1|SAXO2|DNAH6|CCDC65|DNAH7|MNS1|LCA5L|…	91	3.4241e-16
plasma membrane bounded cell projection (GO:0120025)	cellular_component	P3	SPAG6|STX2|CFAP157|GNAT1|ACTN3|CDK5R2|DRD2|AKAP14|DSCAM|SLC6A12|OPRM1|CFAP206|AGBL2|FFAR4|TPH1|NPHP4|FANK1|KNSTRN|ITPKA|SLC9B1|NPHP1|DEFB1|IFT88|BBOF1|SHISA9|ROPN1L|CCDC181|SPA17|LCP1|GUCY2D|CCDC63|GLRA1|PDE6A|SAMD4A|SPATA4|POC1B|CNGB3|CATSPER2|DCC|LHFPL4|CA2|GRIN1|SCN11A|NME5|DNAH11|SLC25A31|CEP250|ANKS1B|FSIP2|KIF3B|TTLL8|TSSK4|PDE6D|RSPH6A|GRIA1|VIP|AK8|PDYN|IQCG|CEP164|DNAH8|CFAP46|CFAP52|HOA…	462	1.52878e-22
cell projection (GO:0042995)	cellular_component	P3	SPAG6|STX2|CFAP157|GNAT1|ACTN3|CDK5R2|DRD2|AKAP14|DSCAM|SLC6A12|OPRM1|CFAP206|AGBL2|FFAR4|TPH1|NPHP4|FANK1|KNSTRN|ITPKA|SLC9B1|NPHP1|DEFB1|IFT88|BBOF1|SHISA9|ROPN1L|CCDC181|SPA17|LCP1|GUCY2D|CCDC63|GLRA1|PDE6A|SAMD4A|SPATA4|POC1B|CNGB3|CATSPER2|DCC|LHFPL4|CA2|GRIN1|SCN11A|NME5|DNAH11|SLC25A31|CEP250|ANKS1B|FSIP2|KIF3B|TTLL8|TSSK4|PDE6D|RSPH6A|GRIA1|VIP|AK8|PDYN|IQCG|CEP164|DNAH8|CFAP46|CFAP52|HOA…	476	5.85441e-22
microtubule cytoskeleton (GO:0015630)	cellular_component	P3	CEP76|SPAG6|RACGAP1|CFAP157|CEP55|CFAP206|AGBL2|CCDC116|CEP63|C10orf90|RADIL|NPHP4|KIF15|FANK1|KNSTRN|NLRC3|IFT88|BBOF1|CCNE1|BRCA2|CCDC181|GTSE1|POC1B|KIF20A|C9orf24|PIK3R5|DNAH11|CEP250|KIF3B|TTLL8|POLB|CEP152|ESPL1|SHCBP1|IQCG|CDK1|CEP164|DNAH8|TUBG1|STOX1|KIF24|ODAD3|ARL6|SPEF2|CCNE2|DNAI4|AGBL5|KIF14|WDR90|PKHD1|TTC23L|LATS2|MAPT|BRCA1|PRC1|HORMAD2|KIF4B|RGCC|HOOK1|CNTRL|DNAL1|KIF23|CENPE|CE…	302	4.07402e-20
acrosomal vesicle (GO:0001669)	cellular_component	P3	RACGAP1|DRD2|SPESP1|ACRV1|PATE4|KNL1|ZPBP2|GLIPR1L1|SH3GL3|TSSK4|TMEM225|TCP11|ENKUR|DKKL1|AKAP3|TXNDC8|CCDC136|ATP6V1E2|TMPRSS12|SPACA4|NUDT1|EQTN|TMEM95|SPACA7|IQUB|SV2B|SPAM1|MROH2B|ACRBP|STK31|CYLC1|SPAG8|POMT1|CAPN11|TBC1D21|SPACA3|MORN2|CATSPER3|FAM170B|TEX101|TSSK1B|ATP8B3|IQCF1|TEKT3|CATSPER4|ACR|PRSS37|IL4I1|PCSK4|SPACA1|CFAP65|IZUMO1|SPINK2|SPACA9|ZPBP|TRIM36|PRSS55|FABP9|LYZL4	59	1.10223e-19
cytoskeleton (GO:0005856)	cellular_component	P3	CEP76|SPAG6|RACGAP1|CFAP157|CEP55|ACTN3|AKAP14|MYH7|CFAP206|AGBL2|CCDC116|CEP63|C10orf90|RADIL|NPHP4|KIF15|FANK1|KNSTRN|NLRC3|NPHP1|IFT88|BBOF1|CCNE1|BRCA2|CCDC181|GTSE1|KRTAP21-2|LCP1|CCDC63|FMN1|SPATA4|MST1R|LRRC10|POC1B|KIF20A|C9orf24|PIK3R5|DNAH11|CEP250|KIF3B|TTLL8|PDE6D|RSPH6A|POLB|CNN1|CEP152|AK8|ESPL1|SHCBP1|IQCG|CDK1|CEP164|DNAH8|CFAP46|TUBG1|STOX1|KIF24|KRT83|ODAD3|ARL6|SPEF2|CCNE2|DNAI…	455	4.90503e-16
condensed nuclear chromosome (GO:0000794)	cellular_component	P3	SMC1B|BRCA2|SYCE1|TUBG1|BRCA1|HORMAD2|CENPA|TOPBP1|DMC1|SYCP2L|IHO1|RSPH1|NUF2|RNF212B|DSN1|BUB1B|KASH5|BLM|RAD51|SYCP3|TEX12|HORMAD1|NEK2|SYCP1|FAM9B|FKBP6|RAD9B|FAM9C|C14orf39|SYCE2|PLK1|SYCE1L|REC8|MSH4|CENPK|SYCP2|RCC1|SYCE3|RAD21L1|HSPA2|FAM9A|STAG3|NDC80|TEX11|BUB1	45	1.50156e-14
synaptonemal complex (GO:0000795)	cellular_component	P3	SMC1B|BRCA2|SYCE1|BRCA1|HORMAD2|SYCP2L|RNF212B|KASH5|BLM|RAD51|SYCP3|TEX12|HORMAD1|SYCP1|FAM9B|FKBP6|FAM9C|C14orf39|SYCE2|PLK1|SYCE1L|REC8|MSH4|SYCP2|SYCE3|RAD21L1|HSPA2|FAM9A|STAG3|TEX11	30	4.96753e-15
synaptonemal structure (GO:0099086)	cellular_component	P3	SMC1B|BRCA2|SYCE1|BRCA1|HORMAD2|SYCP2L|RNF212B|KASH5|BLM|RAD51|SYCP3|TEX12|HORMAD1|SYCP1|FAM9B|FKBP6|FAM9C|C14orf39|SYCE2|PLK1|SYCE1L|REC8|MSH4|SYCP2|SYCE3|RAD21L1|HSPA2|FAM9A|STAG3|TEX11	30	4.96753e-15
condensed chromosome (GO:0000793)	cellular_component	P3	HJURP|SMC1B|KNSTRN|MEIKIN|BRCA2|KNL1|SYCE1|TUBG1|BRCA1|AHCTF1|HORMAD2|CENPE|CENPA|TOPBP1|DMC1|SYCP2L|ZWILCH|IHO1|RSPH1|KNTC1|NUF2|RNF212B|MKI67|DSN1|BUB1B|AURKC|SGO2|KASH5|BLM|TEX14|LRWD1|EID3|RAD51|SPDL1|SYCP3|CENPW|TEX12|NCAPG|HORMAD1|BOD1L2|NEK2|SYCP1|FAM9B|FKBP6|RAD9B|FAM9C|KIF2B|C14orf39|SYCE2|PLK1|TOP2A|SYCE1L|REC8|MSH4|CENPK|SYCP2|FANCD2|CENPU|SPC24|RCC1|BIRC5|SYCE3|SGO1|RAD21L1|HSPA2|FAM9…	73	7.20397e-12
lateral element (GO:0000800)	cellular_component	P3	SMC1B|BRCA2|BRCA1|SYCP2L|KASH5|BLM|RAD51|SYCP3|REC8|SYCP2|RAD21L1	11	6.34242e-06
nuclear chromosome (GO:0000228)	cellular_component	P3	SMC1B|SFR1|BRCA2|SYCE1|TUBG1|BRCA1|HORMAD2|CENPA|SPO11|TOPBP1|MCM10|DMC1|SYCP2L|IHO1|RSPH1|NUF2|RNF212B|DSN1|BRD8|BUB1B|KASH5|BLM|LRWD1|RAD51|BAZ1A|POLE|INO80C|SYCP3|TEX12|INO80E|HORMAD1|NEK2|SLX4|SYCP1|RUVBL2|FAM9B|FKBP6|RAD9B|FAM9C|MMS22L|C14orf39|SYCE2|PLK1|TOP2A|SYCE1L|REC8|MSH4|CENPK|SYCP2|HMGA2|RCC1|BIRC5|SYCE3|RAD21L1|HSPA2|FAM9A|STAG3|NDC80|TEX11|GINS2|BUB1|SWI5	62	8.74558e-06
central element (GO:0000801)	cellular_component	P3	SYCE1|TEX12|SYCP1|C14orf39|SYCE2|SYCE3|TEX11	7	0.000365242
Golgi cis cisterna (GO:0000137)	cellular_component	P3	GOLGA8Q|GOLGA6C|GOLGA8S|GOLGA8CP|GOLGA6A|GOLGA8O|ATL1|GOLGA8N|NSG2|GOLGA8J|GOLGA6D|GOLGA8K|GOLGA8T|GOLGA8DP|GOLGA6B|GOLGA2P5	16	7.2381e-06
male germ cell nucleus (GO:0001673)	cellular_component	P3	TRIP13|TOPBP1|TNP1|H1-9P|KIF6|SYCP1|MORC1|REC8|HSPA2|TCFL5|ACTL7A	11	1.77085e-05
germ cell nucleus (GO:0043073)	cellular_component	P3	TRIP13|TOPBP1|TNP1|H1-9P|KIF6|SYCP1|MORC1|REC8|HSPA2|TCFL5|ACTL7A	11	0.000461605
axonemal dynein complex (GO:0005858)	cellular_component	P3	DNAH8|DNAI4|DNAL1|DNAI7|DNAH2|DNAH17|NME8|DNAI2|DNAH1|ODAD1|DNAH6|CCDC65|DNAH7|DNAH9|DNHD1|DNAH14|DNAI1|DRC1|CFAP70|DNAI3	20	8.89554e-13
sperm principal piece (GO:0097228)	cellular_component	P3	SPAG6|SLC9B1|SPA17|FSIP2|CATSPERE|ENKUR|AKAP3|NME8|CABYR|EFCAB9|CATSPER4|IFT172|CATSPERD|CATSPERG	14	7.18553e-06
CatSper complex (GO:0036128)	cellular_component	P3	CATSPER2|CATSPERE|CATSPER3|CATSPER4|HSPA2|CATSPER1|CATSPERD|CATSPERG|CATSPERB	9	1.0415e-05
outer dynein arm (GO:0036157)	cellular_component	P3	DNAH8|DNAL1|DNAH17|NME8|DNAI2|ODAD1|DNAH9|DNAI1|CFAP70	9	4.72557e-05
acrosomal membrane (GO:0002080)	cellular_component	P3	TMEM225|CCDC136|EQTN|TMEM95|ACRBP|SPACA3|FAM170B|ATP8B3|TEKT3|PCSK4|SPACA1|CFAP65|IZUMO1|ZPBP	14	5.47989e-05
radial spoke (GO:0001534)	cellular_component	P3	CFAP206|RSPH6A|CFAP61|RSPH9|RSPH4A|CFAP91|CFAP251	7	5.47989e-05
axonemal microtubule (GO:0005879)	cellular_component	P3	CFAP206|ARL6|CEP162|RPGRIP1L|TTC30A|SAXO1|SAXO2	7	0.00122408
[truncated: 875 more rows]
